# Supplementary material for: High-throughput proteomics fiber typing (ProFiT) for comprehensive characterization of single skeletal muscle fibers
Source: Skelet Muscle. 2020 Mar 23;10:7. doi: 10.1186/s13395-020-00226-5 (PMC7087369; doi:10.1186/s13395-020-00226-5)
Supplement: Supplementary file 7 — Additional file 7 : Table S2: Data for short LC-MS gradients related to Suppl. Figure 1. S2_AbsProtCopyNr: Absolute protein copy numbers per muscle fiber nucleus either calculated using the Proteomics Dynamic Range Standard (UPS2) kit or the proteomic ruler approach, related to Suppl. Figure 1A-B. S2_Identifications-1-7: Peptide and protein groups output table of different LC-MS gradients measured with the Easy nLC II-LTQ-Orbitrap Discovery system, related to Suppl. Figure 1C – E. S2_proteingroups_CAPvsnLC: Protein groups output table of single fiber ProFiT runs using the Easy nLC II - LTQ Orbitrap and capillary LC/quadrupole Orbitrap system, related to Suppl. Figure 1F. S2_peptides_CAPvsnLC: Peptide output table of single fiber ProFiT runs using the Easy nLC II - LTQ Orbitrap and capillary LC/quadrupole Orbitrap system, related to Suppl. Figure 1G. S2_CarryOver: List of log2 LFQ intensities of short gradients with six muscle fibers and blank runs to test for potential carryover, related to Suppl. Figure 1H. S2_Top5MyHCPeptides: List of MyHC peptides analyzed with ProFit with its mass, retention time and peptide scores measured on an Easy nLC II - LTQ Orbitrap or a capillary LC/quadrupole Orbitrap system, related to Suppl. Figure 1I-J [file 13395_2020_226_MOESM7_ESM.xlsx]

## Sheet: S2_AbsProtCopyNr
Absolute protein copy numbers either calculates with the Proteomic Ruler approach (PR) or by linear regression using the Proteomics Dynamic Range Standard (UPS2) kit
CN/Nucleus PR_Mouse_01_01	CN/Nucleus PR_Mouse_02_01	CN/Nucleus PR_Mouse_03_02	CN/Nucleus UPS2_Mouse_01_01	CN/Nucleus UPS2_Mouse_01_02	CN/Nucleus UPS2_Mouse_02_01	CN/Nucleus UPS2_Mouse_03_01	CN/Nucleus UPS2_Mouse_03_02	Average CN/Nucleus UPS2	Average_CN/Nucleus UPS2	Histones	UPS2 Proteins	Peptides	Razor + unique peptides	Unique peptides	Sequence coverage [%]	Unique + razor sequence coverage [%]	Unique sequence coverage [%]	Mol. weight [kDa]	Q-value	Score	Intensity	MS/MS Count	Sequence length	Average molecular mass	Protein IDs	Majority protein IDs	Protein names	Gene names
NaN	NaN	NaN	NaN	NaN	NaN	NaN	NaN	NaN	NaN	-	-	1	1	1	0.7	0.7	0.7	193.42	0.0074074	1.5178	0	3	1682	193426	E9Q7R9	E9Q7R9		Cfap43
NaN	NaN	NaN	NaN	NaN	NaN	NaN	NaN	NaN	NaN	-	-	1	1	1	0.8	0.8	0.8	135.88	0.0028209	2.2834	0	5	1182	135886	F7CB97	F7CB97		Clip1
92004.5	81075.6	44242	NaN	NaN	NaN	NaN	NaN	72440.7	NaN	-	-	1	1	1	4	4	4	57.147	0.0015221	3.0449	131360000	6	501	57147.2	Q922B2	Q922B2	Aspartate--tRNA ligase, cytoplasmic	Dars
847643	1.01677e+06	433541	NaN	NaN	NaN	NaN	NaN	765984	NaN	-	-	1	1	1	12.4	12.4	12.4	10.35	0.0026042	1.8019	322960000	0	89	10349.8	Q9D0M5;P63168	Q9D0M5;P63168	Dynein light chain 2, cytoplasmic;Dynein light chain 1, cytoplasmic	Dynll2;Dynll1
205985	257344	178046	NaN	NaN	NaN	NaN	NaN	213791	NaN	-	-	1	1	1	1.3	1.3	1.3	81.472	0.0014837	2.7273	798260000	1	716	81473.1	A0A140T8J1;Q8BZ52	A0A140T8J1;Q8BZ52	Fibronectin type III and SPRY domain-containing protein 2	Fsd2
66841.6	NaN	NaN	NaN	NaN	NaN	NaN	NaN	66841.6	NaN	-	-	1	1	1	0.5	0.5	0.5	147.01	0.0014881	2.7366	196920000	1	1317	147010	Q7TQA1	Q7TQA1	Immunoglobulin superfamily member 1	Igsf1
73788.1	NaN	NaN	NaN	NaN	NaN	NaN	NaN	73788.1	NaN	-	-	1	1	1	1.5	1.5	1.5	82.843	0	3.5685	113930000	1	748	82844.2	P16332	P16332	Methylmalonyl-CoA mutase, mitochondrial	Mut
54918.9	NaN	NaN	NaN	NaN	NaN	NaN	NaN	54918.9	NaN	-	-	1	1	1	2.5	2.5	2.5	45.96	0.0014327	2.3993	88481000	1	406	45960.2	Q99KU0	Q99KU0	Vacuole membrane protein 1	Vmp1
8.64996e+08	1.32393e+09	9.30692e+08	282036000000	289894000000	350490000000	235344000000	308698000000	1.03987e+09	293292400000	-	-	160	160	26	69.7	69.7	15.4	223.34	0	323.31	17292000000000	11386	1942	223342	Q5SX40;Q1WNQ6;Q8BVF4	Q5SX40	Myosin-1	Myh1
3.2494e+07	4.4387e+07	3.03267e+07	73489300000	71570600000	123480000000	65037100000	109565000000	3.57359e+07	88628400000	-	-	1516	1516	23	52.4	52.4	0.9	3906.4	0	323.31	9433100000000	14457	35213	3906490	A2ASS6;F7CR78;F6ZZ75;A2AT62;A2AT63;F6ZRX7;F6Q6Z0;A2AT61;A0A087WRP0;REV__A2AT63;REV__A2AT67;REV__A2AT66;REV__A2AT65;REV__A2AT68;REV__A2AT70;REV__F7CR78;REV__E9Q8N1;REV__E9Q8K5;REV__A2ASS6	A2ASS6	Titin	Ttn
1.28905e+09	1.9325e+09	1.36332e+09	35198400000	33381800000	52273900000	27760200000	36973300000	1.52829e+09	37117520000	-	-	27	27	4	86.7	86.7	15.9	42.051	0	323.31	4729600000000	2688	377	42051	P68134	P68134	Actin, alpha skeletal muscle	Acta1
3.23958e+08	5.02063e+08	3.45148e+08	17114500000	14196100000	25302100000	18949800000	23413300000	3.9039e+08	19795160000	-	-	45	45	30	50.9	50.9	34.4	109.42	0	323.31	3307900000000	2026	994	109425	Q8R429;B1ATS4;B1ATS5;E9Q559;Q64518	Q8R429	Sarcoplasmic/endoplasmic reticulum calcium ATPase 1	Atp2a1
1.57275e+08	1.94781e+08	1.61743e+08	8067890000	12243700000	15266700000	11584500000	18805400000	1.71266e+08	13193638000	-	-	151	42	30	68	23.6	17.2	223.22	0	323.31	2667200000000	1605	1942	223219	G3UW82	G3UW82		Myh2
8.59943e+08	1.13436e+09	8.26407e+08	9291860000	8556020000	15557600000	8126070000	10738100000	9.40236e+08	10453930000	-	-	28	28	3	69.7	69.7	14.1	32.68	0	323.31	2221600000000	1070	284	32680.6	P58771;Q8BSH3;E9Q452;E9Q454;Q8BP43;E9Q450;G5E8R0;G5E8R1;E9Q455;E9Q456;E9Q453;G5E8R2;S4R2U0	P58771;Q8BSH3;E9Q452;E9Q454;Q8BP43;E9Q450;G5E8R0;G5E8R1;E9Q455;E9Q456;E9Q453;G5E8R2	Tropomyosin alpha-1 chain	Tpm1
1.79618e+10	2.48061e+10	5.13208e+10	7135690000	7887270000	7317460000	3975790000	6348760000	3.13629e+10	6532994000	-	+	15	15	13	68.7	68.7	57.5	29.114	0	323.31	958120000000	759	NaN	1	sp|P00918ups|CAH2_HUMAN_UPS	sp|P00918ups|CAH2_HUMAN_UPS
4.623e+08	8.15278e+08	4.00483e+08	4689950000	7962150000	6918930000	7640830000	4029640000	5.59354e+08	6248300000	-	-	21	21	4	66.4	66.4	16.8	43.044	0	323.31	1537100000000	803	381	43045	P07310	P07310	Creatine kinase M-type	Ckm
2.70268e+07	3.59441e+07	2.68497e+07	4255750000	4368020000	8582550000	4670120000	6058680000	2.99402e+07	5587024000	-	-	311	311	138	53.8	53.8	22.8	828.65	0	323.31	1688600000000	2526	7152	828662	E9Q1W3;A2AQA9;F6X9B6;A0A1B0GSF5;A0A1B0GSI0;F6RM14;REV__Q8K4L4;B7ZCI2;Q9DC07	E9Q1W3;A2AQA9		Neb
1.73179e+09	3.85257e+09	2.30097e+10	3795740000	6538910000	6328500000	5888390000	3974100000	9.53136e+09	5305128000	-	+	16	16	16	67.3	67.3	67.3	28.739	0	323.31	802780000000	531	NaN	1	sp|P00915ups|CAH1_HUMAN_UPS	sp|P00915ups|CAH1_HUMAN_UPS
1.836e+08	2.30127e+08	1.84329e+08	3888290000	3972450000	5894510000	4249400000	6408180000	1.99352e+08	4882566000	-	-	51	51	34	60.9	60.9	45.5	103.83	0	323.31	1454300000000	1242	894	103834	Q9JI91;D3YY95	Q9JI91	Alpha-actinin-2	Actn2
8.25666e+08	9.7962e+08	8.5201e+08	5501970000	4362450000	4419730000	4722400000	4315600000	8.85765e+08	4664430000	-	-	17	17	3	89.9	89.9	14.2	18.955	0	323.31	1278200000000	897	169	18955.5	P97457;A0A0U1RQ36	P97457;A0A0U1RQ36	Myosin regulatory light chain 2, skeletal muscle isoform	Mylpf
7.83871e+08	6.89944e+08	8.34509e+08	3843230000	3761120000	2924830000	3465030000	3344190000	7.69441e+08	3467680000	-	-	18	18	6	87.2	87.2	34	20.594	0	323.31	1198000000000	590	188	20594.5	P05977;E0CZ30;A0A087WRZ7	P05977;E0CZ30;A0A087WRZ7	Myosin light chain 1/3, skeletal muscle isoform	Myl1
1.09853e+08	1.49136e+08	1.1217e+08	1826410000	2153790000	4408070000	2934690000	3273040000	1.2372e+08	2919200000	-	-	63	63	4	58.1	58.1	3.7	126.2	0	323.31	1089100000000	925	1124	126197	Q6P6L5	Q6P6L5		Mybpc1
3.19182e+08	4.2893e+08	2.5951e+08	3130830000	3321030000	3427040000	2749340000	1624470000	3.35874e+08	2850542000	-	-	18	18	18	60.7	60.7	60.7	38.653	0	323.31	933110000000	312	359	38653.4	A0A0A0MQF6;P16858;S4R1W1;A0A1D5RLD8;S4R257;S4R1W8;V9GX06;S4R1N5;V9GXA7;A0A0R4J0X7;S4R2G5;Q64467;V9GXK0	A0A0A0MQF6;P16858;S4R1W1;A0A1D5RLD8;S4R257	Glyceraldehyde-3-phosphate dehydrogenase	Gapdh;Gm3839
6.62773e+07	7.73005e+07	7.0018e+07	2489380000	1544500000	1414350000	886250000	6846880000	7.11986e+07	2636272000	-	-	113	73	25	56.8	43.9	15.6	222.88	0	323.31	1121600000000	1297	1935	222879	Q91Z83;B8JJH1	Q91Z83	Myosin-7	Myh7
2.47649e+08	4.0319e+08	2.28138e+08	1461510000	2359090000	2989700000	2638080000	1007980000	2.92992e+08	2091272000	-	-	24	24	24	78	78	78	39.355	0	323.31	757330000000	791	364	39355.9	P05064;A6ZI44;D3YWI1;Q9CPQ9;A6ZI46;A0A0U1RPN8;A0A0U1RPT5;D3Z510;D3YV98;A6ZI47;P05063;Q91Y97	P05064;A6ZI44;D3YWI1;Q9CPQ9;A6ZI46;A0A0U1RPN8	Fructose-bisphosphate aldolase A;Fructose-bisphosphate aldolase	Aldoa;Aldoart1
3.73312e+08	6.62786e+08	4.46912e+08	652266000	962621000	1842370000	1262660000	1433830000	4.94337e+08	1230749400	-	-	5	5	1	45.9	45.9	9.6	15.735	0	323.31	584490000000	317	135	15735.2	A2A6K0;P13412;A2A6J8	A2A6K0;P13412;A2A6J8	Troponin I, fast skeletal muscle	Tnni2
3.14773e+08	5.2721e+08	2.68817e+08	894805000	1133920000	1713940000	1479050000	875268000	3.70267e+08	1219396600	-	-	14	14	14	76.5	76.5	76.5	29.366	0	323.31	639090000000	516	260	29366.3	P16015	P16015	Carbonic anhydrase 3	Ca3
8.26301e+07	1.16813e+08	6.39604e+07	684652000	1033770000	1885350000	1354340000	1112820000	8.78012e+07	1214186400	-	-	46	46	38	58.6	58.6	48.6	97.285	0	323.31	581350000000	618	842	97286.3	Q9WUB3;E9PUM3;Q9ET01;Q3UEJ6	Q9WUB3;E9PUM3	Glycogen phosphorylase, muscle form;Alpha-1,4 glucan phosphorylase	Pygm
1.37502e+08	2.66274e+08	1.30005e+08	948612000	1244790000	1578050000	1600750000	685773000	1.77927e+08	1211595000	-	-	17	17	14	53.5	53.5	41	47.024	0	323.31	546620000000	408	434	47024.9	P21550;Q5SX59;J3QPZ9;Q5SX60;Q5SX61	P21550;Q5SX59	Beta-enolase;Enolase	Eno3
1.27243e+08	2.10592e+08	9.87257e+07	940873000	1349790000	839025000	1350490000	613725000	1.4552e+08	1018780600	-	-	29	29	29	61.8	61.8	61.8	57.844	0	323.31	535070000000	414	531	57844.9	P52480;A0A1L1SU37;A0A1L1SQV8;A0A1L1SSN6;A0A1L1STV8;A0A1L1SUV0;A0A1L1ST52;A0A1L1SVH2;E9Q509;G3X925;P53657	P52480	Pyruvate kinase PKM	Pkm
1.60256e+08	2.89556e+08	1.4875e+08	661632000	965527000	1358270000	1082250000	708630000	1.99521e+08	955261800	-	-	16	16	16	55.1	55.1	55.1	33.563	0	323.31	439530000000	129	296	33563.6	A2AEX8;A2AEX6;P97447;A2AEX7;A2AEY1;A2AEY2;A2AEY0;A2AEX9;Q8CDC8	A2AEX8;A2AEX6;P97447;A2AEX7;A2AEY1;A2AEY2	Four and a half LIM domains protein 1	Fhl1
6.78291e+11	1.05055e+12	6.29809e+11	907590000	805176000	1045350000	818584000	990438000	7.86215e+11	913427600	-	+	6	6	3	60.4	60.4	35.4	10.728	0	323.31	290710000000	450	NaN	1	sp|P62988ups|UBIQ_HUMAN_UPS;A0A0A6YW67;E9Q9J0;E9Q4P0;E9Q5F6;E9QNP0;Q5SX22;P62984;P62983;P0CG49;P0CG50	sp|P62988ups|UBIQ_HUMAN_UPS;A0A0A6YW67;E9Q9J0;E9Q4P0;E9Q5F6;E9QNP0;Q5SX22;P62984;P62983;P0CG49;P0CG50	Ubiquitin-60S ribosomal protein L40;Ubiquitin;60S ribosomal protein L40;Ubiquitin-40S ribosomal protein S27a;Ubiquitin;40S ribosomal protein S27a;Polyubiquitin-B;Ubiquitin;Polyubiquitin-C;Ubiquitin;Ubiquitin-related 1;Ubiquitin-related 2	Gm8797;Uba52;Kxd1;Ubc;Ubb;Rps27a
3.47578e+08	5.88524e+08	3.40216e+08	836424000	910124000	929635000	1182120000	614685000	4.25439e+08	894597600	-	-	9	9	9	64.9	64.9	64.9	17.069	0	323.31	471520000000	191	154	17069.7	P04247	P04247	Myoglobin	Mb
3.0743e+09	NaN	5.69885e+09	765237000	706166000	1078340000	756813000	1043250000	4.38658e+09	869961200	-	+	19	19	19	55.4	55.4	55.4	38.814	0	323.31	261660000000	182	NaN	1	sp|P63165ups|SUMO1_HUMAN_UPS;P63166;A0A087WRQ4	sp|P63165ups|SUMO1_HUMAN_UPS
1.62326e+08	2.04239e+08	1.61676e+08	623292000	523209000	1003000000	728361000	1361760000	1.7608e+08	847924400	-	-	32	32	28	71.2	71.2	64	53.497	0	323.31	601410000000	434	469	53497.8	P31001;D3YZ35;A0A0R4J036;P08553	P31001	Desmin	Des
1.84501e+10	6.42601e+09	3.24079e+10	1030870000	894461000	613944000	623023000	598954000	1.90947e+10	752250400	-	+	10	10	8	82.9	82.9	69.9	15.867	0	323.31	236660000000	163	NaN	1	sp|P68871ups|HBB_HUMAN_UPS	sp|P68871ups|HBB_HUMAN_UPS
4.63057e+08	2.32874e+08	4.552e+08	1278810000	1001750000	87438900	1108340000	183133000	3.8371e+08	731894380	-	-	11	11	10	85	85	80.6	18.11	0	323.31	465940000000	295	160	18110	P20801	P20801	Troponin C, skeletal muscle	Tnnc2
1.14819e+09	4.08156e+09	8.08457e+09	598430000	630836000	748930000	541295000	884061000	4.43811e+09	680710400	-	+	25	25	17	56.5	56.5	40.5	59.624	0	323.31	204760000000	255	NaN	1	sp|P04040ups|CATA_HUMAN_UPS	sp|P04040ups|CATA_HUMAN_UPS
1.10132e+08	1.74654e+08	9.98855e+07	544663000	461142000	900217000	599573000	727747000	1.28224e+08	646668400	-	-	11	11	11	38	38	38	46.377	0	323.31	432310000000	306	405	46378	O09165;E9Q489	O09165	Calsequestrin-1	Casq1
8.59443e+07	1.10499e+08	9.26065e+07	501747000	396274000	923958000	542323000	722201000	9.635e+07	617300600	-	-	26	26	26	52.3	52.3	52.3	59.752	0	323.31	419330000000	337	553	59752.6	Q03265;D3Z6F5;D6RJ16	Q03265;D3Z6F5	ATP synthase subunit alpha, mitochondrial;ATP synthase subunit alpha	Atp5a1
1.95567e+07	3.22865e+07	1.60078e+07	334559000	383466000	889579000	685605000	733037000	2.2617e+07	605249200	-	-	110	110	98	54.7	54.7	49.7	291.12	0	323.31	385440000000	829	2726	291119	Q8VHX6;F6XC15	Q8VHX6	Filamin-C	Flnc
1.53325e+08	2.56605e+08	1.80175e+08	375947000	388516000	842607000	463029000	573952000	1.96702e+08	528810200	-	-	12	12	1	36.8	36.8	2.9	28.337	0	323.31	393590000000	443	239	28337	A2A6I8;A2A6J0;A0A0R4J1B1;A2A6J1;A2A6H6;Z4YKH8;Z4YKF8;Z4YKG3;Z4YKE7;Z4YKG8;Z4YJU0;Z4YNB2;J3QP61;Q9QZ47;F6RL36;A2A6J2	A2A6I8;A2A6J0;A0A0R4J1B1;A2A6J1;A2A6H6;Z4YKH8;Z4YKF8;Z4YKG3;Z4YKE7;Z4YKG8;Z4YJU0;Z4YNB2;J3QP61;Q9QZ47;F6RL36;A2A6J2	Troponin T, fast skeletal muscle	Tnnt3
5.14152e+07	6.60134e+07	5.82036e+07	379454000	322068000	735291000	431565000	598859000	5.85441e+07	493447400	-	-	35	35	35	44	44	44	99.183	0	323.31	390720000000	477	910	99184	Q7TQ48	Q7TQ48	Sarcalumenin	Srl
1.72228e+07	2.85895e+07	1.89649e+07	329577000	297203000	721821000	395453000	284387000	2.15924e+07	405688200	-	-	65	5	4	28.6	3.5	3	223.79	0	323.31	332410000000	217	1940	223791	P13541	P13541	Myosin-3	Myh3
4.15264e+07	6.79933e+07	4.48106e+07	270665000	246350000	821718000	293377000	391531000	5.14434e+07	404728200	-	-	50	38	37	60.2	49	48.1	103.04	0	323.31	351930000000	518	900	103043	O88990;D3Z761;D3Z0L8	O88990	Alpha-actinin-3	Actn3
1.5876e+07	1.8958e+07	1.45928e+07	300250000	450484000	406824000	306676000	358388000	1.64756e+07	364524400	-	-	129	31	20	60.7	16.8	12	222.86	0	323.31	326950000000	365	1939	222859	Q5SX39;REV__A0A1L1SRR7;REV__A0A1L1SU70	Q5SX39	Myosin-4	Myh4
7.21528e+06	9.9764e+06	7.58457e+06	261552000	217640000	439387000	323018000	449083000	8.25875e+06	338136000	-	-	185	185	184	43.5	43.5	43.3	534.18	0	323.31	291090000000	813	4691	534188	Q9QXS1;E9Q3W4;F6R059;A0A0R4J218;A0A0R4J223;E9Q9J6;A0A0R4J221;E9PW24;Q8R0W0	Q9QXS1;E9Q3W4	Plectin	Plec
2.95987e+10	5.15686e+10	3.26989e+10	440654000	387802000	263121000	370647000	121196000	3.79554e+10	316684000	-	+	6	6	6	45.1	45.1	45.1	17.052	0	323.31	127620000000	66	NaN	1	sp|P02144ups|MYG_HUMAN_UPS	sp|P02144ups|MYG_HUMAN_UPS
6.05892e+09	2.54739e+09	1.25322e+10	392203000	307951000	197616000	364861000	299375000	7.04618e+09	312401200	-	+	8	8	5	61	61	43.3	15.126	0	224.25	115410000000	103	NaN	1	sp|P69905ups|HBA_HUMAN_UPS	sp|P69905ups|HBA_HUMAN_UPS
5.59584e+07	7.39023e+07	5.93097e+07	205207000	135799000	655860000	201008000	334412000	6.30568e+07	306457200	-	-	24	24	24	71.3	71.3	71.3	56.3	0	323.31	266930000000	457	529	56300.5	P56480	P56480	ATP synthase subunit beta, mitochondrial	Atp5b
1.48784e+07	1.96876e+07	1.29095e+07	291561000	221194000	320740000	332686000	296687000	1.58252e+07	292573600	-	-	118	17	14	53.6	10.1	8.6	222.7	0	323.31	252140000000	383	1937	222708	P13542;Q8BGE8	P13542	Myosin-8	Myh8
1.07945e+08	1.33567e+08	1.07245e+08	184194000	212733000	468607000	201047000	275900000	1.16252e+08	268496200	-	-	17	17	11	61.7	61.7	44	32.904	0	323.31	274780000000	150	298	32904.3	P48962;Q3V132	P48962	ADP/ATP translocase 1	Slc25a4
1.15838e+11	1.39887e+11	1.1173e+11	226324000	188234000	348120000	186143000	344437000	1.22485e+11	258651600	-	+	13	13	4	73.2	73.2	22.7	21.979	0	323.31	117230000000	109	NaN	1	sp|Q06830ups|PRDX1_HUMAN_UPS	sp|Q06830ups|PRDX1_HUMAN_UPS
8.76777e+07	1.57587e+08	8.18693e+07	211081000	329966000	264221000	311615000	158510000	1.09045e+08	255078600	-	-	16	16	16	58.9	58.9	58.9	32.191	0	323.31	221230000000	249	299	32191.8	P17751;H7BXC3	P17751;H7BXC3	Triosephosphate isomerase	Tpi1
1.87324e+07	2.43024e+07	1.83178e+07	138401000	177692000	365957000	209068000	378579000	2.04509e+07	253939400	-	-	68	68	2	46.9	46.9	1	185.46	0	323.31	255160000000	559	1667	185464	Q62234	Q62234	Myomesin-1	Myom1
6.73398e+09	1.26979e+10	1.01737e+10	335112000	246816000	223364000	233012000	122969000	9.86854e+09	232254600	-	+	7	7	7	64.6	64.6	64.6	16.157	0	323.31	114050000000	77	NaN	1	sp|P41159ups|LEP_HUMAN_UPS	sp|P41159ups|LEP_HUMAN_UPS
7.32973e+09	1.28404e+10	1.26527e+10	229866000	159112000	273651000	203185000	243884000	1.09409e+10	221939600	-	+	10	10	10	42.1	42.1	42.1	30.736	0	323.31	110220000000	121	NaN	1	sp|P15559ups|NQO1_HUMAN_UPS;Q64669	sp|P15559ups|NQO1_HUMAN_UPS
1.73025e+08	1.47482e+08	1.76099e+08	151120000	199823000	130034000	183672000	262189000	1.65535e+08	185367600	-	-	19	19	19	81.2	81.2	81.2	22.749	0	323.31	231820000000	275	207	22748.9	Q8CI43;A0A1W2P6G5;A0A1W2P6F6;A0A1W2P7Q9;Q60605	Q8CI43	Myosin light chain 6B	Myl6b
4.72843e+07	5.32073e+07	4.66144e+07	204045000	184986000	179687000	172901000	183696000	4.90353e+07	185063000	-	-	20	20	20	36.1	36.1	36.1	72.312	0	323.31	231670000000	238	679	72312.3	E9PYJ9;Q9JKS4	E9PYJ9;Q9JKS4	LIM domain-binding protein 3	Ldb3
1.01567e+08	1.41137e+08	1.25427e+08	91640900	123095000	255832000	162721000	223895000	1.22711e+08	171436780	-	-	11	11	11	68.7	68.7	68.7	23.793	0	323.31	189800000000	192	214	23793	Q9CRA2;D9J303;F8WJI6;E9Q8P5;D9J2Z9;D9J300;D9J301;D9J302;Q8CI51;A0A0G2JEJ0	Q9CRA2;D9J303;F8WJI6;E9Q8P5;D9J2Z9;D9J300;D9J301;D9J302;Q8CI51	PDZ and LIM domain protein 5	Pdlim5
NaN	NaN	NaN	119351000	168975000	127025000	166851000	160053000	NaN	148451000	-	+	2	2	2	32.4	32.4	32.4	8.2736	0	16.762	81775000000	9	NaN	1	sp|P01031ups|CO5_HUMAN_UPS	sp|P01031ups|CO5_HUMAN_UPS
7.6386e+07	1.01469e+08	8.37867e+07	114225000	104120000	202407000	146207000	140536000	8.7214e+07	141499000	-	-	14	14	14	74	74	74	31.457	0	323.31	180370000000	225	296	31457.3	Q9JK37	Q9JK37	Myozenin-1	Myoz1
1.19672e+08	1.79172e+08	9.84181e+07	115084000	188613000	68592600	225191000	68614100	1.32421e+08	133218940	-	-	12	12	12	65.5	65.5	65.5	21.539	0	323.31	163570000000	128	194	21539.6	Q9R0Y5;A0A0A6YXW8;Z4YN97	Q9R0Y5;A0A0A6YXW8	Adenylate kinase isoenzyme 1	Ak1
2.92289e+07	3.74836e+07	2.00459e+07	69198700	55121800	183400000	159972000	165315000	2.89194e+07	126601500	-	-	29	29	29	53.7	53.7	53.7	85.462	0	323.31	172950000000	339	780	85463.5	Q99KI0	Q99KI0	Aconitate hydratase, mitochondrial	Aco2
5.75519e+07	6.70821e+07	4.67892e+07	132046000	95652600	108006000	157060000	138544000	5.71411e+07	126261720	-	-	16	16	16	60.1	60.1	60.1	35.611	0	323.31	156740000000	183	338	35611.4	P08249;A0A0G2JF23;A0A0G2JGY4	P08249	Malate dehydrogenase, mitochondrial	Mdh2
5.13143e+07	8.97446e+07	4.13296e+07	77001900	145949000	154716000	159863000	77279200	6.07962e+07	122961820	-	-	19	19	19	58.3	58.3	58.3	44.55	0	323.31	153570000000	213	417	44550.5	P09411;S4R2M7;P09041	P09411;S4R2M7	Phosphoglycerate kinase 1;Phosphoglycerate kinase	Pgk1
1.35638e+07	1.94251e+07	1.30728e+07	73401700	65705600	191010000	132586000	140173000	1.53539e+07	120575260	-	-	53	53	53	47.9	47.9	47.9	161.78	0	323.31	164870000000	400	1439	161778	A2ABU4	A2ABU4	Myomesin-3	Myom3
2.4763e+07	2.27718e+07	2.07814e+07	90460400	87043600	137492000	114153000	137083000	2.27721e+07	113246400	-	-	37	37	23	42.3	42.3	24	112.22	0	323.31	173520000000	288	1020	112217	Q6PIE5;D3YYN7;A0A0G2JGX4;Q8VCE0;Q6PIC6;Q9WV27;Q9Z1W8;Q91WH7;E9QNX7;Q64436	Q6PIE5;D3YYN7	Sodium/potassium-transporting ATPase subunit alpha-2	Atp1a2
4.68181e+07	9.06388e+07	4.55414e+07	72176100	108201000	114037000	149680000	65415100	6.09994e+07	101901840	-	-	10	10	9	33.1	33.1	29.5	36.498	0	323.31	135140000000	154	332	36498.5	Q564E2;A0A1B0GSX0;P06151;A0A1B0GSR9;D3YZQ9;A0A1B0GT41;A0A1B0GQX5;A0A1B0GSL7;A0A1B0GRW9;A0A1B0GS79;A0A1B0GRC1;A0A1B0GRS2;D3YVR7;D3YZE4;P00342;A0A1B0GSR2;A0A0N4SVV8;A0A1B0GRE9	Q564E2;A0A1B0GSX0;P06151;A0A1B0GSR9;D3YZQ9;A0A1B0GT41;A0A1B0GQX5;A0A1B0GSL7	L-lactate dehydrogenase;L-lactate dehydrogenase A chain	Ldha
3.2398e+07	4.00963e+07	2.56493e+07	65266700	77338700	115046000	109309000	101446000	3.27145e+07	93681280	-	-	25	25	1	43.3	43.3	2.8	70.87	0	323.31	141790000000	200	646	70871.1	P63017;D3Z5E2	P63017	Heat shock cognate 71 kDa protein	Hspa8
2.26731e+06	2.94148e+06	2.1697e+06	70944500	70107300	114292000	72135500	117055000	2.4595e+06	88906860	-	-	99	99	0	21.4	21.4	0	874.53	0	323.31	142370000000	390	8032	874539	H7BX05;F6TJX7;F6X8F4;F7DCJ0	H7BX05		Obscn
2.92004e+07	4.70746e+07	2.34941e+07	36219900	64757600	128974000	162283000	49696100	3.32564e+07	88386120	-	-	27	27	27	46.9	46.9	46.9	85.268	0	323.31	147980000000	226	780	85268.7	P47857;P12382;Q8C605;Q9WUA3	P47857	ATP-dependent 6-phosphofructokinase, muscle type	Pfkm
3.25702e+06	4.64029e+06	3.52901e+06	63441200	48709500	129645000	90441600	103360000	3.80878e+06	87119460	-	-	90	90	90	22.5	22.5	22.5	565.03	0	323.31	142900000000	497	5035	565039	E9PZQ0;K3W4M2;A0A1L1SQG7;A0A140LJF7;A0A140LJK7;E9PW34;A2AGL3;F6U7V1;E9Q401	E9PZQ0;K3W4M2;A0A1L1SQG7	Ryanodine receptor 1	Ryr1
NaN	NaN	3.20888e+09	91840800	79223100	18167600	102258000	107606000	3.20888e+09	79819100	-	+	4	4	4	40.7	40.7	40.7	16.153	0	231.45	52541000000	65	NaN	1	sp|P00167ups|CYB5_HUMAN_UPS;G5E850;P56395;E0CY88	sp|P00167ups|CYB5_HUMAN_UPS;G5E850;P56395	Cytochrome b5	Cyb5a
6.20176e+07	1.14259e+08	5.79171e+07	71507700	89843400	88490900	100695000	35508600	7.80647e+07	77209120	-	-	14	14	14	56.9	56.9	56.9	28.827	0	323.31	125950000000	220	253	28827.1	O70250;Q9DBJ1	O70250	Phosphoglycerate mutase 2	Pgam2
2.50051e+07	3.2087e+07	2.18485e+07	33807300	53972400	128532000	70689700	81464200	2.63136e+07	73693120	-	-	13	13	13	17.5	17.5	17.5	77.843	0	142.07	133190000000	126	693	77843.6	E9Q9K5;A0A1W2P7C3;A0A1W2P8G7;A0A1W2P6F3	E9Q9K5	Triadin	Trdn
2.77885e+07	3.58768e+07	2.44986e+07	40628500	30510400	86348700	57864200	99258800	2.93879e+07	62922120	-	-	15	15	15	42.2	42.2	42.2	47.473	0	323.31	100010000000	159	419	47473.3	Q6P8J7;P30275	Q6P8J7	Creatine kinase S-type, mitochondrial	Ckmt2
9.32971e+10	9.919e+10	8.25715e+10	43767900	43865000	77900900	67947100	79050600	9.16862e+10	62506300	-	+	7	7	2	44.3	44.3	17.3	20.176	0	106.44	54714000000	68	NaN	1	sp|P62937ups|PPIA_HUMAN_UPS;A0A1L1SST0;F8VPN3;V9GXC1;V9GX31	sp|P62937ups|PPIA_HUMAN_UPS;A0A1L1SST0
9.00291e+07	8.03252e+07	9.31466e+07	14177300	28248400	40610700	81674500	113620000	8.78336e+07	55666180	+	-	5	5	1	42	42	5.6	15.142	0	323.31	124680000000	54	143	15142.6	P27661	P27661	Histone H2AX	H2afx
5.70187e+07	8.98487e+07	5.64959e+07	20919100	35397600	74240200	57477800	83393300	6.77877e+07	54285600	+	-	7	7	7	49.3	49.3	49.3	14.888	0	323.31	126170000000	102	134	14888.2	Q8CBB6;Q8CGP2;Q8CGP1;Q64475;P10853;Q6ZWY9;Q64525;Q64478;P10854;Q9D2U9;Q8CGP0;P70696;Q64524	Q8CBB6;Q8CGP2;Q8CGP1;Q64475;P10853;Q6ZWY9;Q64525;Q64478;P10854;Q9D2U9;Q8CGP0;P70696;Q64524	Histone H2B;Histone H2B type 1-P;Histone H2B type 1-K;Histone H2B type 1-B;Histone H2B type 1-F/J/L;Histone H2B type 1-C/E/G;Histone H2B type 2-B;Histone H2B type 1-H;Histone H2B type 1-M;Histone H2B type 3-A;Histone H2B type 3-B;Histone H2B type 1-A;Histone H2B type 2-E	Hist1h2br;Hist1h2bp;Hist1h2bk;Hist1h2bb;Hist1h2bf;Hist1h2bc;Hist2h2bb;Hist1h2bh;Hist1h2bm;Hist3h2ba;Hist3h2bb;Hist1h2ba;Hist2h2be
2.49718e+07	2.89038e+07	2.41013e+07	36904300	30204300	80487900	49280000	72262100	2.59923e+07	53827720	-	-	21	21	21	50	50	50	55.316	0	323.31	92442000000	136	496	55316.3	Q9JIF9	Q9JIF9	Myotilin	Myot
5.39591e+07	6.33537e+07	6.16106e+07	31120800	20303300	49446400	18448000	85907200	5.96411e+07	41045140	-	-	9	9	9	44.4	44.4	44.4	19.843	0	240.37	81215000000	101	171	19843.1	D3YUN3;F6QC77;Q9WUZ5;D3YTL4	D3YUN3;F6QC77;Q9WUZ5	Troponin I, slow skeletal muscle	Tnni1
1.77563e+07	2.99093e+07	1.21794e+07	17848700	28846400	46279500	73013900	27629800	1.99483e+07	38723660	-	-	13	13	6	35.6	35.6	21.6	50.454	0	323.31	66532000000	143	463	50454.2	P62631	P62631	Elongation factor 1-alpha 2	Eef1a2
1.24093e+08	1.01303e+08	1.22419e+08	48380700	68814200	11506100	55144700	3798460	1.15939e+08	37528832	-	-	9	9	9	80	80	80	11.93	0	323.31	79998000000	62	110	11930.5	P32848	P32848	Parvalbumin alpha	Pvalb
3.06709e+07	4.08726e+07	3.3417e+07	24314800	14051300	63319200	32781500	46189100	3.49868e+07	36131180	-	-	14	14	3	63.2	63.2	12.8	32.351	0	323.31	77672000000	140	296	32351.5	Q60932	Q60932	Voltage-dependent anion-selective channel protein 1	Vdac1
2.08898e+07	3.09076e+07	1.48608e+07	15984200	28384300	47544400	62294600	16274200	2.22194e+07	34096340	-	-	16	16	16	33.7	33.7	33.7	62.766	0	323.31	75331000000	119	558	62766.9	P06745;CON__Q3ZBD7;A0A0U1RQ72;A0A0U1RP97;A0A0U1RQ18	P06745	Glucose-6-phosphate isomerase	Gpi
3.6719e+07	4.76306e+07	2.80196e+07	19009200	22168000	43502900	44233400	35973000	3.74564e+07	32977300	-	-	14	14	12	57.3	57.3	51.4	29.174	0	323.31	68455000000	78	255	29173.9	P62259;D6REF3;F6WA09;F6YY69;F6VW30;P68254;D3YW45	P62259;D6REF3;F6WA09	14-3-3 protein epsilon	Ywhae
2.04042e+07	2.4105e+07	1.50752e+07	27049400	18926000	45013600	28767800	45105200	1.98615e+07	32972400	-	-	17	17	17	42.8	42.8	42.8	47.411	0	323.31	71014000000	164	430	47411.4	P05202	P05202	Aspartate aminotransferase, mitochondrial	Got2
3.27726e+07	2.8992e+07	3.94795e+07	23886800	25028800	34628500	18001900	45339200	3.3748e+07	29377040	-	-	8	8	8	29.6	29.6	29.6	30.255	0	287.91	71055000000	81	274	30255.8	Q8C2Q8;A2AKU9;Q91VR2;A2AKV1;A2AKV2;A2AKV3;A2AKV0	Q8C2Q8;A2AKU9;Q91VR2;A2AKV1;A2AKV2;A2AKV3	ATP synthase subunit gamma;ATP synthase subunit gamma, mitochondrial	Atp5c1
5.98912e+06	6.51518e+06	9.03081e+06	18684900	24281400	12849600	67290600	14564400	7.17837e+06	27534180	-	-	5	1	1	7.2	1.5	1.5	62.844	0	12.73	60182000000	43	594	62844.6	Q3UV17;Q99M73	Q3UV17	Keratin, type II cytoskeletal 2 oral	Krt76
2.05893e+07	2.80609e+07	1.9429e+07	13767500	26643400	30452400	35872600	28975100	2.2693e+07	27142200	-	-	12	12	12	46.7	46.7	46.7	39.288	0	323.31	56118000000	80	364	39288.5	A0A1B0GSX6;O70209	A0A1B0GSX6;O70209	PDZ and LIM domain protein 3	Pdlim3
6.69382e+06	1.39056e+07	4.74577e+06	10273800	14761400	59029000	23271600	23824600	8.44839e+06	26232080	-	-	21	21	17	36.9	36.9	28.2	86.104	0	323.31	46955000000	134	745	86105.3	Q3V1D3;A0A0G2JFD4;H3BIY4;A0A1L1SRX2;O08739	Q3V1D3;A0A0G2JFD4	AMP deaminase 1	Ampd1
1.12239e+07	2.20861e+07	1.16254e+07	2236390	12776300	47434800	45720300	22848200	1.49785e+07	26203198	-	-	18	16	16	34.4	30.2	30.2	72.421	0	285.11	59877000000	71	655	72422.1	P20029	P20029	78 kDa glucose-regulated protein	Hspa5
1.77687e+07	3.42642e+07	1.51073e+07	14372900	29534900	28137400	40551000	14890700	2.23801e+07	25497380	-	-	23	23	3	46.8	46.8	5.2	61.417	0	219.91	69535000000	138	562	61418.2	Q9D0F9	Q9D0F9	Phosphoglucomutase-1	Pgm1
5.09409e+07	6.02886e+07	4.88933e+07	22657800	13728700	30590500	29211400	30964200	5.33743e+07	25430520	-	-	4	3	3	17.1	8.2	8.2	16.81	0	323.31	64535000000	116	146	16810.7	F6RQN3	F6RQN3		Atp2a1
6.93568e+07	4.24304e+07	4.87313e+07	47348700	14564400	2824920	16112200	46072900	5.35062e+07	25384624	-	-	10	10	4	66.9	66.9	33.1	18.864	0	323.31	68961000000	103	166	18864.4	P51667;E9Q8Y0;F6RBQ5	P51667;E9Q8Y0;F6RBQ5	Myosin regulatory light chain 2, ventricular/cardiac muscle isoform	Myl2
9.593e+06	1.1666e+07	1.01675e+07	17370200	14862600	21207100	21858800	50676900	1.04755e+07	25195120	-	-	28	28	27	44.1	44.1	42.9	74.237	0	323.31	55926000000	148	665	74237.6	P48678;D3YUF7	P48678	Prelamin-A/C;Lamin-A/C	Lmna
NaN	NaN	NaN	NaN	NaN	NaN	NaN	25140100	NaN	25140100	-	-	1	1	1	0.3	0.3	0.3	234.22	0	9.2364	18600000000	6	2124	234224	A0A1D5RM41;A0A0A6YXX3;A0A0A6YXL6;E9Q3Y4;Q9ESE1	A0A1D5RM41;A0A0A6YXX3;A0A0A6YXL6;E9Q3Y4;Q9ESE1	Lipopolysaccharide-responsive and beige-like anchor protein	Lrba
2.58535e+06	3.53208e+06	2.47833e+06	14255400	11045700	35489600	25192000	34601300	2.86525e+06	24116800	-	-	137	12	11	51.4	4.3	4	353.16	0	148.4	63792000000	107	3044	353166	A2AQB2	A2AQB2		Neb
1.68136e+07	2.07684e+07	1.71611e+07	15274400	9091890	45989400	20824400	26979900	1.82477e+07	23631998	-	-	14	14	14	39.3	39.3	39.3	48.234	0	323.31	62522000000	104	453	48234.9	Q9DB77;A0A140LI98	Q9DB77	Cytochrome b-c1 complex subunit 2, mitochondrial	Uqcrc2
2.76285e+06	3.5365e+06	2.87103e+06	9909620	12316200	38326000	25706200	31869100	3.05679e+06	23625424	-	-	1	1	1	0.6	0.6	0.6	266.7	0.0038023	1.6397	53407000000	0	2430	266705	Q3UHF7	Q3UHF7	Transcription factor HIVEP2	Hivep2
2.54268e+07	3.01407e+07	2.97948e+07	7427530	27435000	31544200	11620000	39142000	2.84541e+07	23433746	-	-	19	8	3	53.5	28.2	11.6	32.862	0	323.31	65150000000	123	284	32862.8	A0A0R4J1P2;P21107;E9Q5J9;D3YVR0	A0A0R4J1P2;P21107;E9Q5J9	Tropomyosin alpha-3 chain	Tpm3
1.24335e+07	1.72836e+07	9.83535e+06	15454300	9284020	35364000	25492200	23410800	1.31841e+07	21801064	-	-	17	17	17	38.3	38.3	38.3	68.189	0	323.31	55057000000	129	606	68190.3	A2AUC9;REV__Q80VM7	A2AUC9	Kelch-like protein 41	Klhl41
1.23229e+07	2.05482e+07	1.64212e+07	13286500	15725800	29268900	23138800	20635800	1.64308e+07	20411160	-	-	14	14	14	42.6	42.6	42.6	52.763	0	323.31	53272000000	77	477	52764.1	Q6P1B9;O08539;S4R2J8;S4R1B8;S4R270;A0A0G2JEG8;D3Z6Q9;Q7TQF7	Q6P1B9;O08539	Myc box-dependent-interacting protein 1	Bin1
1.85885e+07	2.441e+07	NaN	4566600	9877100	34071700	23803100	19994900	2.14992e+07	18462680	-	-	1	1	1	4.6	4.6	4.6	36.907	0.0028409	2.3134	39960000000	4	325	36907	Q8BRB6;A0A0J9YV32;Q3UUG6	Q8BRB6;A0A0J9YV32;Q3UUG6	TBC1 domain family member 24	Tbc1d24
1.4151e+07	9.07123e+06	1.58482e+07	31011000	1887000	24591500	24617400	8986240	1.30235e+07	18218628	+	-	7	7	2	30.2	30.2	7.1	21.266	0	16.984	34082000000	40	212	21266.7	P15864	P15864	Histone H1.2	Hist1h1c
1.32322e+07	1.87412e+07	1.07428e+07	9342960	13844200	27791900	23775500	11416300	1.42387e+07	17234172	-	-	15	15	15	47	47	47	50.254	0	323.31	45333000000	129	457	50254.4	P28650;J3QN31	P28650;J3QN31	Adenylosuccinate synthetase isozyme 1	Adssl1
3.61046e+06	4.62914e+06	4.43364e+06	594952	19368700	25391200	31678800	1799850	4.22441e+06	1.57667e+07	-	-	31	31	30	17.4	17.4	17	268.09	0	143.24	49981000000	121	2329	268091	Q3UGX2;E9Q397;P15508	Q3UGX2;E9Q397;P15508	Spectrin beta chain, erythrocytic	Sptb
5.20073e+07	2.64814e+07	6.2067e+07	19887500	13739500	6548410	12829900	25547300	4.68519e+07	15710522	-	-	11	9	8	66.7	56.9	51.5	22.421	0	323.31	60826000000	99	204	22421.6	P09542;A0A0G2JDW2;A0A0G2JDM3	P09542;A0A0G2JDW2;A0A0G2JDM3	Myosin light chain 3	Myl3
9.61271e+06	1.32214e+07	9.28406e+06	8312650	6496410	25189500	13177600	21412600	1.07061e+07	14917752	-	-	10	10	10	23.7	23.7	23.7	51.736	0	62.315	42103000000	63	464	51736.7	Q9CZU6;Q80X68	Q9CZU6;Q80X68	Citrate synthase, mitochondrial;Citrate synthase	Cs;Csl
2.07493e+07	3.24749e+07	1.70288e+07	10408800	14655900	25500100	14079400	9539060	2.34177e+07	14836652	-	-	8	8	8	26.3	26.3	26.3	36.511	0	68.19	43328000000	65	334	36511.2	P14152;B1ATQ3	P14152	Malate dehydrogenase, cytoplasmic	Mdh1
4.77156e+09	4.45098e+09	7.96057e+09	10439700	11875900	20763600	11913100	16982700	5.7277e+09	14395000	-	+	15	15	15	36.7	36.7	36.7	58.233	0	323.31	20421000000	70	NaN	1	sp|P12081ups|SYHC_HUMAN_UPS;Q61035;G5E823;Q99KK9	sp|P12081ups|SYHC_HUMAN_UPS;Q61035	Histidine--tRNA ligase, cytoplasmic	Hars
3.24771e+07	4.414e+07	2.52527e+07	13301600	12655800	16005800	15849200	9613120	3.39566e+07	13485104	-	-	9	9	8	57.8	57.8	51.2	18.709	0	258.83	37514000000	63	166	18709.6	P45591	P45591	Cofilin-2	Cfl2
4.30918e+07	2.82309e+07	3.03422e+07	3404570	1379250	12320200	9990840	35782500	3.38883e+07	12575472	+	-	6	6	6	46.6	46.6	46.6	11.367	0	58.69	63025000000	92	103	11367.3	P62806	P62806	Histone H4	Hist1h4a
8.20865e+06	8.95757e+06	8.56502e+06	9421540	6432590	9028220	14606000	22671800	8.57708e+06	12432030	-	-	19	19	16	33.5	33.5	29.2	74.569	0	240.97	45349000000	132	677	74569.6	Q8BH59;V9GXX9	Q8BH59	Calcium-binding mitochondrial carrier protein Aralar1	Slc25a12
1.40337e+07	1.56761e+07	1.35295e+07	5968600	6335490	19276000	14382200	15824600	1.44131e+07	12357378	-	-	7	7	7	25	25	25	28.948	0	59.3	39880000000	68	256	28948.8	Q9CQQ7;A0A0G2JGX3	Q9CQQ7;A0A0G2JGX3	ATP synthase F(0) complex subunit B1, mitochondrial	Atp5f1
6.9603e+07	8.54459e+07	5.53261e+07	7399560	10603600	9392450	18382100	15157800	7.0125e+07	12187102	-	-	8	8	8	51.4	51.4	51.4	20.069	0	323.31	67117000000	76	175	20068.8	P23927;A0A1L1SRG5	P23927;A0A1L1SRG5	Alpha-crystallin B chain	Cryab
1.7976e+07	2.6116e+07	1.50064e+07	10985600	10475500	17976600	11061400	10070600	1.96994e+07	12113940	-	-	11	9	7	43.3	37.2	29.6	28.302	0	323.31	34717000000	47	247	28302.6	P61982	P61982	14-3-3 protein gamma;14-3-3 protein gamma, N-terminally processed	Ywhag
2.45419e+07	NaN	1.92968e+07	3834680	16546700	NaN	24625600	3156170	2.19194e+07	1.20408e+07	-	-	1	1	1	6.3	6.3	6.3	29.222	0	6.4052	30050000000	10	255	29222	A0A1N9M8A6;Q9CXV9	A0A1N9M8A6;Q9CXV9	DCN1-like protein 5	Dcun1d5
5.06445e+06	5.6941e+06	4.61496e+06	9056000	5264590	15149500	11250300	18818500	5.1245e+06	11907778	-	-	24	24	24	32.6	32.6	32.6	116.45	0	323.31	40456000000	180	1023	116449	Q60597;Z4YJV4;E9Q7L0	Q60597;Z4YJV4	2-oxoglutarate dehydrogenase, mitochondrial	Ogdh
8.16001e+06	1.42198e+07	6.96915e+06	6846210	6800220	15101100	23036200	7075030	9.783e+06	11771752	-	-	16	16	4	43.2	43.2	11.3	52.793	0	323.31	34376000000	108	477	52793.5	A0A0A0MQA5;P68368;A0A087WQS4;A0A087WRB4;A0A087WSB0;A0A087WSL5;A0A087WS35	A0A0A0MQA5;P68368	Tubulin alpha-4A chain	Tuba4a
NaN	NaN	NaN	6458070	6723730	11742200	12213100	20732700	NaN	11573960	-	-	10	2	2	19.7	3.8	3.8	59.795	0	77.977	15329000000	26	527	59795.3	P24270;A2AL20	P24270	Catalase	Cat
1.68875e+07	2.35694e+07	1.58916e+07	9434100	9756590	6106130	23659400	7050760	1.87829e+07	11201396	-	-	7	7	4	39.3	39.3	14.6	30.2	0	84.407	33752000000	52	267	30200	E9PZF0;Q01768;Q5NC79	E9PZF0;Q01768	Nucleoside diphosphate kinase;Nucleoside diphosphate kinase B	Gm20390;Nme2
2.36831e+07	4.08723e+07	1.3342e+07	3477170	7111210	9777080	18296100	16577700	2.59658e+07	11047852	-	-	8	8	8	56.7	56.7	56.7	20.895	0	323.31	31355000000	63	194	20894.8	P50462;A0A140LHC6	P50462	Cysteine and glycine-rich protein 3	Csrp3
1.72047e+07	1.76953e+07	1.53444e+07	9512420	5599890	11813400	14563500	13417800	1.67481e+07	10981402	-	-	9	9	9	25.8	25.8	25.8	41.52	0	190.73	44657000000	87	384	41519.9	A0A1L1STE6;Q9D6R2	A0A1L1STE6;Q9D6R2	Isocitrate dehydrogenase [NAD] subunit alpha, mitochondrial	Idh3a
2.06776e+07	1.19767e+07	1.58797e+07	14166500	4520740	1781440	9484220	24780200	1.6178e+07	10946620	-	-	8	8	8	32.2	32.2	32.2	30.695	0	178.85	32889000000	39	283	30695.6	A0A140T8V3;J3QMG3;Q60931	A0A140T8V3;J3QMG3;Q60931	Voltage-dependent anion-selective channel protein 3	Vdac3
7.33107e+06	7.17156e+06	6.40162e+06	5126290	6118800	11024400	11331600	20918100	6.96808e+06	10903838	-	-	24	24	24	39.3	39.3	39.3	75.6	0	323.31	39164000000	106	679	75601.1	E9Q800;Q8CAQ8;E9QAY6;A0A0U1RP81;A0A0U1RQ14;A0A1B0GX08;E9PVS5;A0A0U1RNN9	E9Q800;Q8CAQ8;E9QAY6;A0A0U1RP81	MICOS complex subunit Mic60	Immt
7.32207e+06	8.08818e+06	6.72794e+06	6730250	3798410	13150700	13133200	17620500	7.3794e+06	10886612	-	-	12	12	12	19.7	19.7	19.7	72.585	0	231.21	37634000000	55	664	72585.4	Q8K2B3	Q8K2B3	Succinate dehydrogenase [ubiquinone] flavoprotein subunit, mitochondrial	Sdha
9.54236e+06	1.13656e+07	8.98275e+06	3431860	4598310	19130300	9898390	16905100	9.96358e+06	10792792	-	-	11	11	11	30.8	30.8	30.8	43.231	0	168.49	31859000000	73	390	43231.6	P35486	P35486	Pyruvate dehydrogenase E1 component subunit alpha, somatic form, mitochondrial	Pdha1
1.63673e+06	1.97792e+06	1.2375e+06	7964750	6808360	16999800	9459460	11891100	1.61738e+06	10624694	-	-	58	58	58	20.1	20.1	20.1	425.83	0	323.31	40270000000	228	3678	425832	P11531;A2A9Z1;A2A9Z2;A0A1W2P7C0;Q61636;E9Q6R7	P11531	Dystrophin	Dmd
4.00188e+06	5.72724e+06	4.39234e+06	7273220	5433790	14985700	10148000	15232200	4.70715e+06	10614582	-	-	6	6	6	5.9	5.9	5.9	126.61	0	153.51	39802000000	35	1162	126613	Q99P72;Q8BH78;Q8BHF5	Q99P72;Q8BH78;Q8BHF5	Reticulon-4;Reticulon	Rtn4
9.10056e+06	1.47518e+07	9.78632e+06	5309250	4543830	28127500	7402520	7316100	1.12129e+07	10539840	-	-	16	13	8	55.3	42.9	26.3	47.14	0	147.54	34884000000	69	434	47140.8	P17182;Q6PHC1;B1ARR7;D3Z6E4;A0A0N4SUX5;P17183;A0A0N4SUI6;B1ARR6;D3YVD3;D3Z2S4;A0A0N4SUW8	P17182;Q6PHC1	Alpha-enolase	Eno1
4.66301e+06	7.4846e+06	5.71429e+06	4273130	2720590	22197900	8437980	14297700	5.95397e+06	10385460	-	-	20	20	20	32.5	32.5	32.5	79.776	0	260.44	34029000000	153	727	79776.8	Q91VD9;A0A087WSU3;A0A087WQ77;A0A087WQR0;A0A087WR47;A0A087WP77	Q91VD9	NADH-ubiquinone oxidoreductase 75 kDa subunit, mitochondrial	Ndufs1
6.64475e+06	1.89061e+07	1.03771e+07	11031800	17633000	5068880	2335700	15248500	1.1976e+07	10263576	-	-	2	2	2	8.1	8.1	8.1	26.221	0	19.806	33680000000	24	246	26220.9	Q792Z1	Q792Z1		Try10
1.21038e+07	1.45228e+07	8.63981e+06	5413330	7730160	12124600	16340900	9520920	1.17555e+07	10225982	-	-	14	14	3	41.8	41.8	12.1	49.83	0	323.31	34826000000	167	445	49831	P68372;Q9D6F9;Q922F4	P68372;Q9D6F9	Tubulin beta-4B chain;Tubulin beta-4A chain	Tubb4b;Tubb4a
1.76078e+07	2.2579e+07	1.47348e+07	9341270	8768450	5035830	22857200	4608900	1.83072e+07	10122330	-	-	9	9	9	28.8	28.8	28.8	40.789	0	323.31	38566000000	99	371	40789.2	Q9QYG0	Q9QYG0	Protein NDRG2	Ndrg2
1.12753e+06	1.33583e+06	1.30521e+06	7985550	7901210	14728400	8177400	10653800	1.25619e+06	9889272	-	-	48	48	48	18.3	18.3	18.3	343.81	0	323.31	35108000000	159	3118	343815	Q60675;A0A087WRP2;A0A1W2P7N3;F8VQ40;P19137	Q60675	Laminin subunit alpha-2	Lama2
1.12626e+07	1.31158e+07	1.23085e+07	6149550	3695830	16386900	11103100	11529100	1.2229e+07	9772896	-	-	7	7	7	19	19	19	39.736	0	31.911	30415000000	55	358	39736.4	G5E902;Q8VEM8	G5E902;Q8VEM8	Phosphate carrier protein, mitochondrial	Slc25a3
6.73109e+06	9.79675e+06	5.32452e+06	5549050	7797470	9574880	13688700	9771050	7.28412e+06	9276230	-	-	23	23	14	40.2	40.2	28.2	83.28	0	323.31	36239000000	99	724	83281.2	P11499;E9Q3D6;E9PX27;E9Q0C3;D3Z1R1;B7ZC50;A2A6A2;B7ZC49;REV__Q8BL66	P11499	Heat shock protein HSP 90-beta	Hsp90ab1
3.26709e+07	2.59542e+07	2.41969e+07	10147100	16149200	1857810	12865400	5105280	2.76073e+07	9224958	-	-	6	6	6	42.9	42.9	42.9	15.942	0	37.98	27713000000	27	154	15942.7	P08228	P08228	Superoxide dismutase [Cu-Zn]	Sod1
2.58346e+07	3.22538e+07	2.77929e+07	8770970	13420500	5878080	10754300	4799930	2.86271e+07	8724756	-	-	9	9	9	53.1	53.1	53.1	23.014	0	323.31	34180000000	132	209	23013.8	P14602;D3YZ06	P14602;D3YZ06	Heat shock protein beta-1	Hspb1
4.76585e+06	5.53237e+06	4.72904e+06	3880450	2797780	22470400	6085440	7541280	5.00909e+06	8555070	-	-	13	13	13	27.3	27.3	27.3	67.941	0	273.9	25833000000	83	642	67941.7	Q8BMF4	Q8BMF4	Dihydrolipoyllysine-residue acetyltransferase component of pyruvate dehydrogenase complex, mitochondrial	Dlat
6.4063e+07	1.76633e+07	3.10567e+07	10706700	7652000	2305340	13576800	7853780	3.75943e+07	8418924	-	-	6	6	6	50.9	50.9	50.9	18.42	0	323.31	43225000000	82	161	18420.5	P19123;E9Q8P0	P19123;E9Q8P0	Troponin C, slow skeletal and cardiac muscles	Tnnc1
7.16454e+06	9.41876e+06	5.50669e+06	5606320	3303590	15374700	7169910	9173370	7.36333e+06	8125578	-	-	13	13	13	32.5	32.5	32.5	54.356	0	222.99	27333000000	70	507	54356.7	P97807	P97807	Fumarate hydratase, mitochondrial	Fh
2.28319e+07	1.33979e+07	1.0989e+07	2091970	6998340	10782400	10825000	9500840	1.57396e+07	8039710	-	-	9	9	9	30.3	30.3	30.3	35.194	0	118.4	36798000000	45	304	35194.6	P14094;A0A0A6YX05	P14094;A0A0A6YX05	Sodium/potassium-transporting ATPase subunit beta-1	Atp1b1
4.44912e+06	7.14029e+06	3.96338e+06	5849020	7028920	9518930	10536200	7153300	5.18426e+06	8017274	-	-	18	18	18	30.3	30.3	30.3	89.321	0	323.31	26884000000	106	806	89321.8	Q01853	Q01853	Transitional endoplasmic reticulum ATPase	Vcp
5.73865e+06	9.58098e+06	5.0754e+06	4678770	6477620	8834310	12684500	7308490	6.79835e+06	7996738	-	-	21	21	21	38.3	38.3	38.3	75.884	0	323.31	32459000000	129	673	75885.3	P14824;F8WIT2	P14824;F8WIT2	Annexin A6;Annexin	Anxa6
2.68297e+06	3.17156e+06	1.89966e+06	3684200	6679910	11894700	10317200	7066360	2.58473e+06	7928474	-	-	41	41	41	26.9	26.9	26.9	220.5	0	323.31	31300000000	124	2187	220499	P70670;Q60817	P70670	Nascent polypeptide-associated complex subunit alpha, muscle-specific form	Naca
1.0359e+07	1.41533e+07	1.02462e+07	4762100	2977930	19034500	5565220	7127180	1.15862e+07	7893386	-	-	7	7	7	20.8	20.8	20.8	29.367	0	48.677	26805000000	57	274	29367.6	Q9CR68	Q9CR68	Cytochrome b-c1 complex subunit Rieske, mitochondrial;Cytochrome b-c1 complex subunit 11	Uqcrfs1
6.21378e+06	6.62782e+06	5.54114e+06	4329280	3030890	11807100	8408810	9170170	6.12758e+06	7349250	-	-	22	22	22	36.6	36.6	36.6	82.669	0	146.53	31717000000	140	763	82669.8	Q8BMS1	Q8BMS1	Trifunctional enzyme subunit alpha, mitochondrial;Long-chain enoyl-CoA hydratase;Long chain 3-hydroxyacyl-CoA dehydrogenase	Hadha
9.33459e+06	1.05799e+07	7.59262e+06	4387820	3007950	10886500	5604870	8687650	9.16902e+06	6514958	-	-	9	9	9	31.5	31.5	31.5	38.937	0	318.83	25789000000	56	359	38937.1	Q9D051	Q9D051	Pyruvate dehydrogenase E1 component subunit beta, mitochondrial	Pdhb
9.66648e+06	1.17448e+07	8.74466e+06	3553470	5873640	10175000	6526320	6106450	1.0052e+07	6446976	-	-	10	10	10	29	29	29	56.495	0	284.99	31835000000	80	490	56495.7	P97443;G5E8R7;G3UZ94;Q8BMV4	P97443;G5E8R7	Histone-lysine N-methyltransferase Smyd1	Smyd1
1.97361e+07	1.66117e+07	2.17581e+07	3086810	2193650	4721870	5868810	15909700	1.93686e+07	6356168	+	-	3	3	3	17.6	17.6	17.6	13.322	0	216.26	30980000000	13	119	13322.5	E0CZ27;F8WI35;A0A1W2P768;P84244;P84228;P68433;P02301;E0CYN1;E0CYR7	E0CZ27;F8WI35;A0A1W2P768;P84244;P84228;P68433;P02301	Histone H3;Histone H3.3;Histone H3.2;Histone H3.1;Histone H3.3C	H3f3a;Hist1h3b;Hist1h3a;H3f3c
5.456e+06	6.6863e+06	5.00703e+06	2943720	2015580	12275300	5652990	7161440	5.71644e+06	6009806	-	-	22	22	22	42.8	42.8	42.8	70.875	0	323.31	26027000000	109	656	70875.5	P50544;B1AR28	P50544;B1AR28	Very long-chain specific acyl-CoA dehydrogenase, mitochondrial	Acadvl
7.37657e+06	8.71326e+06	7.97377e+06	4271480	3670550	4422960	6164260	10710700	8.0212e+06	5847990	-	-	13	13	13	41.3	41.3	41.3	43.953	0	323.31	26445000000	115	392	43953.6	O54724	O54724	Polymerase I and transcript release factor	Ptrf
5.73494e+06	6.09338e+06	5.46185e+06	3889230	2261260	13396700	3692670	5671260	5.76339e+06	5782224	-	-	14	14	14	42.5	42.5	42.5	52.851	0	323.31	23604000000	92	480	52851.8	Q9CZ13;A0A0A6YW82;A0A0A6YWX6	Q9CZ13	Cytochrome b-c1 complex subunit 1, mitochondrial	Uqcrc1
1.89151e+06	2.66789e+06	1.67754e+06	2179170	2923330	8619400	8389390	5720790	2.07898e+06	5566416	-	-	28	28	28	21	21	21	174.29	0	84.449	22787000000	103	1532	174287	F8VPN4;A0A0G2JGI9;F6XXE6;E0CYU6;E0CX86;F7CSZ6	F8VPN4;A0A0G2JGI9;F6XXE6		Agl
1.19515e+06	2.36257e+06	1.39388e+06	5367780	7126360	4222530	4197640	6574080	1.65053e+06	5497678	-	-	24	24	24	16.1	16.1	16.1	196.58	0	65.971	24903000000	70	1799	196579	Q61292;A0A0A6YY71;A0A0A6YWY6;A0A0A6YWI2	Q61292	Laminin subunit beta-2	Lamb2
5.80617e+06	5.26396e+06	6.28842e+06	4756460	4661650	6316520	NaN	NaN	5.78618e+06	5.24488e+06	-	-	1	1	1	0.6	0.6	0.6	122.67	0	64.226	32156000000	6	1096	122673	Q3USB7	Q3USB7	Inactive phospholipase C-like protein 1	Plcl1
25751.7	32188.2	7988.97	NaN	NaN	15492200	4549.61	997.26	21976.3	5.16592e+06	-	-	2	2	2	3.1	3.1	3.1	95.493	0.0050063	1.5854	2553600000	1	819	95494.5	D3Z0M9;E0CXN3	D3Z0M9;E0CXN3		Ddx23
4.22126e+06	5.95309e+06	4.61838e+06	3852570	3179480	6603750	3821400	8065000	4.93091e+06	5104440	-	-	13	13	13	33.2	33.2	33.2	60.955	0	90.782	22251000000	70	573	60955.5	P63038;D3Z2F2;D3Z7J9	P63038	60 kDa heat shock protein, mitochondrial	Hspd1
8.88509e+06	1.33563e+07	7.68155e+06	2929100	6215910	6574600	7881920	1438920	9.97432e+06	5008090	-	-	11	11	11	35.3	35.3	35.3	35.231	0	227.26	21193000000	25	326	35231	E0CXN5;P13707;D3Z0L6;Q3ULJ0	E0CXN5;P13707	Glycerol-3-phosphate dehydrogenase [NAD(+)];Glycerol-3-phosphate dehydrogenase [NAD(+)], cytoplasmic	Gpd1
3.26886e+06	4.42584e+06	2.86057e+06	2528030	3055970	6761990	5850210	6815950	3.51842e+06	5002430	-	-	29	29	29	32.7	32.7	32.7	116.72	0	286.7	28439000000	77	1066	116717	Q64727	Q64727	Vinculin	Vcl
3.21559e+06	3.96233e+06	3.53963e+06	2492870	3704390	3707060	5578770	9145910	3.57252e+06	4925800	-	-	1	1	1	1.6	1.6	1.6	98.405	0	4.7544	21580000000	30	885	98406	Q0VBD2	Q0VBD2	Protein MCM10 homolog	Mcm10
4.91712e+06	6.36418e+06	4.75757e+06	2714700	1746350	10042000	3846350	6146970	5.34629e+06	4899274	-	-	8	8	8	19.3	19.3	19.3	54.272	0	70.889	20736000000	37	509	54272.4	O08749	O08749	Dihydrolipoyl dehydrogenase, mitochondrial	Dld
2.88943e+06	3.3444e+06	2.79064e+06	2840230	2966700	7214740	4934840	5686700	3.00815e+06	4728642	-	-	21	21	21	28.9	28.9	28.9	99.213	0	323.31	21623000000	108	889	99214.3	E9Q5B5;O08528;E9Q3Z4;E9Q8S8;Q3TRM8;E9Q9M6;G3UVV4;Q91W97;P17710	E9Q5B5;O08528	Hexokinase;Hexokinase-2	Hk2
1.5889e+06	1.78162e+06	1.79246e+06	3378120	2522660	7955940	4158300	5402640	1.721e+06	4683532	-	-	26	26	26	22	22	22	177.19	0	323.31	26282000000	99	1607	177187	F8VQJ3;P02468;F6SFQ3;F6TLW1	F8VQJ3;P02468	Laminin subunit gamma-1	Lamc1
2.35574e+06	2.73917e+06	1.5804e+06	1848220	3059750	7432170	6393080	4570660	2.2251e+06	4660776	-	-	23	23	16	20.5	20.5	14.9	152.67	0	243.45	20995000000	78	1441	152671	A0A0G2JFH2	A0A0G2JFH2
4.8688e+06	5.60039e+06	5.11161e+06	2398790	1694280	7410850	5835360	5498460	5.1936e+06	4567548	-	-	5	5	5	15.9	15.9	15.9	51.346	0	174.23	19684000000	36	471	51346.5	O70622	O70622	Reticulon-2	Rtn2
2.24454e+06	2.92996e+06	2.33695e+06	3332200	2801760	9495590	3973360	2975950	2.50382e+06	4515772	-	-	13	13	13	33.5	33.5	33.5	139.41	0	31.037	20683000000	24	1403	139415	O88492	O88492	Perilipin-4	Plin4
5.32099e+06	6.98934e+06	4.4426e+06	2996030	3022320	4088980	8562970	3786150	5.58431e+06	4491290	-	-	13	13	13	31.1	31.1	31.1	56.979	0	251.48	19190000000	72	508	56979.3	Q91ZJ5	Q91ZJ5	UTP--glucose-1-phosphate uridylyltransferase	Ugp2
4.88397e+06	4.62136e+06	3.82449e+06	3367930	2629090	9390800	1893510	3871240	4.44327e+06	4230514	-	-	9	9	9	16.3	16.3	16.3	56.43	0	161.41	19422000000	117	503	56430.6	Q9D1G3;A0A1L1SR86;A0A1L1SRJ1	Q9D1G3	Protein-cysteine N-palmitoyltransferase HHAT-like protein	Hhatl
6.68019e+06	9.16765e+06	6.00432e+06	3322460	3498520	6262780	2175510	4900070	7.28405e+06	4031868	-	-	9	9	9	36	36	36	35.009	0	143.81	18726000000	35	333	35009.4	Q99LC5	Q99LC5	Electron transfer flavoprotein subunit alpha, mitochondrial	Etfa
1.57223e+07	2.41844e+07	1.44115e+07	1441330	1646050	7099040	4521100	5234580	1.81061e+07	3988420	-	-	7	7	7	53.3	53.3	53.3	18.634	0	28.527	18253000000	47	169	18634.7	P35385	P35385	Heat shock protein beta-7	Hspb7
8.07138e+06	1.21947e+07	7.20814e+06	2373200	4569000	3480490	6612760	2883470	9.15806e+06	3983784	-	-	11	11	11	38.1	38.1	38.1	42.598	0	323.31	21721000000	40	378	42598.9	Q60854;F8WIV2;K7E6F1;E9Q3Y1;E9Q6X2;E9Q108;E9Q0P9;E9PYY0;E9PZQ9;E9Q4R2;E9Q5Q5	Q60854;F8WIV2;K7E6F1	Serpin B6	Serpinb6;Serpinb6a
2.23687e+07	1.29958e+07	2.18842e+07	754951	2530930	NaN	321.256	12226000	1.90829e+07	3.87805e+06	-	-	1	1	1	6.6	6.6	6.6	35.111	0	7.7143	34539000000	1	319	35111	Q9QZ22	Q9QZ22	Olfactory receptor	Olfr155
6.96596e+06	8.01713e+06	7.10401e+06	1538190	1984980	7722910	4056410	3868930	7.36237e+06	3834284	-	-	9	9	9	32.6	32.6	32.6	41.008	0	43.673	19088000000	26	362	41008.1	A2AMM0	A2AMM0	Muscle-related coiled-coil protein	Murc
1.00668e+07	1.75963e+07	1.08374e+07	2809330	2816380	8334820	133091	5048210	1.28335e+07	3.82837e+06	-	-	12	1	1	36.8	2.9	2.9	28.335	0.0038119	1.6462	22022000000	9	239	28335.2	A2A6I5;A2A6I3;A2A6I0;A0A0R4J1A8;Z4YKD9;A0A0R4J1B0	A2A6I5;A2A6I3;A2A6I0;A0A0R4J1A8;Z4YKD9;A0A0R4J1B0		Tnnt3
NaN	NaN	4.0975e+10	3509680	6640480	2718350	3051030	2925440	4.0975e+10	3768996	-	+	2	2	2	16.2	16.2	16.2	14.701	0	9.9404	8538100000	13	NaN	1	sp|P61626ups|LYSC_HUMAN_UPS;P17897	sp|P61626ups|LYSC_HUMAN_UPS;P17897	Lysozyme C-1	Lyz1
2.7261e+06	519719	2.83245e+06	801781	99804	485012	1599430	15837200	2.02609e+06	3.76465e+06	-	-	22	17	17	52.8	44	44	53.687	0	41.97	11126000000	26	466	53687.7	P20152;A0A0A6YWC8;A2AKJ2;P03995;CON__Q9DCV7;CON__Q3KNV1;CON__P08729;G5E846;G3X981;Q9DCV7;P15331	P20152;A0A0A6YWC8	Vimentin	Vim
NaN	NaN	NaN	4034480	3938400	2327940	4424080	3971860	NaN	3739352	-	+	6	6	6	31.7	31.7	31.7	25.821	0	236.5	9238600000	39	NaN	1	sp|P16083ups|NQO2_HUMAN_UPS;Q9JI75	sp|P16083ups|NQO2_HUMAN_UPS
3.70244e+06	3.77412e+06	4.50394e+06	1625350	1751000	1928390	4323580	8674500	3.9935e+06	3660564	-	-	19	7	7	59.5	30.9	30.9	41.792	0	201.21	18600000000	72	375	41792.8	P63260;P60710;E9Q5F4;G3UZ07;E9Q1F2;E9Q606;G3UYG0;B1ATY1;Q8BFZ3;E9Q2D1;F8WGM8;F6WX90;V9GXQ2;E9Q3M9	P63260;P60710;E9Q5F4;G3UZ07;E9Q1F2;E9Q606	Actin, cytoplasmic 2;Actin, cytoplasmic 2, N-terminally processed;Actin, cytoplasmic 1;Actin, cytoplasmic 1, N-terminally processed	Actg1;Actb
6.17826e+06	6.37296e+06	5.17089e+06	2003460	2009500	6459920	2561440	4884500	5.90737e+06	3583764	-	-	8	8	8	27.8	27.8	27.8	32.898	0	45.296	18263000000	27	281	32898.7	Q7TMG8;O55126;A0A0G2JEV1	Q7TMG8;O55126	Protein NipSnap homolog 2	Gbas
9.80101e+06	1.01936e+07	1.07543e+07	3870890	1764140	3625240	4743460	3913580	1.02496e+07	3583462	-	-	5	5	5	22	22	22	25.976	0	34.575	19580000000	45	227	25976.4	P00405	P00405	Cytochrome c oxidase subunit 2	Mtco2
1.89294e+07	7.47626e+06	1.82063e+07	2060020	2508380	1665660	2257420	9009710	1.48706e+07	3500238	-	-	9	7	4	74.1	61.2	38.8	15.748	0	323.31	23771000000	49	147	15748.1	A8DUK4;E9Q223;P02088;CON__Q3SX09;CON__P02070;P02104	A8DUK4;E9Q223;P02088	Hemoglobin subunit beta-1	Hbbt1;Hbb-bs;Hbb-b1
1.87362e+07	1.17902e+07	1.9593e+07	4492290	2277390	1546510	6897690	1982230	1.67065e+07	3439222	-	-	4	4	4	29	29	29	17.521	0	32.984	16667000000	42	162	17520.9	Q5EBG6	Q5EBG6	Heat shock protein beta-6	Hspb6
4.53505e+06	6.28138e+06	4.12882e+06	1713430	2183460	4781990	3877730	4274390	4.98175e+06	3366200	-	-	14	14	14	39.5	39.5	39.5	50.113	0	221.87	18201000000	62	463	50114	Q9Z2I9	Q9Z2I9	Succinyl-CoA ligase [ADP-forming] subunit beta, mitochondrial	Sucla2
8.69062e+06	1.15925e+07	7.85532e+06	1862750	394459	9652720	3108730	1801830	9.37948e+06	3.3641e+06	-	-	4	4	4	23.9	23.9	23.9	29.224	0	217.68	15573000000	17	264	29224.4	O89104	O89104	Synaptophysin-like protein 2	Sypl2
488693	248525	955490	1562870	3181230	956995	320594	10456200	564236	3.29558e+06	-	-	8	8	8	5.3	5.3	5.3	138.03	0	20.325	9401900000	8	1453	138032	P11087	P11087	Collagen alpha-1(I) chain	Col1a1
1.58607e+06	2.31741e+06	1.7853e+06	2370260	1761120	6056590	2308070	3833180	1.89626e+06	3265844	-	-	20	20	20	22.5	22.5	22.5	124.63	0	91.03	17112000000	79	1103	124630	O08532;E9Q1X8;Q8C6Y3;E9Q683;Q6PHS9	O08532;E9Q1X8	Voltage-dependent calcium channel subunit alpha-2/delta-1;Voltage-dependent calcium channel subunit alpha-2-1;Voltage-dependent calcium channel subunit delta-1	Cacna2d1
6.4008e+06	1.07541e+07	5.54837e+06	2744830	3053560	3461770	4506160	1978350	7.56776e+06	3148934	-	-	14	14	14	47.5	47.5	47.5	46.247	0	323.31	18631000000	65	413	46247.6	P05201;F7ALS6	P05201	Aspartate aminotransferase, cytoplasmic	Got1
1.6886e+10	3.21294e+10	1.30183e+10	2427790	2361800	3496130	3809180	3449190	2.06779e+10	3108818	-	+	20	7	7	54.3	18.1	18.1	43.101	0	323.31	9826700000	52	NaN	1	sp|P06732ups|KCRM_HUMAN_UPS	sp|P06732ups|KCRM_HUMAN_UPS
4.31155e+06	6.2748e+06	5.19246e+06	1788250	1070720	8069470	1347570	3175310	5.25961e+06	3090264	-	-	8	8	8	33.5	33.5	33.5	30.149	0	92.773	13769000000	39	263	30149.3	Q9DCT2	Q9DCT2	NADH dehydrogenase [ubiquinone] iron-sulfur protein 3, mitochondrial	Ndufs3
1.43752e+07	1.27549e+07	1.72787e+07	2208340	1890660	2341440	2056320	6720950	1.48029e+07	3043542	-	-	12	9	9	30.9	26.5	26.5	29.88	0	323.31	24236000000	67	249	29880.8	E9Q688;O88346;J3QPC8;E9QA86;E9PVN9;E9PZB4;E9Q0G9;A0A087WQP1;A0A087WRX3;K3W4R6;K3W4R7;Q6P3Z7;J3QQ13;P50752	E9Q688;O88346;J3QPC8;E9QA86;E9PVN9;E9PZB4;E9Q0G9	Troponin T, slow skeletal muscle	Tnnt1
2.29393e+06	2.97891e+06	2.8537e+06	2406360	1755920	3996370	3739740	3132840	2.70885e+06	3006246	-	-	14	14	13	18.2	18.2	17.4	103.27	0	311.09	17514000000	65	978	103267	B2RQK7;Q8BWB1;D3YU08	B2RQK7;Q8BWB1;D3YU08	Synaptopodin 2-like protein	Synpo2l
7.11417e+06	1.1701e+07	1.10725e+07	2475540	798808	8479870	1201620	1976900	9.96255e+06	2.98655e+06	-	-	13	1	1	68.9	6.8	6.8	17.689	0	24.54	12424000000	9	161	17688.8	E9PWG4	E9PWG4		Myl1
7.8079e+06	8.29245e+06	7.37604e+06	2688490	2390640	2816910	3145310	3753420	7.82546e+06	2958954	-	-	5	5	5	28	28	28	24.116	0	41.803	15042000000	17	218	24116.1	K3W4Q8;P18572;J3QP71	K3W4Q8;P18572;J3QP71	Basigin	Bsg
1.11751e+06	1.51619e+06	1.16894e+06	2244380	1518720	3873900	3189670	3849200	1.26755e+06	2935174	-	-	20	20	20	16.8	16.8	16.8	173.21	0	92.657	15153000000	65	1561	173209	Q70IV5;A0A140LHQ9;A0A140LJ79;A0A140LJ61	Q70IV5;A0A140LHQ9;A0A140LJ79	Synemin	Synm
8.66364e+06	1.1921e+07	8.63853e+06	1372640	1540940	7496250	1776220	2074950	9.74106e+06	2852200	-	-	10	10	10	39.7	39.7	39.7	31.345	0	63.775	18370000000	47	277	31345.5	P47757;A2AMW0;F7CAZ6;A0A0A0MQI9;F6YHZ8	P47757;A2AMW0;F7CAZ6	F-actin-capping protein subunit beta	Capzb
3.21093e+06	4.63366e+06	3.37667e+06	1824020	1350610	3097950	2224730	5411510	3.74042e+06	2781764	-	-	12	12	12	30.5	30.5	30.5	57.058	0	76.815	16087000000	64	509	57058.5	P09103;E9Q8G8	P09103	Protein disulfide-isomerase	P4hb
5.24138e+06	5.37927e+06	4.03693e+06	1374110	945451	4099990	3218100	4133130	4.88586e+06	2.75416e+06	-	-	11	11	11	27.2	27.2	27.2	51.386	0	134.62	17223000000	96	475	51386.3	Q99JY0;D3YXU1	Q99JY0	Trifunctional enzyme subunit beta, mitochondrial;3-ketoacyl-CoA thiolase	Hadhb
6.63157e+06	7.0241e+06	4.70065e+06	1777450	1807110	4122670	3265820	2770660	6.11877e+06	2748742	-	-	6	6	6	25.3	25.3	25.3	31.794	0	86.295	12651000000	31	289	31794.6	Q9R059;F2Z455;D6RJ68	Q9R059;F2Z455	Four and a half LIM domains protein 3	Fhl3
4.58465e+06	6.04345e+06	4.34038e+06	2107860	1068400	4077970	2273230	4091290	4.98949e+06	2723750	-	-	15	15	15	40.2	40.2	40.2	49.913	0	160.18	16075000000	101	455	49913.2	D3YUM1;Q91YT0;D3Z1U9;D3Z0K1;D3YXX5;D6RG60	D3YUM1;Q91YT0;D3Z1U9	NADH dehydrogenase [ubiquinone] flavoprotein 1, mitochondrial	Ndufv1
9.38712e+06	1.0962e+07	9.95688e+06	1502980	1201750	4397790	2638390	3754320	1.0102e+07	2699046	-	-	5	5	5	25.1	25.1	25.1	20.375	0	13.656	15113000000	26	175	20375.7	Q9D9P1;D3Z0L4;Q9CRB9;S4R238;F6QFL0	Q9D9P1;D3Z0L4;Q9CRB9	MICOS complex subunit Mic19	Chchd3
2.32808e+06	4.00529e+06	2.41188e+06	2230960	2546870	2642160	3928860	1883430	2.91508e+06	2646456	-	-	17	17	17	22.4	22.4	22.4	95.313	0	24.607	16027000000	41	858	95314	P58252;G3UXK8;G3UZ34;A2AH85;O08810	P58252	Elongation factor 2	Eef2
4.90482e+06	5.61646e+06	4.0872e+06	1513260	1450240	4818990	1528750	3867560	4.86949e+06	2635760	-	-	12	12	12	31.2	31.2	31.2	47.896	0	68.044	16380000000	35	430	47896.9	A0A0R4J083;P51174	A0A0R4J083;P51174	Long-chain specific acyl-CoA dehydrogenase, mitochondrial	Acadl
5.72689e+06	8.22785e+06	2.97742e+06	859390	2072970	3703400	4320740	2090280	5.64405e+06	2609356	-	-	10	10	10	30.7	30.7	30.7	40.996	0	128.95	12961000000	37	365	40995.9	Q8VEE1	Q8VEE1	LIM and cysteine-rich domains protein 1	Lmcd1
4.297e+06	3.8836e+06	5.35112e+06	720770	1155600	3214060	1803080	6115750	4.51057e+06	2601852	+	-	4	4	4	20.6	20.6	20.6	20.861	0	5.9535	10571000000	12	194	20860.9	P10922	P10922	Histone H1.0;Histone H1.0, N-terminally processed	H1f0
2.29854e+06	3.69476e+06	2.0647e+06	1714980	1190930	4547010	2275590	3269080	2.686e+06	2599518	-	-	17	17	17	29	29	29	78.034	0	89.092	16268000000	86	699	78034.5	D3Z041;P41216;D3Z457;D3YVF6;Q8JZR0;F6WNZ2	D3Z041;P41216	Long-chain-fatty-acid--CoA ligase 1	Acsl1
1.15429e+06	689185	1.89357e+06	2007740	3081820	2043020	4775400	860852	1.24568e+06	2.55377e+06	-	-	6	6	5	6.1	6.1	5.3	107.8	0	14.83	11361000000	28	978	107796	E9Q035;Q921I1;F7CJN9;F7BAE9;E9Q2Q7;D3YYR8;D3YY36;P47758;Q9DBD0	E9Q035;Q921I1	Serotransferrin	Gm20425;Tf
7.97307e+06	1.06952e+07	9.24611e+06	1808440	1342420	4066970	1937380	3380020	9.30481e+06	2507046	-	-	4	4	4	25.7	25.7	25.7	19.803	0	102.39	13705000000	69	175	19802.7	E9QPX3;Q9CXZ1	E9QPX3;Q9CXZ1	NADH dehydrogenase [ubiquinone] iron-sulfur protein 4, mitochondrial	Ndufs4
1.10103e+07	8.64486e+06	9.61703e+06	817379	850946	3950950	1878390	4805420	9.75739e+06	2460617	-	-	11	11	11	50.8	50.8	50.8	29.761	0	323.31	17082000000	44	264	29761.6	Q9JJW5;D6RGM5	Q9JJW5	Myozenin-2	Myoz2
136923	1.32235e+06	1.57249e+06	1470720	62688.9	1139100	1912390	7540080	1.01059e+06	2.425e+06	-	-	5	5	4	13.3	13.3	11	39.809	0	5.1212	6445900000	5	354	39809	P28654	P28654	Decorin	Dcn
61458.8	105545	49260.5	1048440	167943	331669	9457550	958635	72088	2.39285e+06	-	-	8	8	8	3.8	3.8	3.8	332.91	0	25.382	5306800000	12	2883	332912	E9Q557;E9PZW0	E9Q557;E9PZW0	Desmoplakin	Dsp
2.21126e+06	2.48429e+06	2.07769e+06	1381160	556604	4189760	1810320	3920040	2.25774e+06	2.37158e+06	-	-	10	10	10	13.6	13.6	13.6	88.216	0	113.93	14258000000	45	772	88217.4	Q924X2;F6QXT4;P97742	Q924X2	Carnitine O-palmitoyltransferase 1, muscle isoform	Cpt1b
7.26073e+06	1.07546e+07	9.30901e+06	543366	1634080	4020050	3412740	2170050	9.1081e+06	2.35606e+06	-	-	3	3	3	10.7	10.7	10.7	33.309	0	25.922	19444000000	18	298	33309.1	Q3TMP8;A0A1D5RMM9;A0A1D5RLJ0	Q3TMP8	Trimeric intracellular cation channel type A	Tmem38a
1.83309e+06	2.08976e+06	1.69747e+06	1166800	1595770	3330490	2474930	3203030	1.87344e+06	2354204	-	-	11	10	10	11	10.3	10.3	135.76	0	68.273	15211000000	34	1257	135757	E9Q1U2;Q91YE8;D3YVV9;A0A0G2JDM5	E9Q1U2;Q91YE8;D3YVV9	Synaptopodin-2	Synpo2
6.68103e+06	8.22395e+06	5.90354e+06	1002850	878858	1860470	4829660	2984680	6.93617e+06	2.3113e+06	-	-	9	9	9	44.9	44.9	44.9	38.813	0	138.89	15419000000	33	361	38813.6	Q9JKB3;A0A0A0MQD2;B2RUF0;P62960;Q9Z2C8	Q9JKB3	Y-box-binding protein 3	Ybx3
7.29823e+06	9.4808e+06	6.43508e+06	1638970	1361300	4215100	1552860	2559250	7.73803e+06	2265496	-	-	8	8	8	36.1	36.1	36.1	27.623	0	105.15	15569000000	73	255	27623.3	Q9DCW4;A0A0U1RNP5;A0A0N4SVE0;A0A0U1RNK9;A0A0U1RNR3;A0A0U1RQB4;A0A0N4SWE9	Q9DCW4;A0A0U1RNP5;A0A0N4SVE0;A0A0U1RNK9;A0A0U1RNR3	Electron transfer flavoprotein subunit beta	Etfb
1.17982e+06	1.38063e+06	789538	1191070	1017880	3409650	2013170	3191080	1.11666e+06	2164570	-	-	24	24	24	16.2	16.2	16.2	191.88	0	36.545	12769000000	62	1692	191884	E9PZF4;Q80XB4;E9Q641;F7CXG1	E9PZF4;Q80XB4;E9Q641	Nebulin-related-anchoring protein	Nrap
1.15918e+07	1.49243e+07	1.30705e+07	299496	206641	4032820	2137940	3045200	1.31956e+07	1.94442e+06	-	-	1	1	1	7.4	7.4	7.4	16.367	0.0025907	1.7599	13613000000	2	149	16367.1	A2AL77;Q9CR06;A2AL78;A2AL76	A2AL77;Q9CR06;A2AL78;A2AL76		Asph
2.42728e+06	3.65964e+06	2.53195e+06	729561	918555	3459410	2563780	1926740	2.87295e+06	1.91961e+06	-	-	8	8	8	13.6	13.6	13.6	71.904	0	65.45	13310000000	21	660	71905.1	Q9ET80;A0A087WRN3	Q9ET80	Junctophilin-1	Jph1
4.63067e+06	6.87845e+06	4.90255e+06	1217440	1039300	3163860	1972310	1988170	5.47055e+06	1876216	-	-	8	8	8	23.2	23.2	23.2	39.261	0	323.31	13554000000	74	345	39261.4	Q9JLH8;D3Z5Q9	Q9JLH8;D3Z5Q9	Tropomodulin-4	Tmod4
6.39992e+06	9.23503e+06	5.25345e+06	1307620	1018580	946565	1781340	4222980	6.9628e+06	1855417	-	-	6	6	6	35	35	35	28.09	0	316.88	12197000000	33	266	28090.4	Q9D172;A0A1W2P7B6;A0A1W2P870	Q9D172;A0A1W2P7B6;A0A1W2P870	ES1 protein homolog, mitochondrial	D10Jhu81e
1.88876e+07	3.01405e+07	2.16138e+07	2230000	1486890	1434670	1064740	2896610	2.35473e+07	1822582	-	-	5	5	5	48.7	48.7	48.7	8.4689	0	27.1	13942000000	10	76	8469	Q9CPQ1;D3Z6E1;A0A0G2JDA6	Q9CPQ1	Cytochrome c oxidase subunit 6C	Cox6c
NaN	NaN	NaN	1566460	866325	2946760	409761	3063660	NaN	1.77059e+06	-	-	1	1	1	0.9	0.9	0.9	92.31	0	5.2845	4372800000	2	815	92311	Q91YE7;Q99KG3	Q91YE7;Q99KG3	RNA-binding protein 5;RNA-binding protein 10	Rbm5;Rbm10
5.98715e+06	9.24345e+06	6.40492e+06	659117	367392	3736670	2778680	1288260	7.21184e+06	1.76602e+06	-	-	7	7	7	27.9	27.9	27.9	30.446	0	161.35	15151000000	39	283	30446.2	G3UX26;Q60930;D3YZT5;D3YUN8	G3UX26;Q60930;D3YZT5	Voltage-dependent anion-selective channel protein 2	Vdac2
355330	1.66728e+06	519193	455589	1281180	4304530	714868	1861580	847266	1.72355e+06	-	-	25	25	25	23.2	23.2	23.2	164.74	0	91.775	10968000000	71	1463	164738	Q14BI5	Q14BI5		Myom2
4.54717e+06	4.36727e+06	3.55114e+06	1117410	472436	2545180	1787930	2604100	4.15519e+06	1.70541e+06	-	-	11	11	11	35.7	35.7	35.7	42.194	0	323.31	11984000000	32	384	42194.7	Q91VA7;V9GXV0	Q91VA7	Isocitrate dehydrogenase [NAD] subunit, mitochondrial	Idh3b
4.69689e+06	6.55079e+06	3.92398e+06	1030900	1806830	794436	4038820	843120	5.05722e+06	1.70282e+06	-	-	7	7	7	22.8	22.8	22.8	35.732	0	111.44	11020000000	34	316	35732.2	P45376;D3YVJ7	P45376;D3YVJ7	Aldose reductase	Akr1b1;Akr1b3
1.22355e+07	1.27054e+07	9.62252e+06	1852660	368165	1719320	2203980	2241540	1.15211e+07	1677133	-	-	5	5	5	26.1	26.1	26.1	24.603	0	319.65	15578000000	37	222	24602.9	P09671	P09671	Superoxide dismutase [Mn], mitochondrial	Sod2
1.59369e+07	1.44417e+07	1.38414e+07	702096	1048520	1787400	2758190	1534130	1.474e+07	1.56607e+06	-	-	5	5	5	31.4	31.4	31.4	19.53	0	126.2	17811000000	66	169	19530.5	P19783;M0QWX7	P19783	Cytochrome c oxidase subunit 4 isoform 1, mitochondrial	Cox4i1
2.92977e+06	6.28909e+06	4.61299e+06	916032	654675	1580390	1486040	2510030	4.61062e+06	1.42943e+06	-	-	2	2	2	12.6	12.6	12.6	25.12	0	86.617	9204500000	4	223	25120.1	O70578	O70578	Voltage-dependent calcium channel gamma-1 subunit	Cacng1
5.75483e+06	9.50862e+06	5.06017e+06	855914	1540690	1286600	2564560	887415	6.77454e+06	1.42704e+06	-	-	5	5	5	19.2	19.2	19.2	27.902	0	14.447	10673000000	13	245	27901.8	Q8R1G2;E0CXT6;E0CXH4	Q8R1G2	Carboxymethylenebutenolidase homolog	Cmbl
2.55779e+06	4.03974e+06	2.64105e+06	601491	480134	3330490	1039440	1644880	3.07953e+06	1419287	-	-	3	3	3	10.4	10.4	10.4	44.116	0.0027778	2.1306	9331900000	3	402	44116.9	Q99KJ8	Q99KJ8	Dynactin subunit 2	Dctn2
3.55496e+06	5.33725e+06	3.30545e+06	1170150	1067490	1533800	1843990	1413190	4.06589e+06	1405724	-	-	14	14	14	40.9	40.9	40.9	52.816	0	36.338	11506000000	57	477	52816.8	Q1XH17	Q1XH17	Tripartite motif-containing protein 72	Trim72
2.69636e+06	3.63203e+06	2.66979e+06	682627	513740	2067400	870873	2769840	2.99939e+06	1380896	-	-	9	9	9	30.2	30.2	30.2	48.994	0	244.18	11323000000	68	454	48994.5	Q9D2G2	Q9D2G2	Dihydrolipoyllysine-residue succinyltransferase component of 2-oxoglutarate dehydrogenase complex, mitochondrial	Dlst
7.04126e+06	8.89562e+06	7.2458e+06	1461090	731978	475445	2423100	1803170	7.72756e+06	1.37896e+06	-	-	7	7	6	33.2	33.2	29.5	28.556	0	20.552	10908000000	40	244	28556.1	A2AE89;P10649;F6WHQ7;F6Y363;D3YZ29;D3YVP6;D3YX76;A2AE91;E9QAC8;D3YVP5;Q8R5I6;P19639;Q80W21;P15626	A2AE89;P10649;F6WHQ7	Glutathione S-transferase Mu 1	Gstm1
1.9199e+06	2.22159e+06	1.89808e+06	529646	466320	2337450	2214480	1305550	2.01319e+06	1.37069e+06	-	-	11	11	11	22.8	22.8	22.8	76.623	0	140.8	10103000000	71	674	76624.3	A0A1B0GT92;Q9Z1E4	A0A1B0GT92;Q9Z1E4	Glycogen [starch] synthase, muscle	Gys1
4.10905e+06	4.39014e+06	3.28574e+06	1017510	716318	2231940	1005890	1695360	3.92831e+06	1.3334e+06	-	-	10	10	10	55.6	55.6	55.6	32.967	0	191.62	9597400000	63	286	32967.1	P47754;D6RCW7;A0A0N4SVM0;A0A0G2JE27;Q5RKN9;P47753	P47754;D6RCW7;A0A0N4SVM0	F-actin-capping protein subunit alpha-2	Capza2
7.10315e+06	8.39087e+06	7.87822e+06	1127020	360533	2347220	1322750	1503850	7.79075e+06	1.33227e+06	-	-	5	5	5	25.4	25.4	25.4	21.71	0	20.959	10863000000	31	189	21710.2	Q9CQH3;D3Z568;F6Y6V5;D3YX99;D3Z6W9	Q9CQH3;D3Z568;F6Y6V5;D3YX99;D3Z6W9	NADH dehydrogenase [ubiquinone] 1 beta subcomplex subunit 5, mitochondrial	Ndufb5
2.56808e+06	4.89582e+06	2.18071e+06	635650	585988	1313980	1376250	2649630	3.21487e+06	1.3123e+06	-	-	8	8	7	33.4	33.4	30.9	37.402	0	34.75	8116900000	40	353	37402.7	O88569;A0A0N4SUM2	O88569;A0A0N4SUM2	Heterogeneous nuclear ribonucleoproteins A2/B1	Hnrnpa2b1
5.79687e+06	7.16932e+06	5.77646e+06	608454	240608	2712710	1072750	1857380	6.24755e+06	1.29838e+06	-	-	6	6	6	20.6	20.6	20.6	31.814	0	136.81	12428000000	30	282	31813.9	Q9CQA3	Q9CQA3	Succinate dehydrogenase [ubiquinone] iron-sulfur subunit, mitochondrial	Sdhb
3.65317e+06	5.54662e+06	2.80298e+06	819809	1043090	1181850	1881550	1452250	4.00092e+06	1.27571e+06	-	-	8	6	6	39.6	33.5	33.5	27.771	0	323.31	8260700000	30	245	27771.1	P63101;D3YXN6;D3YXF4	P63101;D3YXN6	14-3-3 protein zeta/delta	Ywhaz
5.31394e+06	8.37068e+06	6.42009e+06	646120	626726	3188110	969668	858193	6.70157e+06	1.25776e+06	-	-	7	7	7	40.5	40.5	40.5	24.658	0	113.23	10613000000	19	222	24657.9	Q8BVJ7;Q3TJD7;B8JJB2;B8JJB3;B8JJB1	Q8BVJ7;Q3TJD7	PDZ and LIM domain protein 7	Pdlim7
307683	227696	630963	961874	713660	961345	174603	3263920	388781	1.21508e+06	-	-	6	6	6	5.5	5.5	5.5	129.56	0	19.034	5573300000	17	1372	129557	Q01149;E0CXI2	Q01149	Collagen alpha-2(I) chain	Col1a2
2.21948e+06	2.81061e+06	1.97442e+06	645499	461795	2571510	1343820	964646	2.33484e+06	1197454	-	-	14	14	14	35.2	35.2	35.2	61.859	0	52.295	8849200000	52	577	61860.2	Q9JLV1	Q9JLV1	BAG family molecular chaperone regulator 3	Bag3
695511	774484	584574	3006820	822226	207655	283014	1653130	684856	1194569	-	-	8	4	2	16.1	7.5	3.7	70.078	0	14.257	5984300000	13	641	70079.2	Q61696;P17879	Q61696;P17879	Heat shock 70 kDa protein 1A;Heat shock 70 kDa protein 1B	Hspa1a;Hspa1b
2.76662e+06	3.9864e+06	2.66962e+06	479334	484925	2655150	764866	1550180	3.14088e+06	1186891	-	-	7	7	7	19.1	19.1	19.1	48.584	0	60.824	9091600000	32	424	48584.9	Q99JB8;B1AW94;B1AW93;B1AW91;A6PWR1;B1AW92;F6W8Y8;B1AW95	Q99JB8	Protein kinase C and casein kinase II substrate protein 3	Pacsin3
438248	866626	332202	339479	551564	3716980	754774	472159	545692	1.16699e+06	-	-	5	5	5	6.5	6.5	6.5	105.73	0	4.3563	4722000000	12	953	105730	Q3TXS7;D6RGR5	Q3TXS7	26S proteasome non-ATPase regulatory subunit 1	Psmd1
2.53448e+06	2.52547e+06	1.85626e+06	770635	579907	1628320	740349	2101100	2.30541e+06	1.16406e+06	-	-	6	5	5	14.8	12.8	12.8	50.906	0	54.809	8654100000	34	452	50906.2	P54071;D6RIL6;A0A0U1RP68;A0A0U1RPR1	P54071;D6RIL6	Isocitrate dehydrogenase [NADP], mitochondrial	Idh2
2.67974e+06	5.65119e+06	4.97882e+06	492256	906954	3618150	198091	591960	4.43658e+06	1.16148e+06	-	-	1	1	1	4.9	4.9	4.9	26.422	0	75.396	12032000000	3	247	26422	Q9CPN9	Q9CPN9		2210010C04Rik
1.14001e+07	8.16833e+06	1.37732e+07	1871660	1675450	465644	215384	1498800	1.11139e+07	1.14539e+06	-	-	8	8	8	53.1	53.1	53.1	18.621	0	48.472	13201000000	51	160	18621.3	G3X9L6;Q9DCX2;B1ASE2	G3X9L6;Q9DCX2;B1ASE2	ATP synthase subunit d, mitochondrial	Gm10250;Atp5h
2.67468e+06	2.84993e+06	3.41616e+06	800723	354899	1486760	1246990	1797000	2.98026e+06	1.13727e+06	-	-	7	7	7	27.4	27.4	27.4	33.296	0	256.19	8665200000	52	299	33296.4	O35129;F6QPR1;F6Q8V7	O35129	Prohibitin-2	Phb2
NaN	NaN	NaN	1167810	991419	1087620	1265800	1081570	NaN	1.11884e+06	-	+	3	3	3	27.7	27.7	27.7	11.225	0	8.76	3460700000	8	101	11225.2	Q8CFZ0;G3UYP0;sp|P63279ups|UBC9_HUMAN_UPS;P63280;G3UWL6;G3UWJ1	Q8CFZ0;G3UYP0;sp|P63279ups|UBC9_HUMAN_UPS;P63280	SUMO-conjugating enzyme UBC9	Ube2i
2.04845e+06	6.73322e+06	3.28854e+06	690770	377005	867753	404007	3191930	4.0234e+06	1106293	-	-	12	12	12	35.8	35.8	35.8	52.641	0	152.61	9549900000	39	483	52641.4	P70402	P70402	Myosin-binding protein H	Mybph
1.22767e+07	2.26107e+06	8.92936e+06	2631610	2116530	38921.7	707641	25459.1	7.82236e+06	1.10403e+06	-	-	7	6	6	44.3	39.6	39.6	16.837	0	146.43	8067200000	17	149	16837.6	P0DP28;P0DP27;P0DP26;Q3UKW2;Q9D6P8;G3UZ90;G3UX57	P0DP28;P0DP27;P0DP26;Q3UKW2		Calm1
9.98667e+06	1.16283e+07	7.46952e+06	863066	1214550	884618	1974040	569292	9.69483e+06	1.10111e+06	-	-	5	5	5	41.7	41.7	41.7	18.474	0	164.06	9170200000	26	175	18474.4	A2A813;Q99LX0;A2A815;A2A817;A2A816	A2A813;Q99LX0;A2A815;A2A817;A2A816	Protein deglycase DJ-1	Park7
1.18083e+06	813810	1.09059e+06	752456	739037	1558130	1226230	1189780	1.02841e+06	1.09313e+06	-	-	14	14	14	12.7	12.7	12.7	136.54	0	28.749	11140000000	44	1245	136538	P10493;O88322	P10493	Nidogen-1	Nid1
5.38583e+06	5.33997e+06	5.38252e+06	678433	531996	1710860	1404470	1124990	5.36944e+06	1.09015e+06	-	-	7	7	5	45.5	45.5	33.8	23.363	0	89.466	9260500000	37	213	23363.6	Q9DB20;F7D3P8	Q9DB20	ATP synthase subunit O, mitochondrial	Atp5o
2.41005e+06	4.71979e+06	2.01192e+06	858673	1071360	875911	2078450	536878	3.04725e+06	1.08425e+06	-	-	6	6	6	15.1	15.1	15.1	49.925	0	20.207	8885900000	24	463	49925.3	Q07076	Q07076	Annexin A7	Anxa7
226683	236713	179974	192886	257397	2020760	665712	2274460	214457	1082243	-	-	14	14	14	14.8	14.8	14.8	604.25	0	38.862	7846800000	45	5656	604253	E9Q616	E9Q616		Ahnak
3.59984e+06	3.27614e+06	3.0664e+06	838041	429607	1638060	794420	1617030	3.31413e+06	1.06343e+06	-	-	2	2	2	8.6	8.6	8.6	26.306	0	36.119	7773700000	24	243	26306.1	Q3UBX0;D3Z7P2;D3Z3Z2;D3YX08;D3Z0I8	Q3UBX0;D3Z7P2;D3Z3Z2;D3YX08;D3Z0I8	Transmembrane protein 109	Tmem109
2.00678e+06	2.58748e+06	2.10642e+06	527288	429913	2200220	681085	1206750	2.23356e+06	1.00905e+06	-	-	11	1	1	34.8	2.6	2.6	40.635	0.0085784	1.4777	6941600000	16	342	40635.7	G3UWS1	G3UWS1		Neb
2.72101e+06	3.80186e+06	2.42327e+06	513205	348937	1999500	537549	1592900	2.98205e+06	998418	-	-	5	5	5	16.2	16.2	16.2	36.154	0	4.3498	8054200000	4	346	36154.8	Q9WUM5;A0A0N4SVU4	Q9WUM5	Succinyl-CoA ligase [ADP/GDP-forming] subunit alpha, mitochondrial	Suclg1
2.593e+06	4.04568e+06	3.00056e+06	533858	398788	1934330	663774	1228290	3.21308e+06	951808	-	-	4	4	4	18.3	18.3	18.3	24.683	0	8.4443	6665300000	17	224	24682.9	Q9DC70	Q9DC70	NADH dehydrogenase [ubiquinone] iron-sulfur protein 7, mitochondrial	Ndufs7
3.52049e+06	4.16824e+06	2.23688e+06	482638	848210	805635	1664870	925524	3.30853e+06	945375	-	-	8	8	8	21.4	21.4	21.4	49.524	0	15.659	8768000000	11	459	49525	Q99LM3	Q99LM3	Smoothelin-like protein 1	Smtnl1
278018	381462	248026	93655.5	84661.3	4278380	147249	73150.6	302502	935419	-	-	7	7	7	9.1	9.1	9.1	103.64	0	6.765	2868900000	10	931	103638	Q8CGY6	Q8CGY6	Protein unc-45 homolog B	Unc45b
2.09504e+06	3.00891e+06	1.61809e+06	451674	417054	1988780	479658	1319150	2.24068e+06	931263	-	-	14	14	14	38.5	38.5	38.5	57.915	0	62.021	8682800000	30	535	57915.6	Q9EQ20	Q9EQ20	Methylmalonate-semialdehyde dehydrogenase [acylating], mitochondrial	Aldh6a1
6.16638e+06	7.84126e+06	7.34384e+06	347245	337761	1208940	2183490	511510	7.11716e+06	917789	-	-	16	2	0	93.3	7.4	0	16.881	0	323.31	8036800000	15	149	16881.1	A0A0U1RP93	A0A0U1RP93
2.28228e+06	2.44382e+06	1.59736e+06	123603	81582.2	3835580	284893	199039	2.10782e+06	904939	-	-	6	6	6	30.4	30.4	30.4	28.127	0	7.7412	4759500000	27	257	28127	P20108	P20108	Thioredoxin-dependent peroxide reductase, mitochondrial	Prdx3
8.11731e+06	8.32335e+06	8.11513e+06	353895	191286	1126150	1354310	1474370	8.18526e+06	900002	-	-	4	4	4	30.2	30.2	30.2	19.992	0	38.649	9756600000	32	172	19992.1	Q9DCJ5	Q9DCJ5	NADH dehydrogenase [ubiquinone] 1 alpha subcomplex subunit 8	Ndufa8
2.12811e+06	2.97675e+06	2.09694e+06	653928	360207	1684620	494107	1119920	2.4006e+06	862556	-	-	11	11	11	21.1	21.1	21.1	69.603	0	55.996	9496400000	59	621	69603.4	A0A0R4J166;Q9D783	A0A0R4J166;Q9D783	Kelch-like protein 40	Klhl40
690589	1.18646e+06	750806	549561	297060	1164440	1118760	979615	875951	821887	-	-	10	10	10	8.9	8.9	8.9	172.47	0	126.69	9023000000	29	1507	172477	F7CNJ1;E9QPX8;E9Q7B5;F8VQE0;Q02789	F7CNJ1;E9QPX8;E9Q7B5;F8VQE0;Q02789	Voltage-dependent L-type calcium channel subunit alpha-1S	Cacna1s
1.80955e+06	1.4873e+06	1.42468e+06	412670	360349	1166330	614560	1443420	1.57384e+06	799466	-	-	7	7	7	12.7	12.7	12.7	78.185	0	132.96	7637800000	54	714	78185.6	Q9WTR5	Q9WTR5	Cadherin-13	Cdh13
1.04596e+07	3.02036e+06	1.09448e+07	1611710	627405	67418.3	1070770	607373	8.14157e+06	796935	-	-	3	3	3	22.6	22.6	22.6	17.6	0	97.534	8838600000	10	168	17600	Q9D3D9;D3Z7S4	Q9D3D9	ATP synthase subunit delta, mitochondrial	Atp5d
1.28944e+06	1.8899e+06	1.29707e+06	286712	273866	1486460	627148	1307460	1.49214e+06	796329	-	-	12	12	12	22.4	22.4	22.4	73.46	0	114.41	7628300000	36	679	73461.3	P38647	P38647	Stress-70 protein, mitochondrial	Hspa9
2.17651e+06	3.37521e+06	2.00448e+06	174889	160883	2027710	647704	923426	2.51873e+06	786922	-	-	1	1	1	5	5	5	41.147	0.0027174	1.955	7027000000	7	380	41147.8	Q5Y5T2	Q5Y5T2	Palmitoyltransferase ZDHHC18	Zdhhc18
5.79363e+06	3.84352e+06	5.01823e+06	854395	727071	422719	935099	918943	4.88513e+06	771645	-	-	4	4	4	19.3	19.3	19.3	30.282	0	323.31	9336400000	25	270	30282.1	F6SFF5;Q8K1Z0;A0A1D5RLE9	F6SFF5;Q8K1Z0	Ubiquinone biosynthesis protein COQ9, mitochondrial	Coq9
NaN	NaN	NaN	NaN	NaN	764256	NaN	NaN	NaN	764256	-	-	1	1	1	0.2	0.2	0.2	550.83	0	9.8048	364900000	0	5068	550834	Q9QYX7	Q9QYX7	Protein piccolo	Pclo
2.19811e+06	2.77584e+06	1.99249e+06	449378	277297	1141480	705514	1196510	2.32215e+06	754036	-	-	11	11	11	30.2	30.2	30.2	52.625	0	182.74	8404300000	46	463	52625.7	Q91WD5;D3YXT0;A0A0A6YW30;A0A0A6YXD3	Q91WD5;D3YXT0	NADH dehydrogenase [ubiquinone] iron-sulfur protein 2, mitochondrial	Ndufs2
908724	1.32416e+06	1.09484e+06	255686	129599	1419360	936174	949040	1.10924e+06	737972	-	-	1	1	1	0.9	0.9	0.9	115.16	0	5.7107	8074700000	16	1034	115164	A0A1B0GRM4;P60469	A0A1B0GRM4;P60469	Liprin-alpha-3	Ppfia3
3.01895e+06	3.8456e+06	2.0755e+06	293450	351098	946456	818864	1257230	2.98001e+06	733420	-	-	4	4	4	11.1	11.1	11.1	34.463	0	4.2934	6971300000	17	314	34463.9	Q61425	Q61425	Hydroxyacyl-coenzyme A dehydrogenase, mitochondrial	Hadh
2.49064e+06	1.87135e+06	2.72155e+06	115986	86155.8	670131	905345	1836860	2.36118e+06	722896	+	-	6	3	2	29.2	16	12.8	21.977	0	20.713	5265800000	7	219	21977.3	P43274	P43274	Histone H1.4	Hist1h1e
27244	16871.6	16027.5	4454.91	373065	906599	839917	1451960	20047.7	715199	-	-	11	11	11	4.4	4.4	4.4	312.3	0	29.198	5604800000	11	2873	312298	Q61554;Q61555	Q61554	Fibrillin-1	Fbn1
2.42926e+06	2.46362e+06	1.54256e+06	452949	305498	1036830	873176	834626	2.14514e+06	700616	-	-	9	9	9	28.8	28.8	28.8	44.816	0	47.807	6597600000	36	424	44816.1	Q8QZT1	Q8QZT1	Acetyl-CoA acetyltransferase, mitochondrial	Acat1
3.32646e+06	4.41297e+06	2.95386e+06	519277	427898	739140	611646	1160780	3.56443e+06	691748	-	-	6	6	6	25.9	25.9	25.9	34.127	0	83.195	8469500000	29	301	34127.7	Q9DCN2;F2Z456;A0A0A0MQM3	Q9DCN2;F2Z456;A0A0A0MQM3	NADH-cytochrome b5 reductase 3;NADH-cytochrome b5 reductase 3 membrane-bound form;NADH-cytochrome b5 reductase 3 soluble form;NADH-cytochrome b5 reductase	Cyb5r3
311428	157610	494377	8948.21	7072.8	74899.8	3209180	62438.4	321138	672508	-	-	2	2	2	0.8	0.8	0.8	218.71	0.0074349	1.5322	3867200000	4	1917	218712	A0A1D5RM88;A0A1D5RLE0;E9QMR2;A0A1D5RMM1;F8VPN7;Q8BIK4;A0A1D5RLB8	A0A1D5RM88;A0A1D5RLE0;E9QMR2;A0A1D5RMM1;F8VPN7;Q8BIK4;A0A1D5RLB8	Dedicator of cytokinesis protein 9	Dock9
2.97805e+06	2.91568e+06	2.12488e+06	153026	160781	1973860	437601	612764	2.67287e+06	667606	-	-	5	5	5	18.5	18.5	18.5	42.121	0	323.31	7611100000	53	373	42121.7	A0A0R3P9C8;Q9DC69	A0A0R3P9C8;Q9DC69	NADH dehydrogenase [ubiquinone] 1 alpha subcomplex subunit 9, mitochondrial	Ndufa9
502182	1.07799e+06	593078	302130	178511	1875800	300213	671091	724417	665549	-	-	15	14	14	17.8	16.8	16.8	127.35	0	81.11	5984700000	47	1136	127352	Q5XKE0;A0A140LI70	Q5XKE0	Myosin-binding protein C, fast-type	Mybpc2
1.58949e+06	1.86326e+06	1.09648e+06	437918	372805	1115230	788945	587579	1.51641e+06	660495	-	-	8	8	8	20.2	20.2	20.2	53.282	0	181.25	5805300000	38	499	53282.7	A2AKD7;Q61234	A2AKD7;Q61234	Alpha-1-syntrophin	Snta1
5.76428e+06	4.89363e+06	4.07204e+06	675687	660522	662426	872967	357214	4.90998e+06	645763	-	-	6	6	6	38.5	38.5	38.5	20.83	0	116.5	5649100000	24	187	20830.4	P70296;D3Z1V4;D6RHS6	P70296;D3Z1V4;D6RHS6	Phosphatidylethanolamine-binding protein 1;Hippocampal cholinergic neurostimulating peptide	Pebp1
1.30595e+06	1.89206e+06	1.47817e+06	358652	283762	1590980	405955	572096	1.55873e+06	642289	-	-	5	5	5	11.8	11.8	11.8	53.998	0	7.2347	6024600000	9	501	53999	Q8BKZ9;A2AWH8;A2AWH7	Q8BKZ9	Pyruvate dehydrogenase protein X component, mitochondrial	Pdhx
977518	1.28063e+06	634550	329165	314907	1131150	684644	712582	964234	634490	-	-	9	8	8	15.5	14.1	14.1	66.785	0	6.5855	5562600000	15	588	66785.6	P14733	P14733	Lamin-B1	Lmnb1
2.20232e+06	3.51442e+06	1.62793e+06	266406	461496	870284	1096640	452645	2.44822e+06	629494	-	-	5	5	5	14.4	14.4	14.4	41.29	0	31.814	6065800000	22	362	41290.4	Q8BTU6;P60843;P10630;E9Q561;D6RJ60;D6RJ11;A0A0N4SVM5;A2AFK7;E9PV04;A0A0N4SVP8;Q91VC3	Q8BTU6;P60843;P10630	Eukaryotic initiation factor 4A-I;Eukaryotic initiation factor 4A-II;Eukaryotic initiation factor 4A-II, N-terminally processed	Eif4a2;Eif4a1
1.946e+06	2.10435e+06	1.55566e+06	478286	473739	455564	589512	1131860	1.86867e+06	625792	-	-	4	4	4	17.6	17.6	17.6	42.785	0	119.74	5800000000	34	393	42785.4	P70404	P70404	Isocitrate dehydrogenase [NAD] subunit gamma 1, mitochondrial	Idh3g
3.8098e+06	4.43913e+06	3.50624e+06	156403	428158	871602	1290010	370969	3.91839e+06	623428	-	-	7	6	6	46	40.4	40.4	21.778	0	18.331	5217100000	24	198	21778.7	Q61171;D3Z4A4	Q61171;D3Z4A4	Peroxiredoxin-2	Prdx2
2.86451e+06	4.30183e+06	2.83235e+06	272401	146155	1786940	446705	462545	3.3329e+06	622949	-	-	7	7	7	30.4	30.4	30.4	36.033	0	112.35	7237100000	22	332	36033.6	M0QW57;Q3MI48;M0QW84	M0QW57;Q3MI48	Junctional sarcoplasmic reticulum protein 1	Jsrp1
1.07615e+06	1.45735e+06	1.16772e+06	397593	270970	892238	502541	1026630	1.23374e+06	617994	-	-	8	8	8	17.6	17.6	17.6	66.113	0	82.131	5948600000	39	608	66113.7	B1AU25;Q9Z0X1	B1AU25;Q9Z0X1	Apoptosis-inducing factor 1, mitochondrial	Aifm1
5.57375e+06	1.78474e+06	4.37342e+06	106205	225867	689044	150762	1888240	3.91064e+06	612024	-	-	2	2	2	10.6	10.6	10.6	21.447	0	323.31	6542500000	13	189	21447.1	G3X8R0;Q60870	G3X8R0;Q60870	Receptor expression-enhancing protein;Receptor expression-enhancing protein 5	Reep5
1.64979e+06	3.06278e+06	2.40609e+06	501653	232958	1141860	589264	521925	2.37289e+06	597532	-	-	7	7	7	34.7	34.7	34.7	32.081	0	66.789	6040600000	22	291	32081.7	P82348;F6YKG7	P82348	Gamma-sarcoglycan	Sgcg
6.46063e+06	8.97703e+06	1.21905e+07	1027140	926750	246565	607638	123213	9.20939e+06	586261	-	-	9	1	1	100	13.3	13.3	6.9267	0	14.184	4920200000	0	60	6926.78	F6ULR7	F6ULR7		Mylpf
4.76412e+06	6.17685e+06	4.33316e+06	413010	351997	571858	765737	812322	5.09137e+06	582985	-	-	6	6	6	42	42	42	21.024	0	59.068	7395700000	17	176	21023.8	Q9DCS9;D3YUK4	Q9DCS9;D3YUK4	NADH dehydrogenase [ubiquinone] 1 beta subcomplex subunit 10	Ndufb10
2.3429e+06	2.87002e+06	1.94451e+06	569403	277234	996366	493536	520965	2.38581e+06	571501	-	-	9	9	9	35	35	35	41.829	0	71.893	7254400000	61	397	41829.9	Q8BWT1	Q8BWT1	3-ketoacyl-CoA thiolase, mitochondrial	Acaa2
1.41449e+06	2.34997e+06	1.82082e+06	477309	532379	446379	672563	707758	1.86176e+06	567278	-	-	4	4	4	16.1	16.1	16.1	35.294	0.0015314	3.189	4799300000	7	323	35294.7	Q922B1	Q922B1	O-acetyl-ADP-ribose deacetylase MACROD1	Macrod1
3.0289e+06	3.43963e+06	2.23396e+06	276932	207013	1001950	619436	684129	2.90083e+06	557892	-	-	6	6	6	21.8	21.8	21.8	36.213	0	78.048	6661300000	16	335	36213.8	Q9CQ62	Q9CQ62	2,4-dienoyl-CoA reductase, mitochondrial	Decr1
1.11302e+06	1.35692e+06	689531	188677	281797	642793	373213	1279370	1.05316e+06	553170	-	-	8	8	8	22.1	22.1	22.1	51.349	0	40.27	4608200000	33	471	51349.7	A0A0G2JEU1;P47738;D3YYF3;A0A0G2JFQ0;A0A0G2JF60;Q62148	A0A0G2JEU1;P47738;D3YYF3	Aldehyde dehydrogenase, mitochondrial	Aldh2
196285	232949	182483	359830	267534	936495	631805	566538	203906	552440	-	-	17	17	17	7	7	7	405.57	0	82.537	5533600000	41	3676	405578	E9QLJ0;Q70KF4	E9QLJ0;Q70KF4	Cardiomyopathy-associated protein 5	Cmya5
27605.5	26531.8	15902.7	325848	268112	732584	526773	908792	23346.7	552422	-	-	1491	1	0	54.3	0	0	3716	0.001506	2.9061	5838400000	21	33467	3716060	E9Q8K5;E9Q8N1;F6RSJ3;A2AT65;Q8BUJ6;A2AT64;REV__Q8K1T1;Q3TYJ3;D3Z0M6;REV__F7BWD7;REV__E9QPW4;REV__Q8BQ48;REV__A0A1N9NPH8;O88485;Q6PGC1	E9Q8K5;E9Q8N1		Ttn
1.08658e+07	6.40317e+06	1.03973e+07	765027	491381	111312	1022930	361634	9.22209e+06	550457	-	-	3	3	3	41.4	41.4	41.4	13.02	0	209.2	6473400000	27	116	13019.8	P52503	P52503	NADH dehydrogenase [ubiquinone] iron-sulfur protein 6, mitochondrial	Ndufs6
1.12271e+06	22251.6	NaN	NaN	201.334	1144350	380587	627189	572483	538082	-	-	1	1	1	3.1	3.1	3.1	35.616	0.0038217	1.6537	2866500000	6	318	35616.4	A0A087WRX7;O35618	A0A087WRX7;O35618	Protein Mdm4	Mdm4
4.68402e+06	6.17873e+06	6.25868e+06	272552	226382	869140	623957	676714	5.70714e+06	533749	-	-	4	4	2	34.1	34.1	20.3	15.025	0	8.8499	6114300000	11	138	15025.2	Q5SW87;Q5SW88;P62821;Q5SW86;Q3TYH2;Q9DD03;P61028;P55258;Q8K386	Q5SW87;Q5SW88;P62821;Q5SW86	Ras-related protein Rab-1A	Rab1;Rab1A
1.38423e+06	889732	1.27411e+06	83195.6	20779	1795800	300530	437349	1.18269e+06	527531	-	-	1	1	1	4	4	4	28.523	0.0027972	2.174	2719600000	6	248	28523.5	B9EHK9;Q9QY80	B9EHK9;Q9QY80	Very-long-chain (3R)-3-hydroxyacyl-CoA dehydratase 1	Hacd1
4.04533e+06	6.52067e+06	3.72611e+06	203565	201167	939919	1053600	199260	4.76403e+06	519502	-	-	3	3	3	18.6	18.6	18.6	19.462	0	16.25	5178000000	13	172	19462.2	P63028;D3YU75	P63028;D3YU75	Translationally-controlled tumor protein	Tpt1
3.28285e+06	2.94264e+06	3.36839e+06	483586	323931	458934	700876	612900	3.19796e+06	516045	-	-	8	8	8	34.6	34.6	34.6	29.82	0	10.586	6925100000	21	272	29820.1	P67778;Q5SQG5	P67778;Q5SQG5	Prohibitin	Phb
1.60376e+06	2.67422e+06	1.3951e+06	306954	464520	600878	724830	409016	1.89102e+06	501240	-	-	9	9	9	21.3	21.3	21.3	54.079	0	52.917	6007000000	28	503	54079.3	P97384;D3Z7U0	P97384;D3Z7U0	Annexin A11;Annexin	Anxa11
879560	1.33184e+06	575092	286643	446527	535424	837057	357342	928829	492599	-	-	8	8	8	11.1	11.1	11.1	117.81	0	221.02	5871200000	52	1058	117809	Q02053;P31254	Q02053	Ubiquitin-like modifier-activating enzyme 1	Uba1
487144	700658	500011	237415	226640	858486	515389	592767	562604	486139	-	-	8	8	8	8.6	8.6	8.6	121.43	0	7.62	4794300000	19	1089	121435	Q99MR9	Q99MR9	Protein phosphatase 1 regulatory subunit 3A	Ppp1r3a
889625	1.48682e+06	1.51517e+06	310148	267597	593355	612380	593170	1.29721e+06	475330	-	-	6	6	6	17.9	17.9	17.9	48.435	0	41.053	5735000000	25	418	48435.4	F6QYE1;O09161;E9PZ67	F6QYE1;O09161;E9PZ67	Calsequestrin;Calsequestrin-2	Casq2
5.95017e+10	1.59162e+10	5.26029e+10	334187	433539	427199	798973	322973	4.26736e+10	463374	-	+	4	4	3	14.1	14.1	12	49.039	0	31.568	4222000000	20	NaN	1	sp|P01008ups|ANT3_HUMAN_UPS;P32261	sp|P01008ups|ANT3_HUMAN_UPS
3.38561e+06	3.00773e+06	2.27068e+06	246351	247605	403164	778613	640265	2.88801e+06	463200	-	-	5	5	5	23.9	23.9	23.9	32.25	0	79.024	6348900000	30	289	32250.4	P42125	P42125	Enoyl-CoA delta isomerase 1, mitochondrial	Eci1
1.00165e+06	1.37874e+06	1.03275e+06	273634	146341	893429	433619	524188	1.13771e+06	454242	-	-	8	8	8	14.3	14.3	14.3	81.163	0	8.5621	5761000000	23	727	81164.5	Q3TVI8;D3YY15;D3Z2F0;D3YUE1	Q3TVI8	Pre-B-cell leukemia transcription factor-interacting protein 1	Pbxip1
1.33344e+06	1.42802e+06	1.41497e+06	118187	139927	1017220	336389	658545	1.39215e+06	454054	-	-	6	6	6	23.5	23.5	23.5	32.133	0	26.464	4502000000	28	289	32133.4	P82347;A2ACH6	P82347;A2ACH6	Delta-sarcoglycan	Sgcd
2.95044e+06	2.89145e+06	2.26851e+06	338866	30505.1	530265	590348	753572	2.70347e+06	448711	-	-	7	7	7	29	29	29	40.603	0	21.037	6197900000	19	355	40603.4	Q99LC3;A0A087WR38	Q99LC3	NADH dehydrogenase [ubiquinone] 1 alpha subcomplex subunit 10, mitochondrial	Ndufa10
547442	NaN	614971	106177	394031	312756	331153	1052480	581207	439319	-	-	51	1	1	53.4	0.9	0.9	137.67	0	19.367	4311800000	3	1190	137671	F6RDH3	F6RDH3		Neb
2.58067e+06	1.83784e+06	5.94162e+06	NaN	224815	967288	183374	336269	3.45338e+06	427936	-	-	1	1	1	7.5	7.5	7.5	14.694	0	10.975	3994600000	3	133	14694.6	G3UYV5;A2ARA8	G3UYV5;A2ARA8	Integrin alpha-8;Integrin alpha-8 heavy chain;Integrin alpha-8 light chain	Itga8
3.18665e+06	4.36627e+06	3.84278e+06	344653	377990	482076	210875	706200	3.79857e+06	424359	-	-	5	5	5	15.9	15.9	15.9	34.155	0	14.929	7799100000	17	314	34154.9	Q9CR62;Q5SX46;Q5SX48	Q9CR62;Q5SX46	Mitochondrial 2-oxoglutarate/malate carrier protein	Slc25a11
307890	225273	190003	135200	49305.9	45603	162829	1674120	241055	413412	-	-	8	8	8	25.4	25.4	25.4	38.676	0	323.31	4949500000	19	339	38676.2	P07356;B0V2N8;B0V2N7;B0V2N5	P07356;B0V2N8;B0V2N7	Annexin A2;Annexin	Anxa2
1.99132e+06	2.93688e+06	1.97361e+06	222437	158046	466280	498689	671866	2.3006e+06	403464	-	-	4	4	4	23.4	23.4	23.4	20.987	0	4.2551	4271400000	11	184	20987.2	P62835;A0A0G2JDL9;A0A0G2JE52;Q99JI6;A0A1W2P777;A0A0G2JED9	P62835;A0A0G2JDL9;A0A0G2JE52;Q99JI6	Ras-related protein Rap-1A;Ras-related protein Rap-1b	Rap1a;Rap1b
1.43159e+07	1.45386e+07	1.64688e+07	399284	509767	449669	567817	89020.5	1.51078e+07	403112	-	-	1	1	1	17.9	17.9	17.9	7.6016	0	7.5371	6653300000	8	67	7601.63	A0A0U1RPI1;Q9Z239	A0A0U1RPI1;Q9Z239	Phospholemman	Fxyd1
1.80032e+07	2.06454e+07	1.27656e+07	NaN	NaN	173726	226263	784156	1.71381e+07	394715	-	-	1	1	1	54.1	54.1	54.1	4.0944	0	23.839	3186600000	2	37	4094.47	V9GX15;E9PUX1;E9PVP5;A0A0R4J206	V9GX15;E9PUX1;E9PVP5;A0A0R4J206		Mocs2
1.54777e+06	1.51378e+06	1.29299e+06	102421	58107.3	772574	652464	344221	1.45151e+06	385957	-	-	6	6	6	18.4	18.4	18.4	46.875	0	49.055	4032400000	52	412	46875.6	E9QND8;Q6PA06	E9QND8;Q6PA06	Atlastin-2	Atl2
106412	102599	109321	154166	117934	178340	393797	1075350	106111	383917	-	-	21	21	21	8.1	8.1	8.1	353.93	0	135.47	7090400000	51	3284	353932	E9PWQ3;J3QQ16;A0A087WS16;D3YWD1	E9PWQ3;J3QQ16;A0A087WS16;D3YWD1		Col6a3
1.20476e+06	1.36766e+06	1.23376e+06	323836	184358	66543.5	555666	760508	1.26872e+06	378182	-	-	6	6	6	8.3	8.3	8.3	88.93	0	6.6787	5992300000	18	793	88931	A0A1B0GRA5;A0A1B0GR78;P70302;A0A1B0GQZ3	A0A1B0GRA5;A0A1B0GR78;P70302	Stromal interaction molecule 1	Stim1
2.33874e+06	2.95364e+06	2.40484e+06	231092	181815	571888	407708	497526	2.56574e+06	378006	-	-	5	5	5	17.3	17.3	17.3	32.625	0	10.765	4694300000	24	283	32625.5	D3YV81;F6UV57;F6YCM8;F8WIH0;D3Z7V3;H7BX64;Q3URD3	D3YV81;F6UV57;F6YCM8;F8WIH0;D3Z7V3;H7BX64;Q3URD3	Sarcolemmal membrane-associated protein	Slmap
3.53301e+06	5.09881e+06	4.32263e+06	165996	134623	671582	471120	424501	4.31815e+06	373564	-	-	4	4	2	28.5	28.5	21.9	17.358	0	32.424	4918000000	10	151	17358.4	P51637	P51637	Caveolin-3	Cav3
770502	939154	581150	250398	157855	330112	496226	594245	763602	365767	-	-	9	9	9	16.7	16.7	16.7	76.722	0	19.461	4138400000	27	707	76723.1	P09405	P09405	Nucleolin	Ncl
3.4859e+10	6.73754e+09	1.38074e+10	161858	311276	546027	199087	582140	1.8468e+10	360078	-	+	2	2	2	20	20	20	12.429	0	17.628	3148900000	2	NaN	1	sp|P10599ups|THIO_HUMAN_UPS;P10639	sp|P10599ups|THIO_HUMAN_UPS;P10639	Thioredoxin	Txn
5.868e+06	1.52365e+06	3.85513e+06	201270	242653	283214	596970	473062	3.74893e+06	359434	-	-	2	2	2	15.5	15.5	15.5	13.847	0	8.4032	4414600000	10	129	13846.9	Q9D881;P19536;F7C106;A0A0A6YVR0	Q9D881;P19536;F7C106;A0A0A6YVR0	Cytochrome c oxidase subunit 5B, mitochondrial	Cox5b
603514	708491	478925	249487	154319	486441	372813	528749	596976	358362	-	-	7	7	7	10.2	10.2	10.2	117.51	0	132.75	4626800000	55	1100	117515	E9Q3E2;Q8CC35	E9Q3E2;Q8CC35	Synaptopodin	Synpo
15587.6	76187.8	54972.5	NaN	801.878	6992.13	2531.8	1389610	48915.9	349984	-	-	2	2	2	2.9	2.9	2.9	88.231	0	4.0536	1108100000	1	798	88231.3	P09055	P09055	Integrin beta-1	Itgb1
1.69496e+06	2.08597e+06	1.28535e+06	204832	157461	549510	261382	561922	1.68876e+06	347021	-	-	5	5	5	21.4	21.4	21.4	31.474	0	117.56	3992400000	36	290	31474.4	Q8BH95	Q8BH95	Enoyl-CoA hydratase, mitochondrial	Echs1
1.52839e+06	1.85006e+06	1.33674e+06	376735	245614	482579	261332	360207	1.57173e+06	345293	-	-	6	6	5	21	21	18.9	52.576	0	130.1	5194600000	66	477	52576.7	A2A542;A2A545;A2A543;A0A0R4J194;Q8R3Z5;A0A0A6YWX5;J3QK20;C7IVS7;Q8R0S4;Q8CC27	A2A542;A2A545;A2A543;A0A0R4J194;Q8R3Z5	Voltage-dependent L-type calcium channel subunit beta-1	Cacnb1
1.39338e+06	1.54398e+06	978403	134767	142973	502198	235746	672923	1.30525e+06	337721	-	-	4	4	4	9.1	9.1	9.1	48.562	0.0015267	3.1734	3713300000	14	440	48562.5	B2M1R6;P61979;H3BLL4;H3BK96;H3BKD0;H3BJ43;Q8BT23;H3BKI8;H3BLP7	B2M1R6;P61979;H3BLL4;H3BK96;H3BKD0	Heterogeneous nuclear ribonucleoprotein K	Hnrnpk
1.42087e+06	2.08383e+06	1.58292e+06	217265	227203	562608	343280	336540	1.69587e+06	337379	-	-	5	5	5	7.9	7.9	7.9	74.691	0	29.618	6670100000	16	696	74692.1	Q9ET78	Q9ET78	Junctophilin-2	Jph2
1.22255e+06	1.28383e+06	994541	248919	155571	427974	340787	511277	1.16697e+06	336906	-	-	8	8	8	25.9	25.9	25.9	46.839	0	20.341	4220800000	11	433	46840	Q9Z2I8;A0A0N4SWD1	Q9Z2I8	Succinyl-CoA ligase [GDP-forming] subunit beta, mitochondrial	Suclg2
659340	1.20185e+06	909034	89003.2	311343	590164	112980	579806	923408	336659	-	-	3	3	3	7.1	7.1	7.1	41.408	0.0014388	2.42	3554300000	4	382	41408.8	E9QKR0;P62880;D3Z1T4;D3Z1M1;D3YZX3;P29387;P62874;A0A0A6YVN9;V9GWY1;H3BLF7;E9PWM7;H3BKR2;Q61011	E9QKR0;P62880;D3Z1T4;D3Z1M1;D3YZX3;P29387;P62874	Guanine nucleotide-binding protein G(I)/G(S)/G(T) subunit beta-2;Guanine nucleotide-binding protein subunit beta-4;Guanine nucleotide-binding protein G(I)/G(S)/G(T) subunit beta-1	Gnb2;Gnb4;Gnb1
2.07982e+06	3.83287e+06	2.64135e+06	265783	140023	382334	471806	395076	2.85135e+06	331004	-	-	4	4	4	26.1	26.1	26.1	26.981	0	104.75	4726300000	44	245	26981.5	Q8R4E4;E9QJU4	Q8R4E4;E9QJU4	Myozenin-3	Myoz3
1.13837e+06	1.3222e+06	832248	127066	238976	367536	637080	267762	1.09761e+06	327684	-	-	6	6	6	10.4	10.4	10.4	80.336	0	22.467	4775700000	44	702	80336.6	F6ZHD8;Q9D6Y9;G3UW30	F6ZHD8;Q9D6Y9;G3UW30	1,4-alpha-glucan-branching enzyme	Gbe1
4.43491e+06	3.02067e+06	3.42029e+06	366021	207533	153953	745352	152289	3.62529e+06	325030	-	-	6	6	6	54.5	54.5	54.5	25.66	0	140.3	5266900000	40	224	25660.1	Q9WV35	Q9WV35	Probable C->U-editing enzyme APOBEC-2	Apobec2
1.12274e+06	1.02953e+06	1.01603e+06	84139.8	94326.6	459153	355044	630213	1.0561e+06	324575	-	-	6	6	6	13.7	13.7	13.7	61.16	0	12.27	4371500000	11	556	61160.7	Q6PF96;Q921G7	Q6PF96;Q921G7	Electron transfer flavoprotein-ubiquinone oxidoreductase, mitochondrial	Etfdh
682654	1.28075e+06	606020	149398	329385	356097	496057	265056	856475	319199	-	-	7	7	4	12.9	12.9	8.2	68.542	0	33.832	3730200000	38	583	68542.8	P26043	P26043	Radixin	Rdx
3.81129e+06	3.4881e+06	3.84529e+06	113571	158339	541531	498647	281057	3.71489e+06	318629	-	-	5	5	4	20.1	20.1	15.3	27.855	0	12.547	5867700000	15	249	27855.3	Q9WV55	Q9WV55	Vesicle-associated membrane protein-associated protein A	Vapa
3.60081e+06	3.89922e+06	3.92539e+06	403298	209412	364809	269789	322068	3.80847e+06	313875	-	-	4	4	4	29.8	29.8	29.8	15.283	0	6.1426	4283900000	11	131	15282.8	Q9CQZ5	Q9CQZ5	NADH dehydrogenase [ubiquinone] 1 alpha subcomplex subunit 6	Ndufa6
1.28585e+06	1.71224e+06	1.16816e+06	225789	299660	297219	242018	502585	1.38875e+06	313454	-	-	13	6	6	33.3	19.3	19.3	50.113	0	16.291	3952600000	32	462	50113.8	P10126;D3YZ68;D3Z3I8	P10126	Elongation factor 1-alpha 1	Eef1a1
827198	1.80496e+06	911185	165637	99070.8	478589	335581	458072	1.18111e+06	307390	-	-	8	8	3	20.9	20.9	8.4	54.103	0	103.57	4261900000	37	479	54103.7	Q5SVI9;Q5SVJ1;Q5SVI3;Q5SVI0;Q5SVI2;Q68EG2;Q5SVI1;Q5SVJ0;P28652;F6WHR9	Q5SVI9;Q5SVJ1;Q5SVI3;Q5SVI0;Q5SVI2;Q68EG2;Q5SVI1;Q5SVJ0;P28652	Calcium/calmodulin-dependent protein kinase type II subunit beta	Camk2b
352940	466277	590909	145636	172523	532640	295773	362302	470042	301775	-	-	1	1	1	1.5	1.5	1.5	76.365	0.0026991	1.9152	2824400000	7	722	76366.3	A0A0N4SWH8;Q3TES0	A0A0N4SWH8;Q3TES0	IQ motif and SEC7 domain-containing protein 3	Iqsec3
152627	191172	175227	171355	150877	364430	335875	474625	173009	299432	-	-	10	10	10	5.2	5.2	5.2	328.32	0	116.12	3996600000	44	3010	328324	A0A087WSE3;E9QQ25;Q62407;A0A0R4J1J0	A0A087WSE3;E9QQ25;Q62407	Striated muscle-specific serine/threonine-protein kinase	Speg
576095	742128	467582	137717	202194	553413	455693	143454	595268	298494	-	-	8	8	8	15	15	15	81.44	0	10.248	3144800000	21	754	81440.9	Q8CE80;P51125	Q8CE80;P51125	Calpastatin	Cast
1.60281e+06	2.92972e+06	1.50088e+06	98239.2	93764.7	466500	673442	143428	2.01114e+06	295075	-	-	7	7	6	17.4	17.4	15.2	46.674	0	9.5567	4329000000	21	414	46674.4	O88844;D3YVY3;A0A087WPT4;A0A087WRS9;A0A087WRM4	O88844	Isocitrate dehydrogenase [NADP] cytoplasmic	Idh1
1.20727e+06	1.89003e+06	1.12448e+06	151997	194476	476530	479051	173013	1.40726e+06	295013	-	-	5	5	5	11	11	11	65.322	0	95.857	5089100000	11	589	65322.6	Q76MZ3;G3UWL2	Q76MZ3	Serine/threonine-protein phosphatase 2A 65 kDa regulatory subunit A alpha isoform	Ppp2r1a
1.7438e+06	1.48709e+06	1.19993e+06	NaN	8109.49	NaN	17361.7	854634	1.47694e+06	293368	-	-	2	2	2	10.4	10.4	10.4	17.229	0.0085055	1.4443	1493300000	4	154	17229.7	Q9QZ57	Q9QZ57	Heat shock protein beta-3	Hspb3
4.76206e+06	5.59543e+06	5.39042e+06	106974	79900.5	546992	333877	349678	5.2493e+06	283484	-	-	1	1	1	10.6	10.6	10.6	11.692	0	33.742	4211600000	19	104	11692.2	Q9CQZ6	Q9CQZ6	NADH dehydrogenase [ubiquinone] 1 beta subcomplex subunit 3	Ndufb3
1.19967e+07	1.35379e+07	7.35274e+06	86799.4	105085	252686	307798	651934	1.09625e+07	280860	-	-	3	3	3	22.1	22.1	22.1	16.085	0	4.6448	7119100000	19	145	16085.5	Q9CZX8;S4R223;D3YUT3;D3YUG3;D3Z5R8;D3Z722	Q9CZX8;S4R223;D3YUT3;D3YUG3;D3Z5R8;D3Z722	40S ribosomal protein S19	Rps19
1.62739e+06	2.42927e+06	2.21095e+06	233158	137145	426932	259362	336864	2.0892e+06	278692	-	-	5	5	5	27.4	27.4	27.4	23.547	0	4.7966	3603200000	7	212	23547.5	P53994;Q3TEG7;P59279;G3UXQ7;G3V022;A0A1D5RMH1;S4R232	P53994;Q3TEG7;P59279	Ras-related protein Rab-2A;Ras-related protein Rab-2B	Rab2a;Rab2b
3.04178e+06	3.88141e+06	3.95733e+06	118285	14274.5	111426	534209	600357	3.62684e+06	275710	-	-	2	2	2	15.3	15.3	15.3	17.937	0	20.637	4013200000	16	157	17936.7	S4R1E5;F7A8H6;O70325;Q91XR9	S4R1E5;F7A8H6;O70325;Q91XR9	Glutathione peroxidase;Phospholipid hydroperoxide glutathione peroxidase, mitochondrial;Phospholipid hydroperoxide glutathione peroxidase, nuclear	Gpx4
725727	1.21097e+06	542995	NaN	NaN	NaN	378800	170309	826564	274554	-	-	2	2	2	11.2	11.2	11.2	25.147	0	5.2794	1247600000	6	224	25147.8	Q62446	Q62446	Peptidyl-prolyl cis-trans isomerase FKBP3	Fkbp3
308291	391647	225700	107115	94685.7	449859	334298	372168	308546	271625	-	-	11	11	10	6.5	6.5	6.2	271.66	0	99.645	4824100000	31	2542	271667	E9PUM4;A0A1L1SQ51;Q71LX4;Q8CDM9;A0A1L1SRI1;A0A1L1SQP9	E9PUM4;A0A1L1SQ51;Q71LX4;Q8CDM9;A0A1L1SRI1	Talin-2	Tln2
3.84865e+06	2.53699e+06	2.64591e+06	150076	198874	209628	677320	106404	3.01052e+06	268460	-	-	5	5	5	46.2	46.2	46.2	20.374	0	71.203	3900100000	22	182	20374.7	Q99PR8	Q99PR8	Heat shock protein beta-2	Hspb2
2.31696e+10	NaN	1.60575e+10	71029.2	68702.6	NaN	701335	228751	1.96135e+10	267454	-	+	3	2	1	3.8	2.7	1.2	75.181	0	11.673	1840600000	6	NaN	1	sp|P02787ups|TRFE_HUMAN_UPS	sp|P02787ups|TRFE_HUMAN_UPS
3.83582e+06	5.17658e+06	3.61162e+06	295129	279186	243579	302292	214851	4.20801e+06	267007	-	+	3	3	3	27.6	27.6	27.6	11.605	0	15.45	3657500000	8	105	11605.4	P62897;sp|P99999ups|CYC_HUMAN_UPS;CON__P62894;P00015	P62897	Cytochrome c, somatic	Cycs
1.51433e+06	1.98129e+06	1.38212e+06	108887	157179	215087	519224	312176	1.62591e+06	262511	-	-	7	7	7	28.2	28.2	28.2	38.751	0	42.487	3711200000	15	348	38751.6	Q8K1K2;P62196	Q8K1K2;P62196	26S protease regulatory subunit 8	Psmc5
1.5719e+06	2.76595e+06	1.67391e+06	234960	275783	297266	377420	116326	2.00392e+06	260351	-	-	3	3	3	12.6	12.6	12.6	25.378	0	19.735	3300700000	3	238	25378.7	Q60692	Q60692	Proteasome subunit beta type-6	Psmb6
767381	1.05642e+06	678315	116948	201390	311804	483917	140782	834037	250968	-	-	15	8	8	17.7	10.4	10.4	117.43	0	10.369	4927500000	18	1125	117429	P27546;A0A0G2JDN7;E9PZ43;A0A140T8T5;A0A0G2JFT4;A0A0G2JG35;Q78TF3;A0A0G2JFK3;A0A0G2JDY5;A0A0G2JE57;A0A0G2JDU1	P27546	Microtubule-associated protein 4	Map4
544863	777992	123397	435105	164223	371768	NaN	26245.5	482084	249335	-	-	2	2	2	1.8	1.8	1.8	124.84	0.0027211	1.9779	3587500000	8	1122	124845	Q80V94	Q80V94	AP-4 complex subunit epsilon-1	Ap4e1
512565	498951	530461	161614	137250	239482	311643	373050	513993	244608	-	-	7	7	7	9.7	9.7	9.7	110.97	0	28.226	3642700000	5	992	110972	A6H644;Q8BG95;A0A1W2P750;Q9DBR7	A6H644;Q8BG95	Protein phosphatase 1 regulatory subunit;Protein phosphatase 1 regulatory subunit 12B	Ppp1r12b
1.31801e+06	1.34334e+06	976081	72251.7	57574.6	679326	87652.6	320084	1.21248e+06	243378	-	-	9	9	9	21.7	21.7	21.7	49.508	0	27.445	3955500000	34	452	49508.3	Q8BFR5;A0A0U1RNQ6;A0A0U1RPC4	Q8BFR5	Elongation factor Tu, mitochondrial	Tufm
426910	821008	279461	137479	77172.4	151954	487832	353658	509126	241619	-	-	11	11	11	14.5	14.5	14.5	123.69	0	16.725	3354600000	28	1132	123696	E9QQ93;O70373	E9QQ93;O70373	Xin actin-binding repeat-containing protein 1	Xirp1
5.98869e+06	7.13347e+06	4.90262e+06	157093	189977	179816	386949	278956	6.00826e+06	238558	-	-	1	1	1	19.7	19.7	19.7	8.1066	0	17.712	3202700000	20	71	8106.72	D3YVB4;D3Z712;F8WJ41;P62245	D3YVB4;D3Z712;F8WJ41;P62245	40S ribosomal protein S15a	Rps15a
1.01594e+06	1.57601e+06	1.00886e+06	187063	26.9512	608892	133482	251285	1.20027e+06	236150	-	-	1	1	1	2.8	2.8	2.8	28.616	0	19.261	2609700000	1	250	28616	M0QWK8;A6H692;E9QMW4	M0QWK8;A6H692;E9QMW4	Uncharacterized protein C16orf96 homolog	4930562C15Rik
737634	1.0417e+06	617362	99330.7	62757.8	583289	167210	266392	798899	235796	-	-	7	7	7	15.1	15.1	15.1	61.84	0	44.845	3454000000	10	562	61840.6	Q8CHT0	Q8CHT0	Delta-1-pyrroline-5-carboxylate dehydrogenase, mitochondrial	Aldh4a1
2.1858e+06	4.64869e+06	2.64685e+06	119264	132777	126536	322382	473720	3.16045e+06	234936	-	-	3	3	3	21.2	21.2	21.2	16.564	0	30.333	3605000000	14	151	16564.2	Q9D6K8	Q9D6K8	FUN14 domain-containing protein 2	Fundc2
950936	3.93996e+06	1.59343e+06	91114.8	201770	546642	164444	157679	2.16144e+06	232330	-	-	3	3	3	14.3	14.3	14.3	28.655	0	5.0605	3060600000	3	258	28655.5	E9PZ58;P97355	E9PZ58;P97355	Spermine synthase	Sms
1.16992e+06	1.52698e+06	1.19609e+06	115627	165538	543398	166319	124197	1.29766e+06	223016	-	-	3	3	3	12.1	12.1	12.1	29.885	0.001497	2.8281	2811400000	5	264	29884.9	P97351	P97351	40S ribosomal protein S3a	Rps3a
1.07759e+06	286216	898833	165022	216275	78579.6	555623	93873.9	754214	221875	-	-	1	1	1	2.1	2.1	2.1	61.612	0	27.331	3157200000	6	561	61612.3	Q91WU0;Q8VCC2	Q91WU0;Q8VCC2	Carboxylic ester hydrolase;Liver carboxylesterase 1	Ces1f;Ces1
5926.56	37187.8	60918.4	30087.5	537.765	5714.96	1489.84	1068520	34677.6	221270	-	-	5	5	5	14.5	14.5	14.5	42.572	0.0015798	3.4456	1372900000	5	373	42572.5	Q99MQ4	Q99MQ4	Asporin	Aspn
1.39167e+06	2.32524e+06	2.05001e+06	94350.8	93805.6	284341	345392	285296	1.9223e+06	220637	-	-	3	3	3	14.7	14.7	14.7	21.397	0.0014925	2.7817	2976000000	6	184	21397.1	Q6ZWZ7;Q9CPR4;B2RY53	Q6ZWZ7;Q9CPR4	60S ribosomal protein L17	Rpl17
3.59003e+06	2.96054e+06	3.60203e+06	335555	337373	17893.6	147398	260217	3.3842e+06	219687	-	-	2	2	2	9.4	9.4	9.4	24.038	0.0026455	1.8445	5110500000	5	212	24038.3	Q8K3J1	Q8K3J1	NADH dehydrogenase [ubiquinone] iron-sulfur protein 8, mitochondrial	Ndufs8
168493	279772	301739	240010	127800	245474	165670	312843	250001	218359	-	-	9	9	9	5.9	5.9	5.9	237.19	0	24.362	3774800000	19	2082	237190	E9QL12;E9PXU9;A0A0N4SWH3;A0A0N4SWG7;A0A0N4SUN3;A0A0N4SVX9;Q9ESD7;A0A0N4SUJ2;E9Q423;A0A0N4SV63	E9QL12;E9PXU9;A0A0N4SWH3;A0A0N4SWG7;A0A0N4SUN3;A0A0N4SVX9;Q9ESD7;A0A0N4SUJ2;E9Q423;A0A0N4SV63	Dysferlin	Dysf
1.08415e+06	1.57301e+06	1.28688e+06	29677.3	143536	216189	388884	301261	1.31468e+06	215909	-	-	2	2	2	6.1	6.1	6.1	34.244	0.0026385	1.8353	3052100000	0	293	34244.3	G3UWE1;Q52L67;Q9CY27	G3UWE1;Q52L67;Q9CY27	Very-long-chain enoyl-CoA reductase	Tecr
5.29795e+06	6.41032e+06	5.39433e+06	193350	163311	120267	384746	209860	5.70086e+06	214307	-	-	2	2	2	25	25	25	11.922	0	37.312	4047800000	20	108	11922.6	P26883;F6X9I3	P26883;F6X9I3	Peptidyl-prolyl cis-trans isomerase FKBP1A;Peptidyl-prolyl cis-trans isomerase	Fkbp1a
8.607e+06	1.20919e+07	7.82517e+06	451841	145.752	443558	75735.4	91407.6	9.50803e+06	212538	-	-	2	2	2	21.6	21.6	21.6	10.344	0	10.347	5724700000	7	88	10344.2	P56135;F8WHP8	P56135;F8WHP8	ATP synthase subunit f, mitochondrial	Atp5j2
1.62393e+06	2.16963e+06	2.13984e+06	132497	70781.9	222172	262905	372619	1.9778e+06	212195	-	-	7	7	7	22	22	22	34.134	0	29.478	4072000000	14	305	34134.8	Q9DB73;G3UZG6;G3UXV8;G3UZ57	Q9DB73;G3UZG6	NADH-cytochrome b5 reductase 1	Cyb5r1
573307	777892	555782	64575.2	53967.8	306440	155352	475408	635660	211149	-	-	6	6	6	13.1	13.1	13.1	61.336	0	16.771	3104000000	7	558	61336.8	P26443;F7CFA5	P26443	Glutamate dehydrogenase 1, mitochondrial	Glud1
895322	1.11732e+06	895826	128176	NaN	285631	NaN	214821	969489	209543	-	-	1	1	1	1.3	1.3	1.3	84.669	0.0026247	1.8179	4093500000	2	760	84670.1	Q9JK91	Q9JK91	DNA mismatch repair protein Mlh1	Mlh1
427512	476517	371710	124970	87518.6	180829	317606	329014	425246	207988	-	-	5	5	5	6.2	6.2	6.2	124.61	0	23.96	4151500000	26	1136	124614	G3X9Q1;Q3TZS3;Q61738	G3X9Q1;Q3TZS3;Q61738	Integrin alpha-7;Integrin alpha-7 heavy chain;Integrin alpha-7 light chain	Itga7
915600	962763	949080	124271	89224.6	602120	143152	77576.2	942481	207269	-	-	24	1	1	79.8	5.6	5.6	42.019	0	323.31	3181200000	32	377	42019	P68033;P62737;P63268;D3YZY0;D3Z2K3;A0A1D5RM20;A0A0U1RQ96	P68033;P62737;P63268;D3YZY0;D3Z2K3	Actin, alpha cardiac muscle 1;Actin, aortic smooth muscle;Actin, gamma-enteric smooth muscle	Actc1;Acta2;Actg2
623430	736911	475399	159866	115308	230853	125640	394405	611913	205214	-	-	8	8	8	17.1	17.1	17.1	67.277	0	154.33	3011400000	18	591	67277.9	P35564	P35564	Calnexin	Canx
281362	373910	211585	101353	138988	335647	295650	154064	288952	205140	-	-	5	5	5	4.4	4.4	4.4	170.08	0	20.47	2998400000	23	1512	170079	Q8CGC7;A0A0A6YWH3;A0A0A6YWA4	Q8CGC7	Bifunctional glutamate/proline--tRNA ligase;Glutamate--tRNA ligase;Proline--tRNA ligase	Eprs
963106	1.07001e+06	747984	2610.54	2871.95	597914	209596	208747	927035	204348	-	-	5	5	5	18.5	18.5	18.5	31.419	0.0015291	3.1744	1994900000	5	270	31419.6	P14148;F6XI62	P14148;F6XI62	60S ribosomal protein L7	Rpl7
1.46947e+06	2.52425e+06	1.2505e+06	146306	117433	227875	150163	377186	1.74807e+06	203793	-	+	7	7	7	23.2	23.2	23.2	35.752	0	43.05	4351000000	23	319	35752.4	P48036;A0A0G2JGQ0;sp|P08758ups|ANXA5_HUMAN_UPS	P48036	Annexin A5	Anxa5
776745	603144	659079	122768	82297.5	230150	305722	262953	679656	200778	-	-	6	6	6	10.3	10.3	10.3	77.969	0	6.1492	3334100000	13	697	77970	Q5ICG5;Q8R1X1;Q91WC3;Q8BYJ0;Q5F2C5;Q8C028;E9Q7Y2;F6WYN6;B1ARG5;B0QZJ6	Q5ICG5;Q8R1X1;Q91WC3;Q8BYJ0;Q5F2C5;Q8C028;E9Q7Y2	Long-chain-fatty-acid--CoA ligase 6	Acsl6
1.63316e+06	1.72038e+06	1.26767e+06	118627	136480	254408	291776	192122	1.5404e+06	198683	-	-	4	4	4	15.4	15.4	15.4	39.877	0	30.321	3431400000	12	364	39877.3	D3YTR7;Q9CYT6	D3YTR7;Q9CYT6	Adenylyl cyclase-associated protein;Adenylyl cyclase-associated protein 2	Cap2
1.17357e+06	2.17673e+06	1.8653e+06	100995	117960	302052	273927	195027	1.73853e+06	197992	-	-	3	3	3	21.1	21.1	21.1	17.671	0.0027701	2.092	2295900000	7	152	17671.6	F6YVP7;P62270;S4R1N6	F6YVP7;P62270;S4R1N6	40S ribosomal protein S18	Gm10260;Rps18
1.17932e+07	1.13683e+07	1.34991e+07	155245	64454.4	370017	118288	278621	1.22202e+07	197325	-	-	4	4	4	77.6	77.6	77.6	5.8765	0	10.183	4522200000	14	49	5876.6	A0A0N4SVQ1;Q62425	A0A0N4SVQ1;Q62425	Cytochrome c oxidase subunit NDUFA4	Ndufa4
3.93199e+06	29034.7	2.46377e+06	129887	7156.12	44203	23982.3	779549	2.1416e+06	196955	-	-	5	5	5	19.8	19.8	19.8	27.651	0	36.138	8996300000	8	248	27651.8	E9QK82;P27573	E9QK82;P27573	Myelin protein P0	Mpz
1.43728e+06	2.27316e+06	991957	37456.2	233314	405784	292158	5473.63	1.56747e+06	194837	-	-	5	5	5	17.9	17.9	17.9	39.547	0	11.554	3123000000	20	374	39547.7	P28474;A0A0G2JGS3	P28474	Alcohol dehydrogenase class-3	Adh5
3.32169e+06	2.0662e+06	3.04518e+06	7270.53	15885.3	498545	5243.34	435497	2.81102e+06	192488	-	-	3	3	3	30.5	30.5	30.5	17.444	0	7.5914	3370300000	8	151	17443.8	O09111	O09111	NADH dehydrogenase [ubiquinone] 1 beta subcomplex subunit 11, mitochondrial	Ndufb11
3.40474e+06	3.823e+06	3.70213e+06	212712	141755	198159	176088	195950	3.64329e+06	184933	-	-	3	3	3	37.1	37.1	37.1	13.36	0	214.63	3551200000	19	116	13359.7	Q9CPP6;D3YTQ8	Q9CPP6;D3YTQ8	NADH dehydrogenase [ubiquinone] 1 alpha subcomplex subunit 5	Ndufa5
800336	810587	637187	70607.6	65902.5	287085	147682	340318	749370	182319	-	-	7	7	7	13.9	13.9	13.9	68.644	0	14.968	3416800000	9	605	68645	H7BX88;P47934;B7ZDD7;F7BF80;A2AWJ5	H7BX88;P47934	Carnitine O-acetyltransferase	Crat
2.58377e+06	3.79117e+06	2.04726e+06	110728	99004.3	143305	453763	95261	2.8074e+06	180412	-	-	6	5	5	23.7	20.1	20.1	36.572	0	54.392	4561800000	21	334	36572.3	P16125;D3Z7F0	P16125;D3Z7F0	L-lactate dehydrogenase B chain;L-lactate dehydrogenase	Ldhb
116185	153878	155330	95119.9	46826.9	215025	287434	248790	141798	178639	-	-	9	9	9	6.9	6.9	6.9	202.44	0	23.811	2924300000	19	1834	202442	E9QN70;P02469;E9PYT5	E9QN70;P02469	Laminin subunit beta-1	Lamb1
1.37711e+07	1.76994e+07	1.32515e+07	127056	62338.3	170453	364267	157908	1.49073e+07	176404	-	-	1	1	1	24.3	24.3	24.3	4.4852	0.005	1.5828	4555300000	3	37	4485.26	I7HPX6;Q9CQ69	I7HPX6;Q9CQ69	Cytochrome b-c1 complex subunit 8	Uqcrq
2.45681e+06	2.78128e+06	2.44545e+06	42949.5	27240.7	149929	212266	445976	2.56118e+06	175672	-	-	3	2	2	21	15.5	15.5	22.541	0.0015504	3.2592	3267200000	1	200	22540.9	P61027	P61027	Ras-related protein Rab-10	Rab10
8.10036e+06	6.42123e+06	9.09578e+06	198347	149730	13079	363775	147708	7.87246e+06	174528	-	-	2	2	2	32.4	32.4	32.4	8.2355	0	12.442	4329400000	8	71	8235.6	Q06185;Q8BTB6	Q06185;Q8BTB6	ATP synthase subunit e, mitochondrial	Atp5i;Atp5k
2.27247e+06	475765	612665	43190.4	4032.98	104824	99959.7	618401	1.1203e+06	174082	-	-	2	2	2	2.8	2.8	2.8	85.171	0	323.31	7585200000	7	738	85171.6	G5E8J6;REV__G5E8J6	G5E8J6;REV__G5E8J6		Hrc
1.25032e+06	1.20896e+06	1.10697e+06	115550	123140	252665	230109	148011	1.18875e+06	173895	-	-	7	7	7	17.5	17.5	17.5	60.718	0	27.159	3738400000	15	530	60718.2	P14685;F7B7L8	P14685	26S proteasome non-ATPase regulatory subunit 3	Psmd3
2.06544e+06	2.54543e+06	1.99399e+06	83595	132673	386190	145713	118146	2.20162e+06	173263	-	-	2	2	2	14.5	14.5	14.5	16.057	0	5.4381	2522300000	14	145	16056.8	D3YVM5;P14869;S4R1N1	D3YVM5;P14869;S4R1N1	60S acidic ribosomal protein P0	Rplp0
1.98244e+06	1.80068e+06	1.8293e+06	105233	94555	182743	136397	329104	1.87081e+06	169606	-	-	2	2	2	17.2	17.2	17.2	16.265	0.0015408	3.2362	1871700000	3	145	16264.8	G3X9U9;Q9CQ92;D3YZ32	G3X9U9;Q9CQ92;D3YZ32	Mitochondrial fission 1 protein	Fis1
1.10702e+06	2.46988e+06	1.57199e+06	80054.4	68117.4	137301	455261	103379	1.71629e+06	168823	-	-	3	3	3	11.8	11.8	11.8	28.405	0	9.452	2965400000	11	255	28405.2	O70435;E0CX62	O70435	Proteasome subunit alpha type-3	Psma3
2.10314e+06	2.36004e+06	1.70156e+06	57301	41163.4	470176	211076	62798.6	2.05491e+06	168503	-	-	3	3	3	13.4	13.4	13.4	26.496	0	4.1664	2876100000	5	238	26496.2	A0A1B0GS70;Q9R1P4	A0A1B0GS70;Q9R1P4	Proteasome subunit alpha type-1	Psma1
742227	661492	491221	62338.1	52584.2	253194	281089	182993	631647	166440	-	-	4	1	1	6.2	1.9	1.9	74.466	0.0015152	2.9712	3027200000	14	676	74466.9	Q9QXX4	Q9QXX4	Calcium-binding mitochondrial carrier protein Aralar2	Slc25a13
957162	1.45871e+06	891216	34714.3	38263.4	264758	363189	127155	1.10236e+06	165616	-	-	3	3	2	7.2	7.2	4.9	39.296	0.0014771	2.657	2547800000	2	347	39296.4	O09110;A0A0R4J1Q6	O09110	Dual specificity mitogen-activated protein kinase kinase 3	Map2k3
674255	456798	734115	109910	79664.7	136017	215866	282946	621723	164881	-	-	5	5	5	8.1	8.1	8.1	81.604	0	17.814	3041000000	14	731	81605.4	Q8BJS4	Q8BJS4	SUN domain-containing protein 2	Sun2
2.40029e+06	3.45976e+06	1.85102e+06	111310	213695	155038	272823	71010.2	2.57035e+06	164775	-	-	7	7	7	50	50	50	16.832	0	278.76	2778400000	42	154	16832.2	P63242;J3QPS8;A0A0A0MQM0;Q8BGY2	P63242;J3QPS8;A0A0A0MQM0	Eukaryotic translation initiation factor 5A-1;Eukaryotic translation initiation factor 5A	Eif5a
5.39373e+06	5.71299e+06	4.84667e+06	32646.8	19211.6	505747	196359	65650.3	5.31779e+06	163923	-	-	3	3	3	34.3	34.3	34.3	12.097	0	28.33	3984300000	9	108	12097	Q91WS0	Q91WS0	CDGSH iron-sulfur domain-containing protein 1	Cisd1
1.22436e+06	1.68341e+06	914930	113427	143109	150385	167890	242601	1.27423e+06	163482	-	-	4	4	4	19.1	19.1	19.1	35.608	0	25.323	2880100000	10	309	35608.2	P63330;P62715	P63330;P62715	Serine/threonine-protein phosphatase 2A catalytic subunit alpha isoform;Serine/threonine-protein phosphatase 2A catalytic subunit beta isoform	Ppp2ca;Ppp2cb
375008	261985	232017	275088	226535	121427	5266.43	NaN	289670	157079	-	-	62	3	3	58.7	4.5	4.5	126.56	0	35.669	2088100000	8	1127	126559	D3YU50;F7D574	D3YU50		Mybpc1
693332	1.33587e+06	593504	133933	61919.8	141697	239343	205915	874236	156562	-	-	12	4	3	36.5	11.1	9.4	50.051	0	38.344	2557600000	21	449	50051.5	Q9JJZ2	Q9JJZ2	Tubulin alpha-8 chain	Tuba8
3.4075e+06	4.39017e+06	3.89015e+06	130344	49792.9	230427	213474	150071	3.89594e+06	154822	-	-	3	3	3	34	34	34	11.741	0.0027586	2.0418	3262200000	4	97	11741.5	A2AP32;Q3UIU2	A2AP32;Q3UIU2	NADH dehydrogenase [ubiquinone] 1 beta subcomplex subunit 6	Ndufb6
1.19644e+06	1.44554e+06	1.37312e+06	88106.9	37949.6	222361	254231	165237	1.33836e+06	153577	-	-	2	2	2	8.2	8.2	8.2	27.956	0.0014493	2.4573	2505700000	12	245	27956.6	Q61335	Q61335	B-cell receptor-associated protein 31	Bcap31
NaN	NaN	NaN	112659	124664	NaN	96936.5	280048	NaN	153577	-	-	3	3	3	0.6	0.6	0.6	782.13	0	24.817	928920000	6	6870	782144	E9QP46;Q6ZWQ0;F7BX34;F6W8R9;Q6DFZ2	E9QP46;Q6ZWQ0	Nesprin-2	Syne2
1.98626e+06	2.34066e+06	2.14885e+06	179007	18936.9	334254	129932	101651	2.15859e+06	152756	-	-	4	3	3	18.9	14	14	26.918	0	3.6499	2922600000	7	243	26918.1	Q8BH80;Q9QY76	Q8BH80;Q9QY76	Vesicle-associated membrane protein-associated protein B	Vapb
1.07792e+06	1.58371e+06	1.11881e+06	143854	134519	101334	234589	147445	1.26015e+06	152348	-	-	4	4	4	12.4	12.4	12.4	43.165	0	45.285	3235600000	12	380	43165.6	A0A0A6YX73;Q8K1M3;P12367;A0A0A6YY28;H3BK84;P31324	A0A0A6YX73;Q8K1M3;P12367;A0A0A6YY28	cAMP-dependent protein kinase type II-alpha regulatory subunit	Prkar2a
574462	655581	516520	69625.4	26525.6	237497	288751	139119	582188	152304	-	-	7	7	7	12.6	12.6	12.6	82.829	0	78.145	3270700000	35	745	82829.7	A2AQR0;Q64521	A2AQR0;Q64521	Glycerol-3-phosphate dehydrogenase;Glycerol-3-phosphate dehydrogenase, mitochondrial	Gpd2
1.13085e+06	1.0521e+06	783725	77192.6	83953.1	270362	242586	82384.6	988891	151296	-	-	4	4	4	16	16	16	39.644	0	5.638	2359100000	7	362	39644.6	A0A0N4SV32;Q3UMP4;Q9CY58;A0A0N4SWH2;A0A0N4SUQ1;A0A0N4SUN8;A0A0N4SV40;A0A0N4SVK5	A0A0N4SV32;Q3UMP4;Q9CY58;A0A0N4SWH2;A0A0N4SUQ1;A0A0N4SUN8;A0A0N4SV40	Plasminogen activator inhibitor 1 RNA-binding protein	Serbp1
2.94075e+06	3.28968e+06	2.94751e+06	123334	28957.4	193003	93993.8	316288	3.05931e+06	151115	-	-	2	2	2	8.9	8.9	8.9	21.258	0.0050314	1.5979	3552200000	3	191	21258.6	P60766	P60766	Cell division control protein 42 homolog	Cdc42
353518	323787	280557	93361.9	87645	151790	154650	264283	319287	150346	-	-	12	12	12	13.8	13.8	13.8	108.49	0	71.822	5417000000	17	1025	108489	Q04857	Q04857	Collagen alpha-1(VI) chain	Col6a1
94230.7	NaN	68900.2	5589.14	1674.36	NaN	NaN	439245	81565.5	148836	-	-	2	2	2	15.9	15.9	15.9	14.65	0.0028531	2.3788	647330000	0	132	14649.9	P04117	P04117	Fatty acid-binding protein, adipocyte	Fabp4
4.94275e+06	3.40293e+06	5.28142e+06	261690	143584	38584.8	209472	85800.9	4.54237e+06	147826	-	-	2	2	2	18	18	18	13.561	0	323.31	3832800000	4	111	13561.5	Q9CQB4;Q9D855	Q9CQB4;Q9D855	Cytochrome b-c1 complex subunit 7	Uqcrb
3.63111e+06	3.94787e+06	2.64675e+06	2365.59	57661	368218	231481	70384.8	3.40858e+06	146022	-	-	4	4	4	17.4	17.4	17.4	37.402	0	61.743	5347400000	18	333	37402.1	Q9R062;V9GX26;K3W4S6	Q9R062;V9GX26;K3W4S6	Glycogenin-1	Gyg1;Gyg
2.06844e+06	2.35089e+06	1.40898e+06	55754	55039.7	142197	133052	343530	1.94277e+06	145915	-	-	5	5	5	22.6	22.6	22.6	34.476	0	53.686	3683100000	34	318	34475.9	A2AL12;B2RXM2;J3QNY1;Q8BG05;A2AL13	A2AL12;B2RXM2;J3QNY1;Q8BG05	Heterogeneous nuclear ribonucleoprotein A3	Hnrnpa3;Gm6793;Gm9242
490019	439390	388644	70599.7	78936.2	173361	206264	192530	439351	144338	-	-	18	4	4	23.1	4.9	4.9	112.98	0	13.427	3664300000	22	1023	112982	Q8VDN2	Q8VDN2	Sodium/potassium-transporting ATPase subunit alpha-1	Atp1a1
92334.9	124799	53298.2	68750.8	73672.4	187462	179404	212229	90144.2	144304	-	-	6	6	6	1.9	1.9	1.9	428.25	0	5.6849	2440500000	9	3784	428259	Q4U4S6	Q4U4S6	Xin actin-binding repeat-containing protein 2	Xirp2
981166	1.23459e+06	975072	67474.6	43758.5	60518	260330	288979	1.06361e+06	144212	-	-	5	5	5	27.1	27.1	27.1	24.489	0	4.0982	1884600000	7	218	24489.5	P46638;G3UZL4;G3UY29;E9Q3P9;F8WGS1;G3UZD3;P62492;E9PZB2;F6R2Z5	P46638;G3UZL4;G3UY29;E9Q3P9;F8WGS1;G3UZD3;P62492	Ras-related protein Rab-11B;Ras-related protein Rab-11A	Rab11b;Rab11a
440327	474181	391466	71915.3	56495.6	244645	163376	184151	435324	144117	-	-	4	4	4	9.1	9.1	9.1	76.947	0	53.628	2465100000	14	682	76948.1	Q8CFR5;Q9D2N4	Q8CFR5;Q9D2N4	Dystrobrevin;Dystrobrevin alpha	Dtna
469560	1.14294e+06	463292	84566.5	118005	209216	176434	119854	691929	141615	-	-	6	6	6	11.2	11.2	11.2	62.581	0	6.099	2543200000	9	543	62582.1	Q60864	Q60864	Stress-induced-phosphoprotein 1	Stip1
475308	491989	344684	80188.1	85928.1	94487	131936	306309	437327	139770	-	-	14	2	0	41.5	7.8	0	50.151	0	91.071	1888500000	35	451	50151.6	P05213	P05213	Tubulin alpha-1B chain	Tuba1b
725214	201918	638913	101399	81520.8	144650	336848	27909.5	522015	138465	-	-	8	4	4	13.8	7.9	7.9	68.692	0	25.78	2581300000	17	608	68692.5	P07724	P07724	Serum albumin	Alb
957750	1.54123e+06	686786	106233	32126.6	282915	179244	91407.6	1.06192e+06	138385	-	-	5	3	3	13.9	8.2	8.2	55.347	0	97.101	3511700000	37	489	55347.2	F8WIS9;P11798;F8WHB5	F8WIS9;P11798;F8WHB5	Calcium/calmodulin-dependent protein kinase type II subunit alpha	Camk2a
474725	750241	416958	74884.6	53386.7	78864.1	117964	356180	547308	136256	-	-	2	2	2	7.2	7.2	7.2	47.994	0.0037783	1.6042	2211500000	5	416	47994.5	P14211	P14211	Calreticulin	Calr
1.56612e+06	1.35666e+06	985486	79553.7	26751.1	107293	217128	245345	1.30276e+06	135214	-	-	3	3	3	13.4	13.4	13.4	24.357	0.0028289	2.2885	2041700000	3	216	24357	Q14AA6;P62827;Q61820	Q14AA6;P62827	GTP-binding nuclear protein Ran	1700009N14Rik;Ran
1.33484e+06	2.07906e+06	1.37695e+06	31225.5	19067.1	289143	94222.5	242203	1.59695e+06	135172	-	-	1	1	1	6.8	6.8	6.8	22.74	0	11.515	1994500000	13	205	22740.5	D3Z3U4	D3Z3U4		9630041A04Rik
923169	1.76998e+06	1.39879e+06	87101.6	143798	115419	128427	186218	1.36398e+06	132193	-	-	5	5	5	20.1	20.1	20.1	44.172	0	33.247	3344100000	40	389	44173	P62334	P62334	26S protease regulatory subunit 10B	Psmc6
994207	1.67642e+06	834932	80213.4	97230.9	104537	258812	115079	1.16852e+06	131174	-	-	3	3	3	9.5	9.5	9.5	35.076	0.001443	2.4298	2401000000	3	317	35076.7	P68040	P68040	Guanine nucleotide-binding protein subunit beta-2-like 1;Guanine nucleotide-binding protein subunit beta-2-like 1, N-terminally processed	Gnb2l1
1.08511e+06	1.1321e+06	786464	120908	14546.1	342842	114772	51767.4	1.00123e+06	128967	-	-	3	3	2	11.3	11.3	7	37.186	0.0015748	3.4385	2090900000	3	327	37186.8	P62141;A0A0J9YUG2	P62141	Serine/threonine-protein phosphatase PP1-beta catalytic subunit	Ppp1cb
6.32753e+06	2.9128e+06	2.05218e+06	86954.8	27881.4	32412.5	282016	207516	3.76417e+06	127356	-	-	3	3	3	28.9	28.9	28.9	15.061	0	71.297	3154800000	9	135	15060.7	E9Q2Q9;D3Z3Z9;Q9WUZ7;K4DI78;F6X737;F7CKA6;F6QLU8	E9Q2Q9;D3Z3Z9;Q9WUZ7;K4DI78;F6X737	SH3 domain-binding glutamic acid-rich protein	Sh3bgr
1.85003e+06	518176	1.84787e+06	267343	118023	23188.1	128299	93885	1.40536e+06	126148	-	-	4	4	4	35.3	35.3	35.3	19.077	0	87.909	2057500000	24	167	19077.6	O70548	O70548	Telethonin	Tcap
665235	313644	626440	20638.2	19659.7	60792.2	82989.3	442505	535106	125317	+	-	4	2	2	17.5	10.3	10.3	22.576	0.0015198	3.0366	1397000000	5	223	22576.1	P43276	P43276	Histone H1.5	Hist1h1b
474615	1.21032e+06	600044	42865	18113.8	383670	14016	163413	761660	124416	-	-	4	4	4	10.4	10.4	10.4	46.325	0.0015649	3.3858	2166200000	15	424	46325.4	Q9JHI5	Q9JHI5	Isovaleryl-CoA dehydrogenase, mitochondrial	Ivd
432350	465010	349238	75797.8	43220	187561	199026	109932	415533	123107	-	-	6	6	6	10.1	10.1	10.1	94.208	0	5.1768	2121400000	6	842	94208.7	Q3U2G2;Q61316	Q3U2G2;Q61316	Heat shock 70 kDa protein 4	Hspa4
1.25694e+06	1.29736e+06	1.1941e+06	24891.3	2556.83	115650	263944	206917	1.24946e+06	122792	-	-	3	3	3	17.8	17.8	17.8	19.876	0.0015723	3.4132	1784700000	6	174	19875.9	E9PZB3;E9PYL9;Q9CXW4;A2BH06	E9PZB3;E9PYL9;Q9CXW4;A2BH06	60S ribosomal protein L11	Gm5093;Gm10036;Rpl11
878894	1.97647e+06	884217	3299.63	1161.77	441203	81174.5	84043.7	1.24653e+06	122177	-	-	4	4	4	12.1	12.1	12.1	34.384	0	4.0427	2294000000	4	313	34384.8	Q9Z204	Q9Z204	Heterogeneous nuclear ribonucleoproteins C1/C2	Hnrnpc
2.24973e+06	2.22671e+06	1.79013e+06	68178.1	55693.5	138785	142658	202087	2.08886e+06	121480	-	-	2	2	2	13.1	13.1	13.1	22.604	0	23.79	2987300000	1	198	22604	Q9DCZ4	Q9DCZ4	Apolipoprotein O	Apoo
5.6688e+06	3.07504e+06	5.18755e+06	286671	69980.3	29767.8	35834.1	184997	4.6438e+06	121450	-	-	3	3	3	46.1	46.1	46.1	10.435	0	323.31	3007700000	16	89	10434.7	P99028	P99028	Cytochrome b-c1 complex subunit 6, mitochondrial	Uqcrh
1.13236e+06	1.21773e+06	584770	69506.9	28808.1	51335.2	217394	239664	978285	121342	-	-	3	3	3	16.9	16.9	16.9	34.872	0	6.562	2403300000	13	320	34872.8	P82349	P82349	Beta-sarcoglycan	Sgcb
1.68689e+06	2.52526e+06	1.25839e+06	50277.1	49474.2	220996	150858	129387	1.82351e+06	120198	-	-	3	3	3	17.6	17.6	17.6	23.407	0	6.9493	2324100000	7	204	23407.4	Q99PT1	Q99PT1	Rho GDP-dissociation inhibitor 1	Arhgdia
376804	911647	297074	62648.2	15812.5	355847	112234	53651.1	528508	120039	-	-	3	3	3	7.8	7.8	7.8	46.481	0	8.3792	1781600000	6	421	46481.2	P45952;D6RFD7	P45952	Medium-chain specific acyl-CoA dehydrogenase, mitochondrial	Acadm
730309	1.01638e+06	663786	43060.1	30997.1	245386	145323	132302	803492	119414	-	-	2	2	2	10.3	10.3	10.3	34.883	0.0014749	2.6562	1914300000	10	321	34883.7	P42669	P42669	Transcriptional activator protein Pur-alpha	Pura
3.96762e+06	3.2017e+06	3.35122e+06	2115.93	1251.77	535104	28887.3	26369.9	3.50685e+06	118746	-	-	2	2	2	40.2	40.2	40.2	10.749	0.0014684	2.5966	2347000000	9	97	10749.4	P43023	P43023	Cytochrome c oxidase subunit 6A2, mitochondrial	Cox6a2
822109	1.34068e+06	984739	82822.6	60102.4	90233	180496	176016	1.04918e+06	117934	-	-	24	2	1	54.2	6	3.5	32.637	0.002751	2.0137	2354100000	5	284	32637.5	B7ZNL3;E9Q448	B7ZNL3;E9Q448		Tpm1
935350	1.63789e+06	1.36925e+06	51397.4	34613	123658	242993	133060	1.31417e+06	117144	-	-	2	2	2	15.9	15.9	15.9	16.273	0	4.2199	1681200000	13	151	16272.7	P62264;D3YVF4;D3Z7I1	P62264;D3YVF4;D3Z7I1	40S ribosomal protein S14	Rps14
240470	259263	160755	44574.2	43166.9	74526.2	17445.3	402796	220163	116502	-	-	10	10	10	10.9	10.9	10.9	110.33	0	55.297	4245500000	13	1034	110334	Q02788;D3Z7D5	Q02788;D3Z7D5	Collagen alpha-2(VI) chain	Col6a2
676927	592848	487436	88219.7	57940.6	119563	117368	188135	585737	114245	-	-	5	5	5	12.4	12.4	12.4	63.835	0	10.191	2410800000	11	563	63835.5	A2AJP9;A8Y5Q0;A2AJQ0;Q3UV70	A2AJP9;A8Y5Q0;A2AJQ0;Q3UV70	[Pyruvate dehydrogenase [acetyl-transferring]]-phosphatase 1, mitochondrial	Pdp1
NaN	NaN	NaN	NaN	113436	NaN	NaN	NaN	NaN	113436	-	-	9	1	1	12.2	2.3	2.3	96.729	0.0025974	1.7785	219990000	1	843	96729.9	Q8CI94	Q8CI94	Glycogen phosphorylase, brain form	Pygb
487538	427042	424754	61179	36062.6	192105	67443.5	209363	446445	113231	-	-	4	4	4	6.8	6.8	6.8	73.98	0.0015601	3.3338	2355500000	6	658	73980.5	P52825;A2A8E7	P52825	Carnitine O-palmitoyltransferase 2, mitochondrial	Cpt2
4.24541e+06	3.31421e+06	2.59101e+06	121154	123040	NaN	134186	71997.4	3.38355e+06	112594	-	-	4	4	4	35.4	35.4	35.4	12.575	0	5.6266	3230200000	4	113	12575.6	Q9Z1P6	Q9Z1P6	NADH dehydrogenase [ubiquinone] 1 alpha subcomplex subunit 7	Ndufa7
525016	610810	391951	38210	21229	228151	88981.7	176128	509259	110540	-	-	6	6	6	17	17	17	56.678	0	16.408	2204200000	16	505	56678.4	P27773;F6Q404	P27773	Protein disulfide-isomerase A3	Pdia3
927829	1.3877e+06	742026	54352.7	81451.7	146793	159602	105164	1.01918e+06	109473	-	-	3	3	3	12.9	12.9	12.9	28.532	0.0015175	2.9961	1977900000	6	264	28532.4	O55234	O55234	Proteasome subunit beta type-5	Psmb5
1.62395e+06	1.20695e+06	2.07487e+06	123872	67619.4	150512	115684	83101.6	1.63526e+06	108158	-	-	4	4	4	23.4	23.4	23.4	27.285	0	47.649	2831900000	18	248	27285.3	Q9D6J6;M0QWP9	Q9D6J6	NADH dehydrogenase [ubiquinone] flavoprotein 2, mitochondrial	Ndufv2
1.67499e+06	2.29217e+06	1.19455e+06	32494.4	55549.4	203324	160048	85715.5	1.72057e+06	107426	-	-	2	2	2	16.1	16.1	16.1	21.882	0	27.447	2075800000	16	192	21882.5	F6SVV1;P62082	F6SVV1;P62082	40S ribosomal protein S7	Gm9493;Rps7
846332	851842	864182	75250.9	56179.5	208169	69271.1	126807	854118	107136	-	-	3	3	3	14.8	14.8	14.8	34.467	0	59.44	2162100000	42	311	34467.5	Q8CHS7	Q8CHS7	Dehydrogenase/reductase SDR family member 7C	Dhrs7c
1.03619e+06	1.57282e+06	1.11466e+06	64421.9	37270	145855	123293	162648	1.24122e+06	106698	-	-	1	1	1	4.5	4.5	4.5	32.28	0.0015015	2.8824	2567700000	5	292	32280.1	Q91V79	Q91V79	Fat storage-inducing transmembrane protein 1	Fitm1
1.18107e+06	NaN	NaN	91758.5	95872.7	107550	154884	78783.5	1.18107e+06	105770	-	-	1	1	1	12.3	12.3	12.3	11.877	0	9.7703	1099500000	4	106	11877.6	P56375	P56375	Acylphosphatase-2	Acyp2
837044	974570	723010	48168.2	24596.1	145027	248974	60593.3	844875	105472	-	-	5	5	5	12.2	12.2	12.2	52.866	0	20.656	2393800000	10	475	52866.6	Q8BVQ9;P46471	Q8BVQ9;P46471	26S protease regulatory subunit 7	Psmc2
NaN	NaN	26780.5	27052.5	70.587	NaN	NaN	288265	26780.5	105129	-	-	3	3	3	7.9	7.9	7.9	43.292	0.0028169	2.2749	404790000	5	378	43292.5	Q9JK53	Q9JK53	Prolargin	Prelp
1.54532e+06	1.8738e+06	1.59595e+06	15495.4	56218.9	111916	216567	122502	1.67169e+06	104540	-	-	3	3	2	22.7	22.7	17.2	22.382	0	5.5687	2085000000	6	198	22381.8	Q9CQC9	Q9CQC9	GTP-binding protein SAR1b	Sar1b
1.63446e+06	1.59702e+06	1.12282e+06	62421.1	28110.2	103677	68223.1	247779	1.45144e+06	102042	-	-	4	4	4	19.9	19.9	19.9	33.097	0	13.249	2609200000	27	297	33097.3	Q3UW66;Q99J99	Q3UW66;Q99J99	Sulfurtransferase;3-mercaptopyruvate sulfurtransferase	Mpst
880960	1.29156e+06	716312	51174	60149.8	67907.8	253834	73926.8	962943	101398	-	-	5	5	5	17.3	17.3	17.3	40.709	0	33.389	2135600000	15	370	40710	Q9CZ44;A2AT02	Q9CZ44;A2AT02	NSFL1 cofactor p47	Nsfl1c
474590	796318	270025	32326.7	46595.2	218985	156083	51009.9	513644	101000	-	-	4	4	4	8.1	8.1	8.1	58.643	0.0015699	3.4075	1637800000	8	521	58643.8	P63328;E9Q6P2;G3X8U7;E0CZ78;P48453;P48455	P63328;E9Q6P2;G3X8U7;E0CZ78;P48453;P48455	Serine/threonine-protein phosphatase 2B catalytic subunit alpha isoform;Serine/threonine-protein phosphatase;Serine/threonine-protein phosphatase 2B catalytic subunit beta isoform;Serine/threonine-protein phosphatase 2B catalytic subunit gamma isoform	Ppp3ca;Ppp3cb;Ppp3cc
809737	2.42854e+06	1.2527e+06	118305	174275	118375	8649.07	79177.1	1.49699e+06	99756.2	-	-	5	5	5	21.6	21.6	21.6	37.117	0	9.7618	3236300000	16	315	37117.7	Q6XLQ8;O35887;G3V004;G3UWV3;G3UXA8;G3UWR0;G3UXA3;G3UY49	Q6XLQ8;O35887;G3V004;G3UWV3;G3UXA8;G3UWR0	Calumenin	Calu
341367	461294	240934	53440.6	59024.1	183605	145229	56255.7	347865	99510.9	-	-	5	5	5	4.9	4.9	4.9	135.63	0	23.34	2424200000	19	1235	135633	Q6ZQ73	Q6ZQ73	Cullin-associated NEDD8-dissociated protein 2	Cand2
789882	751254	747228	52725.4	31720.6	111687	116154	171951	762788	96847.6	-	-	2	2	2	9.6	9.6	9.6	33.499	0	23.986	1902200000	5	303	33499.1	Q791V5;A2AFW6;Q9D050	Q791V5;A2AFW6;Q9D050	Mitochondrial carrier homolog 2	Mtch2
359218	425135	305479	7001.07	37009.5	203589	141631	93984.6	363277	96643	-	-	5	5	5	10	10	10	68.527	0	11.265	1781000000	12	608	68528.3	Q91YQ5	Q91YQ5	Dolichyl-diphosphooligosaccharide--protein glycosyltransferase subunit 1	Rpn1
1.75127e+06	2.43136e+06	1.72562e+06	110376	146047	80532.8	36340.9	108560	1.96941e+06	96371.3	-	-	9	2	2	52.8	11.6	11.6	22.176	0	4.0747	2260700000	10	199	22176.5	P35700;B1AXW5;B1AXW6;B1AXW4	P35700;B1AXW5;B1AXW6	Peroxiredoxin-1	Prdx1
552256	657732	421710	10644.9	8751.03	210122	187227	59948.7	543899	95338.7	-	-	2	2	2	11.4	11.4	11.4	27.372	0	4.0802	1129600000	14	246	27372.4	Q9QUM9;E0CYT2;E0CXB1	Q9QUM9;E0CYT2;E0CXB1	Proteasome subunit alpha type-6	Psma6
4.05102e+06	4.75402e+06	4.74924e+06	28106.7	22230.5	154008	74201.3	187745	4.51809e+06	93258.3	-	-	2	2	2	39.1	39.1	39.1	7.4454	0	5.6707	2508600000	12	64	7445.53	Q8R1I1	Q8R1I1	Cytochrome b-c1 complex subunit 9	Uqcr10
186565	237124	201153	62784.4	50962.4	129491	116612	103885	208281	92747	-	-	6	6	4	6.6	6.6	4.3	128.44	0	4.2378	1803900000	7	1157	128445	S4R2J6;S4R165;S4R236;G5E8K2;G5E8K3;S4R2S8;G5E8K5;G3X971;S4R1X7;S4R2C1;S4R187;S4R2F5;A0A1W2P812;S4R1S2;S4R2K9;S4R278;S4R208;S4R1U4	S4R2J6;S4R165;S4R236;G5E8K2;G5E8K3;S4R2S8;G5E8K5;G3X971;S4R1X7;S4R2C1;S4R187;S4R2F5;A0A1W2P812;S4R1S2;S4R2K9	Ankyrin-3	Ank3
601903	932105	375664	56369.2	80502.7	81800	185002	53242.6	636557	91383.3	-	-	3	3	3	8.7	8.7	8.7	53.13	0	18.968	1887300000	16	469	53130.1	E9Q242;P54822;A0A140LHU1;E9Q3T7	E9Q242;P54822	Adenylosuccinate lyase	Adsl
2.04705e+06	2.26437e+06	2.19308e+06	13319	3863.4	188609	79911.7	166640	2.16816e+06	90468.6	-	-	2	2	2	14.1	14.1	14.1	17.633	0.0028612	2.3923	2563300000	9	149	17633.1	A0A0R4J275;Q7TMF3	A0A0R4J275;Q7TMF3	NADH dehydrogenase [ubiquinone] 1 alpha subcomplex subunit 12	Ndufa12
2.69069e+06	4.70547e+06	573906	7873.49	206382	45425.5	91967.6	NaN	2.65669e+06	87912.1	-	-	2	2	2	17.1	17.1	17.1	15.032	0	27.349	1459000000	6	140	15032.2	Q9JJV2;D3YWS3	Q9JJV2;D3YWS3	Profilin-2;Profilin	Pfn2
916713	212746	701178	59071.8	81405.7	70334.1	196089	29775.6	610212	87335.2	-	-	1	1	1	2.2	2.2	2.2	40.191	0.0096852	1.4326	1625400000	13	356	40191.5	E9PUC6;G3X9Z5;Q9DCQ7	E9PUC6;G3X9Z5;Q9DCQ7	Alpha-1-antitrypsin 1-6	Serpina1f
3.38772e+06	3.83806e+06	3.56234e+06	46189.7	14595.3	212371	43511.8	115930	3.59604e+06	86519.6	-	-	3	3	3	30.1	30.1	30.1	10.309	0	8.2878	2349600000	7	93	10309.1	A0A1L1SQA8;P62852	A0A1L1SQA8;P62852	40S ribosomal protein S25	Rps25
1.17619e+06	1.8241e+06	1.50476e+06	50374.1	74913	142375	83874.9	79997.8	1.50168e+06	86307	-	-	2	2	2	23	23	23	15.524	0.0027816	2.1325	1643400000	2	135	15524.1	P63276	P63276	40S ribosomal protein S17	Rps17
1.87746e+06	2.01789e+06	2.12475e+06	12701.3	7352.88	144775	157589	100410	2.0067e+06	84565.6	-	-	2	2	2	14.4	14.4	14.4	16.958	0	7.1637	2244600000	9	153	16957.8	Q9CPU4	Q9CPU4	Microsomal glutathione S-transferase 3	Mgst3
2.45886e+06	2.226e+06	1.96251e+06	37517.8	54440.9	172307	67858.2	88089.9	2.21579e+06	84042.8	-	-	7	7	7	46.1	46.1	46.1	23.035	0	29.051	2837100000	13	206	23035.2	P35293	P35293	Ras-related protein Rab-18	Rab18
310319	459739	366107	71236.3	65642.7	128423	61279.2	89585.1	378722	83233.3	-	-	4	4	4	8	8	8	76.221	0	6.3794	1865800000	7	677	76222	Q61584;A0A0G2JEP0;A0A0H2UH27;Q6P5B5	Q61584;A0A0G2JEP0;A0A0H2UH27	Fragile X mental retardation syndrome-related protein 1	Fxr1
79552.7	72183.7	46204.2	35041.3	37687.2	146197	92001.6	103276	65980.2	82840.6	-	-	11	11	11	3.7	3.7	3.7	532.04	0	36.978	2140000000	41	4644	532045	Q9JHU4;F6ZX84	Q9JHU4	Cytoplasmic dynein 1 heavy chain 1	Dync1h1
2.01699e+06	2.72993e+06	1.80589e+06	54990.4	34969.1	128148	85491.2	98531.7	2.18427e+06	80426.1	-	-	1	1	1	18.4	18.4	18.4	11.424	0	29.031	1984600000	12	103	11424.5	Q9CPQ8	Q9CPQ8	ATP synthase subunit g, mitochondrial	Atp5l
416089	560982	436507	69175.6	13107	127221	106444	83874	471193	79964.3	-	-	6	6	6	10.5	10.5	10.5	96.904	0	10.661	2566400000	10	893	96904.7	Q62165	Q62165	Dystroglycan;Alpha-dystroglycan;Beta-dystroglycan	Dag1
331850	690668	333605	31472.9	30940.6	260510	43985.7	30916.3	452041	79565.1	-	-	3	3	3	9.1	9.1	9.1	46.063	0	3.9314	1612500000	4	429	46063.7	Q9D1F9;A0A1L1SUI3;A0A1L1SUV7	Q9D1F9;A0A1L1SUI3;A0A1L1SUV7		Slc37a4
1.28195e+06	604161	672056	5267.54	85818.4	131254	62718.4	104345	852723	77880.7	-	-	2	2	2	15.2	15.2	15.2	19.774	0	14.64	1466400000	9	171	19773.8	A0A0J9YUD8;A0A0J9YUZ4;P63158	A0A0J9YUD8;A0A0J9YUZ4;P63158	High mobility group protein B1	Hmgb1
577578	879132	393627	55162.9	31192.8	69060.2	150803	82331.9	616779	77710.2	-	-	4	4	3	12.1	12.1	7.9	50.537	0	22.218	1715900000	13	445	50537.1	Q61598	Q61598	Rab GDP dissociation inhibitor beta	Gdi2
1.1811e+06	776899	643873	45083.6	12893.4	182195	48699.1	93630.6	867292	76500.3	-	-	3	3	3	8	8	8	35.327	0.00271	1.9313	2323800000	6	325	35327.6	Q9D0M3	Q9D0M3	Cytochrome c1, heme protein, mitochondrial	Cyc1
1.33793e+06	1.42017e+06	1.13164e+06	19094.6	19156	145585	140436	53160.6	1.29658e+06	75486.4	-	-	3	3	3	13.7	13.7	13.7	27.855	0	11.527	2110900000	8	248	27854.8	Q9Z2U0;Q9CWH6	Q9Z2U0;Q9CWH6	Proteasome subunit alpha type-7;Proteasome subunit alpha type-7-like	Psma7;Psma8
859439	503279	551632	42017.3	23165.2	27222.1	70078.9	214532	638117	75403.1	-	-	1	1	1	10.2	10.2	10.2	13.582	0.0037879	1.6063	1086500000	8	128	13581.7	A0A0G2JEK2;P63254	A0A0G2JEK2;P63254	Cysteine-rich protein 1	Crip1
288371	404570	252125	11561.3	31679	99214.3	164388	69791	315022	75326.7	-	-	4	4	4	12.5	12.5	12.5	41	0.0027137	1.9498	1237800000	4	360	41000.3	Q8BZ71	Q8BZ71	SH3 and cysteine-rich domain-containing protein 3	Stac3
854817	1.08768e+06	894590	64659.6	30321.4	191408	23774.9	60874.3	945694	74207.6	-	-	3	3	3	15.1	15.1	15.1	33.901	0.0014815	2.6837	1839900000	9	324	33901.4	O35295	O35295	Transcriptional activator protein Pur-beta	Purb
238464	346207	209578	12654.4	13808.1	144075	84500.2	115726	264750	74152.7	-	-	3	3	3	5.2	5.2	5.2	86.805	0	76.173	1589400000	24	793	86805.5	G3XA10;Q8VEK3	G3XA10;Q8VEK3	Heterogeneous nuclear ribonucleoprotein U	Gm28062;Hnrnpu
565472	823414	480344	52436.2	47022.2	50386.4	177620	41559.3	623077	73804.8	-	-	5	5	5	18	18	18	49.184	0	75.146	1789100000	20	440	49184.5	P62192	P62192	26S protease regulatory subunit 4	Psmc1
1.15504e+06	1.05644e+06	985656	45902.1	68338.4	35235.1	168174	50411	1.06571e+06	73612.1	-	-	4	4	4	20	20	20	34.02	0	6.9232	1960400000	13	305	34020.1	A0A087WPH7;A2AGN7;B7ZCF1;O88685;F6Q2E3	A0A087WPH7;A2AGN7;B7ZCF1;O88685;F6Q2E3	26S protease regulatory subunit 6A	Psmc3
195846	868836	880506	91088.3	3784.68	180985	14829.7	NaN	648396	72671.9	+	-	5	2	1	56.8	38.4	23.2	13.607	0	43.217	2202900000	14	125	13606.9	F8WIX8;Q64523;Q6GSS7;Q8CGP4;Q64522	F8WIX8;Q64523;Q6GSS7;Q8CGP4;Q64522	Histone H2A;Histone H2A type 2-C;Histone H2A type 2-A;Histone H2A type 2-B	Hist1h2al;Hist2h2ac;Hist2h2aa1;Hist1h2aa;Hist2h2ab
520583	1.34244e+06	513456	36330.9	31663.5	152650	68152.1	73987.4	792161	72556.8	-	-	2	2	2	13.8	13.8	13.8	27.131	0.0015385	3.2149	1456700000	7	247	27130.8	H3BJP2;H3BLJ9;H3BJL6;H3BKH6;Q9R0P3;H3BK43	H3BJP2;H3BLJ9;H3BJL6;H3BKH6;Q9R0P3;H3BK43	S-formylglutathione hydrolase	Esd
352146	445658	235608	10714.7	NaN	33221.5	169809	75091.7	344471	72209.2	-	-	3	1	1	7.2	3.8	3.8	49.988	0	21.922	862710000	6	446	49988.1	Q3UX10	Q3UX10	Tubulin alpha chain-like 3	Tubal3
580089	1.04812e+06	903225	49084.2	15674.2	42648	160173	90696.6	843812	71655.2	-	-	3	3	3	10	10	10	29.47	0.0014472	2.4457	1527100000	5	261	29470.8	Q9R1P0;E9Q0X0;E9PW69	Q9R1P0;E9Q0X0;E9PW69	Proteasome subunit alpha type-4;Proteasome subunit alpha type	Psma4
241565	189865	184385	17760.2	1602.51	104202	80418.1	151917	205271	71180	-	-	5	5	5	4	4	4	156.61	0	10.941	1907000000	18	1392	156615	Q6PB66	Q6PB66	Leucine-rich PPR motif-containing protein, mitochondrial	Lrpprc
447637	696822	421678	17976.7	29123.6	157218	78079.8	69879.9	522046	70455.6	-	-	5	5	5	11.3	11.3	11.3	61.48	0	12.658	1757200000	29	541	61480.6	Q9EQP2;Q9QXY6	Q9EQP2	EH domain-containing protein 4	Ehd4
1.98612e+06	2.20689e+06	1.40363e+06	29020.3	61591.4	5222.76	174819	80769.5	1.86554e+06	70284.6	-	-	2	2	2	13.2	13.2	13.2	17.138	0	4.8886	1530100000	8	152	17137.8	P61089;A0A1W2P7Z3	P61089;A0A1W2P7Z3	Ubiquitin-conjugating enzyme E2 N	Ube2n
1.2974e+06	33734.8	546476	9518.41	28714.8	31186.2	162017	115439	625869	69375.1	-	-	5	4	4	54.9	48.6	48.6	15.112	0	52.5	1683300000	7	142	15112.2	Q91VB8;P01942	Q91VB8;P01942	Hemoglobin subunit alpha	haemaglobin alpha 2;Hba
1.48305e+06	1.63686e+06	1.14328e+06	67349.8	77803.7	24425.3	95806.1	80612.8	1.42106e+06	69199.5	-	-	3	3	3	22.9	22.9	22.9	21.897	0	20.744	2049400000	3	210	21897.5	P99029;G3UZJ4;H3BJQ7	P99029;G3UZJ4;H3BJQ7	Peroxiredoxin-5, mitochondrial	Prdx5
1.36267e+06	2.2598e+06	2.04209e+06	29339.1	26908.6	169843	46884.1	65833.8	1.88819e+06	67761.7	-	-	3	3	3	25.8	25.8	25.8	14.164	0	6.067	1746200000	12	120	14163.7	Q9CQ54;A0A0U1RPJ5	Q9CQ54;A0A0U1RPJ5	NADH dehydrogenase [ubiquinone] 1 subunit C2	Ndufc2
214504	325345	289471	17952.4	36573.3	58124.3	172035	50848.7	276440	67106.7	-	-	3	3	3	3.7	3.7	3.7	100.2	0	9.9737	1728700000	13	908	100203	Q8VDM4	Q8VDM4	26S proteasome non-ATPase regulatory subunit 2	Psmd2
677708	712222	518332	25434.4	25863.2	89938.7	110968	80258.1	636087	66492.5	-	-	3	3	3	10.5	10.5	10.5	46.67	0	12.754	1593700000	5	410	46670	P63005;Q5SW16	P63005	Platelet-activating factor acetylhydrolase IB subunit alpha	Pafah1b1
636331	951525	491704	10030.2	43314.5	94052.6	113274	69140.1	693187	65962.3	-	-	4	4	4	12.8	12.8	12.8	50.06	0	6.5676	1772000000	5	437	50060.8	Q9D8N0	Q9D8N0	Elongation factor 1-gamma	Eef1g
551415	461682	615838	7394.31	1519.99	20093.1	123205	177199	542978	65882.3	-	-	3	3	3	12.7	12.7	12.7	46.719	0	29.097	1526800000	8	434	46719.4	P59017	P59017	Bcl-2-like protein 13	Bcl2l13
496770	863766	579935	13281.3	25577.5	138590	39835.3	102977	646824	64052.2	-	-	4	4	4	10.9	10.9	10.9	44.889	0	10.925	1792400000	21	412	44889.6	Q07417	Q07417	Short-chain specific acyl-CoA dehydrogenase, mitochondrial	Acads
19782.6	27184.6	22369.6	8222.22	7853.19	68919.2	103585	129662	23112.3	63648.3	-	-	98	2	2	25.6	0.5	0.5	815.63	0.0015848	3.4972	1429900000	4	7496	815639	E9QQ96;Z4YJE4;A0A1W2P6H1	E9QQ96;Z4YJE4		Obscn
174719	273624	159720	20531.8	36595.4	139121	87808.6	30977.8	202688	63006.9	-	-	5	5	5	5.7	5.7	5.7	132.32	0	21.548	1456300000	12	1182	132317	A2AI91;A2AI89;A2AI88;A2AI87;P18826	A2AI91;A2AI89;A2AI88;A2AI87;P18826	Phosphorylase b kinase regulatory subunit alpha, skeletal muscle isoform	Phka1
1.40431e+06	1.354e+06	1.17225e+06	50256.2	40961.3	12608.2	168103	39681.6	1.31019e+06	62322.1	-	-	2	2	2	17.5	17.5	17.5	24.838	0	178.28	1550100000	8	223	24838.3	Q9R0P9	Q9R0P9	Ubiquitin carboxyl-terminal hydrolase isozyme L1	Uchl1
361169	360635	514863	NaN	NaN	NaN	64041.3	58427.6	412222	61234.4	-	-	1	1	1	8.5	8.5	8.5	18.916	0	5.5132	552730000	2	165	18915.7	P63325	P63325	40S ribosomal protein S10	Rps10
1.16706e+06	1.14025e+06	1.19581e+06	5890.31	27386.1	138944	53542.2	74381.9	1.16771e+06	60028.9	-	-	5	5	5	23.5	23.5	23.5	26.674	0	14.942	1894700000	15	243	26674.3	P62908;A0A140LI77;D3YV43	P62908;A0A140LI77;D3YV43	40S ribosomal protein S3	Rps3
1.17259e+06	1.73083e+06	907527	35284.9	50880.4	82828.3	116760	12666.3	1.27032e+06	59684	-	+	3	3	3	19	19	19	23.537	0	20.248	1539500000	26	210	23537	P46425;P19157;sp|P09211ups|GSTP1_HUMAN_UPS;Q8VC73;F6RWR5	P46425;P19157;sp|P09211ups|GSTP1_HUMAN_UPS	Glutathione S-transferase P 2;Glutathione S-transferase P 1	Gstp2;Gstp1
2.93268e+06	2.38234e+06	3.39151e+06	21351.6	20273	75357.4	81998.5	99220.3	2.90218e+06	59640.2	-	-	1	1	1	10.3	10.3	10.3	9.0125	0.0086313	1.5121	1912900000	8	78	9012.59	D3Z786;D3YWY6;D3Z5S0;E9Q0V4;P63030	D3Z786;D3YWY6;D3Z5S0;E9Q0V4;P63030	Mitochondrial pyruvate carrier 1	Mpc1
588441	749361	667473	13427.1	NaN	147878	16617.9	NaN	668425	59307.7	-	-	3	3	3	8.1	8.1	8.1	50.373	0	3.7648	1804100000	11	470	50373.4	P57787;B1ATM1;B1ATM2	P57787	Monocarboxylate transporter 4	Slc16a3
767414	263329	254880	12724.8	3418.38	5129.03	122485	150960	428541	58943.4	-	-	3	1	1	38.3	17	17	5.3828	0	141.88	835720000	3	47	5382.9	D3Z0J2;H3BKG0;D3Z148;P49817	D3Z0J2;H3BKG0;D3Z148;P49817	Caveolin;Caveolin-1	Cav1
487194	662471	442141	27410.2	20165.3	103359	59554	82732.2	530602	58644.1	-	-	2	2	2	7.9	7.9	7.9	29.26	0	6.3334	1185500000	11	265	29260.7	Q78IK4;B1AV14	Q78IK4;B1AV14	MICOS complex subunit Mic27	Apool
650369	712910	443050	26128.9	15446.1	61178.3	105082	84139.1	602110	58394.9	-	-	4	4	4	12.4	12.4	12.4	48.689	0	10.928	1887800000	12	445	48689.2	Q3TML0;Q922R8	Q3TML0;Q922R8	Protein disulfide-isomerase A6	Pdia6
1.28817e+06	1.34508e+06	1.24793e+06	26644.1	19778.2	127804	38510.3	77216.5	1.29373e+06	57990.6	-	-	2	2	2	16	16	16	21.557	0	217.26	1811300000	24	188	21557.7	Q8R5J9	Q8R5J9	PRA1 family protein 3	Arl6ip5
423413	563192	352831	44971	21365.1	65783.1	109742	46715.4	446478	57715.3	-	-	4	4	4	9.8	9.8	9.8	59.623	0	10.172	1500200000	15	541	59624.1	P80316;E0CZA1	P80316;E0CZA1	T-complex protein 1 subunit epsilon	Cct5
NaN	NaN	127275	21964.6	6982.66	NaN	NaN	143662	127275	57536.4	-	-	3	3	3	12.4	12.4	12.4	38.265	0	6.0377	374130000	4	338	38265	P51885;CON__Q05443	P51885	Lumican	Lum
915356	993897	654569	57571.4	47010	20018.2	43735.1	118629	854607	57392.7	-	-	3	3	3	15.8	15.8	15.8	31.025	0	7.5996	1881700000	6	279	31024.9	Q8R5L1;O35658	Q8R5L1;O35658	Complement component 1 Q subcomponent-binding protein, mitochondrial	C1qbp
788588	1.01439e+06	938257	59917	19593.7	10223.1	19515.9	169683	913743	55786.5	+	-	4	2	2	43	30.5	30.5	13.509	0	62.997	1798000000	9	128	13508.7	Q3THW5;P0C0S6;G3UWL7;Q8R029;Q3UA95	Q3THW5;P0C0S6;G3UWL7;Q8R029;Q3UA95	Histone H2A.V;Histone H2A.Z;Histone H2A	H2afv;H2afz
2.19959e+06	2.17437e+06	1.41416e+06	26817.6	48170.8	73739	52200.4	71478.3	1.92937e+06	54481.2	-	-	3	3	3	24.7	24.7	24.7	16.761	0	37.121	1727300000	10	154	16760.9	Q8BG13;O89086;S4R2M6	Q8BG13;O89086	RNA-binding protein 3	Rbm3
589856	954751	431863	24089.7	31012.6	63356.5	144142	8046.34	658823	54129.4	-	-	2	2	2	8.7	8.7	8.7	34.54	0	19.67	1215100000	13	321	34540.7	Q8CHP8	Q8CHP8	Phosphoglycolate phosphatase	Pgp
215423	294370	149566	26372.1	32388.1	27885.1	123572	57314.8	219786	53506.4	-	-	3	3	3	6.3	6.3	6.3	80.751	0	15.464	1069500000	6	710	80751.6	Q9QUR6	Q9QUR6	Prolyl endopeptidase	Prep
972448	1.2568e+06	815583	31399.6	28627.2	12072.2	60761.4	131810	1.01494e+06	52934.1	-	-	2	2	2	12.5	12.5	12.5	28.385	0	5.1388	1684500000	10	257	28385.2	Q9DAY9;Q5SQB0;Q5SQB5;Q61937	Q9DAY9;Q5SQB0;Q5SQB5;Q61937	Nucleophosmin	Npm1
997142	1.6694e+06	801338	34456.2	57927.3	43368.7	123850	5058.77	1.15596e+06	52932.2	-	-	2	2	2	20.1	20.1	20.1	17.861	0	15.882	1113500000	10	154	17861.6	P68037	P68037	Ubiquitin-conjugating enzyme E2 L3	Ube2l3
130480	134089	104105	29242.2	33522.1	61381.5	39715.7	100501	122892	52872.5	-	-	4	4	4	3.8	3.8	3.8	191.98	0	60.45	1519400000	18	1679	191986	Q5SXR6;Q68FD5;F6Z1R4	Q5SXR6;Q68FD5	Clathrin heavy chain;Clathrin heavy chain 1	Cltc
220177	232339	133754	52408	26747.3	57196.2	83196.8	43057.8	195423	52521.2	-	-	2	2	2	3.7	3.7	3.7	79.871	0.0026846	1.9086	1035000000	2	700	79872.2	O08529	O08529	Calpain-2 catalytic subunit	Capn2
210391	402931	286847	40749	40632.8	40346.1	55001.5	85651.2	300056	52476.1	-	-	3	3	3	8.4	8.4	8.4	57.477	0.0014859	2.7308	1102200000	7	535	57477.2	P80314;A0A1W2P7B7	P80314	T-complex protein 1 subunit beta	Cct2
197701	236245	134288	23245.8	15234.3	70035	57892.9	94616.5	189411	52204.9	-	-	4	4	4	7	7	7	82.874	0	11.415	1071800000	11	740	82875.2	E9QNA7;Q62417;E9Q6A3;E9PYX6;D3Z5J3	E9QNA7;Q62417;E9Q6A3;E9PYX6;D3Z5J3	Sorbin and SH3 domain-containing protein 1	Sorbs1
246419	349423	261339	NaN	NaN	88797.6	NaN	15450.3	285727	52124	-	-	1	1	1	2.6	2.6	2.6	53.267	0	10.583	883330000	4	493	53267.2	P53986	P53986	Monocarboxylate transporter 1	Slc16a1
1.31011e+06	981361	812536	32731.9	28309.4	56583.9	98618.2	42222.4	1.03467e+06	51693.2	-	-	4	4	4	20.7	20.7	20.7	26.411	0	31.61	1517900000	9	241	26411	Q9Z2U1	Q9Z2U1	Proteasome subunit alpha type-5	Psma5
2.22177e+06	2.17871e+06	1.69481e+06	20675.9	4476.06	31091.1	148453	53269.2	2.03176e+06	51593.1	-	-	3	3	3	13.5	13.5	13.5	24.008	0.0014903	2.7755	2217500000	7	207	24008.1	A0A140T8K8;P47963	A0A140T8K8;P47963	60S ribosomal protein L13	Rpl13
1.5597e+06	888064	1.13728e+06	20567.1	19706.5	70189.3	72481.6	73957.2	1.19501e+06	51380.3	-	-	8	2	2	25.8	8.1	8.1	32.931	0	4.2847	2707000000	3	298	32931.3	P51881	P51881	ADP/ATP translocase 2;ADP/ATP translocase 2, N-terminally processed	Slc25a5
400130	477940	273887	15602.9	30362.2	128079	50654	24960.6	383986	49931.7	-	-	2	2	2	6.3	6.3	6.3	38.092	0.0074166	1.5264	1043600000	3	331	38092.1	Q99L45;E0CXJ3	Q99L45;E0CXJ3	Eukaryotic translation initiation factor 2 subunit 2	Eif2s2
925351	1.36569e+06	963451	26850.9	28929.4	139794	15599.9	38282.3	1.08483e+06	49891.3	-	-	3	3	3	15.2	15.2	15.2	24.831	0.002849	2.3691	1531400000	14	217	24831.3	Q5XJF6;P53026;D6RE43	Q5XJF6;P53026	Ribosomal protein;60S ribosomal protein L10a	Rpl10a
578646	1.32172e+06	884581	20836	20865.8	62443.3	79524.8	64323.6	928316	49598.7	-	-	2	2	2	19	19	19	18.248	0.002845	2.324	1210200000	1	153	18248.5	F6WMD1;P55302	F6WMD1;P55302	Alpha-2-macroglobulin receptor-associated protein	Lrpap1
81308.9	202686	451178	20682.7	52424.3	84708.7	82607.7	6540	245058	49392.7	-	-	3	3	3	6.6	6.6	6.6	57.341	0.0015552	3.2856	1282600000	5	515	57341.3	Q8C872;Q62351	Q8C872;Q62351	Transferrin receptor protein 1	Tfrc
50300.5	NaN	36922.1	17201.1	10323.7	12382.1	197653	7926.09	43611.3	49097.2	-	-	1	1	1	1.6	1.6	1.6	81.8	0.0049813	1.5646	615300000	2	745	81800.8	Q02257	Q02257	Junction plakoglobin	Jup
274973	348667	166844	24107.2	39563	17738.6	117604	46066.4	263495	49015.8	-	-	4	4	4	6.7	6.7	6.7	81.877	0	3.7069	1284900000	7	729	81877.8	Q9CZD3	Q9CZD3	Glycine--tRNA ligase	Gars
258884	538135	267459	33211.2	14995.6	30122.6	71436.4	93940.3	354826	48741.2	-	-	3	3	3	10	10	10	48.354	0	193.69	1210700000	9	439	48354.6	P29758	P29758	Ornithine aminotransferase, mitochondrial	Oat
2.06653e+06	1.76489e+06	1.93834e+06	39609.6	22524.8	67486.4	47770.6	64668.8	1.92325e+06	48412	-	-	2	2	2	18.9	18.9	18.9	15.115	0	24.324	1782300000	6	143	15115.4	G5E814;Q9D8B4	G5E814;Q9D8B4	NADH dehydrogenase [ubiquinone] 1 alpha subcomplex subunit 11	Ndufa11
505963	552891	452979	31632.6	25730.6	133549	14997.5	34700.1	503944	48122	-	-	4	4	4	14.5	14.5	14.5	45.385	0	4.1518	1224600000	10	401	45385.4	F7B1B6;Q60936;A0A0A6YXD9	F7B1B6;Q60936	Atypical kinase ADCK3, mitochondrial	Adck3
127363	123244	115202	21333.5	22391.6	77265.4	81445.1	37885	121936	48064.1	-	-	4	4	4	3.6	3.6	3.6	184.8	0	4.8646	1336700000	6	1718	184802	E9QP49;Q99MS7;G5E8Y6	E9QP49;Q99MS7	EH domain-binding protein 1-like protein 1	Ehbp1l1
188790	282813	189934	11262.5	19196.4	83541.1	102486	19574.3	220512	47212.1	-	-	6	6	6	7.4	7.4	7.4	123.89	0	9.4583	1404700000	16	1085	123889	Q7TSH2;F7DF70	Q7TSH2	Phosphorylase b kinase regulatory subunit beta	Phkb
1.59225e+06	5.42953e+06	4.24533e+06	15786.3	149809	32593.3	31968.7	4284.48	3.7557e+06	46888.4	-	-	2	2	2	16.9	16.9	16.9	13.996	0.003866	1.7122	2865300000	7	124	13996.5	Q9DAK9	Q9DAK9	14 kDa phosphohistidine phosphatase	Phpt1
NaN	NaN	NaN	8308.94	8127.81	150366	35012.6	32337.1	NaN	46830.5	-	-	1	1	1	6.5	6.5	6.5	14.364	0.0014599	2.5081	360290000	2	123	14363.8	A0A1D5RME4;A0A1D5RLW5;A0A1D5RM85;P62717	A0A1D5RME4;A0A1D5RLW5;A0A1D5RM85;P62717	60S ribosomal protein L18a	Rpl18a
152512	227329	171872	29473.7	30138.1	103502	25638.8	45308.6	183904	46812.2	-	-	3	3	3	2.5	2.5	2.5	144.11	0	4.7149	1497300000	4	1315	144114	Q5DTJ9	Q5DTJ9	Myopalladin	Mypn
NaN	35910.1	38601.1	65204.8	25221.9	77512.4	18736.8	NaN	37255.6	46669	-	-	2	2	2	0.9	0.9	0.9	279.86	0.0026178	1.8085	791520000	7	2415	279865	P08032	P08032	Spectrin alpha chain, erythrocytic 1	Spta1
377975	430840	379237	2308.23	30433.6	55178.5	84456.3	57159.1	396017	45907.1	-	-	5	4	4	8.3	7	7	69.084	0	7.3608	1543700000	12	615	69084.9	A0A0R4J0Q5;P21619	A0A0R4J0Q5;P21619	Lamin-B2	Lmnb2
1.90203e+06	2.59153e+06	1.77258e+06	32860.8	6278.66	126382	4801.35	57232.4	2.08871e+06	45511	-	-	2	2	2	19.3	19.3	19.3	13.373	0	4.2743	1252700000	1	119	13372.7	P60867	P60867	40S ribosomal protein S20	Rps20
257300	160939	123436	27029.8	5219.93	30381.7	53653.5	108431	180558	44943.2	-	-	2	2	2	5.5	5.5	5.5	50.56	0	14.127	853350000	10	439	50560.5	Q9R0X4	Q9R0X4	Acyl-coenzyme A thioesterase 9, mitochondrial	Acot9
326084	336034	534414	NaN	NaN	43950.9	45712.3	NaN	398844	44831.6	-	-	12	1	1	63	4.3	4.3	28.157	0.0015924	3.5392	797040000	5	254	28157.4	F2Z471	F2Z471		Vdac1
2.51384e+06	3.56909e+06	444669	3331.37	28631.2	18621.7	157257	15839.4	2.17586e+06	44736.1	-	-	2	2	2	16.1	16.1	16.1	15.733	0	4.0234	1555100000	12	137	15733.5	P41105	P41105	60S ribosomal protein L28	Rpl28
2.88743e+06	NaN	1.39503e+06	44713	NaN	NaN	NaN	NaN	2.14123e+06	44713	-	-	1	1	1	5.4	5.4	5.4	29.922	0.0026076	1.8062	2113600000	0	261	29922.8	P00416	P00416	Cytochrome c oxidase subunit 3	mt-Co3
2.41741e+06	3.13947e+06	2.7141e+06	9844.86	150.145	38744.2	84039.4	90773	2.75699e+06	44710.3	-	-	2	2	2	43.1	43.1	43.1	6.3814	0	19.402	1404400000	18	58	6381.52	Q78IK2	Q78IK2	Up-regulated during skeletal muscle growth protein 5	Usmg5
295597	285679	256551	34655.8	39324.3	27054.9	90859.1	30755.8	279276	44530	-	-	4	4	4	8.9	8.9	8.9	77.206	0.001462	2.5127	1243600000	5	685	77206.7	Q8VBT1	Q8VBT1	Beta-taxilin	Txlnb
NaN	NaN	NaN	42657.3	28528.3	56609.3	31243.8	62050.6	NaN	44217.9	-	+	2	2	2	16.2	16.2	16.2	20.575	0.0026882	1.9098	532120000	3	NaN	1	sp|P02753ups|RETBP_HUMAN_UPS	sp|P02753ups|RETBP_HUMAN_UPS
359249	316663	243800	32754.6	24378.4	74087.3	30779.9	56985.3	306571	43797.1	-	-	3	3	3	5.8	5.8	5.8	68.721	0	90.333	1363700000	15	625	68722.1	Q8JZN5;A0A0G2JF25	Q8JZN5;A0A0G2JF25	Acyl-CoA dehydrogenase family member 9, mitochondrial	Acad9
453312	482078	461111	18473.8	27007.1	105111	35402.2	27488.4	465500	42696.5	-	-	4	4	4	12	12	12	41.984	0.0015949	3.5459	1357800000	8	376	41984.5	A2ASL8;Q7TQ95;A2ASM0;A2ASM2;A2ASM1	A2ASL8;Q7TQ95;A2ASM0	Protein lunapark	Lnp
547774	573123	453560	8118.59	5958.72	136931	21290.6	40599.4	524819	42579.7	-	-	3	3	3	14.2	14.2	14.2	30.337	0	11.853	1191600000	6	268	30337	A0A140T8L3;A0A140T8L1;P12970;V9GX35	A0A140T8L3;A0A140T8L1;P12970	60S ribosomal protein L7a	Rpl7a
202266	329577	517718	35706.4	24969.3	42205.9	46554.5	59725.2	349854	41832.3	-	-	2	2	2	13.4	13.4	13.4	27.273	0	40.772	897450000	17	261	27273.6	Q99N15;A2AFQ2;O08756	Q99N15;A2AFQ2;O08756	3-hydroxyacyl-CoA dehydrogenase type-2	Hsd17b10
1.91106e+06	2.13648e+06	1.93936e+06	54524.3	33846.8	38562.6	56934.7	23231.1	1.99563e+06	41419.9	-	-	3	3	3	34.1	34.1	34.1	15.081	0	122.72	2055600000	34	129	15081.3	Q9CQC7	Q9CQC7	NADH dehydrogenase [ubiquinone] 1 beta subcomplex subunit 4	Ndufb4
607165	452103	581227	44093.5	51773.9	25719.2	64120.6	19548.8	546832	41051.2	-	-	3	3	3	17.3	17.3	17.3	32.838	0	31.255	1131600000	23	295	32838.1	P14206;A0A1L1SRW0;A0A1L1SUK3	P14206	40S ribosomal protein SA	Rpsa
390915	425487	331996	11552.9	11537.2	64536.2	87307.7	29126.5	382799	40812.1	-	-	4	4	4	12.1	12.1	12.1	47.436	0	4.0757	1085500000	10	422	47436.8	Q8BG32;G3UZ28;G3UYL8;G3UX15;G3UYI4;G3UYL3;G3UWW7;G3UXL5;G3UYH2;G3UX67;G3UWV7	Q8BG32;G3UZ28;G3UYL8;G3UX15;G3UYI4;G3UYL3;G3UWW7;G3UXL5;G3UYH2	26S proteasome non-ATPase regulatory subunit 11	Psmd11
251236	371049	224444	22480.6	35288.6	53717.4	49846.3	42173.5	282243	40701.3	-	-	3	3	3	7.1	7.1	7.1	71.29	0	17.833	1245000000	5	624	71290.7	Q8R2P8;Q99MN1	Q8R2P8;Q99MN1	Lysine--tRNA ligase	Kars
372577	737377	455468	4901.48	6345.18	156589	26554.4	7629.16	521808	40403.8	-	-	3	3	3	7.2	7.2	7.2	45.536	0.0026212	1.8163	1062300000	5	389	45536.4	Q99JI4	Q99JI4	26S proteasome non-ATPase regulatory subunit 6	Psmd6
NaN	NaN	6.97538e+09	87672.9	56502.2	NaN	2414.71	11179.6	6.97538e+09	39442.4	-	+	4	3	3	5.9	4.6	4.6	76.164	0.0014577	2.4932	589110000	3	NaN	1	sp|P02788ups|TRFL_HUMAN_UPS	sp|P02788ups|TRFL_HUMAN_UPS
410770	235005	427950	31114.1	26131.4	75056.4	32450.8	31947.9	357908	39340.1	-	-	4	4	4	16.8	16.8	16.8	36.938	0	3.9448	878450000	9	346	36938.6	Q920Q6;B1AT10;B1AT13	Q920Q6;B1AT10;B1AT13	RNA-binding protein Musashi homolog 2	Msi2
110914	501379	68655.7	51194.9	32340.9	3899.53	38699.1	68550.4	226983	38937	-	-	2	2	2	5.8	5.8	5.8	53.662	0.0025806	1.7332	868830000	5	500	53662.7	P47791	P47791	Glutathione reductase, mitochondrial	Gsr
224989	815519	301293	46901.6	34559.2	NaN	35041.9	NaN	447267	38834.2	-	-	17	1	1	63.1	5.1	5.1	35.108	0	8.4116	861090000	9	312	35108.1	A0A0J9YKD4;Q04447	A0A0J9YKD4
956798	1.01878e+06	529572	19100.2	17704.8	26147.6	75450.9	50463.4	835051	37773.4	-	-	2	2	2	14.5	14.5	14.5	18.607	0	13.021	1024400000	9	172	18607	P60824;D3YU80;K4DI65	P60824;D3YU80;K4DI65	Cold-inducible RNA-binding protein	Cirbp
396633	270620	307357	9471.68	7597.75	28715.5	106192	36550.7	324870	37705.5	-	-	5	5	5	7.6	7.6	7.6	105.84	0	25.783	1618500000	10	949	105843	Q8CGK3	Q8CGK3	Lon protease homolog, mitochondrial	Lonp1
43472.7	294230	154060	17056.1	6616.06	71905.4	47108.5	45182.3	163921	37573.7	-	-	7	2	2	17.4	6	6	59.606	0	11.891	882730000	7	529	59606.9	Q923T9	Q923T9	Calcium/calmodulin-dependent protein kinase type II subunit gamma	Camk2g
865961	1.18817e+06	1.07795e+06	18247.2	17964.1	65007.1	42075.2	40866.3	1.04402e+06	36832	-	-	2	2	2	21.4	21.4	21.4	14.865	0.0085995	1.502	998540000	2	140	14865.4	P62830;A2A6F8	P62830;A2A6F8	60S ribosomal protein L23	Rpl23
659387	427667	298109	178.09	37570.2	52070.5	39094.3	54599.5	461721	36702.5	-	-	2	2	2	6.4	6.4	6.4	34.4	0.0085575	1.474	966400000	7	297	34400.6	P47962;D3YYV8	P47962;D3YYV8	60S ribosomal protein L5	Rpl5
212880	695814	699901	24211.3	26358.5	14449.2	103349	15122.1	536198	36698	-	-	2	2	2	12	12	12	20.136	0	48.998	869080000	12	184	20136.6	A0A087WS46;O70251;M0QWK5;M0QWH8;G3UX43;G3UZ47	A0A087WS46;O70251;M0QWK5;M0QWH8;G3UX43;G3UZ47	Elongation factor 1-beta	Eef1b2;Eef1b
502348	593337	375106	24816.7	20348.1	22741.8	57657.4	55696.4	490264	36252.1	-	-	5	2	2	23.2	13.4	13.4	28.086	0	3.9618	964190000	5	246	28086.4	Q9CQV8;A2A5N1	Q9CQV8;A2A5N1	14-3-3 protein beta/alpha;14-3-3 protein beta/alpha, N-terminally processed	Ywhab
11709.5	19561.9	10444.1	23019.2	21161.8	74702.4	39851	20870.6	13905.2	35921	-	-	99	2	0	21.6	0.4	0	966.36	0	25.862	960190000	9	8891	966372	A2AAJ9	A2AAJ9	Obscurin	Obscn
415167	456607	329871	9941.34	11473.7	34974.4	63546.6	49949.4	400549	33977.1	-	-	2	2	2	6.2	6.2	6.2	47.153	0.0015576	3.3088	1185000000	11	419	47153.6	Q9D8E6	Q9D8E6	60S ribosomal protein L4	Rpl4
634680	491943	1.39659e+06	18602.3	15777.1	113014	10000.4	11189.9	841072	33716.7	-	-	3	3	3	10.1	10.1	10.1	43.286	0	23.393	2221000000	13	387	43286.9	P82350;Q5SWB4	P82350	Alpha-sarcoglycan	Sgca
120635	226516	235082	25216.8	21507.2	47445.4	36316.8	38096.4	194078	33716.5	-	-	3	3	3	6.7	6.7	6.7	60.448	0.0014368	2.416	767340000	3	556	60448.6	P11983;F2Z483	P11983	T-complex protein 1 subunit alpha	Tcp1
1.10733e+06	1.13733e+06	772709	29772.1	21947.1	10874.8	68497.3	37043.3	1.00579e+06	33626.9	-	-	3	3	3	19	19	19	22.924	0.0014347	2.4141	1226300000	6	200	22923.8	A0A0R4J1C2;A0A0R4IZW8;O88456	A0A0R4J1C2;A0A0R4IZW8;O88456	Calpain small subunit 1	Capns1
2.16521e+06	2.30277e+06	1.61308e+06	5837.25	8922.93	33286.5	80958	38437.8	2.02702e+06	33488.5	-	-	3	3	3	25.7	25.7	25.7	15.245	0	14.785	1632000000	6	136	15244.9	A0A1B0GSF7;A0A1B0GQU8;P35980;A0A1B0GSS8;A0A1B0GRZ3;A0A1B0GS28;A0A1B0GSA8	A0A1B0GSF7;A0A1B0GQU8;P35980;A0A1B0GSS8	60S ribosomal protein L18	Rpl18
371283	511659	289694	19309.9	27505.4	34557	63092.6	20310.9	390879	32955.2	-	-	3	3	2	10.6	10.6	7.9	42.732	0	3.6277	1102800000	6	368	42732.7	Q3TF41;Q8BSH9;E9PW66;P28656	Q3TF41;Q8BSH9;E9PW66;P28656	Nucleosome assembly protein 1-like 1	Nap1l1
156734	217434	125399	22434.5	23075.5	18546.4	25568.2	74260.5	166522	32777	-	-	2	2	2	5.7	5.7	5.7	51.217	0	13.875	779680000	11	472	51217.8	Q8C2Q7;P70333;O35737;Q9Z2X1	Q8C2Q7;P70333;O35737;Q9Z2X1	Heterogeneous nuclear ribonucleoprotein H2;Heterogeneous nuclear ribonucleoprotein H;Heterogeneous nuclear ribonucleoprotein H, N-terminally processed;Heterogeneous nuclear ribonucleoprotein F;Heterogeneous nuclear ribonucleoprotein F, N-terminally processed	Hnrnph1;Hnrnph2;Hnrnpf
632442	797783	440165	12539.3	19002.4	91739.4	35899.6	3997.24	623464	32635.6	-	-	3	3	3	13.6	13.6	13.6	37.252	0.0015083	2.9146	1218300000	10	331	37252.2	Q9D020	Q9D020	Cytosolic 5-nucleotidase 3A	Nt5c3a
672504	1.05854e+06	443260	5147.48	37709.6	28703.6	74557.5	15584.2	724768	32340.5	-	-	5	4	4	24.6	20.5	20.5	26.635	0.0014793	2.6824	1059500000	5	224	26634.9	P48774;E9PV63;E9PVM7;E9Q5L9;E9Q024	P48774;E9PV63;E9PVM7	Glutathione S-transferase Mu 5	Gstm5
NaN	NaN	NaN	2090.28	NaN	NaN	NaN	62164.1	NaN	32127.2	-	-	3	2	2	7.9	5.7	5.7	41.639	0	16.851	132200000	1	369	41639.2	P28653	P28653	Biglycan	Bgn
432548	409035	250580	23162.5	24122.8	28247.4	33419.8	51124.7	364055	32015.4	-	-	12	3	2	35.4	12.8	9.5	49.67	0	8.0833	1167300000	17	444	49670.8	P99024	P99024	Tubulin beta-5 chain	Tubb5
497837	876610	531616	18770.1	30285.7	23050.6	65724.3	20240.6	635354	31614.3	-	-	2	2	2	15.2	15.2	15.2	24.826	0	101.93	917430000	9	224	24826.6	Q6GT24;O08709;A0A0A6YXQ7;D3Z0Y2	Q6GT24;O08709;A0A0A6YXQ7;D3Z0Y2	Peroxiredoxin-6	Prdx6
1.01919e+06	650529	568619	11693.5	9630.63	36066.9	42813.4	56729.5	746113	31386.8	-	-	4	4	4	21.3	21.3	21.3	23.713	0.0015432	3.2491	1361700000	11	216	23713.5	P24369	P24369	Peptidyl-prolyl cis-trans isomerase B	Ppib
52794.8	59858.6	32350.9	14336.3	16517.8	58663.9	22963.5	44389.4	48334.7	31374.2	-	-	3	3	3	2.7	2.7	2.7	181.79	0	3.6285	697870000	8	1705	181789	A0A087WRU0;A0A087WQ94;A0A087WQM0;A0A087WQS0;A0A1D5RM59;E9Q0S6;Q9DBT6	A0A087WRU0;A0A087WQ94;A0A087WQM0;A0A087WQS0;A0A1D5RM59;E9Q0S6		Tns1
118483	151114	88704.9	18868.1	4716.39	9378.56	70890.2	52095.6	119434	31189.8	-	-	3	3	3	3.6	3.6	3.6	126.85	0	3.673	904280000	6	1140	126853	Q3U1J4	Q3U1J4	DNA damage-binding protein 1	Ddb1
1.21443e+06	2.01369e+06	766573	5801.79	8271.92	70697	37162.4	31600.7	1.33157e+06	30706.8	-	-	5	1	1	41.6	5.1	5.1	20.503	0.0096386	1.419	1147300000	5	178	20503.2	H3BLC7	H3BLC7		Ampd1
272607	468349	307680	13523.3	19213.7	37950.6	50372.7	32469	349545	30705.9	-	-	3	3	3	10.3	10.3	10.3	47.408	0.0014556	2.4857	969970000	4	418	47408.3	P54775;A0A140LIZ5	P54775;A0A140LIZ5	26S protease regulatory subunit 6B	Psmc4
510563	517856	326912	24245.4	13369.1	25137.2	71498.4	18693.5	451777	30588.7	-	-	3	3	3	12.3	12.3	12.3	44.901	0	14.62	1031200000	12	397	44901.7	Q9JMC3;D3Z1U5	Q9JMC3	DnaJ homolog subfamily A member 4	Dnaja4
1.33369e+06	1.55164e+06	1.51481e+06	53732.1	32597.8	8645.94	29980	27193	1.46671e+06	30429.8	-	-	2	2	2	23.2	23.2	23.2	10.916	0	20.885	1163800000	6	99	10915.7	Q9CQ75	Q9CQ75	NADH dehydrogenase [ubiquinone] 1 alpha subcomplex subunit 2	Ndufa2
640905	712936	633622	8513.58	9083.52	93149.2	22063.8	16929.9	662487	29948	-	-	3	3	3	24.2	24.2	24.2	17.804	0.0014948	2.799	804030000	3	165	17804.6	P35979	P35979	60S ribosomal protein L12	Rpl12
955511	865081	702347	10970.9	7850.87	97391.9	25188.9	8023.89	840980	29885.3	-	-	2	2	2	19	19	19	16.331	0	7.8599	855110000	5	137	16330.7	Q9CR61	Q9CR61	NADH dehydrogenase [ubiquinone] 1 beta subcomplex subunit 7	Ndufb7
2.31721e+06	3.52678e+06	2.20503e+06	41515.8	NaN	4217.72	506.078	69741.6	2.68301e+06	28995.3	-	-	1	1	1	10.5	10.5	10.5	13.261	0.0027548	2.0207	1423600000	7	114	13261.5	F7AV51;Q9QZ41	F7AV51;Q9QZ41	Protein DBF4 homolog A	Dbf4
374462	437773	331735	27363	12663.2	52719	17873.2	32372.5	381324	28598.2	-	-	2	2	2	7.5	7.5	7.5	32.994	0	6.2049	953990000	5	308	32994.8	Q5M8N4	Q5M8N4	Epimerase family protein SDR39U1	Sdr39u1
2.49719e+06	3.9233e+06	1.77611e+06	28472.7	15035.6	1562.95	89261.8	5128.44	2.7322e+06	27892.3	-	-	2	2	2	29.3	29.3	29.3	8.941	0.0026631	1.8771	1107800000	1	82	8941.11	Q99JI1	Q99JI1	Musculoskeletal embryonic nuclear protein 1	Mustn1
55539.4	2608.47	1902.57	16.9967	105.036	NaN	82085.5	NaN	20016.8	27402.5	-	-	2	2	2	1.2	1.2	1.2	303.65	0.0062189	1.5488	304680000	2	2849	303658	Q3KNY0	Q3KNY0	Immunoglobulin-like and fibronectin type III domain-containing protein 1	Igfn1
313473	347980	297967	12236.7	771.763	31087	29967.3	61927.9	319807	27198.1	+	-	4	4	4	18.8	18.8	18.8	39.735	0	5.6442	922520000	15	372	39735.2	Q9QZQ8;Q8CCK0	Q9QZQ8	Core histone macro-H2A.1	H2afy
287208	494462	418088	12788.2	7723.73	13360.6	35929.1	65322.6	399919	27024.8	-	-	5	5	5	20.2	20.2	20.2	44.783	0	18.885	1405100000	6	400	44783.4	Q9DBS1	Q9DBS1	Transmembrane protein 43	Tmem43
1.30245e+06	878670	840630	23412	39739.5	NaN	41632.7	1442.51	1.00725e+06	26556.7	-	-	2	2	2	19.8	19.8	19.8	14.275	0	7.1079	719880000	3	126	14275.1	P56812;D3Z7Q5	P56812;D3Z7Q5	Programmed cell death protein 5	Pdcd5
255007	331820	576191	12008.2	12014.3	27572.4	27578.3	53559.1	387673	26546.5	-	-	2	2	2	7.9	7.9	7.9	23.897	0.0038168	1.6523	871960000	4	215	23896.9	Q91V41	Q91V41	Ras-related protein Rab-14	Rab14
492649	481296	544213	1831.96	1362.53	94361	6757.61	26193.8	506053	26101.4	-	-	3	3	3	13.6	13.6	13.6	28.024	0.0027248	1.9783	832570000	1	257	28024.7	P62918	P62918	60S ribosomal protein L8	Rpl8
104020	135334	65632	3047.19	16700.9	42920.3	44136.6	19370	101662	25235	-	-	4	4	4	4.1	4.1	4.1	160.01	0	8.0392	882820000	7	1426	160011	D3Z2Z1;F8WIA1;Q922J3;Q8C0S5;D3Z3M7;F6RCU2	D3Z2Z1;F8WIA1;Q922J3;Q8C0S5;D3Z3M7;F6RCU2	CAP-Gly domain-containing linker protein 1	Clip1
864699	1.03228e+06	877384	12196	10863.7	34627.1	36602.1	27958.2	924787	24449.4	-	-	1	1	1	7.7	7.7	7.7	15.198	0.0050188	1.5968	900010000	0	130	15197.8	A0A1B0GRR3;A0A1B0GSE8;P62281	A0A1B0GRR3;A0A1B0GSE8;P62281	40S ribosomal protein S11	Rps11
256277	NaN	NaN	29760.3	27333.8	NaN	NaN	15705.7	256277	24266.6	-	-	7	1	1	47.1	6.3	6.3	23.935	0.0026144	1.8075	286850000	2	221	23935.6	B0QZL1	B0QZL1	Enolase	Eno1
817194	973676	325869	699.446	8408.09	50503.6	4189.81	54925.4	705580	23745.3	-	-	3	3	3	10.1	10.1	10.1	38.354	0.0015625	3.3517	1315100000	14	355	38354.1	Q60668;E9Q5B6;F6SHF3;F6ZV59;G5E8G0;G3X9W0	Q60668	Heterogeneous nuclear ribonucleoprotein D0	Hnrnpd
79445.5	88705.8	59598.5	18117.5	14728.5	23397.7	21906.6	39305.7	75916.6	23491.2	-	-	3	3	3	2.4	2.4	2.4	207.12	0.0027064	1.925	931930000	5	1864	207124	Q6P5H2	Q6P5H2	Nestin	Nes
200531	340013	141386	NaN	4883.88	45210.7	28818	12283.4	227310	22799	-	-	2	2	2	6	6	6	47.688	0	7.5159	609190000	7	432	47688.2	P50247;A2ALT5	P50247;A2ALT5	Adenosylhomocysteinase	Ahcy
316241	412355	280779	9711.6	9886.23	36342.5	5294.65	49997.3	336459	22246.5	-	-	2	2	2	4.6	4.6	4.6	48.994	0.0038265	1.66	1044000000	10	434	48995	Q8BFP9	Q8BFP9	[Pyruvate dehydrogenase (acetyl-transferring)] kinase isozyme 1, mitochondrial	Pdk1
1.28291e+06	1.42049e+06	1.22191e+06	27081.1	41157.7	9015.05	10977.1	NaN	1.30844e+06	22057.7	-	-	2	2	2	19.3	19.3	19.3	14.866	0	3.716	928600000	5	135	14865.9	P16045	P16045	Galectin-1	Lgals1
84782	10309.8	48084.4	3517.76	872.423	3831.02	8382.23	93630.6	47725.4	22046.8	-	-	5	5	5	11.2	11.2	11.2	61.174	0	4.801	623120000	8	543	61174.5	Q8BH64;D3Z7U7	Q8BH64	EH domain-containing protein 2	Ehd2
169573	374475	237499	10594.5	7630.25	22356.6	18664.7	50254.9	260516	21900.2	-	-	2	2	2	9.1	9.1	9.1	28.246	0.0015898	3.5375	751970000	2	253	28246.1	O35566;A0A1B0GRG3;A0A1B0GSK8	O35566;A0A1B0GRG3;A0A1B0GSK8	CD151 antigen	Cd151
175495	45618.4	162928	16628	40202.3	35463.3	10909.2	5517.34	128014	21744	-	-	1	1	1	0.6	0.6	0.6	165.85	0	3.9572	1212500000	7	1495	165853	Q61838	Q61838	Alpha-2-macroglobulin;Alpha-2-macroglobulin 165 kDa subunit;Alpha-2-macroglobulin 35 kDa subunit	A2m
284922	402121	190763	4881.15	14656.8	20375.1	60411.8	6878.67	292602	21440.7	-	-	4	4	4	7	7	7	82.105	0	5.6128	1159100000	10	713	82106.3	O35350	O35350	Calpain-1 catalytic subunit	Capn1
389211	626153	214498	2244.11	6433.43	32545.4	62984.3	2638.97	409954	21369.2	-	-	4	4	4	13.6	13.6	13.6	55.446	0	29.603	869450000	9	491	55446.9	Q99KQ4	Q99KQ4	Nicotinamide phosphoribosyltransferase	Nampt
135418	145114	113315	16026.4	11838.7	15108.3	23364.8	39388.3	131282	21145.3	-	-	2	2	2	5.7	5.7	5.7	67.501	0	39.666	741070000	9	615	67502.3	A2ACG7;Q9DBG6	A2ACG7;Q9DBG6	Dolichyl-diphosphooligosaccharide--protein glycosyltransferase subunit 2	Rpn2
711933	845851	533672	15364.1	14887.2	4007.46	44282.6	26517.8	697152	21011.8	-	-	2	2	2	17.8	17.8	17.8	22.115	0	4.2183	902090000	1	202	22114.9	E0CXA0;P51859	E0CXA0;P51859	Hepatoma-derived growth factor	Hdgf
922547	1.26143e+06	710352	14112.5	17416.6	25282	35618.6	12352.1	964776	20956.4	-	-	1	1	1	8.1	8.1	8.1	13.82	0.0085158	1.4467	753490000	2	124	13819.8	B7ZBY6;B7ZBY7;E9PY39;Q9D2M8;Q9CZY3	B7ZBY6;B7ZBY7;E9PY39;Q9D2M8;Q9CZY3	Ubiquitin-conjugating enzyme E2 variant 2;Ubiquitin-conjugating enzyme E2 variant 1	Ube2v1;Gm20431;Ube2v2
1.71108e+06	2.59308e+06	1.35165e+06	11300	17464.8	27766.4	40479.3	5641.33	1.88527e+06	20530.4	-	-	2	2	2	20.9	20.9	20.9	10.102	0.002809	2.2362	881620000	7	86	10102.6	G5E919;F7CDT0;F6WMC0;P61082	G5E919;F7CDT0;F6WMC0;P61082	NEDD8-conjugating enzyme Ubc12	Ube2m
858450	1.26074e+06	923458	26720.3	20426	9139.97	NaN	25451.7	1.01422e+06	20434.5	-	-	1	1	1	24.8	24.8	24.8	12.441	0.0014706	2.6044	863920000	6	109	12441.2	G3UXF4	G3UXF4		Ank1
500200	237589	100467	11070.1	6817.57	17913.7	27256.6	38270.5	279419	20265.7	-	-	2	2	2	4.7	4.7	4.7	54.33	0.0038412	1.6943	928390000	4	487	54330.2	B1AV77;B1ATI0;P47740	B1AV77;B1ATI0;P47740	Aldehyde dehydrogenase;Fatty aldehyde dehydrogenase	Aldh3a2
257706	348991	198308	9274.79	17471.3	30917.5	34069.6	8938.79	268335	20134.4	-	-	2	2	2	11.7	11.7	11.7	20.909	0.0050125	1.594	714900000	5	179	20909.1	E9PY26;Q8R016;E9QA53	E9PY26;Q8R016;E9QA53	Bleomycin hydrolase	Blmh
189261	193796	303015	6222.88	437.905	27580.3	57674.5	7075.52	228691	19798.2	-	-	2	2	2	7.4	7.4	7.4	41.669	0.0015674	3.3977	645750000	9	365	41669.2	Q9ES46;Q3UF75;Q9EPC1	Q9ES46;Q3UF75;Q9EPC1	Beta-parvin;Alpha-parvin	Parvb;Parva
146039	118692	40097.1	7881.35	22864.3	18551.5	38997	4966.45	101609	18652.1	-	-	3	3	3	3.5	3.5	3.5	123.59	0.008589	1.489	793370000	4	1097	123591	Q8BKC5	Q8BKC5	Importin-5	Ipo5
789658	557855	481101	716.427	649.577	42679	30343.3	18458.3	609538	18569.3	-	-	2	2	2	8.8	8.8	8.8	26.022	0.0037831	1.6058	983290000	7	227	26022	Q8R1V4;Q5SVW9	Q8R1V4;Q5SVW9	Transmembrane emp24 domain-containing protein 4	Tmed4
428003	426481	413713	16257	12079.3	29166.5	10452.9	24746.3	422733	18540.4	-	-	2	2	2	13	13	13	28.899	0.0014728	2.6225	939070000	10	261	28899.4	O09117;D6RFU9	O09117;D6RFU9	Synaptophysin-like protein 1	Sypl1;Sypl
70374.7	76354.9	55453.1	NaN	6234.38	3350.49	45853.2	NaN	67394.2	18479.4	-	-	1	1	1	0.6	0.6	0.6	210.8	0.0028129	2.2496	903730000	8	1827	210804	E9PZM4	E9PZM4	Chromodomain-helicase-DNA-binding protein 2	Chd2
144667	214132	122065	13275.6	18422.8	15605.4	26730.4	16661.8	160288	18139.2	-	-	3	3	3	5	5	5	93.354	0.0014514	2.4741	854990000	8	835	93354.7	Q3U4W8;P56399;D3YYA5;D3Z4K7	Q3U4W8;P56399	Ubiquitin carboxyl-terminal hydrolase;Ubiquitin carboxyl-terminal hydrolase 5	Usp5
275842	278313	174879	9886.58	4686.47	21415.8	22692.6	31662	243011	18068.7	-	-	2	2	2	5.2	5.2	5.2	46.072	0.0050251	1.5969	718600000	2	406	46072.8	S4R1I6;Q8BTS0;Q61656;B1ARC0;B1ARB9;Q3U741;Q501J6	S4R1I6;Q8BTS0;Q61656;B1ARC0;B1ARB9;Q3U741;Q501J6	Probable ATP-dependent RNA helicase DDX5;Probable ATP-dependent RNA helicase DDX17	Ddx5;Ddx17
147039	201539	133710	NaN	NaN	NaN	30579.4	5236.19	160763	17907.8	-	-	1	1	1	2.3	2.3	2.3	56.141	0.0027933	2.162	450410000	3	519	56141.3	Q9CPY7	Q9CPY7	Cytosol aminopeptidase	Lap3
135112	123048	212972	17320.5	11493.8	15301.7	26848	17076.6	157044	17608.1	-	-	2	2	2	7.9	7.9	7.9	46.04	0	14.2	632480000	16	407	46040.6	Q9JK42	Q9JK42	[Pyruvate dehydrogenase (acetyl-transferring)] kinase isozyme 2, mitochondrial	Pdk2
171038	279139	245995	6496.07	5896.75	54808.1	8370.6	10702.2	232057	17254.7	-	-	1	1	1	5.1	5.1	5.1	32.64	0	4.1285	545530000	11	292	32640	Q9DAV9	Q9DAV9	Trimeric intracellular cation channel type B	Tmem38b
NaN	NaN	NaN	NaN	16892.1	NaN	NaN	NaN	NaN	16892.1	-	-	1	1	1	7	7	7	71.937	0.0027027	1.9182	72071000	1	860	71938.4	P54320	P54320	Elastin	Eln
172040	269485	176425	16677.3	14521.3	6633.7	33489.1	12528.3	205983	16769.9	-	-	1	1	1	5.9	5.9	5.9	42.613	0	65.177	628470000	18	376	42613.7	P61164	P61164	Alpha-centractin	Actr1a
432851	536930	336798	16183.2	12061.5	11439.8	39105.1	4942.04	435526	16746.3	-	-	6	6	6	20.5	20.5	20.5	53.926	0	4.3347	1127900000	8	492	53926.3	A0A1B0GSG5;Q91VI7;A0A1B0GRG4;A0A1B0GRY7	A0A1B0GSG5;Q91VI7;A0A1B0GRG4	Ribonuclease inhibitor	Rnh1
359010	216833	198747	49.4491	25747.8	25588.7	14731.4	NaN	258197	16529.3	-	-	1	1	1	5	5	5	35.534	0.0015129	2.9198	551640000	0	323	35534.9	F6VQH5;D3YTQ3;Q9Z130	F6VQH5;D3YTQ3;Q9Z130	Heterogeneous nuclear ribonucleoprotein D-like	Hnrnpdl
91363.2	101646	89248.3	13373.4	16587.6	NaN	1586.26	33833.2	94085.7	16345.1	-	-	15	1	1	22	1.2	1.2	93.961	0.0038363	1.6864	671940000	5	855	93961.8	J9JIB2	J9JIB2		Obscn
230207	315468	156628	7072.29	7649.24	20147.1	36491.2	10192.6	234101	16310.5	-	-	2	2	2	7.6	7.6	7.6	52.318	0	5.7946	661500000	3	458	52318.8	E9PYI8;Q9JMA1	E9PYI8;Q9JMA1	Ubiquitin carboxyl-terminal hydrolase;Ubiquitin carboxyl-terminal hydrolase 14	Usp14
177235	191883	109079	4617.65	8894.69	24395.3	29915	11154.6	159399	15795.4	-	-	2	2	2	2.9	2.9	2.9	105.53	0	30.2	931430000	11	911	105531	Q8R1B4	Q8R1B4	Eukaryotic translation initiation factor 3 subunit C	Eif3c
289933	234174	304709	11336.9	7704.94	19085.4	20433	20226.5	276272	15757.3	-	-	2	2	2	7.1	7.1	7.1	38.384	0.0027624	2.0446	770630000	2	353	38384.9	Q99JB2;A2AG41;A2AG39;F6WI02	Q99JB2;A2AG41;A2AG39;F6WI02	Stomatin-like protein 2, mitochondrial	Stoml2
153800	171477	129268	5536.34	3973.26	39063.8	14938	13490.2	151515	15400.3	-	-	2	2	2	3.5	3.5	3.5	67.285	0.003856	1.7053	645200000	2	607	67285.9	E9Q0W6;E9Q4K0;Q8BL65;D3YYR9;F7A5C5;F6VVW4;D3Z0Y4	E9Q0W6;E9Q4K0;Q8BL65;D3YYR9;F7A5C5;F6VVW4;D3Z0Y4	Actin-binding LIM protein 2	Ablim2
93893.7	406530	319787	9546.05	15737.4	2644	27693.6	18549.9	273404	14834.2	-	-	2	2	2	8.2	8.2	8.2	40.703	0	32.474	707280000	11	376	40703.7	O35226	O35226	26S proteasome non-ATPase regulatory subunit 4	Psmd4
127643	138442	95503.9	9364.05	6003.21	21814.7	15905.8	17530.3	120530	14123.6	-	-	2	2	2	4.5	4.5	4.5	81.135	0.0014993	2.8694	673080000	3	733	81135.9	E9PWN2;Q8BIJ6;E9PWN3	E9PWN2;Q8BIJ6;E9PWN3	Isoleucine--tRNA ligase, mitochondrial	Iars2
117158	236940	138652	11966.2	8198.84	22121.6	11009.5	12328.2	164250	13124.9	-	-	1	1	1	4.7	4.7	4.7	37.984	0	5.3442	467280000	15	361	37984.3	Q9DCH4	Q9DCH4	Eukaryotic translation initiation factor 3 subunit F	Eif3f
310296	275568	147822	8176.51	NaN	NaN	NaN	18067.3	244562	13121.9	-	-	2	2	2	7.4	7.4	7.4	52.278	0.0014663	2.5812	414160000	5	486	52278.4	Q3UJQ9;Q9D0K2	Q3UJQ9;Q9D0K2	Succinyl-CoA:3-ketoacid-coenzyme A transferase;Succinyl-CoA:3-ketoacid coenzyme A transferase 1, mitochondrial	Oxct1
167104	207759	177616	5513.57	8185.2	21263.5	14540.8	14016.6	184160	12703.9	-	-	2	2	2	7.6	7.6	7.6	39.776	0.0026702	1.8917	576600000	2	353	39776.4	Q9D880	Q9D880	Mitochondrial import inner membrane translocase subunit TIM50	Timm50
39816.3	90031	30773.1	2369.23	7194.57	27447.4	19865.6	5903.96	53540.2	12556.2	-	-	3	3	3	5.1	5.1	5.1	76.249	0.0027322	2.0006	385690000	10	673	76249.5	Q08642	Q08642	Protein-arginine deiminase type-2	Padi2
416702	401550	143886	2839.82	3756.95	NaN	39698.3	3465.66	320713	12440.2	-	-	2	2	2	5.6	5.6	5.6	44.114	0.0026316	1.8283	625800000	4	412	44114.2	Q3UZA1	Q3UZA1	CapZ-interacting protein	Rcsd1
132907	224541	160495	13630	10406	NaN	14706.8	10491.9	172647	12308.7	-	-	2	2	2	4	4	4	65.688	0.0074442	1.5325	584200000	4	571	65688.7	E9QA62	E9QA62		Lmod3
264820	344923	146553	3455.1	5779.01	NaN	14225.6	25510.8	252098	12242.6	-	-	2	2	2	7.9	7.9	7.9	30.817	0	3.7878	490050000	6	267	30817.5	Q8BL97;A2A4X6;P84104	Q8BL97;A2A4X6;P84104	Serine/arginine-rich splicing factor 7;Serine/arginine-rich splicing factor 3	Srsf7;Gm12355;Srsf3
905169	NaN	NaN	4801.8	5440.49	NaN	26445.2	NaN	905169	12229.2	-	-	1	1	1	11.8	11.8	11.8	13.438	0.0026008	1.7865	384280000	1	119	13438.5	B0R1E3;P70349	B0R1E3;P70349	Histidine triad nucleotide-binding protein 1	Hint1
157111	121482	132518	11361.6	2088.34	33513.1	2536.87	9865.31	137037	11873	-	-	17	3	3	18.1	3.6	3.6	114.86	0.0015106	2.9178	891890000	2	1044	114858	O55143	O55143	Sarcoplasmic/endoplasmic reticulum calcium ATPase 2	Atp2a2
26952.4	214614	332625	3480.82	NaN	24437.4	NaN	7289.9	191397	11736	-	-	2	2	2	13.5	13.5	13.5	20.735	0.0027435	2.0077	275320000	2	185	20735.1	A2AC13;Q3TLP8;Q05144;P63001;P60764	A2AC13;Q3TLP8;Q05144;P63001;P60764	Ras-related C3 botulinum toxin substrate 2;Ras-related C3 botulinum toxin substrate 1;Ras-related C3 botulinum toxin substrate 3	Rac3;Rac1;Rac2
156076	355886	158586	5909.6	6372.94	25423.3	13415.2	7365.38	223516	11697.3	-	-	1	1	1	5	5	5	29.637	0.0074257	1.529	440040000	3	258	29637.2	B2KF35;P47811	B2KF35;P47811	Mitogen-activated protein kinase 14	Mapk14
199927	266629	191161	6066.61	13449.4	25072.9	7184.35	5263.35	219239	11407.3	-	-	1	1	1	2.4	2.4	2.4	48.328	0.0027473	2.0137	640110000	3	418	48328.9	Q3TRH2;Q9D8W5	Q3TRH2;Q9D8W5	26S proteasome non-ATPase regulatory subunit 12	Psmd12
332549	317626	297683	3886.85	7428.15	8882.35	20923.9	15226.2	315952	11269.5	-	-	6	1	1	41.5	11	11	17.971	0	3.9817	405060000	6	164	17971.3	P17742;A0A1L1SRX5	P17742	Peptidyl-prolyl cis-trans isomerase A;Peptidyl-prolyl cis-trans isomerase A, N-terminally processed	Ppia
755328	432250	390416	565.593	2753.71	11707.3	19355.6	21818.7	525998	11240.2	-	-	2	2	2	13.7	13.7	13.7	21.066	0	17.789	553310000	10	182	21066.6	P09528	P09528	Ferritin heavy chain;Ferritin heavy chain, N-terminally processed	Fth1
419115	431395	475405	NaN	328.522	26928.8	12538.7	3540.49	441972	10834.1	-	-	2	2	2	7.6	7.6	7.6	32.342	0.003861	1.7084	935450000	2	291	32342.1	Q6ZQI3	Q6ZQI3	Malectin	Mlec
12018.7	23835.9	35049.4	1500.34	1204.08	NaN	1202.07	39188.5	23634.7	10773.7	-	-	4	4	4	11.3	11.3	11.3	38.734	0	15.532	372420000	3	346	38734.3	P10107	P10107	Annexin A1	Anxa1
NaN	NaN	NaN	NaN	NaN	NaN	NaN	10648.3	NaN	10648.3	-	-	2	2	2	5.5	5.5	5.5	48.789	0.0015456	3.2498	198000000	1	417	48790	P15089	P15089	Mast cell carboxypeptidase A	Cpa3
248053	234650	380623	1266.35	1441.31	15373.4	11186.7	23529.5	287776	10559.5	-	-	4	3	3	13.4	11	11	38.833	0	4.2518	551380000	7	373	38833.7	Q5EBP8;P49312	Q5EBP8;P49312	Heterogeneous nuclear ribonucleoprotein A1;Heterogeneous nuclear ribonucleoprotein A1, N-terminally processed	Hnrnpa1
27974.9	148810	65361.7	4139.58	9470.5	3362.25	25118.9	NaN	80715.4	10522.8	-	-	2	2	2	4.7	4.7	4.7	64.279	0.002736	2.0017	287030000	8	559	64279.3	Q8BP47	Q8BP47	Asparagine--tRNA ligase, cytoplasmic	Nars
93011.7	103394	49263.7	1295.9	824.203	5821.3	11971.2	32601.8	81889.6	10502.9	-	-	5	4	4	6.5	5	5	92.475	0	4.953	552250000	5	802	92475.8	P08113;F7C312	P08113;F7C312	Endoplasmin	Hsp90b1
36672.7	81126.2	36642.5	3348.57	13059.1	17122.8	5237.87	12577	51480.5	10269.1	-	-	3	3	3	2.1	2.1	2.1	186.53	0.002805	2.21	568130000	4	1642	186536	E9QA74;E9Q405;A0A1C7ZN10;K3W4L0;B2RRE2;E9QAX2;Q9JMH9	E9QA74;E9Q405;A0A1C7ZN10;K3W4L0;B2RRE2;E9QAX2;Q9JMH9	Unconventional myosin-XVIIIa	Myo18a
NaN	NaN	NaN	NaN	3446.71	NaN	20857.9	6326.93	NaN	10210.5	-	-	2	2	2	13.9	13.9	13.9	16.859	0	8.737	674470000	4	144	16859.6	Q9ERS2	Q9ERS2	NADH dehydrogenase [ubiquinone] 1 alpha subcomplex subunit 13	Ndufa13
521260	NaN	382568	8761.31	10686.7	NaN	11168.5	NaN	451914	10205.5	-	-	1	1	1	16.2	16.2	16.2	15.984	0	12.904	315550000	3	142	15984.3	E0CZD4;E0CYB4;Q8R5C5	E0CZD4;E0CYB4;Q8R5C5	Beta-centractin	Actr1b
149412	331443	235416	5850.36	13474.9	23845	1071.26	6480.2	238757	10144.3	-	-	3	3	3	6.6	6.6	6.6	58.004	0.0028011	2.1992	793900000	6	531	58004.3	P80317;B1AT05;Q61390	P80317	T-complex protein 1 subunit zeta	Cct6a
242289	413386	167462	9967.3	9245.29	19085.4	1411.09	NaN	274379	9927.27	-	-	2	2	2	7.6	7.6	7.6	43.185	0	27.987	594320000	3	381	43185.1	Q9DBC7;D3Z4L4;A2AI69;D3YTM5;D3Z068;D3Z0V6;P12849	Q9DBC7;D3Z4L4;A2AI69;D3YTM5;D3Z068;D3Z0V6;P12849	cAMP-dependent protein kinase type I-alpha regulatory subunit;cAMP-dependent protein kinase type I-alpha regulatory subunit, N-terminally processed;cAMP-dependent protein kinase type I-beta regulatory subunit	Prkar1a;Prkar1b
28490	12431.7	NaN	NaN	NaN	3343.73	9082.45	17248.7	20460.8	9891.63	-	-	2	1	1	0.7	0.5	0.5	269.82	0.0014409	2.4241	181580000	2	2541	269821	P26039	P26039	Talin-1	Tln1
397795	136669	366989	4761.52	5558.35	25866.1	2193.01	NaN	300485	9594.75	-	-	2	2	2	12.8	12.8	12.8	25.926	0.0037975	1.6351	438700000	0	234	25926.6	P49722	P49722	Proteasome subunit alpha type-2	Psma2
257551	341083	167699	3446.15	7904.25	14457	13408	8273.61	255444	9497.8	-	-	3	2	2	10.1	5.8	5.8	50.521	0	4.3016	637860000	7	447	50521.6	P50396;B7FAU8	P50396	Rab GDP dissociation inhibitor alpha	Gdi1
236441	479471	191639	5156.61	4740.47	11385.3	12151.3	13528.7	302517	9392.48	-	-	2	2	2	12.6	12.6	12.6	24.226	0	7.0381	490170000	6	215	24226.4	F7ANV6;D3Z0S1;A0A0N4SW89;P97429;S4R1F2;A0A0N4SV57	F7ANV6;D3Z0S1;A0A0N4SW89;P97429;S4R1F2;A0A0N4SV57	Annexin;Annexin A4	Anxa4
146493	147089	89164.4	600.007	1435.82	NaN	34170.8	426.175	127582	9158.2	-	-	2	2	2	4.7	4.7	4.7	82.897	0.001548	3.257	476210000	3	738	82897.7	Q99KK7	Q99KK7	Dipeptidyl peptidase 3	Dpp3
149009	165790	133738	1370.7	1786	3731.9	2794.94	35466.3	149512	9029.97	-	-	3	3	3	5.4	5.4	5.4	96.856	0	13.998	734200000	16	870	96857.4	E9Q3X0;Q9EQK5	E9Q3X0;Q9EQK5	Major vault protein	Mvp
91132.9	310503	70777.1	NaN	NaN	NaN	8947.13	NaN	157471	8947.13	-	-	2	2	2	6.2	6.2	6.2	47.624	0.0049875	1.5654	335410000	4	418	47624.9	Q8BP40	Q8BP40	Lysophosphatidic acid phosphatase type 6	Acp6
33961.3	23313.3	19333.5	7281.34	1023.7	1505.05	6891.71	26057.5	25536.1	8551.86	-	-	4	4	4	2.5	2.5	2.5	282.89	0.0028571	2.3816	518500000	5	2457	282895	A3KGU5;A3KGU7;E9Q447;A3KGU9;P16546	A3KGU5;A3KGU7;E9Q447;A3KGU9;P16546	Spectrin alpha chain, non-erythrocytic 1	Sptan1
NaN	25184.8	12205.3	NaN	NaN	NaN	12068	4331.45	18695	8199.73	-	-	51	1	1	24.5	0.4	0.4	223.56	0.0026281	1.8206	245790000	2	1938	223561	B1AR69;M0QWL0	B1AR69		Myh13
1.10377e+06	1.33026e+06	1.12144e+06	3083.11	2746.16	14008.8	5644.89	15029.8	1.18516e+06	8102.55	-	-	1	1	1	19	19	19	6.8838	0	7.3327	508550000	22	63	6883.85	A0A1L1SUF6;Q9CR57	A0A1L1SUF6;Q9CR57	60S ribosomal protein L14	Rpl14
185006	NaN	120438	2865.78	2820.1	9331.85	15756.7	9400.43	152722	8034.97	-	-	1	1	1	2.7	2.7	2.7	55.055	0.0026596	1.8633	418020000	3	515	55055.4	Q3TJZ6	Q3TJZ6	Protein FAM98A	Fam98a
105795	132788	127835	2691	3128.1	18838.2	4048.29	9930.34	122139	7727.19	-	-	1	1	1	3.1	3.1	3.1	44.042	0	20.942	418010000	1	391	44042.4	E9PWW2;Q921T2	E9PWW2;Q921T2	Torsin-1A-interacting protein 1	Tor1aip1
27821	NaN	NaN	NaN	NaN	NaN	NaN	7357.03	27821	7357.03	-	-	1	1	1	4.7	4.7	4.7	62.277	0.0025873	1.7414	49917000	1	572	62277.6	O08553	O08553	Dihydropyrimidinase-related protein 2	Dpysl2
127669	87756.3	61366.5	1790.73	2668.37	12164.1	17710.7	2089.94	92264.1	7284.77	-	-	1	1	1	2.6	2.6	2.6	68.839	0.0085366	1.4596	391050000	1	611	68840	Q8BGD9	Q8BGD9	Eukaryotic translation initiation factor 4B	Eif4b
NaN	NaN	NaN	2791.87	10033.4	NaN	NaN	8132.96	NaN	6986.08	-	-	1	1	1	5.5	5.5	5.5	23.756	0.0015823	3.4727	115840000	1	217	23756.2	E9Q2H8;E9PYA3;A0A0R4J052;G5E8T9;Q99KB8	E9Q2H8;E9PYA3;A0A0R4J052;G5E8T9;Q99KB8	Hydroxyacylglutathione hydrolase, mitochondrial	Hagh
119504	211539	133707	2144.24	1850.37	20672.6	NaN	2707.3	154916	6843.63	-	-	1	1	1	4.6	4.6	4.6	34.502	0.0096735	1.4324	315010000	1	305	34502.5	Q3KNP5	Q3KNP5		V1rd18
50734.5	107818	45151.6	1789.1	8926.32	5232.33	11180.4	6949.62	67901.4	6815.55	-	-	2	2	2	2.3	2.3	2.3	126.82	0.0014535	2.4779	486370000	2	1142	126821	D3YX34;E9Q586;E9Q3M3;O08788	D3YX34;E9Q586;E9Q3M3;O08788	Dynactin subunit 1	Dctn1
28367.8	44500.3	23814.9	1813.93	2332.11	13714.7	5545.56	9281.9	32227.7	6537.64	-	-	2	2	2	2.2	2.2	2.2	118.98	0.002584	1.7343	310740000	3	1069	118979	Q8K370;D3Z2B3;D3Z7X0	Q8K370;D3Z2B3;D3Z7X0	Acyl-CoA dehydrogenase family member 10	Acad10;Acad12
518219	732294	348455	6410.62	NaN	2049.15	14832.6	2537.05	532989	6457.36	-	-	1	1	1	14.6	14.6	14.6	9.8965	0.0097087	1.4336	283260000	1	89	9896.56	D3Z703;A0A0A6YW07;Q80ZJ2;Q924B0;O55023	D3Z703;A0A0A6YW07;Q80ZJ2;Q924B0;O55023	Inositol monophosphatase 1	Impa1
64824.6	120537	83945.5	4085.25	4153.31	11178.1	7521.69	4722.63	89769	6332.2	-	-	2	2	2	4.5	4.5	4.5	53.082	0.0038071	1.6422	325780000	7	489	53082.9	H3BL49;P42932;H3BLL1;H3BKG2;H3BJB6	H3BL49;P42932;H3BLL1;H3BKG2;H3BJB6	T-complex protein 1 subunit theta	Cct8
97355.3	141450	59425	12410.9	8171.29	2285.29	4997.67	3123.3	99410.1	6197.69	-	-	2	2	2	9.6	9.6	9.6	66.406	0	92.384	333070000	8	606	66406.7	O88342;A0A0J9YU05	O88342;A0A0J9YU05	WD repeat-containing protein 1	Wdr1
258837	197822	194741	3370.94	1715.27	7219.35	8369.67	10098.6	217133	6154.77	-	-	1	1	1	5.6	5.6	5.6	26.718	0.0095923	1.403	363900000	3	234	26718.1	E9Q9E0;Q8VCX5	E9Q9E0;Q8VCX5	Calcium uptake protein 1, mitochondrial	Micu1
NaN	NaN	NaN	NaN	NaN	NaN	NaN	6125.53	NaN	6125.53	-	-	16	1	1	50.4	5.6	5.6	28.734	0.002611	1.8075	25482000	1	248	28734	E9Q7Q3;D3Z6I8;D3Z2H9	E9Q7Q3;D3Z6I8;D3Z2H9		Tpm3;Tpm3-rs7
87423.1	64619.8	80546.7	2545.42	1867.21	11338	5213.27	9396.76	77529.9	6072.13	-	-	2	2	2	3.5	3.5	3.5	111.56	0.0026918	1.9126	544080000	2	997	111562	Z4YJW0;Q8C7X2	Z4YJW0;Q8C7X2	ER membrane protein complex subunit 1	Emc1
NaN	NaN	NaN	NaN	NaN	NaN	NaN	5854.52	NaN	5854.52	-	-	1	1	1	5.8	5.8	5.8	25.258	0.0014641	2.567	221810000	0	226	25258	P40240	P40240	CD9 antigen	Cd9
1.53508e+06	1.01472e+06	951136	4380.26	1631.12	7465.57	10229.5	4919.45	1.16698e+06	5725.18	-	-	1	1	1	21.4	21.4	21.4	6.3442	0.002635	1.8291	437120000	10	56	6344.24	G3UYV7;P62858	G3UYV7;P62858	40S ribosomal protein S28	Rps28
65485.7	50747.7	46283.3	1494.45	2001.74	2278.94	19752.9	2818.7	54172.3	5669.35	-	-	2	2	2	2.9	2.9	2.9	139.88	0.002656	1.8549	377320000	3	1262	139879	Q64514;A0A087WP19;A0A087WRC0	Q64514;A0A087WP19;A0A087WRC0	Tripeptidyl-peptidase 2	Tpp2
265773	189167	429396	3255.58	1307.7	5873.92	8200.52	9558.73	294778	5639.29	-	-	2	2	2	31.5	31.5	31.5	16.318	0.0015361	3.2035	356370000	3	146	16318	Q9CQX2	Q9CQX2	Cytochrome b5 type B	Cyb5b
560846	10698.4	425399	1118.16	77.5515	NaN	NaN	15663.9	332314	5619.87	-	-	5	5	5	31.2	31.2	31.2	17.109	0	8.5308	1326100000	6	157	17109	F6ZIA4;F6VME3;F7A0B0;F6RT34;F6RWW8;F6TYB7;P04370	F6ZIA4;F6VME3;F7A0B0;F6RT34;F6RWW8;F6TYB7;P04370	Myelin basic protein	Mbp
94909.6	116682	61674.1	NaN	819.397	NaN	15154.3	822.064	91088.7	5598.59	-	-	2	2	2	7.1	7.1	7.1	40.57	0.0027855	2.1358	220210000	2	351	40570.6	P05132	P05132	cAMP-dependent protein kinase catalytic subunit alpha	Prkaca
81797	110243	57863.7	3192.8	4362.87	10655.2	5950.87	3365.39	83301.1	5505.43	-	-	3	3	3	8	8	8	61.48	0	3.708	307380000	11	552	61481	Q3TQP6;P06801	Q3TQP6;P06801	Malic enzyme;NADP-dependent malic enzyme	Me1
193838	192962	54038.7	1137.67	4037.63	2137.26	7552.11	11848.4	146946	5342.61	-	-	1	1	1	8.7	8.7	8.7	22.727	0	35.422	272460000	13	208	22727	Q9DCT8	Q9DCT8	Cysteine-rich protein 2	Crip2
798869	NaN	195216	NaN	NaN	7645.03	921.085	6957.4	497042	5174.51	-	-	1	1	1	23.1	23.1	23.1	7.4133	0.002594	1.7649	208950000	2	65	7413.37	F6RP11;Q9WTP7	F6RP11;Q9WTP7	GTP:AMP phosphotransferase AK3, mitochondrial	Ak3
25157.7	47941.1	29982.3	2911.15	4062.87	6408.92	NaN	6690.37	34360.3	5018.33	-	-	4	1	1	27	7.4	7.4	14.072	0	5.697	142950000	2	122	14072.6	D3YYZ2	D3YYZ2		Gm5239
81439.5	179498	122596	2234.81	3553.64	1596.6	16070.4	923.72	127844	4875.83	-	-	1	1	1	3.9	3.9	3.9	53.352	0.0026738	1.8935	329350000	18	492	53352.6	Q8BSD5	Q8BSD5	SH2 domain-containing adapter protein E	She
125796	NaN	141922	NaN	NaN	NaN	4854.81	NaN	133859	4854.81	-	-	1	1	1	4.8	4.8	4.8	35.44	0.009627	1.414	228830000	1	335	35439.9	Q99L13	Q99L13	3-hydroxyisobutyrate dehydrogenase, mitochondrial	Hibadh
50440.5	65597.7	58203	395.173	132.844	8626.77	6323.06	6174.67	58080.4	4330.5	-	-	1	1	1	1.5	1.5	1.5	93.314	0.0027894	2.1492	356980000	0	823	93314.8	A0A0R4J0D3;Q3TDQ1	A0A0R4J0D3;Q3TDQ1	Dolichyl-diphosphooligosaccharide--protein glycosyltransferase subunit STT3B	Stt3b
62548.3	33863.6	38495.3	344.744	NaN	NaN	3409.1	9169.4	44969.1	4307.75	-	-	1	1	1	7.3	7.3	7.3	21.058	0.0086207	1.5111	199790000	0	193	21058.7	D3YTK7;Q9R069	D3YTK7;Q9R069	Basal cell adhesion molecule	Bcam
213357	272855	160534	1691.17	716.865	1333.18	8158.54	8986.54	215582	4177.26	-	-	1	1	1	9.4	9.4	9.4	21.194	0.0062112	1.5434	327740000	3	192	21194.5	G3UZZ5;G3UWW8;O08917	G3UZZ5;G3UWW8;O08917	Flotillin-1	Flot1
12033.9	3608.25	2872.58	NaN	754.455	4397.93	1718.85	9468.42	6171.59	4084.91	-	-	7	5	3	4.6	3.8	2.1	223.35	0	38.097	380850000	6	1938	223357	E9QPE7;O08638	E9QPE7;O08638	Myosin-11	Myh11
184448	123138	58367.1	2772.01	1281.88	4870.23	6951.09	4104.27	121984	3995.9	-	-	2	2	2	6.1	6.1	6.1	52.767	0.0015528	3.2758	321400000	3	475	52767.3	Q9D1A2	Q9D1A2	Cytosolic non-specific dipeptidase	Cndp2
131632	156187	125139	2416.57	1507.17	6788.05	5615.58	3584.17	137653	3982.31	-	-	1	1	1	5.9	5.9	5.9	38.167	0	4.4411	351110000	20	338	38167.5	Q9CXR1	Q9CXR1	Dehydrogenase/reductase SDR family member 7	Dhrs7
63591.1	78510.6	60697.5	329.641	555.742	8799.86	7967.72	1829.96	67599.7	3896.58	-	-	2	2	2	1.7	1.7	1.7	164.74	0.0038314	1.6739	542280000	2	1453	164745	E9PYI7;F6VG99;E9PYF4;E0CZD8;Q3UPW3;F6TFN2	E9PYI7;F6VG99;E9PYF4;E0CZD8;Q3UPW3;F6TFN2		Lmo7
189545	261444	132653	443.536	1666.08	11318.2	NaN	579.162	194547	3501.74	-	-	1	1	1	7.7	7.7	7.7	20.746	0.0038511	1.7011	217780000	2	181	20745.8	Q8BSL7;P84078;P61205	Q8BSL7;P84078;P61205	ADP-ribosylation factor 2;ADP-ribosylation factor 1;ADP-ribosylation factor 3	Arf2;Arf1;Arf3
82622.9	97263.9	33880.5	312.032	348.876	11779.5	1358.11	3397.96	71255.7	3439.3	-	-	3	3	3	6.5	6.5	6.5	79.532	0	3.7416	265660000	3	712	79532.6	E9PUD2;Q8K1M6	E9PUD2;Q8K1M6	Dynamin-1-like protein	Dnm1l
90853.8	118106	78443.7	1972.73	1357.17	4238.87	2649.41	6950.44	95801.1	3433.72	-	-	2	2	2	6.6	6.6	6.6	54.258	0.0028329	2.303	322790000	2	501	54258.2	F6ZGN3	F6ZGN3		Myo18a
795973	NaN	NaN	NaN	NaN	3318.5	NaN	NaN	795973	3318.5	-	-	1	1	1	15.7	15.7	15.7	11.141	0.0096502	1.4256	213330000	1	102	11140.7	A2APX3;P21460	A2APX3;P21460	Cystatin-C	Cst3
40867.2	1735.72	16165.9	120.577	NaN	NaN	NaN	6424.2	19589.6	3272.39	-	-	4	4	4	7.3	7.3	7.3	147.53	0	26.216	390780000	3	1391	147531	Q6NVF7;E9QQ57;O55103;A0A0U1RNK1	Q6NVF7;E9QQ57;O55103;A0A0U1RNK1	Periaxin	Prx
NaN	NaN	630206	NaN	NaN	4359.58	1926.26	NaN	630206	3142.92	-	-	2	2	2	5.5	5.5	5.5	47.421	0	3.7137	632550000	2	422	47421.7	Q544X6;P22315	Q544X6;P22315	Ferrochelatase;Ferrochelatase, mitochondrial	Fech
418979	492472	302637	518.238	1555.28	3971.85	7005.44	2536.21	404696	3117.4	-	-	1	1	1	17.7	17.7	17.7	8.8152	0.0026774	1.8953	222940000	9	79	8815.3	A0A0N4SUI8;A0A0N4SV00;P80313	A0A0N4SUI8;A0A0N4SV00;P80313	T-complex protein 1 subunit eta	Cct7
342167	387008	282081	3005.87	2975.27	NaN	NaN	NaN	337085	2990.57	-	-	1	1	1	15.5	15.5	15.5	11.48	0	7.5959	247930000	5	103	11480.3	P63024	P63024	Vesicle-associated membrane protein 3	Vamp3
650492	497396	338591	436.838	372.829	6118.72	4511.48	2617.28	495493	2811.43	-	-	1	1	1	10.7	10.7	10.7	16.142	0.0086101	1.5022	460150000	2	140	16142.1	Q921R2;P62301	Q921R2;P62301	40S ribosomal protein S13	Rps13
95500.5	204166	49864.7	1201.16	NaN	5416.94	1468.59	NaN	116510	2695.56	-	-	1	1	1	4.5	4.5	4.5	40.555	0.0085679	1.4754	278990000	1	358	40555	Q99KV1	Q99KV1	DnaJ homolog subfamily B member 11	Dnajb11
109474	63101.6	82679.3	3134.82	2989.51	NaN	2717.99	1778.74	85084.9	2655.26	-	-	1	1	1	8.5	8.5	8.5	29.133	0.0015773	3.4418	183060000	3	272	29133.4	J3QN06;J3QMM7;K3W4M4;Q9CZ42	J3QN06;J3QMM7;K3W4M4;Q9CZ42	ATP-dependent (S)-NAD(P)H-hydrate dehydratase	Carkd
152403	92797.1	98623.3	894.519	2206.34	5838.45	1682.57	2638.41	114608	2652.06	-	-	1	1	1	6	6	6	36.059	0	9.1068	267890000	0	318	36059.3	P03888	P03888	NADH-ubiquinone oxidoreductase chain 1	Mtnd1
19566.4	46445.5	17530.8	1027.13	661.663	5442.81	3391.46	NaN	27847.5	2630.77	-	-	2	2	2	2.7	2.7	2.7	106.91	0.0038462	1.7003	125270000	2	968	106909	Q8BGQ7	Q8BGQ7	Alanine--tRNA ligase, cytoplasmic	Aars
NaN	NaN	NaN	2819.6	NaN	NaN	NaN	1654.31	NaN	2236.95	-	-	9	1	1	4.1	0.9	0.9	274.63	0	13.229	72394000	2	2583	274628	B7FAV1;B7FAU9;Q8BTM8;J3JS91	B7FAV1;B7FAU9;Q8BTM8	Filamin-A	Flna
31629.6	55787.3	9690.12	NaN	NaN	NaN	2179.17	NaN	32369	2179.17	-	-	1	1	1	1.7	1.7	1.7	67.895	0.0028249	2.2882	595070000	4	606	67895.4	Q3UZB0	Q3UZB0	Armadillo repeat-containing X-linked protein 5	Armcx5
368460	217372	24603.2	898.761	6088.7	NaN	834.452	378.914	203478	2050.21	-	-	2	2	2	5.5	5.5	5.5	58.213	0.0027739	2.0967	772770000	4	527	58213.5	Q6P9R2	Q6P9R2	Serine/threonine-protein kinase OSR1	Oxsr1
236790	218491	188586	1227.44	354.842	NaN	1313.26	5246.82	214622	2035.59	-	-	2	2	2	7	7	7	51.771	0	16.617	503520000	5	454	51771.2	E9Q9D2;E9Q9C4;E9Q9C1;E9Q9Q7;E9Q9D1;E9Q030;E9Q9C7;E9Q9C0;E9Q9C2;E9QK41;Q8K4G5	E9Q9D2;E9Q9C4;E9Q9C1;E9Q9Q7;E9Q9D1;E9Q030;E9Q9C7;E9Q9C0;E9Q9C2;E9QK41;Q8K4G5	Actin-binding LIM protein 1	Ablim1
NaN	186153	103630	810.344	1155.18	NaN	3741	1284.01	144892	1747.63	-	-	1	1	1	5.1	5.1	5.1	19.564	0.0085262	1.4483	237690000	13	175	19564.4	A0A0G2JF03;P07607	A0A0G2JF03;P07607	Thymidylate synthase	Tyms
62301	41794.6	52815.7	639.491	500.667	NaN	3794.58	NaN	52303.8	1644.91	-	-	1	1	1	5.3	5.3	5.3	43.512	0.0026525	1.8548	106870000	1	416	43512.6	P54728	P54728	UV excision repair protein RAD23 homolog B	Rad23b
44648.7	109191	79240	1017.75	114.662	4530.34	NaN	385.865	77693.1	1512.15	-	-	1	1	1	9.6	9.6	9.6	24.911	0.0015038	2.8938	121330000	9	219	24910.8	Q9D1D4	Q9D1D4	Transmembrane emp24 domain-containing protein 10	Tmed10
98105.9	138922	47761.6	97.5121	125.506	4308.97	NaN	NaN	94929.8	1510.66	-	-	2	2	2	5.9	5.9	5.9	47.006	0.008547	1.4722	198030000	3	425	47006.1	Q9DCL9;D3Z6P1;D6RCU8	Q9DCL9;D3Z6P1;D6RCU8	Multifunctional protein ADE2;Phosphoribosylaminoimidazole-succinocarboxamide synthase;Phosphoribosylaminoimidazole carboxylase	Paics
8040.57	NaN	NaN	80.2596	NaN	NaN	NaN	2524.55	8040.57	1302.4	-	-	3	3	3	13.2	13.2	13.2	30.951	0	3.642	135220000	2	281	30951.7	Q3U4F0;Q91V61	Q3U4F0;Q91V61	Sideroflexin-3	Sfxn3
54834.2	12050.9	NaN	NaN	639.645	3120.52	NaN	78.4184	33442.5	1279.53	-	-	14	1	0	41.6	2.9	0	49.909	0.009697	1.4336	69163000	1	449	49909.4	P68373;P68369	P68373;P68369	Tubulin alpha-1C chain;Tubulin alpha-1A chain	Tuba1c;Tuba1a
124452	54739.6	43803.1	708.781	284.921	NaN	NaN	2774.28	74331.7	1255.99	-	-	1	1	1	18.5	18.5	18.5	13.373	0.002649	1.8548	101350000	3	119	13373.4	Q8R404	Q8R404	Protein QIL1	Qil1
48282	NaN	NaN	NaN	239.119	NaN	1378.16	1873.07	48282	1163.45	-	-	1	1	1	1.9	1.9	1.9	81.11	0	6.7044	91744000	1	702	81111.2	E9Q4T8;Q9JLV5	E9Q4T8;Q9JLV5	Cullin-3	Cul3
60395.8	65487.1	24226.1	NaN	NaN	1121.88	NaN	NaN	50036.3	1121.88	-	-	2	2	2	9.2	9.2	9.2	32.19	0.0026667	1.8803	106780000	3	294	32190.6	O08600	O08600	Endonuclease G, mitochondrial	Endog
100512	169422	752229	564.661	659.26	NaN	2627.91	602.969	340721	1113.7	-	-	2	2	2	9	9	9	45.133	0.0014451	2.4406	493520000	4	391	45133.5	Q60737;Q6NSS6;A2ANR6	Q60737;Q6NSS6;A2ANR6	Casein kinase II subunit alpha	Csnk2a1
454685	446150	223780	1180.91	1837.26	NaN	134.384	NaN	374871	1050.85	-	-	1	1	1	5.9	5.9	5.9	19.3	0	11.518	299040000	1	170	19299.9	Q63810	Q63810	Calcineurin subunit B type 1	Ppp3r1
96907.7	89741.4	52949.7	430.903	136.045	1702.18	1714.72	499.943	79866.3	896.758	-	-	1	1	1	10.7	10.7	10.7	22.194	0.002642	1.8443	105810000	2	197	22194.1	F7CIP8;Q9CQF9	F7CIP8;Q9CQF9	Prenylcysteine oxidase	Pcyox1
18800.4	11035.3	16058.9	216.004	376.3	1924.63	1168.53	708.883	15298.2	878.869	-	-	2	2	2	2.9	2.9	2.9	130.65	0.0096154	1.4047	119220000	2	1152	130649	Q8BRK9;Q3TSU5	Q8BRK9;Q3TSU5	Alpha-mannosidase 2x	Man2a2
129037	127416	118091	376.758	265.151	1293.15	1418.56	NaN	124848	838.405	-	-	3	3	3	17.4	17.4	17.4	22.576	0.0028369	2.3103	304750000	5	201	22575.8	P37804;A0A1L1STN8	P37804	Transgelin	Tagln
398091	307729	323891	NaN	NaN	599.163	1686.93	215.082	343237	833.725	-	-	1	1	1	8.8	8.8	8.8	14.502	0.0015337	3.1937	259480000	1	125	14502.1	A0A0G2JEA9;A0A0G2JFX7;A0A0N4SUH6;Q9CWZ3	A0A0G2JEA9;A0A0G2JFX7;A0A0N4SUH6;Q9CWZ3	RNA-binding protein 8A	Rbm8a
30253.3	15954.4	17561.4	386.497	284.367	NaN	793.547	1493.68	21256.4	739.523	-	-	1	1	1	3.6	3.6	3.6	66.741	0.0096038	1.4031	100460000	2	591	66742	Q925I1	Q925I1	ATPase family AAA domain-containing protein 3	Atad3
NaN	NaN	NaN	NaN	NaN	NaN	NaN	629.145	NaN	629.145	-	-	1	1	1	15.9	15.9	15.9	12.906	0.002681	1.9045	147950000	3	113	12905.7	Q924U4;Q9WVC3	Q924U4;Q9WVC3	Caveolin;Caveolin-2	Cav2
191399	NaN	NaN	NaN	443.651	NaN	NaN	NaN	191399	443.651	-	-	1	1	1	3.3	3.3	3.3	28.998	0.0049938	1.5759	99981000	6	269	28998.5	A0A140LIW6;A0A140LHY7;Q8BH76;Q9EQ28	A0A140LIW6;A0A140LHY7;Q8BH76;Q9EQ28	DNA polymerase delta subunit 3	Pold3
NaN	NaN	NaN	NaN	NaN	NaN	NaN	423.749	NaN	423.749	-	-	3	3	3	8.3	8.3	8.3	52.848	0	22.247	160790000	3	470	52848.7	A2A4I8;O70423	A2A4I8;O70423	Membrane primary amine oxidase	Aoc3
10064.5	18823.5	9589.23	41.0298	349.839	244.32	646.383	239.563	12825.8	304.227	-	-	1	1	1	3.7	3.7	3.7	67.314	0	39.083	47382000	1	599	67314.3	P61222	P61222	ATP-binding cassette sub-family E member 1	Abce1
34887.1	48985.5	76720.1	NaN	201.602	NaN	NaN	235.398	53530.9	218.5	-	-	36	1	1	59.7	4.3	4.3	69.133	0	4.9227	212020000	2	626	69134	F6RQD1	F6RQD1		Mybpc1
53823.7	NaN	NaN	26.3898	NaN	NaN	NaN	NaN	53823.7	26.3898	-	-	14	1	1	15.7	1.9	1.9	102.72	0.0096618	1.43	84386000	2	887	102720	A1BN54;Q7TPR4	A1BN54;Q7TPR4	Alpha-actinin-1	Actn1

## Sheet: S2_Identifications-1
Summary Gradient, identified peptides, proteins, and MYH-peptides using different gradients (240 min, 45 min, 10 min)
Gradient [min]	Total peptides	Total proteins	MyHC-I unique peptides	MyHC-IIa unique peptides	MyHC combined unique peptides
240	7207.46	938.792	49.7917	44.5	94.2917	Average
	1762.2	180.908	13.6382	24.1281	17.9779	Stdev
45	4010.52	603.13	20.0435	22.3478	42.3913	Average
	2074.61	271.479	6.10401	9.34186	10.4994	Stdev
10	180.261	39.6087	4.95652	4.56522	9.52174	Average
	53.1472	11.5899	3.49507	3.80876	3.29518	Stdev
SK_AS556 excluded from data set since total intensities too low

## Sheet: S2_Identifications-2
								Peptides 240 min
Intensity Sol_CTRL_205	Intensity Sol_CTRL_206	Intensity Sol_CTRL_207	Intensity Sol_CTRL_208	Intensity Sol_CTRL_209	Intensity Sol_CTRL_210	Intensity Sol_CTRL_211	Intensity Sol_CTRL_212	Intensity Sol_CTRL_213	Intensity Sol_CTRL_214	Intensity Sol_CTRL_215	Intensity Sol_CTRL_216	Intensity Sol_CTRL_217	Intensity Sol_CTRL_218	Intensity Sol_CTRL_219	Intensity Sol_CTRL_220	Intensity Sol_CTRL_221	Intensity Sol_CTRL_222	Intensity Sol_CTRL_223	Intensity Sol_CTRL_224	Intensity Sol_CTRL_225	Intensity Sol_CTRL_226	Intensity Sol_CTRL_227	Intensity Sol_CTRL_228	N: R Count	N: K Count	N: Length	N: Mass	N: PEP	N: Score	N: Intensity	N: MS/MS Count	T: Sequence	T: Proteins	T: Gene names	T: Protein names	M: Protein group IDs
4031200000	5948700000	16414000000	4092400000	14007000000	10048000000	13054000000	9066400000	6825200000	12524000000	7336100000	3936300000	11546000000	634560000	6910200000	5301400000	3301300000	3378600000	6951500000	4428300000	9247600000	1850200000	9632800000	11670000000	0	1	18	1955.04	4.3076e-214	316.37	1555900000000	1593	VAPEEHPTLLTEAPLNPK	P68033;P62737;P63268;D3YZY0;D3Z2K3;P68134	Actc1;Acta2;Actg2;Acta1	Actin, alpha cardiac muscle 1;Actin, aortic smooth muscle;Actin, gamma-enteric smooth muscle;Actin, alpha skeletal muscle	1367;1364;1310
2872700000	4437900000	10720000000	23313000	8354000000	8541500000	9480400000	5401900000	3393700000	9592400000	5003200000	3059600000	5778500000	515050000	4741000000	4586600000	59176000	3821700000	5477100000	2769000000	6125500000	1136800000	6322100000	7448900000	1	0	16	1789.88	1.7709e-147	275.16	1269000000000	955	SYELPDGQVITIGNER	Q8BFZ3;P68033;P63260;P60710;E9Q5F4;P62737;P63268;D3YZY0;P68134;E9Q1F2	Actbl2;Actc1;Actg1;Actb;Acta2;Actg2;Acta1	Beta-actin-like protein 2;Actin, alpha cardiac muscle 1;Actin, cytoplasmic 2;Actin, cytoplasmic 2, N-terminally processed;Actin, cytoplasmic 1;Actin, cytoplasmic 1, N-terminally processed;Actin, aortic smooth muscle;Actin, gamma-enteric smooth muscle;Actin, alpha skeletal muscle	1367;1364;1310;1354;1255;518;1857
3780000000	6367800000	10422000000	6019500000	10630000000	14173000000	9963000000	5349800000	3308400000	12014000000	15373000000	4970800000	7920700000	0	6708900000	7330400000	4510500000	6028500000	7392500000	4726300000	10065000000	2379700000	6945000000	10948000000	1	0	10	975.441	2.4969e-26	227.27	1129500000000	204	AGFAGDDAPR	G3UZ07;E9Q606;F6WX90;P68033;P63260;B1ATY1;G3UYG0;P60710;E9Q5F4;E9Q2D1;P62737;P63268;D3YZY0;D3Z2K3;P68134;E9Q1F2	Actg1;Actb;Actc1;Acta2;Actg2;Acta1	Actin, alpha cardiac muscle 1;Actin, cytoplasmic 2;Actin, cytoplasmic 2, N-terminally processed;Actin, cytoplasmic 1;Actin, cytoplasmic 1, N-terminally processed;Actin, aortic smooth muscle;Actin, gamma-enteric smooth muscle;Actin, alpha skeletal muscle	1367;1364;1310;1354;1255;518;673
34228000	109710000	6771900000	85029000	7426400000	3438700000	376110000	6617000000	88510000	4971300000	14455000000	8952700	5066000000	7353300	16166000000	16718000000	8628100000	3709100000	17237000000	10658000000	18419000000	4119700000	17780000000	17789000000	0	1	11	1160.61	3.7795e-12	155.97	1098600000000	746	EITALAPSTMK	P68033;P63260;B1ATY1;F8WGM8;P60710;P62737;P63268;P68134;E9Q1F2	Actc1;Actg1;Actb;Acta2;Actg2;Acta1	Actin, alpha cardiac muscle 1;Actin, cytoplasmic 2;Actin, cytoplasmic 2, N-terminally processed;Actin, cytoplasmic 1;Actin, cytoplasmic 1, N-terminally processed;Actin, aortic smooth muscle;Actin, gamma-enteric smooth muscle;Actin, alpha skeletal muscle	1367;1364;1310;1354;1255;518
1565100000	2247200000	8991300000	2776800000	7574500000	8322100000	11264000000	5537800000	3210700000	8705200000	5603100000	1890600000	4465400000	176820000	2256100000	4594300000	1429900000	1958500000	2707800000	994790000	3912700000	651070000	3141200000	5530800000	1	0	11	1514.74	3.6893e-40	223.77	1050500000000	2865	IWHHTFYNELR	G3UZ07;E9Q606;P68033;P63260;G3UYG0;P60710;E9Q5F4;P68134	Actg1;Actb;Actc1;Acta1	Actin, alpha cardiac muscle 1;Actin, cytoplasmic 2;Actin, cytoplasmic 2, N-terminally processed;Actin, cytoplasmic 1;Actin, cytoplasmic 1, N-terminally processed;Actin, alpha skeletal muscle	1367;1364;1354;1255;673
3001300000	5306900000	9098500000	175590	8390100000	7616300000	44914000	5720800000	932250	11367000000	2997200	0	44363000	0	7519000000	8472900000	4462300000	3632300000	8108300000	4819800000	11334000000	1936600000	6107600000	10150000000	0	1	11	1197.52	1.0189e-17	180.66	913950000000	249	DSYVGDEAQSK	G3UZ07;E9Q606;V9GXQ2;P68033;P63260;G3UYG0;P60710;E9Q5F4;P62737;P63268;D3YZY0;D3Z2K3;P68134	Actg1;Actb;Gm17087;Actc1;Acta2;Actg2;Acta1	Actin, alpha cardiac muscle 1;Actin, cytoplasmic 2;Actin, cytoplasmic 2, N-terminally processed;Actin, cytoplasmic 1;Actin, cytoplasmic 1, N-terminally processed;Actin, aortic smooth muscle;Actin, gamma-enteric smooth muscle;Actin, alpha skeletal muscle	1367;1364;1310;1354;1255;673
1977400000	6725900000	5257200000	430480000	3321100000	5629900000	7551500000	37216000	310750000	6317300000	85704000	1887600000	2876000000	130370000	5726200000	2644000000	1875300000	4424500000	3082700000	1411600000	5278100000	1001500000	2021600000	11434000000	0	1	11	1170.56	4.1847e-51	228.84	894090000000	1272	HQGVMVGMGQK	G3UZ07;E9Q606;Q8BFZ3;P68033;P63260;G3UYG0;P60710;E9Q5F4;E9Q2D1;P62737;P63268;D3YZY0;D3Z2K3;P68134	Actg1;Actb;Actbl2;Actc1;Acta2;Actg2;Acta1	Beta-actin-like protein 2;Actin, alpha cardiac muscle 1;Actin, cytoplasmic 2;Actin, cytoplasmic 2, N-terminally processed;Actin, cytoplasmic 1;Actin, cytoplasmic 1, N-terminally processed;Actin, aortic smooth muscle;Actin, gamma-enteric smooth muscle;Actin, alpha skeletal muscle	1367;1364;1310;1354;1255;673;1857
2759600000	4460400000	1165900000	2454300000	8106500000	1288200000	6519800000	6199500000	3751400000	7563200000	4908900000	2692800000	5474600000	486240000	3112700000	3488200000	2503000000	2596000000	1342200000	2140200000	5140400000	1047700000	5034600000	6298900000	1	0	21	2245.01	9.3051e-296	346.62	826920000000	2836	DLYANNVMSGGTTMYPGIADR	P68134	Acta1	Actin, alpha skeletal muscle	1367
1631900000	4955400000	6320200000	2630900000	4501000000	10404000000	8571800000	2677600000	2251000000	8606600000	8252400000	2366800000	7789800000	208890000	6193600000	2803200000	1363800000	2597100000	2551600000	2063800000	5450200000	715260000	1565900000	4829700000	1	1	14	1627.8	0	398.06	788490000000	840	QEYDEAGPSIVHRK	P68033;P62737;P68134	Actc1;Acta2;Acta1	Actin, alpha cardiac muscle 1;Actin, aortic smooth muscle;Actin, alpha skeletal muscle	1367;1364;1310
2690900000	3086800000	11241000000	1617600000	8878700000	9815100000	8119700000	5513500000	3430100000	10017000000	5275000000	2888100000	5205800000	260940000	4367900000	2871900000	2230700000	2030300000	4609900000	1868800000	5300000000	322430000	4379500000	4077900000	0	2	14	1520.76	2.9023e-88	258.02	770420000000	890	AITDAAMMAEELKK	A2AQP0;Q5SX39;Q91Z83;Q5SX40;Q02566;G3UW82;B1AR69;M0QWL0;P13542;P13541	Myh7b;Myh4;Myh7;Myh1;Myh6;Myh2;Myh13;Myh8;Myh3	Myosin-7B;Myosin-4;Myosin-7;Myosin-1;Myosin-6;Myosin-8;Myosin-3	1607;2210;655;1608;945;1453;944;141;97
561720000	2509600000	6340400000	406910000	4596400000	4449300000	5703700000	3048300000	1606100000	6890000000	2545200000	1144800000	2142300000	84701000	2043100000	1472600000	663870000	2690600000	1156200000	718030000	2561200000	186450000	1931200000	3068600000	1	0	30	3195.6	0	509.12	767740000000	1658	TTGIVLDSGDGVTHNVPIYEGYALPHAIMR	P68033;P62737;P63268;D3YZY0;D3Z2K3;P68134	Actc1;Acta2;Actg2;Acta1	Actin, alpha cardiac muscle 1;Actin, aortic smooth muscle;Actin, gamma-enteric smooth muscle;Actin, alpha skeletal muscle	1367;1364;1310
1736600000	76422000	5118800000	0	198380000	3568100000	3889500000	1321900000	4422000	3568000000	43575000	0	0	72732000	2952300000	0	91015000	695780000	34665000	7395900	1714500	120380000	125090000	1056200000	0	1	18	1971.97	1.1577e-284	348.19	763740000000	895	NLQQEISDLTEQIAEGGK	Q5SX39;Q5SX40;G3UW82;P13542	Myh4;Myh1;Myh2;Myh8	Myosin-4;Myosin-1;Myosin-8	1607;655;1608;945
0	103790000	67284000	66102000	67402000	0	0	108330000	98370000	73379000	74417000	99195000	307870000	154860000	91504000	120090000	102460000	361290000	71980000	180930000	159670000	170440000	81383000	564870000	0	1	14	1567.75	1.4633e-242	340.47	689880000000	371	LQDAEEHVEAVNSK	Q5SX39	Myh4	Myosin-4	1607
754940000	1596600000	5090700000	535720000	5639900000	4317600000	7203900000	3784600000	1725800000	5324500000	1648300000	477750000	1071300000	81526000	1492600000	497990000	716940000	1420600000	1605500000	454250000	1850200000	140840000	2023300000	2881900000	1	1	14	1622.83	3.7147e-58	222.55	678040000000	898	LDLAGRDLTDYLMK	G3UZ07;Q8BFZ3;P68033;P63260;P60710;E9Q5F4;P62737;P63268;D3YZY0;D3Z2K3;P68134;E9Q1F2	Actg1;Actbl2;Actc1;Actb;Acta2;Actg2;Acta1	Beta-actin-like protein 2;Actin, alpha cardiac muscle 1;Actin, cytoplasmic 2;Actin, cytoplasmic 2, N-terminally processed;Actin, cytoplasmic 1;Actin, cytoplasmic 1, N-terminally processed;Actin, aortic smooth muscle;Actin, gamma-enteric smooth muscle;Actin, alpha skeletal muscle	1367;1364;1310;1354;1255;518;673;1857
1444800000	0	5410800000	93232000	0	3802300000	4267200000	0	0	4036700000	230770000	0	552030000	122400000	2469500000	100330000	50583000	1674100000	85097000	897490000	2987400000	154870000	168570000	4006200000	1	0	11	1199.69	7.3266e-104	230.93	661840000000	304	ITLSQVGDVLR	P05977;E0CZ30;E9PWG4	Myl1	Myosin light chain 1/3, skeletal muscle isoform	875;477
1510000000	2225200000	2223000000	1316200000	5356100000	769580000	535540000	519650000	597600000	2854600000	1884000000	43020000	3299800000	96018000	1938400000	2288300000	1123900000	870020000	3330700000	486230000	620410000	328260000	3445000000	699810000	1	1	15	1777.93	4.7868e-167	312.04	656710000000	1116	DLQHRLDEAEQLALK	Q5SX39;Q5SX40;B1AR69;M0QWL0;P13542;P13541	Myh4;Myh1;Myh13;Myh8;Myh3	Myosin-4;Myosin-1;Myosin-8;Myosin-3	1607;1608;945;944;141
0	0	0	69186000	0	0	0	0	0	0	0	0	467830000	0	151020000	91804000	59950000	140140000	54748000	175430000	134210000	144440000	112780000	234230000	0	1	14	1535.77	1.9524e-58	214.72	653000000000	473	SGFIEEDELGSILK	P32848	Pvalb	Parvalbumin alpha	1079
2350100000	1135900000	10278000000	2906900000	1964900000	8268100000	12157000000	5129300000	4264200000	13643000000	4878100000	5418400000	1318400000	439850000	8309900000	4891300000	301450000	2301800000	3500300000	3517800000	8651700000	1544900000	2772200000	7824800000	1	2	15	1686.82	2.4113e-183	316.72	637490000000	836	ENALDRAEQAEADKK	F8WID5;Q8BSH3;B7ZNL3;E9Q448;P58771;Q8BP43	Tpm1	Tropomyosin alpha-1 chain	646;1921;1242;177
1846800000	7847700	3119500000	0	55921000	4850400000	6534900000	2929800000	1514200000	5920400000	99610000	1172200000	532150000	172820000	1256100000	143710000	62164000	2831100000	126950000	1407800000	2689500000	522300000	151800000	2608300000	0	1	23	2459.24	0	475.53	597210000000	1026	MQGTLEDQIISANPLLEAFGNAK	Q5SX39;Q5SX40;G3UW82;P13542	Myh4;Myh1;Myh2;Myh8	Myosin-4;Myosin-1;Myosin-8	1607;655;1608;945
1570200000	62120000	8345200000	22841000	389680000	7258800000	6564400000	3835800000	1799800000	5731700000	72384000	1017900000	898020000	94757000	2167600000	98560000	88624000	1968800000	74241000	1100100000	4548400000	165890000	185380000	5860700000	0	1	19	2181.02	0	514.83	585400000000	753	ALQEAHQQTLDDLQAEEDK	Q5SX39;Q5SX40;G3UW82;P13542;P13541	Myh4;Myh1;Myh2;Myh8;Myh3	Myosin-4;Myosin-1;Myosin-8;Myosin-3	1607;655;1608;945;944
1311600000	212550000	10806000000	226910000	276220000	7850800000	6786800000	3620100000	2329200000	7134800000	192170000	2177000000	228440000	226640000	3199100000	242330000	66691000	2706500000	199190000	1648200000	2006100000	853910000	391090000	2999400000	1	0	15	1729.89	0	399.11	544760000000	1359	TPGAMEHELVLHQLR	Q5SX39;Q5SX40;G3UW82;P13542	Myh4;Myh1;Myh2;Myh8	Myosin-4;Myosin-1;Myosin-8	1607;655;1608;945
967890000	88008000	1992700000	58992000	92129000	348750000	1899600000	1290900000	1025400000	2840700000	96537000	741660000	187770000	5650200	1582500000	67910000	39959000	1498000000	4660700	502730000	1623200000	0	12731000	31105000	0	2	18	2167.08	0	414	532920000000	1487	KIEFEQFLPMMQAISNNK	P05977;E0CZ30;A0A087WRZ7;E9PWG4	Myl1	Myosin light chain 1/3, skeletal muscle isoform	875;477
1311800000	123250000	2680800000	127130000	132530000	3019200000	3583600000	2261100000	1558400000	3451400000	0	143890000	434610000	22952000	1668600000	96537000	82003000	1908100000	75302000	961680000	2512200000	159720000	114200000	2479800000	1	1	21	2431.19	0	573.37	532020000000	884	KLETDISQIQGEMEDIVQEAR	Q5SX39;Q5SX40;G3UW82	Myh4;Myh1;Myh2	Myosin-4;Myosin-1	1607;655;1608
925870000	2111900000	4326300000	1260700000	3695000000	3940400000	5262600000	3191800000	2250500000	4224000000	3198200000	1702700000	2457200000	156690000	3006000000	2756600000	1349900000	1766800000	2036500000	1782600000	3763000000	213910000	3283400000	4912800000	1	0	17	1893.92	0	482.88	531370000000	848	HADSVAELGEQIDNLQR	Q5SX39;Q91Z83;Q5SX40;Q02566;G3UW82;P13542	Myh4;Myh7;Myh1;Myh6;Myh2;Myh8	Myosin-4;Myosin-7;Myosin-1;Myosin-6;Myosin-8	1607;2210;655;1608;945;1453
1197800000	1767200000	4019500000	1387600000	4241200000	4263200000	4281800000	2470600000	1392400000	5443500000	3766900000	1957300000	4486600000	289130000	3754800000	4070200000	2137700000	2668000000	4518900000	1919500000	4914000000	379680000	2493200000	4033200000	1	1	11	1410.66	1.8602e-58	257.58	515500000000	419	ELTYQTEEDRK	Q5SX39;Q91Z83;Q5SX40;G3UW82;P13542	Myh4;Myh7;Myh1;Myh2;Myh8	Myosin-4;Myosin-7;Myosin-1;Myosin-8	1607;2210;655;1608;945
2676100	1477000	113500000	51822000	1071100000	1290900000	1962500000	501290000	103820000	165030000	1207500	811320	183960000	701060000	614400000	257830000	190270000	518260000	126490000	10365000	0	395020000	239860000	805000000	1	1	32	3643.8	0	480.54	513400000000	1407	SMTEQEQQQLIDDHFLFDKPVSPLLLASGMAR	P07310	Ckm	Creatine kinase M-type	884
1403100	995110000	2608300000	1508900	4027700000	3286300000	4932900000	1792100000	2468900	1206700000	1774800000	781010000	6183900	297420	1522400000	3156500000	626180000	768480000	2184000000	981580000	3576100000	476780000	1362800000	2837500000	1	1	8	922.56	0.00070044	134.3	512580000000	308	IIAPPERK	Q8BFZ3;P68033;P63260;B1ATY1;P60710;P62737;P63268;P68134;E9Q1F2	Actbl2;Actc1;Actg1;Actb;Acta2;Actg2;Acta1	Beta-actin-like protein 2;Actin, alpha cardiac muscle 1;Actin, cytoplasmic 2;Actin, cytoplasmic 2, N-terminally processed;Actin, cytoplasmic 1;Actin, cytoplasmic 1, N-terminally processed;Actin, aortic smooth muscle;Actin, gamma-enteric smooth muscle;Actin, alpha skeletal muscle	1367;1364;1310;1354;1255;518;1857
1329500000	151660000	9747000000	98780000	323020000	9643800000	10743000000	6478300000	3533800000	9600100000	159040000	1479400000	1273100000	190600000	806290000	102860000	91312000	136870000	56617000	1167600000	2789900000	163310000	117810000	3736400000	0	1	14	1651.79	3.208e-91	257.23	507970000000	525	NAYEESLDQLETLK	Q5SX39;G3UW82	Myh4;Myh2	Myosin-4	1607;655
226980000	2352900	599060000	0	1954800	169300000	1417700000	292190000	419710000	664280000	1332400	183120000	91136000	594880000	405980000	166060000	126770000	395430000	108420000	284080000	375240000	240160000	164360000	681010000	0	1	14	1506.79	3.1812e-115	278.39	498880000000	1617	LSVEALNSLTGEFK	P07310	Ckm	Creatine kinase M-type	884
223610	0	4869400000	0	170210000	3757700000	3887300000	22428000	1145300000	4911900000	209070000	1306900000	410800000	135640000	3186700000	154670000	95787000	4017400000	103260000	1034100000	3742700000	233410000	140670000	4619500000	0	1	13	1401.66	6.4611e-49	228.12	487900000000	377	VLGNPSNEEMNAK	P05977;E0CZ30;E9PWG4	Myl1	Myosin light chain 1/3, skeletal muscle isoform	875;477
2958500000	231380000	5899000000	171980000	56165000	7066700000	6118400000	3116400000	2549200000	8844400000	385070000	3082700000	622070000	161490000	5428200000	63934000	197330000	4261000000	50632000	2579100000	8301000000	979590000	29425000	8177400000	1	1	16	1800.81	0	370.52	487510000000	353	QREEQAEPDGTEVADK	Q5SX39;Q5SX40;G3UW82;B1AR69;P13542;P13541	Myh4;Myh1;Myh2;Myh13;Myh8;Myh3	Myosin-4;Myosin-1;Myosin-8;Myosin-3	1607;655;1608;945;944;141
969690000	1789100000	7002300000	1290900000	3443000000	5097500000	4600700000	4782800000	1749900000	7029500000	2743400000	881340000	2902000000	105640000	2118300000	1997900000	865940000	905020000	3242600000	929100000	3183000000	434340000	1816100000	3365200000	0	2	15	1716.9	1.0484e-254	350.79	487350000000	628	NKDPLNETVVGLYQK	Q5SX39;Q91Z83;Q5SX40;Q02566;B8JJH5;G3UW82;B1AR69;P13541	Myh4;Myh7;Myh1;Myh6;Myh2;Myh13;Myh3	Myosin-4;Myosin-7;Myosin-1;Myosin-6;Myosin-3	1607;2210;655;1608;1453;944;141
1104200000	103720000	4233200000	0	182370000	4239600000	3873200000	1896000000	1482800000	4455100000	2718400	1269300000	592800000	20913000	2289500000	118440000	99223000	2151000000	53710000	1370900000	3218600000	195560000	158240000	3426400000	1	0	14	1576.78	1.5604e-101	271.73	471960000000	2644	VVESMQSTLDAEIR	Q5SX39;Q5SX40;G3UW82	Myh4;Myh1;Myh2	Myosin-4;Myosin-1	1607;655;1608
920060000	70973000	6528500000	66725000	273370000	5631200000	5854900000	3947800000	2092300000	5244100000	125860000	0	417200000	90687000	3016700000	140600000	86490000	1171500000	62995000	1649600000	4625800000	154140000	140940000	3002300000	1	1	21	2437.17	0	397.87	461950000000	864	LQHELEEAEERADIAESQVNK	P13542	Myh8	Myosin-8	945
0	0	290330000	76223000	201570000	536910000	127760000	189590000	200840000	288730000	0	109850000	711800000	219050000	146820000	151790000	91710000	130680000	71335000	135660000	121120000	107660000	92373000	180730000	0	2	13	1435.72	1.3889e-93	272.92	461290000000	507	SMTDVLSAEDIKK	P32848	Pvalb	Parvalbumin alpha	1079
331660000	1158100000	9971700000	1272400000	3593600000	5357900000	8849400000	3886800000	2724500000	3160800000	2789200000	711480000	3049800000	251330000	1538000000	1212300000	1632600000	2514800000	2041800000	2343300000	2159200000	1085900000	2153000000	2149200000	2	0	11	1197.7	6.1798e-25	199.33	436130000000	638	AVFPSIVGRPR	G3UZ07;E9Q606;F6WX90;P68033;P63260;B1ATY1;G3UYG0;P60710;E9Q5F4;E9Q2D1;P62737;P63268;D3YZY0;D3Z2K3;P68134;E9Q1F2	Actg1;Actb;Actc1;Acta2;Actg2;Acta1	Actin, alpha cardiac muscle 1;Actin, cytoplasmic 2;Actin, cytoplasmic 2, N-terminally processed;Actin, cytoplasmic 1;Actin, cytoplasmic 1, N-terminally processed;Actin, aortic smooth muscle;Actin, gamma-enteric smooth muscle;Actin, alpha skeletal muscle	1367;1364;1310;1354;1255;518;673
17002000	2819700000	73991000	901140000	2336800000	60184000	271190000	172880000	56460000	72674000	3731100000	24426000	3820400000	29305000	44654000	2810500000	1601500000	182730000	3041600000	191940000	36645000	64495000	3628000000	1024900000	1	0	17	1837.92	0	397.84	433330000000	527	DLEEATLQHEATAAALR	Q5SX39;Q91Z83;Q02566;P13542	Myh4;Myh7;Myh6;Myh8	Myosin-4;Myosin-7;Myosin-6;Myosin-8	1607;2210;945;1453
1876700000	3030800000	1976100000	1745500000	4532400000	5874900000	2087000000	3339700000	2274200000	2259500000	3216500000	823980000	3663800000	120650000	1039700000	1439700000	1430400000	1427200000	2709000000	850970000	1797400000	252260000	2380400000	1989700000	1	1	16	1923.91	3.2356e-198	322.02	429470000000	516	YETDAIQRTEELEEAK	Q5SX39;Q91Z83;Q5SX40;Q02566;G3UW82;B1AR69;P13542;P13541	Myh4;Myh7;Myh1;Myh6;Myh2;Myh13;Myh8;Myh3	Myosin-4;Myosin-7;Myosin-1;Myosin-6;Myosin-8;Myosin-3	1607;2210;655;1608;945;1453;944;141
505320000	708630000	1874400000	334010000	945290000	1961700000	1673000000	964400000	475620000	1744000000	1081600000	9565300	1145600000	0	773300000	1533900000	1883800000	969540000	600120000	343170000	1101600000	0	672070000	1423000000	1	0	12	1232.58	4.7791e-33	198.97	418080000000	246	EGNGTVMGAELR	P05977;A0A087WRZ7;E9PWG4;P09542	Myl1;Myl3	Myosin light chain 1/3, skeletal muscle isoform;Myosin light chain 3	909;875;477
1126700000	178170000	2459800000	170270000	144780000	4183800000	5415300000	1272700000	2202900000	5953700000	360050000	1625600000	500730000	180280000	2731900000	150270000	66388000	1748200000	186290000	1203000000	2035300000	344850000	247990000	1872800000	0	1	20	2355.14	0	375.55	417840000000	1413	IEDMAMMTHLHEPAVLYNLK	Q5SX39;Q5SX40;G3UW82;B1AR69	Myh4;Myh1;Myh2;Myh13	Myosin-4;Myosin-1	1607;655;1608;141
1777900000	162830000	1405200000	6685200	2409500	5354600000	5338500000	423320000	218930000	5993100000	9587800	2169200000	447850000	127160000	2963600000	137900000	10213000	1540600000	102630000	896140000	561390000	316920000	114910000	457600000	1	1	18	1940.93	8.9855e-285	348.92	413060000000	1213	SSDAEMAVFGEAAPYLRK	Q5SX39;Q5SX40;Q1WNQ6;G3UW82	Myh4;Myh1;Myh2	Myosin-4;Myosin-1	1607;655;1608
0	159180000	2201400000	0	227950000	2577700000	1984400000	1491300000	1004200000	2651900000	601300	817670000	842590000	65166000	2598600000	71306000	51505000	2208500000	0	633310000	3030100000	130550000	97638000	3578900000	0	1	9	966.55	1.1031e-39	213.53	412890000000	380	HVLATLGEK	P05977;A0A087WRZ7;E9PWG4;A2A6Q8;Q9CZ19;P09541	Myl1;Myl4	Myosin light chain 1/3, skeletal muscle isoform;Myosin light chain 4	875;477;44
257700000	16419000	2707200000	0	40384000	1667200000	1632900000	1143900000	1367600	2786400000	0	634430000	136100000	6321100	1061100000	35340000	28412000	799060000	35507000	284730000	1633500000	18799000	31097000	2307200000	0	3	20	1818.05	3.8585e-61	194.19	398800000000	467	KPAAAPAPAPAPAPAPAKPK	P05977;E0CZ30	Myl1	Myosin light chain 1/3, skeletal muscle isoform	875
1101700000	136610000	3188100	0	135230000	54166000	41473000	15796000	1495100000	57280000	228480000	2420900000	474450000	46325000	4082800000	252500000	137050000	2606600000	127820000	2474700000	4899900000	1119700000	103470000	5345200000	0	1	8	986.519	4.2984e-05	153.73	398240000000	280	LYEQHLGK	Q5SX39;Q5SX40;G3UW82	Myh4;Myh1;Myh2	Myosin-4;Myosin-1	1607;655;1608
0	0	0	0	0	0	0	0	0	2658100	0	0	0	0	4275100000	3831200000	2258700000	691820000	3879200000	1705700000	4232800000	722040000	2520800000	5405300000	0	1	8	908.46	3.1464e-06	164.71	390860000000	106	VGNEYVTK	A2AQP0;Q5SX39;Q91Z83;Q5SX40;Q02566;B8JJH5;G3UW82;B1AR69;P13542;P13541	Myh7b;Myh4;Myh7;Myh1;Myh6;Myh2;Myh13;Myh8;Myh3	Myosin-7B;Myosin-4;Myosin-7;Myosin-1;Myosin-6;Myosin-8;Myosin-3	1607;2210;655;1608;945;1453;944;141;97
4264700	9968400	86413000	56618000	89040000	273290000	46684000	129900000	125580000	103680000	67070000	63580000	296630000	72152000	73251000	44317000	19627000	75184000	39157000	113400000	82046000	71599000	64202000	350930000	0	1	20	2185	0	424.74	386000000000	613	SELQASLEEAEASLEHEEGK	Q5SX39	Myh4	Myosin-4	1607
995310000	91361000	2353400000	91329000	93365000	306410000	80397000	107790000	244120000	3159500000	119910000	73955000	224940000	115310000	2901900000	126240000	93138000	3629200000	81135000	201940000	529420000	166270000	114700000	700750000	1	1	16	1814.88	3.7018e-169	316.37	382890000000	376	RQAEEAEEQSNVNLAK	Q5SX39;Q5SX40	Myh4;Myh1	Myosin-4;Myosin-1	1607;1608
1164900000	1545600000	3738800000	750960000	2769000000	3529600000	3513700000	2855600000	1818300000	4287200000	1944300000	1081400000	2324400000	93497000	1558200000	1833600000	505840000	1676800000	1775400000	1064400000	2667900000	341480000	1829200000	2142900000	0	1	13	1464.77	2.8477e-48	220.31	374300000000	567	LASADIETYLLEK	Q5SX39;Q91Z83;Q5SX40;Q02566;B8JJH5;G3UW82;B1AR69;P13542;P13541	Myh4;Myh7;Myh1;Myh6;Myh2;Myh13;Myh8;Myh3	Myosin-4;Myosin-7;Myosin-1;Myosin-6;Myosin-8;Myosin-3	1607;2210;655;1608;945;1453;944;141
0	1668500000	0	3976100	5410800000	0	0	0	0	72194000	1702400000	32180000	3672000000	0	113750000	1722500000	394360000	110140000	1652400000	419900000	57062000	86975000	1304500000	355830000	1	0	11	1150.62	1.2194e-50	248.6	373350000000	372	NALAHALQSAR	Q5SX39;Q91Z83	Myh4;Myh7	Myosin-4;Myosin-7	1607;2210
1732200000	121890000	4134800000	130400000	255660000	2962200000	3771800000	3500700000	11406000	4114900000	125540000	1732400000	1069300000	181990000	2377400000	103730000	116040000	1274800000	267600000	1287200000	3531800000	160760000	258430000	3316500000	0	1	11	1333.69	1.3158e-115	299.42	371130000000	382	QAFTQQIEELK	Q5SX39;Q5SX40;G3UW82;P13541	Myh4;Myh1;Myh2;Myh3	Myosin-4;Myosin-1;Myosin-3	1607;655;1608;944
545470000	27718000	1518700000	0	37006000	286560000	77371000	66630000	76265000	1859800000	0	16139000	206400000	48750000	1967100000	70907000	69283000	2040100000	57970000	102310000	286340000	88998000	62304000	944860000	1	2	13	1544.79	7.6824e-124	286.08	370730000000	454	ERIEAQNKPFDAK	Q5SX39;Q5SX40;Q1WNQ6;P13542;Q8BGE8	Myh4;Myh1;Myh8	Myosin-4;Myosin-1;Myosin-8	1607;1608;945
60159000	0	55457000	0	42223000	110880000	33940000	61058000	0	64692000	0	39064000	131380000	41007000	44069000	24313000	14033000	181710000	15124000	49328000	39259000	49327000	34339000	1357500000	0	1	15	1646.78	5.7618e-291	366.9	367660000000	644	NLTEEMAGLDENIAK	Q5SX39;P13542	Myh4;Myh8	Myosin-4;Myosin-8	1607;945
491290000	0	1650000000	0	0	1332400000	1442200000	1057300000	562510000	2569500000	80357000	375960000	152710000	39273000	2435800000	78203000	80871000	2167100000	75328000	743260000	2416100000	155950000	63809000	2869300000	0	2	13	1341.73	2.0689e-76	253.72	363460000000	311	ALGTNPTNAEVKK	P05977;E0CZ30;E9PWG4	Myl1	Myosin light chain 1/3, skeletal muscle isoform	875;477
67373	684010	184620000	993210	9028900	666160000	5551400	0	1498800	88603000	0	370020	941290000	98461000	3174900000	1784900000	1135700000	1002000000	2390000000	1073000000	2405900000	462710000	1496200000	2664900000	1	0	8	979.499	1.1723e-06	177.78	359390000000	295	STHPHFVR	Q5SX39;Q91Z83;Q5SX40;G3UW82;B1AR69;P13542	Myh4;Myh7;Myh1;Myh2;Myh13;Myh8	Myosin-4;Myosin-7;Myosin-1;Myosin-8	1607;2210;655;1608;945;141
827710000	1108400000	2097200000	968840000	2081800000	2038200000	1663900000	2338900000	1211000000	2535200000	1627900000	159880000	1411700000	116990000	1858700000	1526600000	694880000	1082200000	1698500000	543080000	2375300000	145190000	1625200000	3374100000	0	1	16	1858.88	0	385.07	357830000000	569	LEQQVDDLEGSLEQEK	Q5SX39;Q91Z83;Q5SX40;Q02566;B8JJH5;G3UW82;P13542	Myh4;Myh7;Myh1;Myh6;Myh2;Myh8	Myosin-4;Myosin-7;Myosin-1;Myosin-6;Myosin-8	1607;2210;655;1608;945;1453
728320000	853340000	4503800000	766520000	2738500000	3012500000	3045800000	1904500000	1240700000	4383000000	1495200000	645010000	1965500000	41752000	966760000	1329700000	0	35578000	1542400000	148700000	3059200000	192200000	1559300000	859880000	2	1	17	1983.04	8.2607e-220	331.56	355910000000	622	GYSFVTTAEREIVRDIK	P68033;P62737;P63268;D3YZY0;P68134	Actc1;Acta2;Actg2;Acta1	Actin, alpha cardiac muscle 1;Actin, aortic smooth muscle;Actin, gamma-enteric smooth muscle;Actin, alpha skeletal muscle	1367;1364;1310
31196000	24288000	0	54594000	59676000	63874000	14723000	63559000	121720000	0	37020000	14261000	86046000	160530000	104720000	35932000	69915000	43386000	40909000	193900000	70727000	146600000	147200000	96410000	0	2	15	1547.77	6.3935e-106	227.47	352930000000	1258	AIGAFAAADSFDHKK	P32848	Pvalb	Parvalbumin alpha	1079
1127600	0	678590	0	98548000	1101700000	0	1312000000	686610000	1031900	125780000	0	162860000	45199000	1948700000	60707000	0	2064000000	50720000	475140000	1012800000	0	0	2370700000	0	1	12	1213.63	1.7027e-25	182.23	350870000000	166	ALGTNPTNAEVK	P05977;E0CZ30;E9PWG4	Myl1	Myosin light chain 1/3, skeletal muscle isoform	875;477
0	0	0	0	0	3752200	0	0	0	0	139240000	0	0	0	0	0	6278700	0	0	0	0	17791000	0	0	0	1	14	1478.8	3.7597e-41	192.65	344920000000	229	AAYLTSLNSADLLK	Q5SX39	Myh4	Myosin-4	1607
1172100000	1432200000	4137400000	1139500000	5009700000	4795100000	3145500000	2359000000	1478700000	3987000000	133680000	4145600	5018600000	32276000	2415400000	1507100000	1517000000	2253700000	1575100000	1512500000	3577700000	158430000	3631100000	5510100000	1	0	12	1487.7	9.6052e-39	222.72	343250000000	416	IEELEEELEAER	Q91Z83;Q02566	Myh7;Myh6	Myosin-7;Myosin-6	2210;1453
64164000	62145000	0	46646000	83243000	164430000	0	206100000	102300000	113920000	51758000	4939300	319290000	110920000	104300000	84039000	52578000	80443000	46243000	151270000	107880000	133360000	96014000	335160000	1	1	17	1951.96	2.8182e-258	337.45	332460000000	900	DTQLHLDDALRGQDDLK	Q5SX39	Myh4	Myosin-4	1607
364980000	59569000	5534100000	72736000	44703000	5607800000	5908500000	1662000000	1002200000	1548500000	188860000	1131000000	449730000	66034000	2104600000	66841000	42571000	536310000	69176000	551550000	1924200000	175080000	134440000	3101200000	0	1	12	1320.63	2.9183e-112	258.01	324730000000	1030	LTGAVMHYGNMK	Q5SX39;Q5SX40;G3UW82;B1AR69;P13542;P13541	Myh4;Myh1;Myh2;Myh13;Myh8;Myh3	Myosin-4;Myosin-1;Myosin-8;Myosin-3	1607;655;1608;945;944;141
538630000	1252400000	3788500	0	2720200000	3707700000	4548700000	2202100000	0	6039800	1969300000	89929000	1934800000	14969000	2625000000	175750000	779680000	1621000000	563040000	381720000	335930000	77159000	1104500000	4707000000	1	0	10	1129.54	6.3317e-16	192.64	323390000000	277	GYSFVTTAER	P68033;P62737;P63268;D3YZY0;P68134	Actc1;Acta2;Actg2;Acta1	Actin, alpha cardiac muscle 1;Actin, aortic smooth muscle;Actin, gamma-enteric smooth muscle;Actin, alpha skeletal muscle	1367;1364;1310
582220000	52850000	1038800000	17183000	54345000	100790000	20403000	95085000	113090000	1903100000	79308000	22340000	133500000	19477000	901360000	30611000	18825000	1724800000	28494000	58066000	196640000	34953000	56722000	1260200000	0	1	16	1661.87	0	307.07	316490000000	358	GQTVQQVYNSVGALAK	Q5SX39;Q5SX40	Myh4;Myh1	Myosin-4;Myosin-1	1607;1608
296230000	319440000	1094600000	247070000	1633000000	1762100000	2305700000	321540000	358390000	757040000	171090000	280010000	1727600000	715710000	588670000	363450000	345360000	429850000	267280000	709120000	771150000	617000000	488060000	1147400000	0	2	14	1722.85	2.8148e-212	318.35	310410000000	572	LNYKPQEEYPDLSK	P07310	Ckm	Creatine kinase M-type	884
820490000	59244000	2153900000	0	50458000	448870000	36994000	0	236320000	2964400000	242330000	47847000	188940000	40336000	1149900000	38705000	47942000	1747000000	45958000	109380000	200530000	80231000	96076000	1702300000	0	1	16	1687.88	6.6479e-58	200.77	307750000000	421	VLNASAIPEGQFIDSK	Q5SX39;Q5SX40;P13542;P13541	Myh4;Myh1;Myh8;Myh3	Myosin-4;Myosin-1;Myosin-8;Myosin-3	1607;1608;945;944
1208800000	1280500	2071300000	0	0	2499800000	3201600000	2779700000	1804600000	2737100000	463990000	366930	534220000	113390000	1796400000	347510000	310510000	1485900000	283650000	1035900000	2631300000	134160000	475410000	3033200000	0	1	11	1244.65	3.1797e-06	138.63	305440000000	349	DIDDLELTLAK	A2AQP0;Q5SX39;Q91Z83;Q5SX40;Q02566;B8JJH5;G3UW82;P13542;P13541	Myh7b;Myh4;Myh7;Myh1;Myh6;Myh2;Myh8;Myh3	Myosin-7B;Myosin-4;Myosin-7;Myosin-1;Myosin-6;Myosin-8;Myosin-3	1607;2210;655;1608;945;1453;944;97
57135000	3740100	1311700000	2322700	60627000	196800000	28740000	13572000	13717000	1830400000	4158300	1932200	133770000	67985000	2392900000	46772000	40474000	1492000000	27070000	115160000	230030000	60986000	65694000	1665700000	0	1	13	1501.74	1.905e-215	332.41	304900000000	613	IEDEQALGMQLQK	Q5SX39;Q5SX40	Myh4;Myh1	Myosin-4;Myosin-1	1607;1608
12318000	0	2181200000	0	327780000	1823200000	2520700000	1777900000	1136000000	2529300000	176610000	698010000	293130000	58815000	1245200000	0	40679000	1075200000	74722000	514250000	1597900000	108750000	112750000	84235000	0	0	16	1757.81	1.0139e-164	268.41	304070000000	559	AISEELDHALNDMTSI	P58771;Q8BP43;E9Q456	Tpm1	Tropomyosin alpha-1 chain	1242
0	0	2908100000	0	601910000	1001900000	2236700000	0	5864200	3044900000	462390000	802880000	726360000	101370000	2041200000	369610000	178110000	861990000	471010000	597790000	1897100000	103160000	443310000	2429100000	0	1	15	1560.82	1.1691e-92	256.52	301810000000	331	VGEATETALTTLVEK	Q8R429	Atp2a1	Sarcoplasmic/endoplasmic reticulum calcium ATPase 1	2098
82344000	23154000	21842000	3642200	7345600	34827000	0	65936000	18954000	16919000	88579000	6374600	23691000	18887000	0	16295000	7607400	32741000	13878000	22011000	23592000	29998000	19819000	1480000000	1	1	14	1560.78	1.5277e-114	277.31	300710000000	536	AGLLGTLEEMRDEK	Q5SX39	Myh4	Myosin-4	1607
798480000	94257000	2006500000	64230000	92953000	2482000000	2793800000	868460000	781450000	2937600000	29066000	393750000	226300000	93060000	1438800000	50228000	29828000	899040000	23526000	380570000	1263500000	71792000	70647000	731630000	2	0	16	1985.98	0	455.17	298350000000	554	QRLQNEVEDLMLDVER	G3UW82	Myh2		655
1081100000	131420000	5764300000	123670000	155290000	4954900000	4261300000	2706900000	1145600000	5090500000	265500000	1150400000	434420000	137660000	1755600000	114350000	80860000	1064400000	181490000	984190000	2562700000	443960000	215720000	3404600000	0	1	13	1501.78	3.1e-103	273.74	296860000000	593	LLGSIDIDHTQYK	Q5SX39;Q5SX40;G3UW82;P13542	Myh4;Myh1;Myh2;Myh8	Myosin-4;Myosin-1;Myosin-8	1607;655;1608;945
1213000000	197710000	3184300000	260830000	1167800000	4113500000	4517800000	1449000000	1156300000	4116800000	268790000	1165300000	1086500000	424330000	2023100000	296140000	319490000	1281200000	196350000	935200000	2273900000	400660000	373670000	2642500000	1	1	16	1832.93	2.6148e-243	340.9	296860000000	593	EAFTVIDQNRDGIIDK	P97457;F6ULR7	Mylpf	Myosin regulatory light chain 2, skeletal muscle isoform	1425;621
0	0	38276000	16101000	33522000	75008000	17099000	36206000	37453000	51071000	39788000	22691000	107260000	28724000	24183000	17854000	16254000	91061000	12000000	35437000	32243000	31732000	20995000	903310000	0	1	15	1681.75	6.0071e-116	276.75	292960000000	624	MEIDDLASNMETVSK	Q5SX39	Myh4	Myosin-4	1607
713540000	80872000	3551600000	47172000	124190000	2040300000	2645300000	2385800000	1047700000	3479600000	51259000	1016400000	370440000	129720000	1813300000	72810000	26534000	582640000	41746000	1011900000	2071800000	93009000	82290000	3072500000	0	1	15	1708.95	0	396.97	291090000000	778	VQLLHTQNTSLINTK	Q5SX39;Q5SX40;G3UW82;P13542	Myh4;Myh1;Myh2;Myh8	Myosin-4;Myosin-1;Myosin-8	1607;655;1608;945
0	3089000000	3743300000	1894100000	5505400000	2771100000	4737700000	2854200000	1784400000	3025700000	5523800000	0	5974200000	161780000	2013900000	3942700000	2231200000	1645800000	4328700000	1353300000	2783900000	0	4498100000	2712800000	1	0	13	1395.75	1.5464e-65	243.4	289440000000	130	ALGQNPTQAEVLR	P09542	Myl3	Myosin light chain 3	909
0	0	1008700000	1006400	2110000000	831460000	1118200000	6750700	0	1164100000	0	2791200	24790000	180780000	2007900000	2551100000	1477900000	1913700000	3247700000	1349600000	3014900000	313090000	2167700000	3031200000	1	0	9	1059.51	3.2617e-60	232.23	288030000000	216	ANSEVAQWR	Q5SX39;Q91Z83;Q5SX40;Q02566;G3UW82;B1AR69;P13542;P13541	Myh4;Myh7;Myh1;Myh6;Myh2;Myh13;Myh8;Myh3	Myosin-4;Myosin-7;Myosin-1;Myosin-6;Myosin-8;Myosin-3	1607;2210;655;1608;945;1453;944;141
31894000	39744000	45961000	34633000	64281000	169060000	34045000	72722000	86063000	88375000	4040300	0	235220000	51013000	59147000	30687000	15484000	38415000	21794000	64074000	54568000	39582000	37685000	219090000	2	0	20	2330.15	0	462.28	287470000000	602	ANLMQAEIEELRASLEQTER	Q5SX39	Myh4	Myosin-4	1607
5366000	5190200000	3944900000	1982400000	7222900000	4613500000	5321000000	4510000000	1322200000	4956600000	5147500000	1639100000	6122800000	62832000	2057400000	3380200000	2234200000	2043300000	5181100000	1199800000	3520100000	138300000	4527000000	4366000000	1	1	23	2092.11	8.8921e-85	240.94	284950000000	321	AAPAPAAAPAAAPAAAPEPERPK	P09542	Myl3	Myosin light chain 3	909
25327000	0	13888000	6120900	0	88059000	3587300	16957000	30058000	19365000	0	16826000	0	30577000	22348000	0	0	14607000	0	0	19741000	41091000	0	714070000	0	2	18	2088.02	0	558.41	284860000000	384	TKLEQQVDDLEGSLEQEK	Q5SX39;P13542	Myh4;Myh8	Myosin-4;Myosin-8	1607;945
846790000	1387900000	1998100000	792320000	705940000	3034800000	2921000000	1358100000	1357900000	2953200000	1557900000	789430000	1989400000	239220000	1264300000	1464200000	564530000	882230000	1291400000	857220000	2127500000	355940000	1683100000	2276600000	1	1	30	3490.64	0	481.46	283450000000	1314	FRCPETLFQPSFIGMESAGIHETTYNSIMK	P68033;P62737;P63268;P68134	Actc1;Acta2;Actg2;Acta1	Actin, alpha cardiac muscle 1;Actin, aortic smooth muscle;Actin, gamma-enteric smooth muscle;Actin, alpha skeletal muscle	1367;1364;1310
21957000	1829800000	54200000	1174900000	4243900000	115130000	182910000	87942000	28435000	39477000	2859700000	21090000	4206700000	0	0	1824900000	1131500000	85139000	1837500000	130780000	29006000	6950300	2579300000	859360000	1	1	18	1966.01	1.2681e-193	305.1	280280000000	518	DLEEATLQHEATAAALRK	Q5SX39;Q91Z83;Q02566;P13542	Myh4;Myh7;Myh6;Myh8	Myosin-4;Myosin-7;Myosin-6;Myosin-8	1607;2210;945;1453
876790000	312030000	596330000	1284300000	725300	0	3162900000	1555500000	1195300000	2627300000	1950100000	965230	1040600	0	4666500000	3947800000	1897000000	681060000	4021600000	1711000000	4585000000	470150000	2451400000	3413900000	1	0	10	1184.54	2.1296e-20	201.46	278850000000	230	EQDTSAHLER	A2AQP0;Q5SX39;Q91Z83;Q5SX40;Q02566;G3UW82;B1AR69;M0QWL0;P13542;P13541	Myh7b;Myh4;Myh7;Myh1;Myh6;Myh2;Myh13;Myh8;Myh3	Myosin-7B;Myosin-4;Myosin-7;Myosin-1;Myosin-6;Myosin-8;Myosin-3	1607;2210;655;1608;945;1453;944;141;97
7796800	71161000	15038000	9805800	481630000	337650000	2344000000	18877000	43828000	194640000	4505100	0	214770000	132330000	62240000	37382000	1358800	51321000	34419000	48283000	79157000	50540000	19288000	75210000	0	1	24	2594.35	0	490.9	274560000000	1060	VIHDNFGIVEGLMTTVHAITATQK	P16858;A0A0A0MQF6;S4R1W1;D3YYI5;S4R257;D3Z0Z9	Gapdh;Gm3839;Gm7293	Glyceraldehyde-3-phosphate dehydrogenase	975;2893;389
388200000	19047000	3714400000	65273000	52343000	2475400000	3754200000	1344800000	1313600000	3495200000	171200000	879880000	197710000	74931000	906210000	96841000	124320000	576720000	44220000	403350000	2412000000	198550000	82976000	2178800000	1	1	15	1680.92	1.1356e-184	318.62	274220000000	1155	RVIQYFATIAVTGDK	Q5SX39;G3UW82;B1AR69;P13542	Myh4;Myh2;Myh13;Myh8	Myosin-4;Myosin-8	1607;655;945;141
1847300	971470000	2858300000	728870000	2432400000	2092000000	2594200000	1910700000	1077700000	2375500000	1512700000	819380000	2236100000	86185000	1387700000	1333600000	572660000	648050000	1358000000	613120000	1605000000	230670000	1497400000	2204800000	0	1	9	1130.6	1.9212e-07	156.83	268040000000	228	MELQEIQLK	E9Q5J9;Q8K0Z5;E9Q7Q3;D3Z6I8;D3YVR0;P21107	Tpm3	Tropomyosin alpha-3 chain	1007;541;551
2457000	0	4659200000	0	209350000	4466500000	3054800000	1720400000	3073900	3350700000	0	1009600000	0	0	1717100000	132230000	70199000	1022800000	89765000	1016700000	2448200000	170530000	177430000	2791700000	0	1	9	1083.63	3.2196e-10	177.91	265470000000	232	IQLELNQVK	Q5SX39;Q5SX40;G3UW82;P13542	Myh4;Myh1;Myh2;Myh8	Myosin-4;Myosin-1;Myosin-8	1607;655;1608;945
955610000	1233900000	2755600000	863280000	2091600000	5335500000	2051400000	2085300000	1485600000	2214100000	741160000	973920000	3670800000	979780000	1553500000	1010800000	843870000	990970000	858170000	1752300000	1003100000	1637900000	1648200000	1121000000	2	0	12	1454.8	1.9053e-83	263.89	261830000000	685	RHPDYSVSLLLR	P07724	Alb	Serum albumin	886
30105000	100450000	41767000	1678000	43490000	111010000	16057000	45782000	36360000	73122000	78452000	31257000	176950000	70052000	47591000	41940000	38518000	147930000	38029000	150730000	150600000	46654000	57691000	259010000	1	1	13	1614.78	5.4984e-172	323.24	260370000000	432	VRELENEVENEQK	Q5SX39	Myh4	Myosin-4	1607
2219000000	347250000	0	217400000	0	0	0	0	1554000000	0	380190000	774990000	0	123660000	1876900000	177570000	77641000	644720000	224910000	572820000	2264300000	304200000	293920000	2755000000	0	1	13	1318.64	1.0675e-38	207.12	260180000000	228	GADPEDVITGAFK	P97457	Mylpf	Myosin regulatory light chain 2, skeletal muscle isoform	1425
0	0	0	0	0	0	0	7223100	2925000	0	13122000	26657000	0	0	0	0	0	3373900000	0	8158000000	0	4159400000	16919000000	0	1	1	7	799.528	0.019531	121.31	259800000000	45	RGILTLK	G3UZ07;E9Q606;Q8BFZ3;P68033;P63260;G3UYG0;P60710;E9Q5F4;P62737;P63268;D3YZY0;D3Z2K3;P68134	Actg1;Actb;Actbl2;Actc1;Acta2;Actg2;Acta1	Beta-actin-like protein 2;Actin, alpha cardiac muscle 1;Actin, cytoplasmic 2;Actin, cytoplasmic 2, N-terminally processed;Actin, cytoplasmic 1;Actin, cytoplasmic 1, N-terminally processed;Actin, aortic smooth muscle;Actin, gamma-enteric smooth muscle;Actin, alpha skeletal muscle	1367;1364;1310;1354;1255;673;1857
726790	8155800	390010000	882150	807620000	984410000	1493900000	16483000	373210000	579180000	8908700	6515700	1510700000	409330000	425360000	231030000	11907000	380610000	110310000	347170000	266650000	326040000	183520000	661800000	3	0	15	1801.9	3.9019e-191	316.8	258380000000	354	RLQSIGTENTEENRR	P05064;A6ZI44;D3YWI1;D3YV98;D3Z510	Aldoa	Fructose-bisphosphate aldolase A;Fructose-bisphosphate aldolase	870
643390	0	0	0	0	0	0	0	0	2402100	0	0	0	0	0	0	0	0	0	0	0	0	0	3517400	2	0	12	1388.68	2.4617e-166	306.64	253100000000	278	ARLHTESGEFSR	Q5SX39	Myh4	Myosin-4	1607
29003000	38960000	25918000	30573000	58424000	241260000	34858000	45859000	58940000	27907000	58406000	0	171120000	53938000	72555000	44663000	32778000	20455000	0	53463000	91279000	40921000	31585000	332150000	1	1	18	2141	0	553.15	249510000000	863	KMEGDLNEMEIQLNHANR	Q5SX39;P13542	Myh4;Myh8	Myosin-4;Myosin-8	1607;945
313060000	232820000	587950000	354990000	512130000	1853600000	1381700000	491520000	474430000	881080000	301620000	304750000	660770000	631040000	840750000	0	150400000	154410000	249860000	549220000	657840000	777430000	484560000	1208700000	0	1	9	1061.58	7.6506e-05	144.09	239960000000	169	VLTPDLYNK	P07310	Ckm	Creatine kinase M-type	884
1150000000	95762000	2651200000	22783000	112480000	2289700000	2003300000	1877400000	1530900000	2817200000	128890000	1097300000	209690000	70142000	1414500000	82060000	20527000	55118000	62816000	402250000	1759600000	78754000	88378000	1091500000	1	1	17	1972.92	0	388.46	239700000000	632	DQGGYEDFVEGLRVFDK	P05977;A0A087WRZ7;E9PWG4	Myl1	Myosin light chain 1/3, skeletal muscle isoform	875;477
869740	89477000	4345300000	0	105770000	3163400000	3422400000	2078700000	1202200000	2968200000	118400000	254470000	310570000	27875000	2012300000	15237000	81040000	1312800000	52307000	975240000	654260000	101360000	97646000	2269000000	0	1	10	1211.55	1.8614e-12	185.08	238970000000	322	EFEMSNLQSK	Q5SX39;Q5SX40;G3UW82	Myh4;Myh1;Myh2	Myosin-4;Myosin-1	1607;655;1608
0	0	600750000	0	770530000	823150000	1750200000	362530000	0	620090000	175850000	0	1107700000	2371100	362050000	170750000	192160000	220060000	154980000	459630000	489040000	337560000	244850000	962520000	1	0	14	1506.7	6.8717e-78	250.52	238640000000	277	GGDDLDPNYVLSSR	P07310	Ckm	Creatine kinase M-type	884
336530000	1392200000	4798400000	266370000	2580200000	2266400000	3012600000	1636100000	405220000	3472400000	1628300000	317290000	1714500000	23103000	1402100000	983140000	347650000	92540000	847140000	500830000	1527400000	44171000	1436000000	1586300000	2	0	14	1626.84	8.4095e-167	315.29	237940000000	460	GYSFVTTAEREIVR	P68033;P62737;P63268;D3YZY0;P68134	Actc1;Acta2;Actg2;Acta1	Actin, alpha cardiac muscle 1;Actin, aortic smooth muscle;Actin, gamma-enteric smooth muscle;Actin, alpha skeletal muscle	1367;1364;1310
0	3493200000	26906000	2386200000	4411800000	60766000	127940000	166270000	30952000	47678000	4077900000	27871000	3402700000	46747000	49451000	6330500000	2806300000	232920000	7024800000	291320000	43477000	129600000	3580300000	63294000	1	1	16	1816.86	4.0382e-220	330.74	236320000000	183	RQAEEAEEQANTNLSK	Q91Z83;Q02566	Myh7;Myh6	Myosin-7;Myosin-6	2210;1453
24291000	6627800	0	0	0	11021000	0	7560200	0	0	53243000	0	9752800	0	4762200	0	0	74876000	3235200	4618500	3663700	6158300	0	431830000	0	1	20	1866.91	3.0527e-231	316.32	234330000000	2730	TLAFLFSGGQAAEAEGGGGK	Q5SX39	Myh4	Myosin-4	1607
723940000	118470000	1133400000	93214000	115490000	1135300000	890290000	1590500000	984070000	1300400000	246560000	1183700000	199670000	79807000	1120900000	119910000	60243000	841500000	95375000	619270000	1581900000	170920000	124680000	2358100000	0	1	13	1537.71	1.4636e-65	243.85	230580000000	386	SIDDLEDELYAQK	Q8BSH3;P58771;Q8BP43;E9Q456	Tpm1	Tropomyosin alpha-1 chain	1921;1242
64963000	19575000	137410000	62594000	293710000	167830000	850690000	107610000	125110000	249310000	72180000	68536000	122440000	144110000	110330000	11539000	63280000	209870000	20525000	118510000	84727000	71588000	49426000	464880000	0	1	17	1784.95	7.5538e-285	356.31	230330000000	845	LGSSEVEQVQLVVDGVK	P07310	Ckm	Creatine kinase M-type	884
921260	0	3883900000	75286000	248760000	3198900000	2483700000	1409400000	636630000	3167600000	0	555840000	608050000	263850000	1335900000	156600000	142980000	1019600000	88264000	614300000	1747900000	228500000	180520000	2384300000	2	0	12	1380.65	3.2655e-142	313.87	228480000000	524	EDLRDTFAAMGR	P97457;F6ULR7	Mylpf	Myosin regulatory light chain 2, skeletal muscle isoform	1425;621
49925000	60305000	41638000	0	47750000	148960000	36197000	72667000	37397000	77623000	138420000	27677000	124080000	49359000	81355000	30061000	27376000	161550000	24946000	39842000	55157000	51476000	23190000	2031400000	0	1	13	1492.67	2.4862e-38	204.49	226830000000	238	LAQESTMDIENDK	Q5SX39;P13542	Myh4;Myh8	Myosin-4;Myosin-8	1607;945
1071000000	2044400000	2983300000	1347300000	3253600000	3457400000	3850600000	1920700000	1509300000	3403400000	2226500000	772290000	2711900000	84609000	1531600000	1907700000	26456000	1595500000	3252900000	982940000	2834500000	157590000	4026900000	2572600000	0	1	16	1966.94	3.1324e-67	248.97	226680000000	598	MMDFETFLPMLQHISK	P09542	Myl3	Myosin light chain 3	909
494950000	66386000	2195800000	0	0	2050200000	1507300000	755480000	429740000	2463800000	41792000	0	0	34301000	793710000	21790000	38274000	1344300000	12836000	684000000	588170000	36804000	46049000	1556600000	1	0	13	1483.66	2.1457e-66	250.57	225250000000	250	DQGGYEDFVEGLR	P05977;A0A087WRZ7;E9PWG4	Myl1	Myosin light chain 1/3, skeletal muscle isoform	875;477
0	106840	419670	0	73002000	197350	382860	23971000	55997000	111690	256370	23795000	60353000	337110000	495050000	160100000	110190000	0	114420000	251860000	434140000	357210000	97961000	398430000	0	2	11	1347.69	4.5668e-77	256.43	219650000000	375	HKTDLNHENLK	P07310	Ckm	Creatine kinase M-type	884
705660000	580800000	1819100000	486510000	2092400000	1573100000	2097100000	1571400000	514680000	2060800000	1057000000	676830000	2347000000	85743000	2286900000	693420000	494990000	1489600000	738320000	536100000	1166100000	63569000	1542100000	3333700000	0	1	13	1392.66	4.3831e-38	200.98	218930000000	575	AITDAAMMAEELK	A2AQP0;Q5SX39;Q91Z83;Q5SX40;Q02566;G3UW82;B1AR69;M0QWL0;P13542;P13541	Myh7b;Myh4;Myh7;Myh1;Myh6;Myh2;Myh13;Myh8;Myh3	Myosin-7B;Myosin-4;Myosin-7;Myosin-1;Myosin-6;Myosin-8;Myosin-3	1607;2210;655;1608;945;1453;944;141;97
0	82871000	121540000	98730000	242130000	259530000	331690000	60766000	291430000	104900000	519760000	0	366560000	1094100000	688910000	395350000	386740000	36157000	362050000	1293300000	970410000	1171800000	662030000	3216700000	1	1	12	1341.7	2.8738e-18	171.62	214230000000	605	ADDGRPFPQVIK	P05064;A6ZI44;D3YWI1;Q9CPQ9;A6ZI46;D3YV98;D3Z510	Aldoa;Aldoart1	Fructose-bisphosphate aldolase A;Fructose-bisphosphate aldolase	870
960000000	106960000	4331300000	46346000	125530000	3672100000	3610500000	2894800000	1753000000	4930900000	253550000	1157000000	174690000	14553000	1924700000	169760000	0	45271000	49729000	236550000	3001000000	72298000	49240000	1752200000	1	1	17	1896.97	0	381.89	213540000000	446	GSSFQTVSALFRENLNK	Q5SX39;Q5SX40;G3UW82;P13542;P13541	Myh4;Myh1;Myh2;Myh8;Myh3	Myosin-4;Myosin-1;Myosin-8;Myosin-3	1607;655;1608;945;944
54703000	0	110900000	40904000	40516000	278000000	63205000	88453000	123160000	149580000	0	58488000	204220000	92415000	83821000	62166000	42261000	87678000	37448000	124170000	102470000	109360000	86359000	208260000	0	1	8	968.515	0.0037356	115.46	210830000000	460	FFQMVGLK	P32848	Pvalb	Parvalbumin alpha	1079
447790000	0	50045000	2218700	26791000	0	0	0	0	37533000	47985000	0	0	15189000	1272500000	1336600	14205000	467760000	17810000	33430000	99182000	1748700	24067000	1168700000	0	1	8	948.477	8.1243e-06	167.9	205200000000	295	MVALMQEK	Q5SX39;Q5SX40	Myh4;Myh1	Myosin-4;Myosin-1	1607;1608
844340000	15214000	1345800000	65566000	39179000	1376000000	1604100000	3106400000	1586100000	1819000000	571290000	1988300000	160670000	176900000	2280900000	169940000	0	2600300000	1756400	1041300000	3842000000	4101100	36975000	129260000	1	0	16	1886.92	8.5145e-244	338.89	203550000000	2988	DLMELQALIDSHFEAR	A2A6J1;A2A6I8;A2A6H6;Z4YKF8;Z4YKG3;Z4YKG8;Z4YJU0;Z4YNB2;Q9QZ47;Z4YKH8;Z4YKE7;J3QP61;A2A6I3;A2A6J0	Tnnt3	Troponin T, fast skeletal muscle	43;42;41
1945800000	0	4181700	1548500000	1563800000	1750400000	1699400000	0	2044200000	1859500000	0	0	1624300000	796150000	1785000000	0	1274800000	2055500000	2191500000	2253400000	2922700000	2587700000	2171000000	3123200000	1	1	20	2213.21	2.0735e-08	95.205	202100000000	194	TLDNDIMLIKLSSPVTLNAR	Q792Z1	Try10		1801
881210000	1174500000	2138600000	989390000	2047000000	1593600000	1935500000	1615400000	1123800000	2348900000	1430700000	555860000	1655200000	127200000	1707800000	1685800000	660230000	481980000	1865700000	322710000	1914000000	123750000	519690000	1955500000	2	1	21	2385.24	2.7498e-126	235.92	201880000000	470	LVILEGELERSEERAEVAESK	P58774	Tpm2	Tropomyosin beta chain	1243
191050000	235100000	451420000	221300000	574760000	510470000	1658600000	534610000	134180000	592790000	0	193660000	681300000	429890000	227790000	334810000	190270000	283530000	268840000	342080000	409670000	292010000	307320000	956270000	1	2	20	2295.3	7.535e-254	348.68	199930000000	607	LVINGKPITIFQERDPTNIK	P16858;A0A0A0MQF6;S4R1W1;S4R257;S4R1W8	Gapdh;Gm3839	Glyceraldehyde-3-phosphate dehydrogenase	975;2893;2892
0	0	398180000	167790000	4161200000	2178300000	2913200000	1898400000	204480000	596650000	3165600000	0	2486400000	61811000	1886000000	612560000	323500000	673230000	1446600000	1742200000	1811300000	337230000	2520900000	1369800000	0	3	11	1328.76	1.3596e-74	237.08	198650000000	275	KKEEEELIALK	E9Q688;O88346;J3QPC8;E9QA86;E9Q0G9;E9PZB4;E9PVN9;A2A6J1;A2A6I8;A2A6H6;Z4YKF8;Z4YKG3;Z4YKG8;Z4YJU0;Z4YNB2;Q9QZ47;Z4YKH8;Z4YKE7;J3QP61;A2A6I3;A2A6J0	Tnnt1;Tnnt3	Troponin T, slow skeletal muscle;Troponin T, fast skeletal muscle	543;43;42;41
85726000	48385000	211340000	82525000	231820000	591700000	565190000	139250000	154270000	291900000	0	118510000	548330000	195620000	190680000	104860000	72543000	126030000	23314000	175420000	217640000	183720000	129800000	693440000	0	1	12	1301.63	1.6649e-25	182.41	197290000000	361	GQSIDDMIPAQK	P07310	Ckm	Creatine kinase M-type	884
153390000	83989000	1895800000	123070000	541540000	1099300000	1136600000	58845000	241100000	2574800000	125790000	310200000	387260000	56099000	735930000	108630000	136210000	439320000	164140000	256540000	712770000	98548000	198150000	1081000000	0	1	16	1501.84	9.1924e-41	170.42	197260000000	1028	AVGIVATTGVSTEIGK	Q8R429	Atp2a1	Sarcoplasmic/endoplasmic reticulum calcium ATPase 1	2098
2929200	105380000	257070000	66935000	610580000	336730000	1031300000	211240000	245800000	342790000	97859000	78474000	322180000	296630000	137970000	95124000	51830000	12793000	47131000	111280000	164690000	69843000	143050000	525180000	1	0	20	2106.09	0	384.53	196720000000	715	IGEHTPSALAIMENANVLAR	P05064;A6ZI44;D3YWI1	Aldoa	Fructose-bisphosphate aldolase A;Fructose-bisphosphate aldolase	870
200370000	214900000	1157200000	282770000	1766700000	1293800000	1870700000	621870000	481290000	2121800000	839290000	345250000	622460000	0	472410000	699290000	306520000	788280000	861160000	489230000	1229200000	136480000	726450000	1189800000	0	2	19	2494.21	0	395.34	196720000000	894	LQQFFNHHMFVLEQEEYKK	Q5SX39;Q91Z83;Q5SX40;Q02566;B8JJH5;G3UW82;B1AR69;P13542;P13541	Myh4;Myh7;Myh1;Myh6;Myh2;Myh13;Myh8;Myh3	Myosin-4;Myosin-7;Myosin-1;Myosin-6;Myosin-8;Myosin-3	1607;2210;655;1608;945;1453;944;141
2412100	89931000	1837500000	0	52652000	1701500000	1688600000	1458000000	1123900000	2200100000	127990000	0	159020000	71834000	1259700000	37981000	48418000	1211600000	0	746690000	1381300000	199150000	97950000	2555300000	1	0	12	1298.66	3.6e-48	216.97	196140000000	382	GSSFQTVSALFR	Q5SX39;Q5SX40;G3UW82;P13542;P13541	Myh4;Myh1;Myh2;Myh8;Myh3	Myosin-4;Myosin-1;Myosin-8;Myosin-3	1607;655;1608;945;944
47196000	66431000	44017000	55567000	64201000	130880000	0	56927000	51636000	48696000	62493000	0	131380000	122080000	158230000	57178000	0	20670000	26216000	49427000	138280000	104360000	57405000	926880000	2	0	13	1514.77	3.8742e-216	337.22	192390000000	217	RVAEQELLDASER	Q5SX39	Myh4	Myosin-4	1607
0	2870800000	2087100	2083600000	5629700000	165840000	295080000	171060000	47355000	2847400	3671900000	39966000	3888500000	53919000	40295000	3011200000	1409200000	155030000	2967400000	267830000	48513000	62300000	3043400000	46589000	0	1	20	2211.05	0	423.67	192230000000	282	LELQSALEEAEASLEHEEGK	Q91Z83;Q02566	Myh7;Myh6	Myosin-7;Myosin-6	2210;1453
4532900	3895200000	33466000	2207900000	3924100000	74369000	228310000	69484000	39991000	0	7202900000	34406000	2514800000	66093000	43549000	3645800000	916190000	72589000	3007100000	164280000	55462000	118510000	4031600000	28957000	1	1	13	1585.79	4.1307e-152	311.95	191240000000	200	VRELENELEAEQK	Q91Z83;Q02566	Myh7;Myh6	Myosin-7;Myosin-6	2210;1453
0	1068200	36795000	0	33192000	104890000	21831000	49544000	60075000	57413000	0	0	108360000	1754300	0	32410000	0	0	19488000	48404000	32006000	33437000	30549000	46174000	0	0	13	1379.68	7.474e-32	156.58	190780000000	692	IGVEEFSTLVAES	P32848	Pvalb	Parvalbumin alpha	1079
228010000	274250000	576640000	13130000	593600000	997880000	719280000	362420000	271830000	757680000	15680000	178400000	67280000	45261000	444240000	20672000	32305000	1477900000	12520000	289220000	371860000	54820000	29822000	1027900000	1	0	14	1701.82	1.4469e-116	283.45	190090000000	483	LQNEVEDLMLDVER	G3UW82	Myh2		655
183810000	0	1559700000	0	14355000	2594100000	2636600000	585870000	585090000	1607900000	29314000	246900000	99908000	34860000	1206700000	12995000	38280000	959360000	9456500	408710000	1808300000	86973000	0	1652100000	1	2	13	1549.82	2.2872e-166	315.21	188290000000	469	RKPLNIDHLSDDK	A2A6J1;A2A6I8;A2A6H6;Z4YKF8;Z4YKG3;Z4YKG8;Z4YJU0;Z4YNB2;Q9QZ47;Z4YKH8;Z4YKE7;J3QP61;A2A6I3;A2A6J0	Tnnt3	Troponin T, fast skeletal muscle	43;42;41
1957900000	242680000	5944200000	0	149320000	5235900000	5561100000	3963700000	2685200000	7718400000	28138000	2019800000	620640000	0	3083400000	126260000	157760000	55914000	120630000	1368700000	6900900000	244080000	164940000	6888800000	0	1	14	1507.76	4.3847e-184	316.92	187680000000	305	LQAAEEHVEAVNAK	G3UW82;P13542	Myh2;Myh8	Myosin-8	655;945
488830000	155250000	2657900000	160970000	53424000	19019000	16815000	19052000	6295500	43143000	246740000	5000100	186040000	6058600	70995000	214230000	148220000	504650000	198030000	546320000	1646800000	145030000	15098000	2374000000	0	1	9	1079.46	0.0002509	185.81	187590000000	260	NEELDAMMK	P97457;F6ULR7	Mylpf	Myosin regulatory light chain 2, skeletal muscle isoform	1425;621
2435600000	76770000	6971000000	66751000	72821000	4837700000	6351300000	5390900000	3064200000	5910200000	76514000	3341300000	144000000	110190000	5887800000	53191000	52450000	2488400000	49696000	2345900000	6501700000	84803000	86984000	4147500000	1	0	17	1867.93	0	369.48	187430000000	388	DLEEATLQHEATAATLR	Q5SX40;G3UW82;B1AR69	Myh1;Myh2;Myh13	Myosin-1	655;1608;141
2101300000	210070000	5089100000	191680000	202850000	4116000000	3577500000	4253100000	1977800000	4217800000	145860000	2796500000	497970000	268950000	3289400000	236660000	105700000	1451800000	150860000	2014200000	4372800000	367810000	193500000	4355600000	1	1	17	1965.98	1.3762e-220	335.48	186470000000	587	DTQLHLDDALRGQEDLK	Q5SX40;G3UW82;P13542;P13541	Myh1;Myh2;Myh8;Myh3	Myosin-1;Myosin-8;Myosin-3	655;1608;945;944
379320000	388750000	2338300000	329860000	878620000	991080000	1316300000	199150000	787890000	1749400000	561990000	474730000	945260000	71874000	1048400000	500940000	282560000	263400000	700140000	415900000	1132900000	106470000	733970000	1693500000	0	1	13	1322.67	2.7833e-06	131.69	186410000000	335	NMLFSGTNIAAGK	Q8R429;O55143;J3KMM5	Atp2a1;Atp2a2	Sarcoplasmic/endoplasmic reticulum calcium ATPase 1;Sarcoplasmic/endoplasmic reticulum calcium ATPase 2;Calcium-transporting ATPase	2098;803
143430000	218900000	348030000	0	969160000	1288000000	1583400000	319830000	403030000	178910000	169610000	35863000	1816700000	248330000	236520000	151770000	122810000	160780000	108530000	343510000	331510000	269090000	280250000	949990000	2	0	16	1807.93	1.4362e-243	340.9	185820000000	636	FSNEEIAMATVTALRR	P05064;A6ZI44;Q9CPQ9;A6ZI46	Aldoa;Aldoart1	Fructose-bisphosphate aldolase A;Fructose-bisphosphate aldolase	870
0	0	2593200000	0	0	939900000	999810000	0	373080000	1480300000	189700000	541120000	475240000	635250	1462700000	233470000	152710000	569720000	260180000	521630000	1459700000	125460000	202620000	2929100000	1	1	12	1404.67	1.0102e-144	299.04	185200000000	365	IRDQMAATEQDK	Q8R429	Atp2a1	Sarcoplasmic/endoplasmic reticulum calcium ATPase 1	2098
0	3120800000	0	1244300000	5126600000	0	0	0	0	0	4154000000	0	4199900000	1773700	41012000	4415700000	1882400000	112430000	5035200000	168290000	127430000	181780000	8116000	86761000	1	1	16	1830.79	0	412.2	184590000000	125	QREEQAEPDGTEEADK	Q91Z83	Myh7	Myosin-7	2210
42673000	2577200000	167050000	481780000	4868500000	254810000	327290000	254800000	77475000	106990000	3681100000	97217000	4382800000	66515000	88162000	4680700000	1090300000	49484000	6028900000	317200000	115220000	59804000	4788700000	112310000	0	1	19	2151.01	0	473.04	184480000000	210	ALQEAHQQALDDLQAEEDK	Q91Z83;Q02566;B8JJH5	Myh7;Myh6	Myosin-7;Myosin-6	2210;1453
0	188330000	2211300000	83876000	554360000	1264600000	1765900000	92807000	853290000	2179700000	33372000	0	485160000	56821000	747420000	176350000	22981000	158210000	271040000	302700000	1303600000	98636000	222750000	1362400000	2	1	23	2403.31	7.0999e-123	219.94	181730000000	413	ARDIVPGDIVEVAVGDKVPADLR	B1ATS4;B1ATS5;E9Q559;Q64518	Atp2a3	Calcium-transporting ATPase;Sarcoplasmic/endoplasmic reticulum calcium ATPase 3	148
0	0	578300000	0	0	0	1528000000	0	0	574030000	0	0	865090000	0	421940000	198720000	0	0	96250000	345760000	354640000	292050000	215660000	888720000	1	0	10	1230.62	1.6761e-12	187.99	181670000000	275	DLFDPIIQDR	P07310	Ckm	Creatine kinase M-type	884
113990000	129200000	128310000	59090000	620670000	660530000	857040000	154990000	233210000	360610000	118010000	39727000	523810000	180870000	248480000	46397000	19406000	233600000	23222000	134180000	75519000	74612000	105460000	678870000	1	0	13	1642.81	4.3431e-93	262.64	181360000000	842	SFLVWVNEEDHLR	P07310	Ckm	Creatine kinase M-type	884
101510000	108780000	117870000	15891000	300470000	243180000	451910000	219250000	212560000	182660000	87039000	46149000	523880000	144090000	118410000	108580000	81102000	96948000	63585000	196370000	137460000	150460000	138710000	680430000	1	0	23	2271.13	1.4206e-292	335.84	180990000000	526	GVVPLAGTNGETTTQGLDGLSER	P05064;A6ZI44;D3YWI1;Q9CPQ9;A6ZI46;D3YV98	Aldoa;Aldoart1	Fructose-bisphosphate aldolase A;Fructose-bisphosphate aldolase	870
1234400000	67291000	5095500000	60360000	0	6609500000	7200200000	5280500000	2284100000	5599700000	0	3005000000	315650000	98892000	2939900000	143340000	77532000	202680000	25960000	2836300000	6871000000	193350000	110390000	1248000000	1	1	16	1832.85	1.9393e-220	333.98	178300000000	213	RQAEEAEEQSNTNLSK	G3UW82	Myh2		655
6651200	0	2557100000	0	0	2358100000	2463500000	22618000	14009000	2376200000	0	14664000	89656000	30154000	1296100000	21367000	15825000	776890000	17106000	574200000	1532200000	22523000	29235000	1674900000	0	1	15	1561.74	9.2579e-61	225.09	177420000000	404	ALSSMGANYSSYLAK	A2A6J1;A2A6I8;A2A6H6;Z4YKF8;Z4YKG3;Z4YKG8;Z4YJU0;Z4YNB2;Q9QZ47;Z4YKH8;Z4YKE7;J3QP61;A2A6I3;A2A6J0	Tnnt3	Troponin T, fast skeletal muscle	43;42;41
0	6077500000	49886000	486060000	7427000000	212030000	231960000	120230000	11785000	71582000	6496600000	11606000	6289600000	44447000	66528000	4320500000	826230000	234270000	1199500000	418090000	92144000	190040000	3956600000	150150000	1	0	10	1271.56	7.3781e-35	231.42	177010000000	162	TLEDQMNEHR	Q91Z83	Myh7	Myosin-7	2210
0	0	46361000	14792000	52210000	115960000	26091000	0	0	30407000	38703000	0	127370000	46547000	0	23432000	41676000	57131000	13009000	73725000	40260000	45838000	31896000	207200000	1	0	12	1358.67	5.9712e-39	225.63	176950000000	182	VAEQELLDASER	Q5SX39	Myh4	Myosin-4	1607
0	0	0	0	0	0	0	0	0	0	0	424500	0	833180	1634900000	1670100000	878390000	373590000	2078200000	799090000	2055800000	271730000	1134900000	2674700000	0	1	7	800.476	0.0028564	134.66	176250000000	71	IVTNNLK	P58774	Tpm2	Tropomyosin beta chain	1243
379270000	540370000	3106700000	279830000	990900000	3351700000	2858100000	1437100000	706460000	3210000000	790320000	879600000	1184000000	53482000	2121300000	810640000	273850000	1513500000	806180000	675450000	2602400000	214850000	930550000	4303500000	1	1	14	1558.72	1.3437e-114	278.08	174860000000	518	ENALDRAEQAEADK	F8WID5;Q8BSH3;B7ZNL3;E9Q448;P58771;Q8BP43	Tpm1	Tropomyosin alpha-1 chain	646;1921;1242;177
32005000	710050000	1544000000	43435000	997580000	1781700000	1458900000	1122300000	63977000	1510500000	716220000	227500000	1092800000	54909000	920680000	261610000	444170000	1136000000	304150000	540850000	916160000	66723000	626440000	1624700000	1	0	8	1009.52	4.5894e-21	200.16	174790000000	365	EAFLLFDR	P05977;E0CZ30;E9PWG4;P09542	Myl1;Myl3	Myosin light chain 1/3, skeletal muscle isoform;Myosin light chain 3	909;875;477
35567000	2417900000	95901000	1851000000	5379000000	276440000	253980000	239970000	59738000	140080000	3517800000	52723000	5045400000	46468000	42103000	2487000000	1426300000	93585000	2402500000	169470000	59158000	84729000	2405300000	79620000	0	1	13	1534.72	6.2428e-66	248.36	174420000000	150	LTQESIMDLENDK	Q91Z83;Q02566;B8JJH5	Myh7;Myh6	Myosin-7;Myosin-6	2210;1453
129030000	618800000	2454000000	576330000	1107500000	3753400000	2130400000	1254100000	933290000	2171400000	513410000	335500000	1646200000	25329000	462200000	599300000	243730000	467720000	1033900000	235280000	981810000	54874000	873800000	498550000	1	2	17	2052	2.1933e-113	231.62	173820000000	695	YETDAIQRTEELEEAKK	Q5SX39;Q91Z83;Q5SX40;Q02566;G3UW82;B1AR69;P13542;P13541	Myh4;Myh7;Myh1;Myh6;Myh2;Myh13;Myh8;Myh3	Myosin-4;Myosin-7;Myosin-1;Myosin-6;Myosin-8;Myosin-3	1607;2210;655;1608;945;1453;944;141
1179100000	62430000	4927400000	88593000	88441000	2864400000	2909200000	1892700000	1857700000	3460600000	157390000	1695000000	175240000	83834000	3408700000	80389000	0	0	106880000	679860000	3741000000	152620000	147970000	3297400000	2	0	15	1801.87	2.134e-284	368.94	173610000000	338	IEELEEEIEAERASR	Q5SX39;Q5SX40;G3UW82;P13542	Myh4;Myh1;Myh2;Myh8	Myosin-4;Myosin-1;Myosin-8	1607;655;1608;945
789630000	1988400000	2797900000	1807600000	3300000000	2119100000	2135000000	1983000000	1443300000	2110700000	2853900000	1122600000	2493500000	85653000	1131000000	2752200000	543380000	36571000	3252500000	591070000	1954400000	132130000	2974200000	1113800000	1	1	17	1989.93	9.4988e-284	353.38	173120000000	290	DTGTYEDFVEGLRVFDK	P09542	Myl3	Myosin light chain 3	909
0	1865200	22734000	0	13259000	4477800	7819500	1251900	10305000	9220200	6007000	9069600	7990200	101290000	328150000	173020000	159050000	272530000	85663000	470670000	343620000	272220000	91955000	594490000	0	1	9	1082.54	2.6117e-60	241.13	172980000000	218	TDLNHENLK	P07310	Ckm	Creatine kinase M-type	884
870720000	1324700000	3729300000	788170000	1639400000	1934500000	3761700000	1463100000	672940000	2353600000	2082700000	0	0	113220000	2011800000	2056800000	1070900000	1158200000	2291300000	834150000	2385700000	150030000	1861400000	3094200000	0	1	7	829.455	0.0027983	134.81	172680000000	108	LQDLVDK	Q5SX39;Q91Z83;Q5SX40;Q02566;G3UW82;B1AR69;P13542;P13541	Myh4;Myh7;Myh1;Myh6;Myh2;Myh13;Myh8;Myh3	Myosin-4;Myosin-7;Myosin-1;Myosin-6;Myosin-8;Myosin-3	1607;2210;655;1608;945;1453;944;141
22452000	2280200000	36112000	1292300000	3594200000	55037000	160180000	115320000	44178000	0	2695600000	28431000	3528300000	33800000	7100400	2675800000	938210000	73065000	2752100000	175930000	42428000	55014000	3075200000	36849000	1	1	18	2113.99	0	548.56	170730000000	327	KMEGDLNEMEIQLSHANR	Q91Z83;B1AR69	Myh7;Myh13	Myosin-7	2210;141
24848000	2579700000	91126000	2152600000	6901300000	217170000	268860000	211940000	41173000	99608000	4963900000	17890000	6531400000	27156000	33384000	3043200000	1620500000	70483000	4139600000	208110000	0	55963000	4145900000	0	0	1	11	1350.7	3.5114e-21	206.36	170270000000	73	LTYTQQLEDLK	Q91Z83	Myh7	Myosin-7	2210
541490000	55970000	805790000	52137000	20999000	3059400000	2614100000	549120000	90899000	2942000000	116490000	475660000	37344000	19799000	2824700000	12429000	12336000	925810000	26318000	330020000	2714100000	67273000	6404100	3662900000	2	0	7	931.491	9.8758e-21	193.16	168530000000	284	LRMDLER	Q5SX39;G3UW82;P13542	Myh4;Myh2;Myh8	Myosin-4;Myosin-8	1607;655;945
696820000	0	2611200000	0	201650000	3488900000	3858200000	2366100000	1088200	4214300000	0	1187700000	633600000	0	1940400000	0	0	0	65770000	574310000	2513400000	57630000	109390000	2017600000	0	1	8	988.471	0.0013113	134.81	168420000000	128	DEEIDQLK	Q5SX39;Q5SX40;G3UW82;P13542	Myh4;Myh1;Myh2;Myh8	Myosin-4;Myosin-1;Myosin-8	1607;655;1608;945
265360000	17310000	1252900000	0	20583000	2101300000	915100000	371740000	157930000	1911800000	10762000	156680000	95146000	965500	671170000	3891200	8895000	1516000000	7120600	113430000	547330000	13044000	2755600	992670000	0	2	18	1592.9	3.1474e-53	189.52	168170000000	391	KPAAAPAPAPAPAPAPAK	P05977;E0CZ30	Myl1	Myosin light chain 1/3, skeletal muscle isoform	875
0	0	0	0	2088600	24943000	1806700	0	1276000	13283000	0	0	8064300	0	0	0	0	54719000	0	0	0	0	0	0	0	1	9	1044.58	2.7631e-08	159.79	167570000000	119	LINELSTQK	Q5SX39	Myh4	Myosin-4	1607
68575000	57136000	471430000	76158000	768550000	606170000	1650800000	282610000	217130000	519660000	30761000	52218000	782290000	430170000	154860000	111400000	63860000	73792000	113070000	210680000	141820000	230900000	177770000	275870000	1	1	22	2368.2	0	431.73	167520000000	800	RVIISAPSADAPMFVMGVNHEK	P16858;A0A0A0MQF6;S4R1W1;D3YYI5;S4R257	Gapdh;Gm3839;Gm7293	Glyceraldehyde-3-phosphate dehydrogenase	975;2893
175850000	453740000	1607100000	0	1445900000	215940000	2238000000	0	73010000	2315200000	187330000	40585000	1065800000	4696600	706810000	231210000	327370000	1731700000	229990000	261810000	850700000	62000000	556170000	3499400000	0	1	8	997.479	3.5367e-06	172.15	167140000000	206	DLTDYLMK	G3UZ07;Q8BFZ3;P68033;P63260;P60710;E9Q5F4;P62737;P63268;D3YZY0;D3Z2K3;P68134;E9Q1F2	Actg1;Actbl2;Actc1;Actb;Acta2;Actg2;Acta1	Beta-actin-like protein 2;Actin, alpha cardiac muscle 1;Actin, cytoplasmic 2;Actin, cytoplasmic 2, N-terminally processed;Actin, cytoplasmic 1;Actin, cytoplasmic 1, N-terminally processed;Actin, aortic smooth muscle;Actin, gamma-enteric smooth muscle;Actin, alpha skeletal muscle	1367;1364;1310;1354;1255;518;673;1857
0	0	72177000	0	52581000	286910000	8163000	40169000	0	104490000	7177900	23259000	167520000	41370000	65825000	52586000	8407700	44924000	30121000	69730000	60860000	87949000	65257000	125680000	0	2	15	1780.85	0	439.03	167110000000	319	QKYEETQAELEASQK	Q5SX39	Myh4	Myosin-4	1607
13426000	3231100000	22155000	1044300000	5959900000	62996000	245190000	140200000	20037000	11956000	4143900000	21762000	3402300000	0	0	3896800000	453750000	0	1562900000	131190000	0	92930000	3344000000	17892000	1	1	21	2409.14	2.9928e-294	339.42	165430000000	176	VQHELDEAEERADIAESQVNK	Q91Z83;Q02566	Myh7;Myh6	Myosin-7;Myosin-6	2210;1453
1818300000	121110000	4700700000	121020000	145310000	3622800000	5333700000	3474600000	2346400000	5286100000	112640000	2052000000	425830000	253290000	4000800000	88861000	175830000	2512500000	53189000	1977000000	4642200000	174690000	113000000	8227200000	1	0	12	1372.68	1.2627e-70	223.22	164960000000	202	IAEQELLDASER	Q5SX40;G3UW82;P13542	Myh1;Myh2;Myh8	Myosin-1;Myosin-8	655;1608;945
1127500000	48267000	2472600000	42495000	65273000	1542700000	1978100000	853130000	420550000	2255900000	89504000	512820000	426500000	66613000	2359800000	106650000	73257000	349830000	35108000	695690000	2373400000	189960000	137300000	2142400000	2	0	9	1130.59	3.2952e-40	238.01	164030000000	271	EQLAMVERR	Q5SX39;Q5SX40;G3UW82	Myh4;Myh1;Myh2	Myosin-4;Myosin-1	1607;655;1608
55490000	27504000	34780000	81724000	72178000	257620000	444180000	55899000	0	79138000	77467000	48776000	247940000	111150000	144790000	58394000	37540000	27056000	33369000	98350000	104750000	149700000	37978000	197480000	0	2	13	1504.8	1.0773e-38	213.38	163510000000	493	PHPYPALTPEQKK	P05064;D3YWI1;D3Z510	Aldoa	Fructose-bisphosphate aldolase A;Fructose-bisphosphate aldolase	870
0	1714300000	4479100000	0	568310	3754900000	3806500000	0	679690	5251900000	2078900	2003700	0	0	2186100000	3862700000	1906000000	0	4560900000	1635000000	4387900000	211220000	42795000	4176400000	1	1	8	1029.55	2.0188e-05	174.92	162780000000	69	RQLEEEVK	Q91Z83;G3UW82	Myh7;Myh2	Myosin-7	2210;655
14293000	16490000	32354000	8448700	101210000	43006000	84748000	19168000	19630000	20291000	6186700	0	33146000	28631000	0	0	0	96544000	4866900	30856000	60926000	15743000	12962000	278270000	2	0	22	2148.06	0	404.55	162690000000	631	RGTGGVDTAAVGAVFDISNADR	P07310	Ckm	Creatine kinase M-type	884
247160000	521370000	806150000	276110000	1099200000	1950400000	837740000	0	250870000	1624100000	687600000	251130000	1214300000	28133000	896310000	411240000	685680000	2019200000	334280000	342890000	954510000	99153000	439140000	2432300000	1	0	13	1499.7	2.5938e-145	303.7	162640000000	352	QEYDEAGPSIVHR	P68033;P62737;P68134	Actc1;Acta2;Acta1	Actin, alpha cardiac muscle 1;Actin, aortic smooth muscle;Actin, alpha skeletal muscle	1367;1364;1310
1156700000	0	107700000	152230000	0	1785200000	57262000	2826200000	2933800000	57697000	76628000	2877800000	175620000	165440000	0	0	62031000	0	0	0	110560000	0	0	0	0	1	10	1160.59	1.0641e-11	181.44	161280000000	101	TLEDQLSEVK	Q5SX39	Myh4	Myosin-4	1607
128010000	2841600000	449240000	2183900000	6537600000	2068700000	4022600000	1186800000	410460000	825620000	1486100000	527980000	4877800000	290840000	47862000	1373900000	623050000	214470000	3257700000	1681800000	457010000	719340000	4930500000	984640000	0	1	12	1388.74	4.3911e-40	230.06	161240000000	326	NLVHIITHGEEK	P51667	Myl2	Myosin regulatory light chain 2, ventricular/cardiac muscle isoform	1186
0	0	0	0	0	0	0	0	0	0	0	0	0	2281500	1430800000	415250000	87559000	0	87054000	607930000	0	520360000	403180000	19108000	0	1	7	878.424	0.0070899	124.59	157940000000	85	LMVEMEK	P07310	Ckm	Creatine kinase M-type	884
598790000	618350000	831620000	444810000	974800000	815630000	548900000	640150000	472260000	825340000	599900000	535830000	1013400000	27106000	346470000	1371300000	34601000	26919000	2031000000	187390000	1296200000	224570000	980630000	202770000	1	1	29	3451.77	0	409.79	157050000000	840	IWHHTFYNELRVAPEEHPTLLTEAPLNPK	P68033;P68134	Actc1;Acta1	Actin, alpha cardiac muscle 1;Actin, alpha skeletal muscle	1367;1364
762420	0	1675500	0	0	0	0	0	2256900	0	1623800	0	0	2340100	0	0	1690300	0	0	0	0	0	0	4674600	1	0	9	1005.49	5.5271e-10	190.88	156600000000	186	DAMVSQLSR	Q5SX39	Myh4	Myosin-4	1607
11610000	2530900000	91546000	946230000	5030800000	94833000	209530000	177470000	45478000	71956000	1799000000	61896000	5567700000	1383500	5087300	2158600000	1434500000	16519000	1886800000	121700000	12387000	119690000	2729600000	49546000	1	0	15	1692.84	2.6378e-255	350.76	156470000000	301	SPGVMDNPLVMHQLR	Q91Z83	Myh7	Myosin-7	2210
15736000	2315900000	38983000	1332500000	3118200000	0	222520000	0	46271000	0	2855700000	2296100	3297000000	0	0	3264000000	1658200000	158310000	3595900000	221400000	40850000	79798000	3977500000	39289000	0	1	14	1485.73	2.2374e-49	211.75	155930000000	167	LQDAEEAVEAVNAK	Q91Z83;Q02566	Myh7;Myh6	Myosin-7;Myosin-6	2210;1453
0	2811500000	172610000	2274600000	4910300000	0	362960000	0	0	136640000	76771000	0	4231600000	0	0	2894400000	1120200000	99848000	2759300000	147600000	0	106600000	2712500000	0	0	1	18	1849.92	1.9976e-236	334.44	155310000000	146	LLSNLFANYAGADAPADK	Q91Z83	Myh7	Myosin-7	2210
535380000	783330	2510100000	0	47869000	2080000000	1881800000	1376200000	725360000	2052600000	44428000	5804900	204350000	0	996800000	35468000	0	1121600000	26401000	465060000	1249900000	56375000	45832000	1497900000	0	1	13	1431.76	7.275e-58	209.19	153460000000	603	SVMLQIAATELEK	P13412;A2A6J8;A2A6K0	Tnni2	Troponin I, fast skeletal muscle	943
116710000	9736100	1038700000	54978000	22535000	121510000	20226000	99252000	40240000	1057800000	234620000	35789000	18623000	44350000	579740000	49833000	36183000	619070000	9711100	71164000	198420000	7860700	80728000	1430400000	0	2	17	1815.97	2.3863e-64	202.79	152950000000	295	VLNASAIPEGQFIDSKK	Q5SX39;Q5SX40;P13542;P13541	Myh4;Myh1;Myh8;Myh3	Myosin-4;Myosin-1;Myosin-8;Myosin-3	1607;1608;945;944
641390000	35614000	1611800000	0	0	1364000000	1450800000	1103500000	779110000	1544700000	45712000	498780000	119450000	22107000	962600000	17152000	17527000	1300300000	22964000	581650000	1353200000	41002000	28666000	2230000000	1	1	24	2633.25	0	465.72	152400000000	703	ELEEISERLEEAGGATSAQIEMNK	Q5SX39;Q5SX40;G3UW82	Myh4;Myh1;Myh2	Myosin-4;Myosin-1	1607;655;1608
0	0	8169800	0	7953400	21512000	4534700	0	0	13253000	0	2825800	0	0	5042300	2091400	0	12480000	0	3863300	0	0	0	72137000	2	0	12	1535.77	1.0492e-83	252.59	152320000000	175	GYEDWLLSEIRR	O88990	Actn3	Alpha-actinin-3	843
493630000	29483000	1668400000	312650000	1606400000	1082300000	1200900000	851540000	718540000	103620000	949050000	467860000	1145200000	85341000	951990000	330800000	137880000	69302000	584280000	622340000	1803500000	434690000	1121900000	1761000000	0	1	22	2594.16	0	410.58	151000000000	472	AYEDAAEEFHPYIPFFATFDSK	O09165;E9Q489	Casq1	Calsequestrin-1;Calsequestrin	756
3854000	14327000	41620000	0	19605000	123680000	18504000	20029000	9145800	43753000	0	0	108890000	26882000	35728000	16847000	11486000	39076000	15218000	46775000	13920000	13874000	26099000	16525000	0	1	14	1419.68	1.9394e-42	198.14	149720000000	366	AIGAFAAADSFDHK	P32848	Pvalb	Parvalbumin alpha	1079
0	34575000	0	0	0	0	0	0	2231900	0	0	0	0	0	59762000	25479000	13088000	0	19437000	47330000	62105000	47962000	16542000	906970000	0	1	10	961.508	0.00017872	104.43	147980000000	66	TEGGATVTVK	Q5SX39	Myh4	Myosin-4	1607
1694700000	207220000	1662700000	154470000	298370000	6038700000	4448700000	3094700000	2116900000	5024300000	159790000	1653900000	873870000	178680000	2442000000	316710000	99552000	1441500000	143670000	1601100000	3284200000	182530000	229140000	2949700000	1	1	18	2156.99	0	542.74	147970000000	495	KMEGDLNEMEIQLNHSNR	Q5SX40;G3UW82	Myh1;Myh2	Myosin-1	655;1608
964720000	0	3357300000	776410	2055200	4197700000	3221300000	1554100000	1542300000	5346700000	73547000	924080000	7957600	101200000	1601800000	323610	14453000	1512100000	37352000	811620000	2238600000	73121000	7544100	2038300000	2	0	20	2326.21	0	449.59	147830000000	397	ANLLQAEIEELRATLEQTER	Q5SX40;G3UW82;P13542	Myh1;Myh2;Myh8	Myosin-1;Myosin-8	655;1608;945
0	0	0	0	0	0	474380000	0	0	214560000	0	0	274000000	136070000	78810000	73154000	67915000	121740000	45620000	129110000	134800000	142630000	56422000	209600000	0	1	9	1111.53	1.4394e-21	203.55	147330000000	113	HNYYTSISK	O70250	Pgam2	Phosphoglycerate mutase 2	808
8669000	0	1324900000	0	0	1900700000	1346800000	699880000	651660000	1820200000	28074000	371600000	122670000	0	871030000	72085000	49824000	963090000	49429000	295350000	934120000	94817000	90259000	1261400000	0	1	22	2420.1	0	487.06	146860000000	830	AGAEGSSNVFSMFDQTQIQEFK	P97457;F6ULR7	Mylpf	Myosin regulatory light chain 2, skeletal muscle isoform	1425;621
84137000	65779000	103590000	98078000	277980000	335860000	498380000	101670000	155140000	147740000	55408000	66224000	272480000	157070000	83900000	84770000	54011000	37929000	76063000	0	102730000	187900000	94468000	119040000	0	1	15	1368.74	7.3015e-19	164.93	146560000000	249	GAAQNIIPASTGAAK	P16858;A0A0A0MQF6;S4R1W1;S4R257	Gapdh;Gm3839	Glyceraldehyde-3-phosphate dehydrogenase	975;2893
319610000	679310000	7739700	224670000	1444700000	3689900000	3548600000	900730000	477560000	1882100000	664870000	454910000	835170000	8428100	970080000	292100000	488620000	1434700000	196190000	546240000	1050900000	47449000	172610000	2700100000	0	1	10	1128.6	1.8614e-12	175.49	146390000000	153	LDEAEQLALK	Q5SX39;Q5SX40;G3UW82;B1AR69;M0QWL0;P13542;P13541	Myh4;Myh1;Myh2;Myh13;Myh8;Myh3	Myosin-4;Myosin-1;Myosin-8;Myosin-3	1607;655;1608;945;944;141
39324000	1477300000	155280000	1398500000	3477600000	186250000	267670000	277080000	62115000	122240000	2694600000	66599000	2395100000	44296000	42657000	2317600000	1507700000	66045000	4273700000	202610000	87033000	127040000	3451800000	57465000	0	1	12	1318.65	5.9156e-47	238.92	146150000000	258	LTGAIMHFGNMK	Q91Z83	Myh7	Myosin-7	2210
324120000	76590000	1974200000	2081800	61227000	2646500000	2527100000	1317200000	521400000	2569500000	61983000	296230000	257660000	46688000	714050000	62693000	0	563230000	13355000	228600000	143150000	30417000	60884000	630610000	0	1	17	1714.75	2.3116e-162	237.4	144940000000	1373	AAFDMFDADGGGDISVK	P20801	Tnnc2	Troponin C, skeletal muscle	1005
523070000	1245400000	2301200000	1433500000	1841400000	2218800000	2007000000	1987400000	1477800000	2145800000	2547900000	1060200000	2249200000	86624000	1192400000	2603100000	865890000	477030000	2581000000	668950000	1543100000	33109000	2440900000	1912900000	0	2	14	1749.92	1.0558e-100	266.07	144910000000	228	IKIEFTPEQIEEFK	P09542	Myl3	Myosin light chain 3	909
0	0	0	182270000	0	0	590260000	0	289870000	0	0	202610000	0	547050000	0	189490000	4254900	175240000	41961000	0	0	127130000	72415000	0	0	1	14	1331.69	5.8448e-19	146.79	144180000000	186	GILAADESTGSIAK	P05064;A6ZI44;D3YWI1;D3YV98;D3Z510	Aldoa	Fructose-bisphosphate aldolase A;Fructose-bisphosphate aldolase	870
0	3543600	6688300	0	8751000	481510000	0	0	1854000	816270000	15090000	0	834480000	19694000	841640000	1290300000	739410000	355450000	1560000000	246000000	219580000	27237000	1445200000	401580000	0	1	8	923.496	0.003421	142.19	143300000000	301	SLSTELFK	Q5SX39;Q91Z83;Q5SX40;Q02566;P13541	Myh4;Myh7;Myh1;Myh6;Myh3	Myosin-4;Myosin-7;Myosin-1;Myosin-6;Myosin-3	1607;2210;1608;1453;944
74722000	6745500	204340000	5593100	9010100	1734600000	1846200000	199990000	914550000	1798800000	12292000	4488200	131700000	47090000	998960	30845000	0	1173500000	24858000	539530000	1775600000	42795000	37836000	583170000	0	2	19	2390.13	0	406.23	143140000000	494	ELWDTLYQLETDKFEFGEK	A2A6J1;A2A6I8;A2A6H6;Z4YKF8;Z4YKG3;Z4YKG8;Z4YJU0;Z4YNB2;Q9QZ47;Z4YKH8;Z4YKE7;J3QP61;A2A6I3;A2A6J0	Tnnt3	Troponin T, fast skeletal muscle	43;42;41
194970000	0	11949000	75115000	412960000	1320900000	13232000	0	622010000	1570500000	110200000	218830000	445700000	0	574410000	115980000	81592000	296690000	175640000	154560000	696670000	0	123760000	953330000	1	0	9	1108.53	8.3669e-15	181.55	142900000000	146	MNVFNTEVR	Q8R429	Atp2a1	Sarcoplasmic/endoplasmic reticulum calcium ATPase 1	2098
2138400000	99845000	4240600000	77300000	110040000	3259500000	3546800000	3827000000	2045100000	3418000000	59678000	1281200000	360680000	100870000	1299600000	78890000	28679000	734260000	49798000	662490000	2335400000	66547000	63638000	2484100000	0	2	18	2100.06	0	485.95	142820000000	439	IKLEQQVDDLEGSLEQEK	Q5SX40;G3UW82	Myh1;Myh2	Myosin-1	655;1608
0	0	155130000	37115000	195000000	303360000	440100000	0	52379000	78799000	0	0	232360000	30945000	77954000	45437000	22464000	114200000	26814000	0	43553000	43487000	55101000	102920000	0	1	26	2742.33	0	440.99	142190000000	342	DATNVGDEGGFAPNILENNEALELLK	P21550;J3QPZ9	Eno3	Beta-enolase;Enolase	1013
0	1089400000	1167800	412020000	2260500000	4723900	70019000	37630000	18216000	0	1202600000	1240600	2096400000	41125000	36150000	2689500000	379240000	1013700	2214800000	152800000	36376000	65565000	4157000000	48993000	2	0	20	2353.22	0	474.65	142190000000	167	NNLLQAELEELRAVVEQTER	Q91Z83;Q02566	Myh7;Myh6	Myosin-7;Myosin-6	2210;1453
42199000	9969100	163320000	43258000	235430000	225900000	535330000	125910000	131300000	181670000	55864000	43966000	264270000	76695000	121950000	64890000	10858000	73439000	37062000	100670000	126300000	56061000	97281000	0	0	1	30	3006.57	0	456.72	141130000000	651	HIADLAGNPDLVLPVPAFNVINGGSHAGNK	P21550;Q5SX59	Eno3	Beta-enolase;Enolase	1013
0	0	0	0	0	0	0	0	0	0	0	0	0	1266800	2204000	2470900	3970100	20308000	2109100	4943500	2800500	3947600	1615300	5770200	1	0	10	1161.54	2.7166e-16	206.49	140410000000	184	LHTESGEFSR	Q5SX39	Myh4	Myosin-4	1607
0	0	508960000	0	1174500	585810000	493770000	1551500000	952300000	16357000	163280000	0	0	0	1968300000	109540000	0	1155900000	0	6627300	40513000	321210000	138740000	8305300	0	1	7	868.469	0.0010744	140.12	139170000000	266	ILYADFK	Q5SX39;Q5SX40;G3UW82;B1AR69	Myh4;Myh1;Myh2;Myh13	Myosin-4;Myosin-1	1607;655;1608;141
885950000	19986000	4311500000	68177000	82070000	4191400000	9168500000	2765500000	1706200000	4567000000	113970000	2074500000	302230000	146400000	1927300000	138780000	56016000	248500000	98360000	2011800000	5038500000	166360000	107060000	5018700000	1	1	13	1530.75	7.4258e-134	299.66	137030000000	215	VRELEGEVESEQK	G3UW82	Myh2		655
22125000	2466200000	36467000	2004000000	1708800000	121280000	171060000	50542000	15820000	39073000	4564800000	35284000	3348100000	22065000	18662000	993190000	1258200000	107980000	3227900000	64341000	36434000	90661000	2837500000	46328000	0	1	21	2199.12	9.5018e-289	351.66	136480000000	216	GTLEDQIIQANPALEAFGNAK	Q91Z83;Q02566;B8JJH5	Myh7;Myh6	Myosin-7;Myosin-6	2210;1453
0	0	0	0	0	0	0	0	0	0	0	0	0	0	2203600000	2150200000	1978900000	656850000	2013700000	1132500000	2219900000	0	2068700000	4404200000	0	1	8	961.46	0.0048744	99.442	135650000000	40	LTEDEVEK	P09542	Myl3	Myosin light chain 3	909
10308000	2499700000	36654000	670270000	3972100000	293980000	314750000	593970	9639300	60461000	3049600000	0	3495800000	8101500	9349400	1787200000	1065200000	9448300	2227700000	286620000	41153000	38673000	2645800000	37733000	0	1	15	1721.94	0	378.79	135630000000	201	VQLLHSQNTSLINQK	Q91Z83;Q02566	Myh7;Myh6	Myosin-7;Myosin-6	2210;1453
3015700	0	11007000	0	14391000	109070000	2981100	2412100	490740	1096600	2927200	24921000	46866000	766660	1138400	69474000	8583000	4888400	47155000	29589000	45473000	3224400	44605000	170850000	1	1	13	1423.72	6.803e-194	316.34	135420000000	230	PRHQGVMVGMGQK	G3UZ07;E9Q606;Q8BFZ3;P68033;P63260;G3UYG0;P60710;E9Q5F4;E9Q2D1;P62737;P63268;D3YZY0;D3Z2K3;P68134	Actg1;Actb;Actbl2;Actc1;Acta2;Actg2;Acta1	Beta-actin-like protein 2;Actin, alpha cardiac muscle 1;Actin, cytoplasmic 2;Actin, cytoplasmic 2, N-terminally processed;Actin, cytoplasmic 1;Actin, cytoplasmic 1, N-terminally processed;Actin, aortic smooth muscle;Actin, gamma-enteric smooth muscle;Actin, alpha skeletal muscle	1367;1364;1310;1354;1255;673;1857
1136400000	7104600	3223400000	3933900	186530000	156680000	219480000	1048400000	50804000	141030000	236320000	607350000	491870000	88579000	1552200000	212860000	82769000	3358400000	170040000	485050000	300750000	141380000	364260000	39245000	0	1	18	1986.98	6.0631e-118	268.82	134970000000	498	EASGPINFTVFLTMFGEK	P97457	Mylpf	Myosin regulatory light chain 2, skeletal muscle isoform	1425
1526300000	2760600	3871700000	22456000	8170800	3834500000	2963600000	2534400000	236280000	5426200000	12576000	1375300000	112320000	74318000	2969600000	82317000	94867000	2141100000	112060000	1375700000	4325600000	263910000	95939000	3533000000	0	2	15	1789.85	0	412.54	134930000000	386	QKYEETHAELEASQK	Q5SX40;G3UW82	Myh1;Myh2	Myosin-1	655;1608
251620000	58202000	1752600000	56057000	67539000	1684000000	1390100000	1081400000	572510000	1842100000	77260000	10203000	133210000	61831000	656170000	71351000	26445000	652950000	45804000	319360000	1042100000	32028000	68967000	795230000	0	1	12	1445.67	1.0761e-38	222.72	133860000000	436	SYLSEEMIAEFK	P20801	Tnnc2	Troponin C, skeletal muscle	1005
45110000	118550000	6188200000	96389000	144070000	5303700000	4148800000	4006200000	2161800000	5150100000	5280500	118000000	418650000	163350000	2549700000	79254000	0	1610700000	80722000	1396400000	3492700000	159000000	81646000	3426500000	0	1	15	1633.79	5.0373e-70	244.05	132990000000	384	NLTEEMAGLDETIAK	Q5SX40;G3UW82	Myh1;Myh2	Myosin-1	655;1608
351730000	152570000	1550500000	181480000	665370000	1455300000	1470800000	195690000	939810000	1698300000	213440000	458220000	805520000	94073000	1149400000	231180000	111810000	474890000	326610000	331490000	1363500000	54043000	223440000	1808100000	0	2	16	1502.81	1.5345e-90	248.01	132150000000	333	KAEIGIAMGSGTAVAK	Q8R429;B1ATS4;B1ATS5;E9Q559;Q64518	Atp2a1;Atp2a3	Sarcoplasmic/endoplasmic reticulum calcium ATPase 1;Calcium-transporting ATPase;Sarcoplasmic/endoplasmic reticulum calcium ATPase 3	2098;148
0	0	489570000	0	0	655220000	9647600	0	1615000	0	16364000	0	584310000	102230000	28243000	62514000	98282000	152000000	35618000	101010000	162050000	72603000	126190000	851200000	1	0	7	906.481	1.7231e-05	153.73	132050000000	221	FEEILTR	P07310	Ckm	Creatine kinase M-type	884
677950	168670000	284050000	95205000	296960000	664470000	0	0	0	0	297970	609420000	2060900000	49737000	1239200000	817360000	1218000000	705140000	1311600000	896660000	1428400000	533750000	920090000	5901600000	1	1	12	1353.62	1.9532e-106	274.84	131100000000	256	DSYVGDEAQSKR	G3UZ07;E9Q606;V9GXQ2;P68033;P63260;G3UYG0;P60710;E9Q5F4;P62737;P63268;D3YZY0;D3Z2K3;P68134	Actg1;Actb;Gm17087;Actc1;Acta2;Actg2;Acta1	Actin, alpha cardiac muscle 1;Actin, cytoplasmic 2;Actin, cytoplasmic 2, N-terminally processed;Actin, cytoplasmic 1;Actin, cytoplasmic 1, N-terminally processed;Actin, aortic smooth muscle;Actin, gamma-enteric smooth muscle;Actin, alpha skeletal muscle	1367;1364;1310;1354;1255;673
2986200	2315700000	44554000	1532600000	3907800000	79508000	203550000	167340000	0	42678000	3186500000	0	3282600000	33127000	19238000	1789300000	668200000	76741000	2005000000	127190000	5646400	39707000	2015200000	26048000	0	1	18	1960.96	0	385.12	130880000000	234	NLQEEISDLTEQLGSTGK	Q91Z83	Myh7	Myosin-7	2210
11525000	104800000	1984300000	64528000	98299000	1239600000	1242700000	1801500000	1285300000	1508900000	158120000	889810000	156770000	105270000	1010500000	62534000	20344000	570830000	89564000	376580000	1485900000	106800000	66454000	1907800000	2	1	21	2385.24	3.0181e-98	219.22	129960000000	596	LVIIESDLERAEERAELSEGK	F8WID5;G5E8R1;E9Q455;Q8BSH3;B7ZNL3;P58771	Tpm1	Tropomyosin alpha-1 chain	646;1921;1242;177
0	611000000	0	1386100000	3298300000	29621000	0	5484800	5630300	33180000	2930500000	22618000	2021700000	16866000	9598900	2359700000	1119500000	140640000	2913300000	13541000	37162000	76367000	3439000000	42934000	1	1	15	1728.83	9.1495e-216	331.48	128360000000	117	ENVLDRAEQAEAEQK	E9Q5J9;Q8K0Z5;P21107	Tpm3	Tropomyosin alpha-3 chain	1007;541
1765000000	97920000	8110100000	5804300	123620000	5882200000	7043300000	14366000	29006000	7158700000	2185900	30358000	522670000	2242000	2011200000	110390000	78814000	116970000	93026000	1184400000	4377200000	193350000	131820000	4454600000	0	1	13	1518.72	1.8931e-56	237.59	127670000000	183	LAQESIMDIENEK	G3UW82	Myh2		655
69069000	4299900000	118610000	934320000	5215300000	1163500000	1782400000	428260000	185440000	127700000	3663900000	259770000	2064100000	104910000	227770000	7457000000	582040000	95967000	5587100000	107930000	181670000	277050000	2613100000	118980000	0	1	13	1503.77	1.5353e-48	227.92	126510000000	212	NLVHIITHGEEKD	P51667	Myl2	Myosin regulatory light chain 2, ventricular/cardiac muscle isoform	1186
4539600	7173600	206830000	0	243090000	418710000	621070000	0	0	261140000	51861000	42465000	294310000	0	99647000	55147000	32278000	136350000	32626000	73976000	105920000	34093000	75295000	96904000	0	1	17	1867.96	1.2165e-78	222.64	125610000000	741	LAMQEFMILPVGASSFK	P21550;Q5SX59	Eno3	Beta-enolase;Enolase	1013
15702000	1715500000	71639000	1667600000	4312500000	124190000	211700000	79019000	43839000	36643000	3305000000	42590000	2440800000	66549000	32250000	2654800000	944360000	0	3018800000	144370000	27639000	66958000	3052100000	47623000	1	1	17	1928.94	3.8201e-213	319.67	125390000000	351	DTQIQLDDAVRANDDLK	Q91Z83	Myh7	Myosin-7	2210
0	4402900	0	385520	0	0	0	0	0	1765200	1860100	1130400	0	0	541660000	233170000	153410000	190340000	340270000	186450000	640750000	61552000	210020000	784040000	1	0	9	1032.5	0.00031002	134.66	124930000000	221	HTDPVPDPR	Q8R429;O55143;J3KMM5	Atp2a1;Atp2a2	Sarcoplasmic/endoplasmic reticulum calcium ATPase 1;Sarcoplasmic/endoplasmic reticulum calcium ATPase 2;Calcium-transporting ATPase	2098;803
0	0	121910000	19277000	0	48252000	198130000	0	45150000	0	0	15390000	0	0	121490000	65025000	102560000	45161000	62670000	175240000	217070000	148150000	88817000	429290000	0	1	8	982.462	9.7924e-07	179.17	124640000000	188	GIWHNDNK	P07310;Q04447	Ckm;Ckb	Creatine kinase M-type;Creatine kinase B-type	884;1458
901440	1588900000	0	925600000	2425100000	76419000	88077000	51713000	2230800	49674000	1667100000	0	2277900000	22495000	24905000	3453500000	2098400000	89876000	3863800000	173190000	40782000	93612000	241640000	33154000	0	2	15	1798.82	0	449.63	124270000000	129	QKYEESQSELESSQK	Q91Z83;Q02566	Myh7;Myh6	Myosin-7;Myosin-6	2210;1453
0	515130	0	0	32561000	0	0	172720	0	0	26050000	0	0	56666000	2322600000	414270000	91788000	446280000	232590000	622200	259280000	150850000	61525000	2653700000	1	2	8	957.561	2.5975e-08	174.02	124080000000	129	RKLEGDLK	A2AQP0;Q5SX39;Q91Z83;Q5SX40;Q02566;B8JJH5;G3UW82;B1AR69;P13542;P13541	Myh7b;Myh4;Myh7;Myh1;Myh6;Myh2;Myh13;Myh8;Myh3	Myosin-7B;Myosin-4;Myosin-7;Myosin-1;Myosin-6;Myosin-8;Myosin-3	1607;2210;655;1608;945;1453;944;141;97
356730000	0	1618200	53414000	1315700	0	1785900000	0	0	0	40052000	0	0	116890000	1358600000	46236000	10903000	1491100000	6992300	578370000	1556800000	62315000	62215000	2709400000	1	0	8	974.486	5.6429e-06	185.58	123760000000	119	EQLAMVER	Q5SX39;Q5SX40;G3UW82	Myh4;Myh1;Myh2	Myosin-4;Myosin-1	1607;655;1608
803610	560590	17434000	2325200	11157000	25141000	8361700	8045100	0	10756000	31697000	1598800	29870000	13186000	13985000	10280000	7172700	62703000	7607300	0	13401000	19540000	13748000	593170000	1	1	19	2189.03	3.5728e-252	332.41	123630000000	1690	ELTERAEDEEEINAELTAK	Q5SX39	Myh4	Myosin-4	1607
452650000	975530	563530000	3008400	955280000	1966900000	669820000	3815800	963780000	1208000000	498560000	2545800	1580300000	454830000	530430000	489720000	418790000	950220000	241870000	4417700	25100000	563100000	598250000	754160000	1	0	13	1608.78	1.4608e-48	225.23	123610000000	570	DVFLGTFLYEYSR	P07724	Alb	Serum albumin	886
695270000	1521400000	2232500000	703690000	2061500000	1800500000	1920400000	1698300000	1174000000	2131600000	1860900000	837580000	1969000000	27639000	1014000000	1970900000	317190000	143570000	1960200000	515560000	1503900000	39047000	2187500000	1074100000	1	1	11	1335.72	2.3862e-63	244.71	123390000000	207	EAFLLFDRTPK	P09542	Myl3	Myosin light chain 3	909
21527000	69817000	44587000	1537600000	2045500000	99825000	183840000	179500000	48168000	45347000	3549900000	0	2155400000	42328000	28580000	3016700000	1096500000	53678000	2872200000	174230000	83589000	63371000	2958600000	145250000	1	0	14	1564.74	2.2674e-79	245.03	122950000000	365	MVDSLQTSLDAETR	Q91Z83;Q02566	Myh7;Myh6	Myosin-7;Myosin-6	2210;1453
0	2319000000	182140000	1349400000	3932100000	106320000	200560000	213020000	0	26564000	3000400000	10608000	2533300000	0	30295000	2578300000	1915700000	125390000	3412500000	207660000	47283000	70561000	2855500000	16470000	0	2	13	1565.76	1.3374e-19	168.89	122820000000	128	DVFVPDDKEEFVK	Q91Z83;B8JJH1	Myh7	Myosin-7	2210
0	0	0	27552000	0	0	931300000	0	2014100	0	0	2448500	560200000	42792000	760140000	286460000	238430000	327120000	423390000	309230000	947720000	0	395410000	1337000000	0	1	9	989.522	8.8845e-16	215.39	122160000000	175	VIMITGDNK	Q8R429;O55143;J3KMM5	Atp2a1;Atp2a2	Sarcoplasmic/endoplasmic reticulum calcium ATPase 1;Sarcoplasmic/endoplasmic reticulum calcium ATPase 2;Calcium-transporting ATPase	2098;803
51227000	342710000	1079700000	191100000	1068400000	1076600000	1092500000	642760000	330340000	1327600000	445970000	193310000	1045200000	85756000	288640000	360480000	135380000	302960000	252340000	133170000	435990000	52690000	207240000	325800000	0	1	23	2535.15	0	355.45	120270000000	1793	LCYVALDFENEMATAASSSSLEK	P68033;P62737;P63268;D3YZY0;P68134	Actc1;Acta2;Actg2;Acta1	Actin, alpha cardiac muscle 1;Actin, aortic smooth muscle;Actin, gamma-enteric smooth muscle;Actin, alpha skeletal muscle	1367;1364;1310
34076000	0	1845200000	125070000	551770000	2469000000	1437700000	196140000	448100000	1583300000	214110000	277460000	535610000	0	1113700000	92021000	14225000	0	164180000	250740000	1314000000	34546000	103560000	362750000	1	1	13	1323.79	2.0036e-28	186.94	119120000000	298	VGTTRVPLTGPVK	Q8R429	Atp2a1	Sarcoplasmic/endoplasmic reticulum calcium ATPase 1	2098
14958000	1687600000	61547000	71628000	2726800000	71667000	118590000	120220000	3737800	24231000	2435700000	3804800	3495000000	25660000	21995000	1961900000	1032100000	0	2568300000	132570000	56411000	95636000	3022000000	47787000	1	1	17	1868.02	2.8479e-64	201.57	118660000000	190	ILNPAAIPEGQFIDSRK	Q91Z83;Q02566;B8JJH5	Myh7;Myh6	Myosin-7;Myosin-6	2210;1453
1246300000	104220000	4526500000	143950000	133210000	3768700000	4745200000	3369500000	1957000000	4033400000	134270000	2126500000	431160000	106720000	1303200000	88162000	56488000	102680000	105320000	1297100000	3954900000	715120000	144450000	3171300000	0	1	16	1703.87	3.6311e-29	183.23	117790000000	199	VLNASAIPEGQYIDSK	G3UW82	Myh2		655
0	0	124900000	16074000	185720000	183080000	195100000	0	0	182380000	14936000	36625000	118280000	132690000	37656000	32097000	22560000	0	24680000	119340000	41269000	70117000	10145000	86053000	1	1	12	1287.67	1.197e-61	248.13	117080000000	212	RALANSLACQGK	P05064;A6ZI44;Q9CPQ9;A6ZI46	Aldoa;Aldoart1	Fructose-bisphosphate aldolase A;Fructose-bisphosphate aldolase	870
0	2576400000	96119000	2178800000	26266000	138290000	234050000	199870000	47963000	68624000	4088000000	69665000	4184100000	50545000	35605000	234930000	12764000	93597000	290650000	184350000	63762000	106630000	398960000	45861000	1	1	17	1735.87	1.0527e-266	296.14	116510000000	328	ADAEMAAFGAAAPFLRK	Q91Z83;B8JJH1	Myh7	Myosin-7	2210
386710000	563960000	852830000	330900000	1352900000	1063100000	963160000	469870000	480560000	884560000	768180000	482760000	241890000	654990	307360000	693120000	249490000	60582000	780890000	132180000	898810000	52856000	1040600000	1228200000	1	1	18	2022.01	0	416.81	116050000000	516	KHADSVAELGEQIDNLQR	Q5SX39;Q91Z83;Q5SX40;Q02566;G3UW82;P13542	Myh4;Myh7;Myh1;Myh6;Myh2;Myh8	Myosin-4;Myosin-7;Myosin-1;Myosin-6;Myosin-8	1607;2210;655;1608;945;1453
804370000	112830000	2868500000	155880000	172150000	2808700000	3008600000	3128000000	1555100000	6087800000	200220000	531820000	534440000	91888000	1557400000	76644000	47726000	2596800000	93877000	490190000	2234000000	358760000	133910000	1032600000	1	1	14	1558.8	2.1237e-40	220.97	115990000000	396	AGLLGLLEEMRDDK	Q5SX40;G3UW82	Myh1;Myh2	Myosin-1	655;1608
24125000	1344100000	222960000	1502200000	2902600000	185090000	367680000	27391000	38812000	154460000	2530400000	0	2468500000	43158000	20527000	1992500000	812230000	31105000	2212900000	181100000	106810000	67217000	2445200000	15709000	0	1	13	1514.77	1.1223e-166	309.45	115560000000	162	LLGSLDIDHNQYK	Q91Z83;Q02566;B8JJH5	Myh7;Myh6	Myosin-7;Myosin-6	2210;1453
44518000	784160000	1854800000	573180000	3639400000	1376300000	1829300000	2457000000	574160000	1421600000	1811400000	448530000	2527100000	38628000	562980000	1484000000	162440000	0	1718400000	255220000	953190000	140280000	1802400000	362370000	1	1	17	1938.01	3.4408e-158	289.5	115190000000	403	HVLATLGERLTEDEVEK	P09542	Myl3	Myosin light chain 3	909
29796000	25685000	30603000	97623000	0	950880000	38207000	0	82619000	4475800000	209850000	0	0	1253100	5898800	117700000	18270000	558590000	107150000	471550000	2096900000	1660100000	48102000	0	1	0	7	813.507	1.2172e-05	158.03	114560000000	109	LAQLITR	Q5SX39;Q5SX40;G3UW82	Myh4;Myh1;Myh2	Myosin-4;Myosin-1	1607;655;1608
906340000	111260000	3610000000	23741000	95135000	7344400000	3047400000	2194200000	1395700000	2330000000	84145000	1570200000	198510000	33618000	1686000000	149290000	69960000	317320000	169520000	1263100000	4644700000	888470000	136760000	2446700000	2	1	13	1572.8	9.9357e-47	220.97	113460000000	187	ERIEAQNRPFDAK	G3UW82	Myh2		655
11827000	2030800000	52059000	851990000	3844200000	101860000	152070000	68399000	10608000	52987000	2501200000	19619000	3717800000	24496000	0	2037600000	448290000	0	2243500000	49201000	84986000	62371000	990600000	49990000	1	1	17	1886.96	0	368.44	113450000000	193	GSSFQTVSALHRENLNK	Q91Z83;Q02566;B8JJH5	Myh7;Myh6	Myosin-7;Myosin-6	2210;1453
773710000	0	2577800000	0	123360000	3837800000	2891600000	2702100000	1376800000	4695700000	85397000	816580000	387030000	67914000	3209300000	121320000	92506000	3009100000	71374000	1676000000	4425400000	227320000	0	4678300000	0	1	13	1533.69	1.5702e-172	322.81	113370000000	248	YEETHAELEASQK	Q5SX40;G3UW82	Myh1;Myh2	Myosin-1	655;1608
0	0	9740600	1180700	6960800	13935000	3888200	6668800	15378000	11890000	664750	4380700	31219000	0	5052400	5398900	3533900	7070900	3886800	8838100	0	11073000	6226000	53229000	3	0	21	2486.25	0	396.96	112600000000	412	RANLMQAEIEELRASLEQTER	Q5SX39	Myh4	Myosin-4	1607
0	0	37968000	0	44020000	24036000	30638000	44151000	53185000	0	47337000	53438000	157530000	0	41589000	0	0	65122000	0	0	3990600	87312000	0	582540000	0	1	13	1524.69	4.7561e-77	258.02	112500000000	171	YEETQAELEASQK	Q5SX39	Myh4	Myosin-4	1607
11913000	1554000000	30124000	1148100000	2879900000	56644000	150850000	86830000	17374000	17649000	2421200000	0	2632400000	0	0	1983600000	1067700000	0	2260700000	87466000	19202000	49219000	2035800000	0	1	0	9	1029.58	3.5467e-10	189.38	112320000000	49	EALISQLTR	Q91Z83;Q02566	Myh7;Myh6	Myosin-7;Myosin-6	2210;1453
16166000	2117600000	28986000	799590	5214000	124150000	0	0	0	0	0	22745000	0	30166000	29470000	3850400000	2386400000	124910000	3973900000	270330000	43751000	111470000	3905500000	62901000	1	0	10	1145.57	4.5052e-12	187.97	112300000000	33	LQTENGELSR	Q91Z83	Myh7	Myosin-7	2210
1039600	1023000	7914600	0	2723400	4529000	0	1636500	0	0	12723000	0	4932300	0	1378700	0	0	44140000	0	1130100	0	1510200	0	249100000	0	1	24	2718.34	0	415.12	112210000000	900	AEAHFSLVHYAGTVDYNIIGWLDK	Q5SX39	Myh4	Myosin-4	1607
1309400	1480600000	1148400000	801860000	2636900000	47403000	709560000	32356000	15093000	860590000	1673300000	39219000	2277800000	120060000	77211000	2010800000	571780000	387880000	2841800000	432240000	1030000000	219060000	2873000000	1083400000	1	1	19	2266.99	1.94e-192	303.79	111700000000	1043	EMTERLEDEEEMNAELTAK	Q91Z83;Q02566;B8JJH5	Myh7;Myh6	Myosin-7;Myosin-6	2210;1453
0	1306600	0	0	0	58610000	0	43061000	104270000	352500000	33737000	28757000	64220000	40406000	751840000	0	0	864520000	0	0	219560000	9964000	35764000	521110000	0	1	9	950.507	0.00020201	139.02	111490000000	150	SSVFVVDAK	Q5SX39;Q5SX40;Q1WNQ6	Myh4;Myh1	Myosin-4;Myosin-1	1607;1608
0	50626000	840090000	13405000	23114000	1752800000	336690000	0	0	518160000	128470000	0	112030000	0	1147700000	0	7582900	243520000	103700000	729150000	1579200000	182990000	31743000	219630000	1	1	8	977.566	1.1824e-13	186.67	110340000000	206	SRVTFQLK	Q5SX39;Q5SX40;G3UW82;P13542;P13541	Myh4;Myh1;Myh2;Myh8;Myh3	Myosin-4;Myosin-1;Myosin-8;Myosin-3	1607;655;1608;945;944
70728000	8203300	464090000	4167500	8710000	57413000	12716000	18068000	20817000	636940000	25295000	0	54232000	0	404330000	3885300	5425400	509260000	5624000	13657000	51241000	0	17330000	483100000	0	1	12	1529.73	1.3114e-231	347.75	109940000000	388	SYHIFYQIMSNK	Q5SX39;Q5SX40;B1AR69	Myh4;Myh1;Myh13	Myosin-4;Myosin-1	1607;1608;141
23792000	2055400000	69640000	445920000	2640600000	79341000	154520000	56823000	23532000	70209000	639860000	33011000	2340900000	33114000	26700000	1479900000	912430000	14410000	2545900000	130620000	44975000	68621000	2687300000	0	0	2	18	2086.04	0	477.87	109720000000	184	VKLEQQVDDLEGSLEQEK	Q91Z83;Q02566;B8JJH5	Myh7;Myh6	Myosin-7;Myosin-6	2210;1453
0	0	0	0	0	0	0	0	0	0	0	0	0	0	94824000	55691000	80750000	113020000	30793000	111490000	0	120320000	24806000	335880000	1	0	8	939.477	8.3042e-30	209.37	108700000000	165	ELSDIAHR	P05064;A6ZI44;D3YWI1;Q9CPQ9;A6ZI46;D3YV98;D3Z510	Aldoa;Aldoart1	Fructose-bisphosphate aldolase A;Fructose-bisphosphate aldolase	870
30162000	2083700000	4461500	1706500000	5206400000	257950000	340190000	13967000	6341500	203010000	3868500000	6667100	4871400000	12354000	60544000	423660000	62262000	111920000	523890000	36216000	17046000	12492000	1085900000	0	0	1	20	2347.2	1.0849e-226	335.41	108570000000	328	IEDMAMLTFLHEPAVLYNLK	Q91Z83;Q02566;B8JJH5	Myh7;Myh6	Myosin-7;Myosin-6	2210;1453
34635000	57622000	209770000	35089000	295520000	224160000	385720000	150160000	159810000	178670000	93095000	53967000	274920000	49215000	160430000	94761000	35144000	53292000	64397000	75000000	191870000	57838000	168210000	292130000	1	0	14	1540.76	2.3187e-125	293.8	108310000000	357	LAQSNGWGVMVSHR	P21550;J3QPZ9;P17182;Q6PHC1	Eno3;Eno1	Beta-enolase;Enolase;Alpha-enolase	1013;978
826570000	104100000	3332000000	86120000	159320000	2660900000	3232000000	1708000000	1187800000	2642900000	0	885310000	273210000	64213000	1285100000	90570000	56860000	709380000	72577000	658660000	1837600000	155900000	127250000	2384800000	0	1	11	1300.69	2.4425e-64	250.51	107850000000	110	QLEDELVSLQK	Q8BSH3;P58771;Q8BP43	Tpm1	Tropomyosin alpha-1 chain	1921;1242
0	0	1393900000	0	0	0	0	0	0	1634300000	0	0	0	20013000	1266000000	41932000	18697000	162730000	19226000	563120	1104400000	79360000	15484000	1504600000	0	1	8	958.508	5.5119e-14	199.02	107780000000	56	INQQLDTK	Q5SX39;Q5SX40;G3UW82;B1AR69;P13542;P13541	Myh4;Myh1;Myh2;Myh13;Myh8;Myh3	Myosin-4;Myosin-1;Myosin-8;Myosin-3	1607;655;1608;945;944;141
748210000	1058700000	844940000	588400000	563630000	696200000	915070000	519000000	575890000	876670000	628770000	603830000	651200000	414480000	757960000	543160000	451240000	431150000	760630000	799660000	769310000	1022000000	878620000	1317900000	0	0	12	1419.71	1.9001e-25	181.31	107580000000	216	YVNWIQQTIAAN	Q9CPN9	2210010C04Rik		2318
895080	363980	14477000	222050000	2198800000	1297200000	2500300000	0	967340	1628500000	0	184950000	1625200000	0	1694300000	931290000	240710000	653740000	1212800000	819040000	671880000	504030000	759110000	1908500000	0	1	10	1135.67	3.3156e-20	190.57	107300000000	246	LLLQVQHASK	P51881;P48962	Slc25a5;Slc25a4	ADP/ATP translocase 2;ADP/ATP translocase 2, N-terminally processed;ADP/ATP translocase 1	1158;1191
21426000	2096000000	0	1411600000	3013500000	97002000	138090000	2347600	37739000	0	2443200000	0	2629500000	0	26347000	1901300000	926490000	66903000	2316700000	114430000	61163000	77484000	1458000000	39521000	0	1	14	1494.78	1.3158e-31	195.78	106470000000	126	SAYLMGLNSADLLK	Q91Z83;Q02566;B8JJH5	Myh7;Myh6	Myosin-7;Myosin-6	2210;1453
12291000	1529600000	24492000	692260000	1581500000	80122000	107570000	70361000	32666000	37674000	1396700000	89116000	1743800000	100210000	16021000	3247600000	1126500000	33226000	1262300000	112880000	13209000	25858000	1736800000	44270000	0	1	13	1457.74	3.4161e-118	289.38	105520000000	141	IEDEQALGSQLQK	Q91Z83	Myh7	Myosin-7	2210
0	0	1372500	0	0	0	1030000	0	0	1551800	0	0	0	0	2415000	0	1572900	0	7246300	22721000	13314000	28217000	697640	80390000	0	1	7	904.477	1.7231e-05	153.73	105430000000	175	HIHELEK	Q5SX39;P13542	Myh4;Myh8	Myosin-4;Myosin-8	1607;945
149520000	12108000	655830000	21907000	49584000	894460000	903870000	608360000	399380000	564190000	15383000	442590000	32877000	0	440300000	19618000	25611000	165860000	18771000	288770000	900360000	46126000	15458000	1206700000	0	2	16	1837.04	0	378.64	105200000000	395	VQLLHTQNTSLINTKK	Q5SX39;Q5SX40;G3UW82;P13542	Myh4;Myh1;Myh2;Myh8	Myosin-4;Myosin-1;Myosin-8	1607;655;1608;945
16944000	1414600000	48784000	961890000	3578800000	84563000	124170000	99704000	37414000	45177000	2437600000	0	5300200000	32704000	34730000	1752200000	873280000	26813000	1643500000	149880000	36060000	45556000	2190400000	62312000	0	1	14	1708.79	1.5611e-106	279.18	104520000000	169	NAYEESLEHLETFK	Q91Z83;Q02566	Myh7;Myh6	Myosin-7;Myosin-6	2210;1453
5407000	1526000000	72931000	1466000000	2896500000	106600000	158440000	0	0	0	3096000000	0	2473500000	38746000	35067000	2481600000	707830000	52779000	2796100000	184150000	43915000	54512000	2951500000	67821000	1	1	12	1400.75	1.9025e-38	223.46	104300000000	152	RDIDDLELTLAK	Q91Z83	Myh7	Myosin-7	2210
15405000	1805200000	47156000	1073400000	3112300000	74679000	127610000	97375000	33923000	49591000	2273800000	30775000	2029000000	36835000	32877000	1656600000	1072300000	51303000	1879100000	135980000	39122000	48969000	2278800000	55986000	1	0	10	1161.58	2.7175e-20	191.45	104200000000	78	DFELNALNAR	Q91Z83	Myh7	Myosin-7	2210
1237400000	0	2805600000	184880000	63216000	2436700000	1852300000	3149400000	1847200000	1685700000	0	1419900000	399580000	89511000	1655000000	136540000	16962000	48298000	91543000	700190000	2888700000	220850000	154270000	2211600000	1	1	27	3063.62	0	436.41	104130000000	264	IAEQELLDASERVQLLHTQNTSLINTK	Q5SX40;G3UW82;P13542	Myh1;Myh2;Myh8	Myosin-1;Myosin-8	655;1608;945
0	635050000	23006000	573020000	1087300000	23928000	42564000	41440000	0	19514000	1173600000	0	1038400000	15805000	33701000	3289200000	1861800000	4081900	4316200000	95518000	48616000	164280000	1689400000	33804000	0	1	8	958.487	6.3864e-06	163.2	104080000000	72	LYDNHLGK	Q91Z83;Q02566;B8JJH5	Myh7;Myh6	Myosin-7;Myosin-6	2210;1453
0	0	5306100	0	0	0	7774100	0	0	6856600	0	0	448240000	0	0	0	58357000	41034000	0	0	0	1693700000	0	0	0	1	9	976.523	0.0005781	123.6	104010000000	22	TSVFVAEPK	G3UW82;P13542;Q8BGE8	Myh2;Myh8	Myosin-8	655;945
0	0	0	0	0	0	0	0	0	0	0	0	0	0	0	0	0	0	0	0	0	0	0	0	0	1	7	718.401	0.081025	62.978	101360000000	1	FPGASLK	Q8BU30	Iars	Isoleucine--tRNA ligase, cytoplasmic	1927
285540000	3495200000	1212400000	607700000	2385400000	1943600000	1782100000	727260000	436360000	1686000000	1670900000	285770000	2044800000	20189000	743110000	457510000	1077000000	793780000	490600000	275730000	412240000	49421000	765150000	2037900000	1	0	9	994.556	1.4405e-49	228.05	101230000000	76	HVLATLGER	P09542	Myl3	Myosin light chain 3	909
0	9074300	1912100000	0	74909000	1900900000	2452300000	459950000	244500000	1516300000	0	123630000	230530000	50644000	79560000	0	0	557690000	27249000	286320000	888570000	46480000	0	1303300000	0	1	8	978.466	0.00089036	138.78	100270000000	123	VDFDDIQK	A2A6J1;A2A6I8;A2A6H6;Z4YKF8;Z4YKG3;Z4YKG8;Z4YJU0;Z4YNB2;Q9QZ47;Z4YKH8;Z4YKE7;J3QP61;A2A6I3;A2A6J0	Tnnt3	Troponin T, fast skeletal muscle	43;42;41
321110000	34693000	1917300000	190930000	357700000	176390000	107910000	882110000	188670000	842140000	551290000	91289000	272470000	0	38532000	1491800000	7207900	10612000	2287100000	5630300	953980000	89929000	749600000	7213200	3	0	21	2155.13	8.4056e-211	297.4	100230000000	335	AGFAGDDAPRAVFPSIVGRPR	G3UZ07;E9Q606;F6WX90;P68033;P63260;B1ATY1;G3UYG0;P60710;E9Q5F4;E9Q2D1;P62737;P63268;D3YZY0;D3Z2K3;P68134;E9Q1F2	Actg1;Actb;Actc1;Acta2;Actg2;Acta1	Actin, alpha cardiac muscle 1;Actin, cytoplasmic 2;Actin, cytoplasmic 2, N-terminally processed;Actin, cytoplasmic 1;Actin, cytoplasmic 1, N-terminally processed;Actin, aortic smooth muscle;Actin, gamma-enteric smooth muscle;Actin, alpha skeletal muscle	1367;1364;1310;1354;1255;518;673
7524900	1280900	82919000	0	125180000	126250000	282040000	8687300	114760000	62912000	43500000	3242900	217870000	119900000	65416000	50939000	44686000	82556000	21732000	106190000	105270000	91898000	71807000	130710000	0	0	22	2257.03	1.1837e-295	343.19	99983000000	533	YTPSGQSGAAASESLFISNHAY	P05064;A6ZI44	Aldoa	Fructose-bisphosphate aldolase A;Fructose-bisphosphate aldolase	870
221900000	440890000	1473500000	256180000	776770000	874330000	1827400000	370570000	172900000	1121600000	683690000	160030000	1123900000	79726000	945550000	558760000	35270000	24885000	792070000	539650000	1323400000	307740000	241150000	1555700000	1	1	12	1357.74	6.9942e-37	224.43	99930000000	302	ISVREPMQTGIK	Q03265;D3Z6F5	Atp5a1	ATP synthase subunit alpha, mitochondrial;ATP synthase subunit alpha	1456
113660000	6145700	37069000	0	0	0	0	0	45156000	78106000	6043700	0	22116000	0	213020000	0	12746000	461620000	0	28842000	3700500	0	0	0	1	1	17	2190.95	8.8122e-214	324.79	99907000000	441	HDCDLLREQYEEEQEAK	Q5SX39;Q5SX40	Myh4;Myh1	Myosin-4;Myosin-1	1607;1608
128520000	296730000	1593500000	214780000	1280900000	2271100000	6354100000	523410000	212340000	3261900000	358620000	192250000	1017600000	357200000	355460000	354350000	285620000	507850000	157170000	496050000	297110000	418440000	238200000	417540000	0	1	17	1785.91	8.3825e-199	317.97	99610000000	464	GQHAAEIQPLAQSHATK	P04247	Mb	Myoglobin	866
12565000	13979000	368900000	17462000	30541000	475770000	316240000	432980000	139920000	510800000	24921000	66326000	45005000	31588000	119640000	28104000	12554000	132350000	30629000	47677000	211830000	23677000	14962000	349640000	0	1	17	1879.86	2.1252e-57	188.9	99152000000	2107	NMWAAFPPDVGGNVDYK	P97457	Mylpf	Myosin regulatory light chain 2, skeletal muscle isoform	1425
476370000	398310000	2415700000	296230000	1340600000	1908700000	2113000000	1018500000	946320000	1682500000	770990000	472270000	859250000	110620000	825420000	528380000	239180000	327630000	589450000	436980000	1161200000	190940000	604390000	1738400000	1	1	16	1779.96	2.0394e-66	217.32	98866000000	329	IMNVIGEPIDERGPIK	P56480	Atp5b	ATP synthase subunit beta, mitochondrial	1231
121660000	50030000	1898700000	56894000	266920000	804340000	653050000	34573000	298220000	1177900000	74242000	143080000	235360000	27851000	487770000	61986000	6277000	107700000	64949000	133590000	483520000	21036000	80633000	467820000	1	1	17	1751.94	6.0972e-116	251.74	98847000000	461	ARDIVPGDIVEVAVGDK	Q8R429;B1ATS4;B1ATS5;E9Q559;Q64518	Atp2a1;Atp2a3	Sarcoplasmic/endoplasmic reticulum calcium ATPase 1;Calcium-transporting ATPase;Sarcoplasmic/endoplasmic reticulum calcium ATPase 3	2098;148
3420200	1908400000	15642000	1413000000	3606800000	15741000	35718000	13501000	3635300	9308900	2333900000	54598000	2531800000	64983000	35675000	1829800000	1007900000	129390000	2223800000	202120000	52367000	71864000	2096100000	10903000	0	1	15	1673.85	3.7601e-89	253.79	98702000000	226	NLTEEMAGLDEIIVK	Q91Z83	Myh7	Myosin-7	2210
0	0	0	0	0	0	0	0	0	0	0	0	0	0	22576000	0	21390000	44213000	17584000	91993000	112390000	0	24981000	285680000	0	1	8	800.476	0.00072424	140.35	98619000000	101	ALQASALK	P05064;A6ZI44;Q9CPQ9;A6ZI46	Aldoa;Aldoart1	Fructose-bisphosphate aldolase A;Fructose-bisphosphate aldolase	870
356040000	1601700000	1540000000	716690000	1953500000	2042400000	1813100000	880590000	582040000	1496800000	1660400000	577870000	2274800000	47508000	668720000	897810000	1350100000	1132300000	773590000	504480000	671210000	63486000	1438200000	1748300000	1	0	13	1500.67	7.3744e-43	225.97	97707000000	77	DTGTYEDFVEGLR	P09542	Myl3	Myosin light chain 3	909
38576000	52293000	111390000	0	238180000	260390000	485350000	52256000	83670000	211330000	74039000	42155000	192820000	200190000	80702000	53998000	31182000	52479000	0	70153000	77994000	78622000	63794000	166410000	1	0	14	1778.79	8.0258e-68	236.92	97596000000	343	LISWYDNEYGYSNR	P16858;A0A0A0MQF6;S4R1W1;D3YYI5;S4R257;D3Z0Z9	Gapdh;Gm3839;Gm7293	Glyceraldehyde-3-phosphate dehydrogenase	975;2893;389
6836700	974090	6443700000	0	95852000	4838100000	3586400000	3124100000	2442300000	4592500000	54812000	1941200000	190960000	102060000	1751400000	63354000	39481000	93621000	50307000	1558500000	4257400000	100250000	83465000	4628900000	0	1	15	1649.78	1.0795e-50	206.63	97025000000	215	MEIDDLASNVETVSK	G3UW82	Myh2		655
907930000	65513000	4240600000	31032000	167050000	822450000	321300000	284770000	576230000	3236800000	101710000	55589000	796530000	0	4131700000	155780000	117790000	2290200000	95644000	327080000	750640000	143400000	260280000	874470000	0	1	14	1660.79	7.3599e-89	259.96	96683000000	288	NAYEESLDHLETLK	Q5SX40	Myh1	Myosin-1	1608
580320000	32098000	1485900000	6881100	166520000	1561100000	1940400000	89859000	239110000	1900800000	9245900	235810000	185670000	13115000	253840000	19145000	6069900	11178000	71624000	141540000	465900000	0	13586000	669270000	2	1	24	2732.3	8.1836e-232	327.05	96591000000	413	RRAGAEGSSNVFSMFDQTQIQEFK	P97457;F6ULR7	Mylpf	Myosin regulatory light chain 2, skeletal muscle isoform	1425;621
10458000	1227300000	21145000	749010	2417400000	53260000	97685000	0	0	34749000	1607600000	17459000	2466200000	22867000	35907000	2227100000	724340000	50770000	2065900000	133420000	29680000	55062000	1805100000	56643000	0	1	13	1542.67	2.9092e-66	250.16	96381000000	71	YEESQSELESSQK	Q91Z83;Q02566	Myh7;Myh6	Myosin-7;Myosin-6	2210;1453
198750000	90353000	445700000	0	108120000	588010000	593680000	113910000	213470000	1002200000	111990000	273890000	197280000	28314000	520740000	105780000	54031000	316750000	110840000	166620000	527100000	48619000	127260000	526460000	0	1	26	2812.35	0	339.57	96335000000	856	IVEYLQSYDEITAMTGDGVNDAPALK	Q8R429	Atp2a1	Sarcoplasmic/endoplasmic reticulum calcium ATPase 1	2098
271850000	0	1289900000	29101000	8856500	430260000	987560000	141970000	361250000	572550000	0	613800000	93896000	42498000	831730000	50294000	9434900	794770000	43356000	686200000	952910000	132660000	33083000	1840800000	0	2	12	1429.73	5.599e-75	255.93	96074000000	260	IAEKDEEIDQLK	Q5SX39;Q5SX40;G3UW82;P13542	Myh4;Myh1;Myh2;Myh8	Myosin-4;Myosin-1;Myosin-8	1607;655;1608;945
1162100000	162710000	1457600000	143290000	54576000	411900000	93372000	192500000	55360000	2602500000	163140000	82521000	119180000	18916000	1908700000	16185000	71954000	1909000000	9949600	24268000	307700000	10985000	21144000	50863000	0	1	20	2169.01	3.2101e-283	358.13	96070000000	359	SELQAALEEAEASLEHEEGK	Q5SX40	Myh1	Myosin-1	1608
81991000	98171000	989040000	150390000	341870000	87572000	156350000	265590000	233460000	328010000	231040000	143180000	94128000	865230	283550000	820350000	6445900	0	1179800000	19136000	1148800000	135910000	115140000	105290000	2	1	12	1379.69	4.3601e-33	215.34	96028000000	197	TVRNDNSSRFGK	Q5SX39;D3YV80;E9QNH6;E9Q580;Q7TQD7;F6VXK7;P46735;Q91Z83;Q5SX40;Q02566;B8JJH5;G3UW82;B1AR69;P13542;P13541	Myh4;Myo1b;Myo15;Myh7;Myh1;Myh6;Myh2;Myh13;Myh8;Myh3	Myosin-4;Unconventional myosin-Ib;Myosin-7;Myosin-1;Myosin-6;Myosin-8;Myosin-3	1607;2210;655;1608;945;1453;944;141
0	35971000	41839000	63724000	0	0	0	54213000	46551000	4753100000	2725700	87493000	0	3605100	3662800000	122200000	0	832800000	104680000	2215500000	5255100000	239170000	246790000	3715800000	0	1	10	1160.59	9.705e-08	153.33	95522000000	63	TLEDQVSELK	Q5SX40;G3UW82;P13542	Myh1;Myh2;Myh8	Myosin-1;Myosin-8	655;1608;945
167160000	72306000	522400000	46932000	300660000	413260000	236780000	44922000	121280000	605120000	145500000	223910000	299140000	19310000	282500000	102620000	16167000	194100000	78281000	50656000	561580000	20482000	56010000	350330000	0	1	13	1439.67	3.2654e-134	295.62	94841000000	203	TGTLTTNQMSVCK	Q8R429	Atp2a1	Sarcoplasmic/endoplasmic reticulum calcium ATPase 1	2098
869290000	26971000	2713300000	22400000	37659000	2688400000	3010000000	1817300000	1169000000	1933600000	38179000	1410700000	163520000	41914000	2188800000	0	12165000	1998000000	16200000	952240000	2177000000	29717000	28787000	2817800000	1	1	18	1996.02	1.3672e-149	297.87	94621000000	290	DLEEATLQHEATAATLRK	Q5SX40;G3UW82;B1AR69	Myh1;Myh2;Myh13	Myosin-1	655;1608;141
41205000	55274000	311240000	0	319730000	424320000	852060000	159360000	0	422630000	53754000	48173000	315330000	100550000	60146000	84689000	31673000	58572000	65865000	121800000	95976000	82778000	97194000	116970000	1	1	22	2219.11	5.4976e-141	254.24	93704000000	506	AAVPSGASTGIYEALELRDGDK	P21550;Q5SX59;Q5SX60;Q5SX61;P17183;D3Z6E4;D3Z2S4;D3YVD3	Eno3;Eno2	Beta-enolase;Enolase;Gamma-enolase	1013;979
2459100	1166300	26278000	0	0	87428000	1188600000	0	530040000	22326000	0	5192100	0	0	479530000	0	14567000	821340000	21561000	289930000	886410000	76891000	0	880300000	1	0	8	1082.54	1.0195e-17	198.07	93448000000	512	MFLWMVTR	Q5SX39;Q5SX40;G3UW82;B1AR69;P13542	Myh4;Myh1;Myh2;Myh13;Myh8	Myosin-4;Myosin-1;Myosin-8	1607;655;1608;945;141
6240800	0	509810000	16266000	85971000	1011100000	826010000	16244000	2105900	712800000	0	105030000	194660000	32790000	260910000	46870000	42965000	460460000	30699000	130560000	468550000	24353000	58504000	699160000	0	1	12	1389.67	2.0299e-21	169.55	93349000000	395	NICYVITHGDAK	P97457	Mylpf	Myosin regulatory light chain 2, skeletal muscle isoform	1425
0	0	19022000	0	94315000	90136000	155180000	13451000	0	91464000	0	0	70192000	0	0	68171000	0	0	0	265320000	0	38028000	100070000	0	1	0	9	946.465	0.014576	66.692	93343000000	72	NAGCAVSLR	Q9D6K5;E9PVN6	Synj2bp;Gm20498	Synaptojanin-2-binding protein	2537
0	0	235850	0	0	0	0	0	0	0	0	0	0	43097000	1421300000	62883000	41594000	380220000	54534000	422850000	1840300000	24651000	55019000	1212900000	0	1	8	874.458	0.00075221	140.09	93327000000	107	MLGQTPTK	P20801	Tnnc2	Troponin C, skeletal muscle	1005
1067900000	68923000	1653700000	0	145860000	402950000	128560000	49004000	110310000	3398500000	0	64799000	287230000	0	5497500000	65858000	73254000	5433900000	54563000	145290000	496770000	82151000	55881000	783600000	0	1	14	1551.75	1.0071e-129	283.88	93316000000	274	LQDAEEHVEAVNAK	Q5SX40	Myh1	Myosin-1	1608
0	13616000	41775000	21991000	25630000	180670000	484870000	76361000	47633000	154730000	25851000	19461000	173730000	55227000	0	9331600	10451000	0	0	12516000	62985000	0	26543000	136880000	2	1	39	3915	0	422.91	92389000000	1044	RGTGGVDTAAVGAVFDISNADRLGSSEVEQVQLVVDGVK	P07310	Ckm	Creatine kinase M-type	884
0	0	21411000	0	0	51964000	0	0	0	0	0	9857100	79803000	12613000	14621000	12872000	9354000	17778000	0	15848000	0	26336000	0	0	2	0	14	1645.8	1.3952e-74	257.83	92184000000	121	RLQSIGTENTEENR	P05064;A6ZI44;D3YWI1;D3YV98;D3Z510	Aldoa	Fructose-bisphosphate aldolase A;Fructose-bisphosphate aldolase	870
9755300	10108000	130230000	14871000	153010000	119880000	583830000	0	0	171350000	0	9589700	190550000	86974000	118470000	52930000	23849000	194710000	15750000	138480000	118460000	62014000	83749000	292010000	0	1	13	1379.7	7.0771e-43	217.2	92088000000	328	GNPTVEVDLHTAK	P21550;Q5SX59;Q5SX60;Q5SX61	Eno3	Beta-enolase;Enolase	1013
70908000	11195000	507360000	8401900	8101400	329640000	295670000	132960000	72695000	683590000	0	1870300	45516000	0	292400000	23108000	13822000	88319000	13390000	113850000	480180000	25957000	13190000	582690000	0	2	14	1529.75	1.3246e-76	258.39	91807000000	248	VLGNPSNEEMNAKK	P05977;E0CZ30;E9PWG4	Myl1	Myosin light chain 1/3, skeletal muscle isoform	875;477
6631800	81854000	199040000	47117000	123600000	286370000	176580000	205130000	141900000	402540000	99396000	84682000	155430000	11186000	139630000	95734000	5314000	45339000	126650000	22340000	250990000	29860000	111220000	268240000	0	2	17	2058.03	4.333e-129	290.57	91458000000	826	KYEVLALLYHEPPEDDK	O09165;E9Q489	Casq1	Calsequestrin-1;Calsequestrin	756
0	1552600000	51380000	731730000	2860100000	50218000	114430000	0	0	57505000	1993000000	37282000	2551300000	20061000	16766000	1246400000	738490000	86397000	1468900000	86995000	53014000	56850000	1559700000	2986400	0	1	16	1645.88	3.7699e-73	223.52	91244000000	133	GQNVQQVSYAIGALAK	Q91Z83	Myh7	Myosin-7	2210
13733000	0	0	1209500000	3768300000	81716000	120190000	0	19386000	0	2717400000	25039000	2519700	19582000	26475000	3880900000	1599700000	56066000	4065500000	204350000	39201000	87764000	2780900000	48540000	1	0	9	1018.5	2.2518e-22	198.72	91044000000	47	SVNDLTSQR	Q91Z83	Myh7	Myosin-7	2210
0	0	0	0	0	0	0	0	0	0	559300000	246670000	1831200000	71924000	467080000	365790000	0	1259300000	378500000	352730000	806670000	159850000	344850000	3428200000	1	0	7	794.465	0.0092964	120.65	90999000000	90	IIAPPER	Q8BFZ3;P68033;P63260;B1ATY1;P60710;P62737;P63268;P68134;E9Q1F2	Actbl2;Actc1;Actg1;Actb;Acta2;Actg2;Acta1	Beta-actin-like protein 2;Actin, alpha cardiac muscle 1;Actin, cytoplasmic 2;Actin, cytoplasmic 2, N-terminally processed;Actin, cytoplasmic 1;Actin, cytoplasmic 1, N-terminally processed;Actin, aortic smooth muscle;Actin, gamma-enteric smooth muscle;Actin, alpha skeletal muscle	1367;1364;1310;1354;1255;518;1857
0	0	0	0	0	0	0	0	0	0	0	0	0	5286000	18313000	785810	8841800	134180	12748000	52510000	37275000	47368000	13879000	108210000	0	1	8	913.441	6.4927e-14	208.72	90633000000	182	PFGNTHNK	P07310	Ckm	Creatine kinase M-type	884
0	0	0	4170400	0	31398000	0	0	0	14331000	0	0	24304000	12813000	0	0	0	46067000	0	11974000	0	0	0	89546000	1	0	12	1415.71	1.9018e-125	291.5	90493000000	250	ANLMQAEIEELR	Q5SX39	Myh4	Myosin-4	1607
100180000	157460000	691390000	114490000	831360000	1174900000	3144200000	285590000	256660000	832260000	161160000	131870000	1599600000	255030000	573570000	271020000	120150000	407990000	125320000	313710000	523130000	220550000	174660000	682670000	1	1	16	1633.73	4.4423e-147	305.43	90456000000	432	RHSGDFGADAQGAMSK	P04247	Mb	Myoglobin	866
26161000	3680900	37119000	2579100	0	9017900	0	5830700	0	54361000	4158100	3574600	0	0	161370000	0	0	0	0	5368600	17759000	0	0	41992000	0	1	13	1515.79	3.2227e-06	124.12	90204000000	182	LLASIDIDHTQYK	P13541	Myh3	Myosin-3	944
991510000	99861000	2107300000	87607000	90533000	2440900000	2921800000	2523000000	1954900000	2206200000	0	1706500000	247120000	147930000	1252300000	124390000	44919000	0	107950000	1249400000	3135900000	503190000	139540000	3406700000	0	1	14	1475.8	6.5116e-14	156.6	90133000000	137	AAYLQGLNSADLLK	G3UW82	Myh2		655
458260	0	0	0	79858000	101070000	225010000	0	6600100	69793000	0	0	124190000	80488000	14749000	0	871390	0	0	20737000	21097000	0	21171000	0	1	2	36	4091.09	0	445.41	90084000000	428	HLEGMSDQAIMELNLPTGIPIVYELDQNLKPTKPMR	O70250	Pgam2	Phosphoglycerate mutase 2	808
451140000	387000000	2142000000	36152000	1673300000	1735000000	1984900000	800560000	744420000	1306500000	724980000	793380000	968450000	118980000	1206300000	493130000	232970000	473200000	646160000	627370000	1177500000	227670000	779980000	870310000	1	0	16	1841.87	1.2736e-90	263.2	89686000000	392	IMDPNIVGNEHYDVAR	P56480	Atp5b	ATP synthase subunit beta, mitochondrial	1231
0	0	81065000	18533000	0	224110000	0	0	0	0	0	0	259600000	0	68174000	18892000	0	164590000	0	0	0	0	0	159450000	1	0	13	1310.74	4.2959e-93	229.4	89211000000	332	PVSPLLLASGMAR	P07310;Q04447	Ckm;Ckb	Creatine kinase M-type;Creatine kinase B-type	884;1458
0	1107000000	40254000	343070000	1315700000	33484000	112980000	43454000	16046000	15865000	1799800000	5188200	679940000	5019800	0	1437600000	1041200000	0	2127600000	14198000	5270900	38969000	2607700000	0	0	1	8	946.516	0.00047743	160.26	88768000000	64	MVSLLQEK	Q91Z83;Q02566;B8JJH5;B1AR69	Myh7;Myh6;Myh13	Myosin-7;Myosin-6	2210;1453;141
840270000	46933000	2737900000	0	45918000	2714900000	2275700000	2938000000	1928100000	2271400000	0	1803200000	182900000	97365000	1383500000	90906000	44159000	71734000	46348000	1554500000	3745300000	96825000	105850000	4083100000	0	1	13	1483.79	2.06e-106	275.35	88416000000	210	IEDEQAIGIQLQK	G3UW82	Myh2		655
0	0	0	0	0	0	0	0	0	0	0	0	0	0	740690000	335490000	451230000	1403300000	267160000	380430000	602750000	47051000	301230000	1150700000	1	0	8	994.472	2.1237e-06	180.93	88124000000	101	YETDAIQR	Q5SX39;Q91Z83;Q5SX40;Q02566;G3UW82;B1AR69;P13542;P13541	Myh4;Myh7;Myh1;Myh6;Myh2;Myh13;Myh8;Myh3	Myosin-4;Myosin-7;Myosin-1;Myosin-6;Myosin-8;Myosin-3	1607;2210;655;1608;945;1453;944;141
0	0	63777000	0	206540000	141320000	557280000	38405000	38982000	29791000	0	5147700	3472300	23101000	12443000	0	0	26666000	0	13383000	0	0	0	0	1	0	26	2926.4	0	421.39	87848000000	548	AGHPFMWNEHLGYVLTCPSNLGTGLR	P07310	Ckm	Creatine kinase M-type	884
5832700	17010000	563140000	135670000	593980000	780060000	595610000	370270000	325390000	741100000	358030000	5135800	585410000	28968000	239700000	217320000	138480000	366240000	148630000	142420000	360750000	27794000	280980000	634460000	0	1	28	3187.47	0	367.89	87446000000	763	CPETLFQPSFIGMESAGIHETTYNSIMK	P68033;P62737;P63268;P68134	Actc1;Acta2;Actg2;Acta1	Actin, alpha cardiac muscle 1;Actin, aortic smooth muscle;Actin, gamma-enteric smooth muscle;Actin, alpha skeletal muscle	1367;1364;1310
32357000	1693400000	247680000	629050000	3105400000	1183700000	3409900000	454820000	97477000	316030000	2309500000	163610000	5895800000	122870000	245140000	1222900000	1451300000	998090000	1225700000	441060000	165540000	119590000	1408900000	375900000	1	0	9	1077.51	3.2341e-08	174.02	86599000000	44	EMLTTQAER	P51667;E9Q8Y0;D3YUI7	Myl2	Myosin regulatory light chain 2, ventricular/cardiac muscle isoform	1186;350
0	0	0	31413000	141320000	201870000	0	0	0	0	45996000	0	0	45719000	60159000	57428000	30130000	23747000	39959000	68279000	97079000	60406000	46780000	136210000	0	1	11	1133.57	1.371e-17	176.87	86472000000	133	TAIQAAGYPDK	P21550;J3QPZ9	Eno3	Beta-enolase;Enolase	1013
0	0	1886900000	0	0	0	2833100	894550000	0	2813500000	19166000	566490000	0	44397000	1350700000	0	34984000	585160000	13219000	500320000	1583700000	100090000	3831800	2224900000	0	1	8	931.45	0.00239	122.52	86220000000	86	IDVAEEEK	P13412;A2A6J8;A2A6K0	Tnni2	Troponin I, fast skeletal muscle	943
804190000	0	4014400000	0	67587000	3481400000	5136900000	2137600000	1332100000	4087500000	49664000	1278900000	151230000	61052000	766890000	49598000	30032000	109650000	62615000	977790000	2992000000	293800000	83594000	2351900000	0	1	16	1584.85	1.07e-274	359.25	85984000000	166	GQTVEQVTNAVGALAK	G3UW82	Myh2		655
0	0	0	2188400000	0	0	0	0	0	0	0	0	0	4290100000	7844000000	0	0	0	0	9122100000	0	3575000	0	8334400000	1	0	21	2371.03	0.038251	22.585	85442000000	12	DCIGGCSDLISMQQTGELMTR	Q9QUH0	Glrx	Glutaredoxin-1	2729
0	435110000	0	3843500	1728600000	0	82073000	0	2153900	4551100	2677200	19510000	1018700000	0	5273800	438700000	369170000	37698000	662550000	2365400	52332000	28536000	323230000	843250000	0	1	8	829.445	1.3134e-05	164.72	85409000000	89	IHFGATGK	Q5SX39;Q91Z83;Q02566;B8JJH5;B1AR69	Myh4;Myh7;Myh6;Myh13	Myosin-4;Myosin-7;Myosin-6	1607;2210;1453;141
110620000	634010000	951820000	429850000	0	0	0	530380000	437520000	0	564440000	379570000	0	1580800	1920200000	755990000	348210000	86334000	1310300000	461010000	1523500000	187990000	528820000	1970100000	0	1	8	874.44	0.0037604	115.7	85218000000	124	SLEAQAEK	E9Q7Q3;D3Z6I8;F8WID5;G5E8R1;E9Q455;Q8BSH3;B7ZNL3;P21107;P58771	Tpm3;Tpm1	Tropomyosin alpha-3 chain;Tropomyosin alpha-1 chain	646;1007;1921;1242;177;551
26022000	0	72373000	0	60530000	240230000	0	0	54740000	103260000	0	0	0	73645000	106970000	60968000	0	0	32640000	154390000	110900000	104180000	48715000	114360000	0	1	8	787.444	0.0042505	107	84381000000	42	TLLAAGDK	P32848	Pvalb	Parvalbumin alpha	1079
838140000	47657000	3293000000	74210000	88338000	4738000000	4316600000	2157800000	1396800000	4331300000	81482000	959000000	242680000	68445000	924140000	52683000	25477000	30229000	37671000	806150000	3387900000	138020000	70745000	2038800000	1	1	15	1753.96	4.9156e-102	270.79	84072000000	407	DLQLRLDEAEQLALK	G3UW82	Myh2		655
51943000	46692000	144380000	33998000	246790000	197440000	607460000	80939000	89706000	191070000	35499000	28438000	438580000	81943000	85212000	30164000	13370000	155780000	8758200	39817000	41564000	48332000	38910000	76626000	0	1	19	2351.07	0	470.57	83796000000	364	SMTEQEQQQLIDDHFLFDK	P07310	Ckm	Creatine kinase M-type	884
0	0	0	0	20298000	40197000	0	24983000	0	0	9892400	13849000	69523000	19776000	0	0	11352000	16444000	0	21565000	22045000	18137000	12366000	26174000	0	1	12	1307.63	2.9769e-39	226.04	83508000000	236	SMTDVLSAEDIK	P32848	Pvalb	Parvalbumin alpha	1079
225120000	188050000	0	0	197510000	0	661920000	615870000	382420000	0	218510000	295850000	0	26755000	609420000	180770000	105590000	144780000	287090000	224020000	418450000	66769000	308820000	673840000	0	1	11	1106.56	1.3145e-06	130.01	82668000000	149	GVGFGLVDSEK	O09165	Casq1	Calsequestrin-1	756
436980000	368810000	1849800000	442840000	2019100000	0	1563500000	405690000	467220000	0	0	0	2008600000	119060000	1774600000	612730000	432750000	345300000	798230000	647850000	1833100000	247630000	592820000	1785400000	1	0	8	855.481	3.467e-09	170.24	81832000000	102	TAVAPIER	P51881;P48962;Q3V132	Slc25a5;Slc25a4;Slc25a31	ADP/ATP translocase 2;ADP/ATP translocase 2, N-terminally processed;ADP/ATP translocase 1;ADP/ATP translocase 4;ADP/ATP translocase 4, N-terminally processed	1158;1191;1576
31962000	3130300	1391800000	0	0	1919700000	1512300000	721820000	487710000	3167400000	15251000	374400000	0	1966500	1350600000	155410000	0	0	239250000	0	19282000	0	180030000	929260000	1	2	12	1460.77	0.0096634	85.813	81685000000	48	LREMNTEAEKLK	Q8C735	Lin9	Protein lin-9 homolog	1975
0	0	240390000	0	167340000	474780000	466880000	119640000	0	232240000	0	0	278980000	0	127260000	53448000	5886300	32806000	51290000	133340000	185590000	102930000	59295000	215470000	0	2	9	1044.58	1.4947e-85	248.45	81518000000	155	KLSVVDQEK	P21550;Q5SX59	Eno3	Beta-enolase;Enolase	1013
241170000	252820000	1330000000	144820000	1672300000	1435300000	1497500000	702550000	473060000	1476600000	263780000	253510000	515150000	50499000	612540000	311550000	129690000	462390000	305670000	242540000	788240000	68575000	41155000	837970000	0	1	18	2022	2.1738e-94	266.29	81356000000	540	FLSQPFQVAEVFTGHMGK	P56480	Atp5b	ATP synthase subunit beta, mitochondrial	1231
0	24908000	787150000	0	27823000	1143500000	142780000	1094800000	0	0	17775000	0	75162000	22188000	834840000	14197000	0	166330000	13410000	80777000	1197800000	70592000	13176000	1252600000	0	1	8	865.404	0.0037697	114.2	81217000000	104	MSADAMLK	P13412;A2A6J8;A2A6K0	Tnni2	Troponin I, fast skeletal muscle	943
1965800	157050000	689920000	0	471400000	730370000	520470000	236230000	120890000	851680000	251590000	0	490740000	0	278950000	215240000	95515000	670420000	201860000	149770000	376470000	0	234390000	484410000	0	1	13	1474.77	1.3223e-193	328.43	80510000000	286	DPLNETVVGLYQK	Q5SX39;Q91Z83;Q5SX40;Q02566;B8JJH5;G3UW82;B1AR69;P13541	Myh4;Myh7;Myh1;Myh6;Myh2;Myh13;Myh3	Myosin-4;Myosin-7;Myosin-1;Myosin-6;Myosin-3	1607;2210;655;1608;1453;944;141
11680000	10029000	25029000	8655100	15736000	58477000	5494800	0	0	29396000	14136000	0	33269000	7439400	19023000	0	4947300	47166000	0	16691000	15755000	17342000	0	392940000	1	0	10	1271.61	1.3233e-112	280.25	80022000000	304	HTVYSMEHIR	O88990	Actn3	Alpha-actinin-3	843
15475000	10336000	34316000	15868000	28289000	49393000	13533000	45793000	42520000	44134000	3809300	3656200	89710000	12613000	15793000	0	0	0	9089300	0	14773000	22634000	23594000	35652000	1	1	27	3049.6	0	425.68	79932000000	312	VAEQELLDASERVQLLHTQNTSLINTK	Q5SX39	Myh4	Myosin-4	1607
10417000	1421100000	7200600	696250000	1651500000	112350000	14316000	53556000	27661000	62651000	1847600000	16674000	2432600000	31443000	37055000	894680000	667900000	37627000	1063200000	113380000	0	42309000	1836800000	72147000	1	0	11	1272.63	9.1167e-25	209.8	79852000000	63	DTQIQLDDAVR	Q91Z83	Myh7	Myosin-7	2210
657010000	73051000	3852700000	699440	78781000	4366900000	4457200000	2763300000	1340700000	2929600000	13472000	351040000	26583000	0	1022100000	78693000	30383000	11274000	73637000	1058200000	2930500000	348040000	82921000	2477300000	0	2	17	1831.97	5.9086e-65	207.53	79542000000	160	VLNASAIPEGQYIDSKK	G3UW82	Myh2		655
35611000	1181900000	84278000	355290000	3123300000	350530000	1220500000	347900000	100940000	123290000	1648500000	101420000	2218900000	46048000	51462000	1079500000	658320000	295750000	1606700000	172580000	63458000	68543000	1852100000	83876000	0	1	13	1403.69	2.5787e-42	222.72	79425000000	111	GADPEETILNAFK	P51667;E9Q8Y0;D3YUI7;D3YW14;D3Z0I3	Myl2	Myosin regulatory light chain 2, ventricular/cardiac muscle isoform	1186;350
92470000	897180000	113280000	372230000	1799300000	490770000	75646000	79638000	62009000	105290000	3141800000	47596000	1441600000	106300000	156740000	1794200000	136310000	42497000	2554400000	53485000	243840000	282280000	2045200000	275740000	2	0	10	1241.62	3.467e-20	210.98	79378000000	111	ERPVEVGDWR	D3YUN3;F6QC77;Q9WUZ5	Tnni1	Troponin I, slow skeletal muscle	352
0	0	354040000	0	0	0	0	0	45894000	0	0	0	1845800	0	0	0	0	0	30939000	0	0	0	0	0	2	0	16	1879.91	1.7194e-159	294.93	79182000000	360	AYTGREFDDLPLAEQR	Q8R429	Atp2a1	Sarcoplasmic/endoplasmic reticulum calcium ATPase 1	2098
3842200	4666200	5316100	6611700	16307000	32274000	10687000	2939600	6384300	7667000	4859400	0	48529000	6328000	8089000	15556000	8589700	20311000	13777000	28650000	14512000	42632000	12261000	50183000	2	1	14	1770.89	2.7453e-164	306.65	78489000000	280	VRELENEVENEQKR	Q5SX39	Myh4	Myosin-4	1607
9941600	904350000	23111000	407180000	1761500000	48133000	40913000	0	16953000	23444000	1855800000	0	1881200000	9827700	0	799270000	495540000	62155000	1095700000	40386000	22447000	15966000	2018300000	15454000	0	1	15	1591.82	8.031e-78	241.98	78232000000	224	VLSNMGAHFGGYLVK	E9Q688;O88346;J3QPC8;E9QA86;E9Q0G9;E9PZB4	Tnnt1	Troponin T, slow skeletal muscle	543
11030000	0	0	0	38071000	125450000	0	0	0	28233000	9172100	22126000	91021000	29589000	26293000	0	20143000	35686000	11856000	0	26825000	0	20918000	44077000	0	1	7	870.496	0.0040277	130.77	78170000000	212	VFHILDK	P32848	Pvalb	Parvalbumin alpha	1079
43323000	1311700000	122210000	189210000	3971300000	682670000	1980300000	266100000	46967000	246880000	630850000	189680000	2964000000	92321000	72487000	1240200000	572940000	125320000	1939500000	120570000	32686000	43770000	645930000	31090000	1	1	16	1898.88	4.7414e-244	346.42	78128000000	210	EAFTIMDQNRDGFIDK	P51667;E9Q8Y0;F6RBQ5;D3YUI7;D3YW14;D3Z0I3;D3Z1V1;E9QNY3;Q62082	Myl2;Myl10	Myosin regulatory light chain 2, ventricular/cardiac muscle isoform;Myosin regulatory light chain 10	1186;350;587
78493000	23554000	579230000	14126000	30534000	634060000	1007100000	219440000	0	732930000	24037000	154980000	71517000	13954000	245390000	3475000	26548000	531170000	13245000	73077000	317690000	50011000	13210000	653430000	2	1	15	1800.88	1.355e-89	257.52	77977000000	342	HIAEDADRKYEEVAR	F8WID5;G5E8R1;E9Q455;G5E8R2;Q8BSH3;B7ZNL3;E9Q448;P58771;Q8BP43;E9Q456	Tpm1	Tropomyosin alpha-1 chain	646;1921;1242;177
241270000	0	2766700000	0	0	1859100000	2568800000	0	0	1635900000	0	0	0	0	703810000	0	0	251910000	14870000	369470000	1189300000	0	0	1225800000	1	0	7	880.465	0.00077857	143.56	77686000000	93	YDITTLR	A2A6J1;A2A6I8;A2A6H6;Z4YKF8;Z4YKG3;Z4YKG8;Z4YJU0;Z4YNB2;Q9QZ47;Z4YKH8;Z4YKE7;J3QP61;A2A6J0	Tnnt3	Troponin T, fast skeletal muscle	43;42
2645000	0	6174300	2074400	3460900	10664000	0	5774000	5830700	6342900	7534100	4810900	10517000	1274400	3640700	1333200	1839600	14378000	1444400	0	3240600	2588900	0	68047000	0	1	11	1276.58	2.3837e-40	231.7	77303000000	246	DDQVFSMNPPK	Q5SX39	Myh4	Myosin-4	1607
15619000	10610000	44406000	19249000	17183000	13429000	9807100	13404000	10205000	28865000	16636000	8569800	69173000	4169900	8945400	43436000	0	0	40966000	0	38567000	50641000	11576000	0	1	1	12	1252.6	2.8372e-66	254.82	77206000000	145	GFSSDARDLSAK	P32848	Pvalb	Parvalbumin alpha	1079
6723900	892210000	10771000	738190000	2533600000	44441000	58548000	55956000	0	18699000	1886500000	0	2001400000	14707000	0	962720000	367380000	28713000	999430000	64457000	13907000	21462000	1289200000	17469000	0	1	15	1746.87	5.2164e-78	252.52	77142000000	119	LELDDVTSNMEQIIK	Q91Z83;Q02566	Myh7;Myh6	Myosin-7;Myosin-6	2210;1453
255270000	343890000	2063600000	200530000	499520000	1015200000	1211100000	1182300000	400660000	1431700000	762100000	324480000	3787900	65711000	531430000	2360500	160880000	231670000	262740000	292800000	701520000	142410000	346890000	1155600000	1	0	13	1422.67	4.2559e-90	270.21	77108000000	202	TGTAEMSSILEER	Q03265;D6RJ16	Atp5a1	ATP synthase subunit alpha, mitochondrial	1456
210540000	500060000	2326200000	168910000	555810000	1440400000	1677000000	737110000	484200000	1733500000	490480000	0	429240000	79203000	675430000	396850000	174590000	752020000	164520000	238520000	771040000	124040000	237980000	1246700000	1	0	15	1649.91	7.1547e-116	275.42	76271000000	396	LVLEVAQHLGESTVR	P56480	Atp5b	ATP synthase subunit beta, mitochondrial	1231
292400000	214780000	410100000	108650000	817390000	1794500000	1426600000	330650000	102920000	1145000000	365340000	132660000	741930000	149610000	147280000	266300000	60651000	96005000	245140000	161480000	241070000	73512000	318440000	638020000	1	1	17	1932.95	0	381.89	75739000000	374	AGTQIENIEEDFRNGLK	O88990;Q9JI91;D3YY95	Actn3;Actn2	Alpha-actinin-3;Alpha-actinin-2	843;2684
351400000	288920000	723810000	292800000	1029100000	396890000	802350000	270200000	352610000	371940000	617030000	419560000	671100000	48277000	414610000	1158800000	154510000	94977000	49788000	139940000	522120000	46679000	332650000	946150000	1	2	18	2153.05	1.6472e-142	274.27	75227000000	378	TKYETDAIQRTEELEEAK	Q5SX39;Q91Z83;Q5SX40;Q02566;G3UW82;B1AR69;P13542;P13541	Myh4;Myh7;Myh1;Myh6;Myh2;Myh13;Myh8;Myh3	Myosin-4;Myosin-7;Myosin-1;Myosin-6;Myosin-8;Myosin-3	1607;2210;655;1608;945;1453;944;141
8721600	1378100000	24891000	460320000	1489900000	33067000	76017000	49918000	13133000	11352000	1314600000	9617500	1043800000	13793000	0	1361500000	872150000	65842000	1259100000	97699000	14932000	25146000	1698100000	0	1	1	15	1864.9	8.0857e-191	323.95	75093000000	169	NAYEESLEHLETFKR	Q91Z83;Q02566	Myh7;Myh6	Myosin-7;Myosin-6	2210;1453
0	0	0	0	1550600	8399900	183330000	0	0	33093000	894730	0	1373100	43407000	472550000	733040000	372680000	0	616090000	341320000	623000000	74543000	416980000	1185300000	1	1	7	918.459	5.0719e-51	223.6	75053000000	186	CDIDIRK	P68033;P62737;P63268;P68134	Actc1;Acta2;Actg2;Acta1	Actin, alpha cardiac muscle 1;Actin, aortic smooth muscle;Actin, gamma-enteric smooth muscle;Actin, alpha skeletal muscle	1367;1364;1310
0	1638400000	0	717810000	1767200000	0	0	0	0	0	1554000000	12604000	2113300000	0	9492900	1639700000	453450000	143290000	1154200000	12237000	19343000	42231000	1592700000	0	0	0	16	1743.8	9.4935e-47	211.06	75001000000	81	AISDELDHALNDMTSI	E9Q7Q3;P21107	Tpm3	Tropomyosin alpha-3 chain	1007;551
0	0	131170000	2821900	46957000	660310	6928900	0	7719500	0	58045000	0	193810000	9488200	65029000	45568000	26120000	92764000	33819000	59689000	112810000	40705000	37558000	154180000	0	1	10	1165.62	2.0028e-07	151.22	74515000000	221	IGAEVYHHLK	P21550;Q5SX59	Eno3	Beta-enolase;Enolase	1013
0	0	0	3626900	0	20020000	4806200	4520900	4268300	11623000	9402400	0	17595000	0	10506000	0	0	55610000	0	6688300	4312600	0	3395800	189940000	1	0	17	1685.88	1.8241e-162	288.45	74295000000	352	LAAGLAGSLEEQMAGLR	O88990	Actn3	Alpha-actinin-3	843
0	367080000	0	390700000	1403600000	0	0	10983000	6976600	0	824340000	6592500	721810000	0	0	1196100000	0	0	1791400000	0	2512500	17842000	1019400000	25682000	3	0	20	2281.16	9.317e-227	335.29	73853000000	282	MRRDLEEATLQHEATAAALR	Q5SX39;Q91Z83;Q02566	Myh4;Myh7;Myh6	Myosin-4;Myosin-7;Myosin-6	1607;2210;1453
691980	1360700000	1339400	757860000	2017900000	69302000	67614000	71442000	16003000	4078800	1242700000	42539000	1547300000	43797000	2430800	1202500000	685570000	36135000	1725300000	1340000	0	7587600	1759300000	6219900	0	2	19	2238.11	0	382.44	73632000000	202	SEFKLELDDVTSNMEQIIK	Q91Z83;Q02566	Myh7;Myh6	Myosin-7;Myosin-6	2210;1453
0	7539000	16523000	6976800	18484000	64376000	16310000	12895000	0	30757000	9414100	0	58889000	14329000	14147000	4577900	9241600	14334000	18826000	20915000	14354000	12809000	16535000	183980000	1	0	17	2012.9	0	448.05	73544000000	477	MEGDLNEMEIQLNHANR	Q5SX39;P13542	Myh4;Myh8	Myosin-4;Myosin-8	1607;945
0	0	0	0	0	0	0	0	0	0	0	0	0	1493400	20964000	0	19705000	0	13533000	5051400	37335000	28692000	20323000	62273000	0	2	9	1001.49	3.8872e-07	192.26	73057000000	96	HGGYKPTDK	P07310	Ckm	Creatine kinase M-type	884
404560	16799000	563080000	17708000	92315000	218900000	336400000	12155000	7599600	560890000	10849000	2851500	105260000	12422000	185420000	42397000	17344000	60019000	42138000	70199000	215980000	17910000	48889000	316610000	1	2	16	1829.88	3.8374e-91	222.25	73017000000	716	DTPPKREEMVLDDSAK	Q8R429	Atp2a1	Sarcoplasmic/endoplasmic reticulum calcium ATPase 1	2098
0	0	0	0	0	0	0	18207000	20389000	3469100	13035000	0	0	20410000	0	22844000	3008900	4310300	0	18041000	0	0	0	1455300000	0	2	19	2234.04	0	391.39	72981000000	205	LAQESTMDIENDKQQLDEK	Q5SX39;P13542	Myh4;Myh8	Myosin-4;Myosin-8	1607;945
4400800	1262500000	14155000	861320000	1811700000	31283000	0	8209600	0	0	1510900000	0	1421900000	0	0	1264800000	237600000	44724000	1444500000	36145000	18715000	70256000	1802800000	12408000	2	0	14	1471.74	3.0744e-88	257.76	72822000000	111	AADAEAEVASLNRR	E9Q5J9;Q8K0Z5;P21107	Tpm3	Tropomyosin alpha-3 chain	1007;541
0	0	42305000	0	138360000	102320000	365290000	39139000	32534000	81150000	0	0	117450000	55835000	32939000	24401000	11137000	25761000	12626000	29289000	27011000	21632000	0	44696000	0	1	13	1461.81	2.513e-20	170.95	72537000000	198	IYVDDGLISLQVK	P52480	Pkm	Pyruvate kinase PKM	1196
172250000	149400000	843710000	154160000	195010000	148040000	560930000	54630000	279750000	722400000	234140000	104050000	281000000	18686000	298070000	179450000	18872000	62901000	666510000	138860000	695610000	53507000	357340000	468630000	1	1	20	2132.17	4.2717e-134	260.08	72474000000	817	STTLRVDQSILTGESVSVIK	Q8R429;O55143;J3KMM5	Atp2a1;Atp2a2	Sarcoplasmic/endoplasmic reticulum calcium ATPase 1;Sarcoplasmic/endoplasmic reticulum calcium ATPase 2;Calcium-transporting ATPase	2098;803
0	0	0	0	0	0	0	0	0	0	0	0	0	0	0	0	0	0	0	0	0	0	0	0	2	1	17	2001.99	2.1077e-248	346.63	72210000000	83	ARLHTESGEFSRQLDEK	Q5SX39	Myh4	Myosin-4	1607
11232000	0	595210000	1666000	0	342910000	237740000	36666000	34645000	630700000	5192100	95967000	2134200	0	336010000	11426000	7965200	565810000	0	49751000	176950000	7044100	18777000	348540000	0	1	11	1227.58	7.8871e-59	254.19	71938000000	273	SFSADQIADFK	E9PWG4	Myl1		477
11150000	795560000	29289000	594430000	2106100000	51178000	60268000	64749000	20971000	28538000	1515800000	26773000	1571300000	24564000	0	2126600000	79826000	0	2437900000	92815000	21856000	21983000	1467800000	24931000	1	1	27	3120.64	0	422.72	71856000000	162	LAEQELIETSERVQLLHSQNTSLINQK	Q91Z83;Q02566	Myh7;Myh6	Myosin-7;Myosin-6	2210;1453
26043000	23187000	65048000	15779000	40684000	44726000	22037000	29762000	22509000	44090000	69938000	9685300	47034000	4583600	29615000	25194000	10516000	38973000	15789000	8724600	22525000	3794300	45712000	580480000	1	0	21	2227.06	1.5531e-249	321.24	71731000000	443	DLYANNVLSGGTTMYPGIADR	P68033;P62737;P63268	Actc1;Acta2;Actg2	Actin, alpha cardiac muscle 1;Actin, aortic smooth muscle;Actin, gamma-enteric smooth muscle	1364;1310
39516000	1624500000	116380000	344870000	431330000	557820000	2226700000	354500000	184630000	189520000	83756000	100360000	0	114130000	68674000	264550000	465390000	1139300000	374850000	336630000	217910000	89107000	3143900000	202790000	0	1	18	1997	2.4533e-65	207.56	71470000000	165	EAPGPINFTVFLTMFGEK	P51667;E9Q8Y0;F6RBQ5;D3YUI7;D3YW14;D3Z0I3;E9QNY3;Q62082	Myl2;Myl10	Myosin regulatory light chain 2, ventricular/cardiac muscle isoform;Myosin regulatory light chain 10	1186;350;587
620360000	60707000	2232300000	118510000	41186000	2665500000	3124900000	2915800000	861820000	2443800000	109830000	1237200000	120280000	62551000	793260000	56896000	29954000	113000000	35215000	783550000	2435200000	356680000	85473000	2169000000	0	1	23	2200.06	0	343.28	70917000000	635	TLAYLFSGAQTAEAEASSGGAAK	G3UW82	Myh2		655
0	1890900	0	0	0	426790000	124760000	0	522910	248640000	0	0	0	0	0	0	78070000	301410000	2637900	0	0	0	0	0	1	0	15	1528.73	2.9083e-90	264.97	70833000000	210	IGGHGAEYGAEALER	Q91VB8;P01942	haemaglobin alpha 2;Hba	Hemoglobin subunit alpha	2166
5956900	519290000	22868000	34007000	1294700000	52219000	0	18135000	0	19607000	1409600000	0	805490000	0	8354000	1674300000	914470000	92360000	1854400000	13778000	9688300	47346000	872610000	11367000	0	1	13	1551.73	1.3004e-65	244.73	70782000000	129	TIDDLEDELYAQK	E9Q7Q3;P21107	Tpm3	Tropomyosin alpha-3 chain	1007;551
0	807550000	0	601680000	1623900000	0	600610000	638600000	25138000	415760000	1960400000	482270000	900830000	0	146000000	0	219800000	0	1630700000	93597000	194830000	104790000	419140000	208570000	0	1	13	1353.73	4.1014e-20	202.92	70761000000	97	ALGQNPTNAEVLK	Q8CI43;Q60605	Myl6b;Myl6	Myosin light chain 6B;Myosin light polypeptide 6	2005;1619
42414000	57966000	132510000	55852000	354680000	10038000	932850000	122720000	98263000	208960000	52088000	7094500	199260000	136300000	128430000	51683000	44497000	47856000	38431000	93739000	82357000	96828000	68284000	91959000	0	1	12	1355.65	1.4554e-08	153.75	70677000000	438	VVDLMAYMASKE	P16858;A0A0A0MQF6;S4R1W1;D3YYI5;V9GX06;D3Z0Z9	Gapdh;Gm3839;Gm7293;Gm11214	Glyceraldehyde-3-phosphate dehydrogenase	975;389
6522000	924790000	8750100	685940000	1885800000	0	64215000	15968000	14592000	19232000	954850000	7145800	787320000	14764000	7147300	1407500000	370820000	0	2331900000	61510000	17132000	53358000	2330500000	4603700	1	2	18	2236.08	1.111e-157	288.78	70598000000	209	NAYEESLEHLETFKRENK	Q91Z83;Q02566	Myh7;Myh6	Myosin-7;Myosin-6	2210;1453
2436200	0	0	0	0	15383000	5747000	4054900	5830500	3885500	2830500	0	9389800	0	0	4109700	0	0	5725100	0	2147900	8004700	0	0	1	1	10	1173.63	1.1016e-15	183.57	70574000000	60	NLRNTQGMLK	Q5SX39	Myh4	Myosin-4	1607
242860000	767690000	1198800000	460890000	1691000000	941880000	1150100000	795330000	404260000	1155000000	1566000000	446020000	999660000	31112000	507360000	1068400000	294950000	548130000	919340000	347250000	793730000	30603000	1083000000	1118600000	0	1	12	1508.74	9.075e-33	210.79	70336000000	75	IEFTPEQIEEFK	P09542	Myl3	Myosin light chain 3	909
0	0	132820000	36583000	0	180670000	728070000	0	0	214610000	109040000	39061000	457450000	86100000	66087000	44941000	33674000	54837000	49807000	32953000	157730000	41274000	17800000	484280000	0	1	10	1119.59	1.599e-11	159.11	70219000000	174	STTTGHLIYK	P62631;P10126;D3YZ68;D3Z3I8	Eef1a2;Eef1a1	Elongation factor 1-alpha 2;Elongation factor 1-alpha 1	1307;915
10645000	7107000	60634000	637910000	2597100000	93574000	246630000	91393000	27513000	68628000	960320000	7572500	1543700000	18509000	3679300	2433100000	2204900000	137120000	2274000000	57543000	16344000	0	1885900000	33517000	1	0	12	1416.71	4.3686e-56	247.88	70012000000	122	LAEQELIETSER	Q91Z83;Q02566	Myh7;Myh6	Myosin-7;Myosin-6	2210;1453
114480000	142340000	529840000	54393000	0	9913400	0	38797000	189480000	0	218440000	0	155400000	0	363470000	108940000	283710000	508710000	98485000	131900000	202840000	23694000	110650000	829340000	0	1	15	1573.86	5.2959e-42	192.78	69964000000	235	VDQSILTGESVSVIK	Q8R429;O55143;J3KMM5	Atp2a1;Atp2a2	Sarcoplasmic/endoplasmic reticulum calcium ATPase 1;Sarcoplasmic/endoplasmic reticulum calcium ATPase 2;Calcium-transporting ATPase	2098;803
3285100	5325700	410540000	0	332950000	572750000	620500000	2001100	129600000	561640000	166030000	96146000	476660000	38543000	295010000	239100000	33040000	577050000	315580000	236290000	695550000	46374000	453620000	801590000	0	1	30	3349.63	0	416.49	69870000000	446	GFQQILAGEYDHLPEQAFYMVGPIEEAVAK	P56480	Atp5b	ATP synthase subunit beta, mitochondrial	1231
0	0	0	0	0	38202000	73285000	0	6556700	3171300	0	0	4640300	7424900	7163900	4049100	2023000	14324000	2208600	6581100	8598300	3934600	6097100	41782000	0	1	17	1943.11	5.7528e-88	232.28	69617000000	179	LLIVSNPVDILTYVAWK	P06151;G5E8N5;D3Z736;D3YZQ9	Ldha	L-lactate dehydrogenase A chain;L-lactate dehydrogenase	876
0	0	7470200	0	3246900	0	9428300	0	0	15815000	2988100	0	0	0	0	0	0	0	1833700000	0	1860900000	2078100000	0	2283400000	1	0	15	1594.9	0.0001594	65.477	69616000000	9	VQTVLGLVEPSQLGR	Q60866;A2AUR3;A2AUR5	Pter	Phosphotriesterase-related protein	1633
38284000	1267100000	55088000	243770000	3513500000	286690000	1944400000	269470000	59380000	203690000	1901600000	110300000	2845800000	0	60022000	1678400000	215860000	132320000	1593600000	83181000	94189000	27224000	558770000	25904000	2	0	12	1347.69	3.0343e-61	244.26	69615000000	119	NDLRDTFAALGR	P51667;E9Q8Y0;F6RBQ5;D3YUI7;D3YW14;D3Z0I3	Myl2	Myosin regulatory light chain 2, ventricular/cardiac muscle isoform	1186;350
192370000	50324000	28988000	34915000	7147500	1407100000	822080000	31238000	28973000	1056800000	3807300	195870000	142060000	0	290480000	49759000	0	136540000	36068000	135310000	589290000	20477000	50340000	464680000	1	1	20	2513.21	0	471.96	69361000000	277	QFLEELLTTQCDRFSQEEIK	P97457	Mylpf	Myosin regulatory light chain 2, skeletal muscle isoform	1425
0	417700000	553780000	40012000	361680000	12044000	1113800000	1140900000	457950	819080000	0	138770000	752520000	0	604120000	131600000	0	226650000	146320000	100990000	395290000	68156000	115890000	465640000	1	1	9	1000.6	0.00026504	137.85	68811000000	121	RSTVAQLVK	Q03265;D3Z6F5	Atp5a1	ATP synthase subunit alpha, mitochondrial;ATP synthase subunit alpha	1456
823230	0	0	1991000	0	2594700	0	0	0	0	14595000	0	0	0	0	0	0	0	0	1146700	0	0	0	251870000	0	2	21	1995.01	1.4494e-210	309.01	68653000000	383	TLAFLFSGGQAAEAEGGGGKK	Q5SX39	Myh4	Myosin-4	1607
31989000	0	77265000	8468200	248510000	189960000	513870000	43343000	43112000	151570000	7775900	0	285530000	93549000	51819000	34768000	13171000	87454000	17367000	80077000	13745000	37395000	30396000	210570000	0	1	16	1882.9	1.9807e-160	300.37	68541000000	430	LNFSHGTHEYHAETIK	P52480	Pkm	Pyruvate kinase PKM	1196
5935900	4488600	1940700000	1298300	15612000	1608600000	1616600000	4045900	17705000	2101500000	0	5598600	1058400000	80807000	730030000	402430000	346140000	342880000	456500000	346550000	893500000	176580000	614490000	1028500000	0	1	13	1218.66	1.3815e-05	124.42	68463000000	251	DFLAGGIAAAVSK	P48962	Slc25a4	ADP/ATP translocase 1	1158
0	0	0	0	0	0	0	0	0	0	0	0	0	3032800	321440000	44485000	97758000	0	1259500000	443220000	1348100000	69004000	618200000	1301100000	1	2	8	1034.55	0.00034486	161.28	68286000000	131	KREAEFQK	Q5SX39;Q91Z83;Q5SX40;Q02566;G3UW82	Myh4;Myh7;Myh1;Myh6;Myh2	Myosin-4;Myosin-7;Myosin-1;Myosin-6	1607;2210;655;1608;1453
0	0	0	0	0	0	0	0	0	0	0	0	0	0	0	83586000	41831000	137640000	0	0	0	185880000	0	0	0	1	8	868.502	0.0038863	113.5	68101000000	80	VIPELNGK	P16858;A0A0A0MQF6;S4R1W1;D3YYI5;S4R257;D3Z0Z9	Gapdh;Gm3839;Gm7293	Glyceraldehyde-3-phosphate dehydrogenase	975;2893;389
127210000	248090000	713490000	137920000	1012100000	618850000	1011200000	434330000	220650000	615360000	447740000	175810000	678350000	11353000	224130000	213710000	109310000	229630000	252070000	89907000	528710000	29219000	392630000	710800000	1	0	9	1016.51	1.5729e-15	187.82	67811000000	125	CNGVLEGIR	A2AQP0;Q5SX39;Q91Z83;Q5SX40;Q02566;B8JJH5;G3UW82;B1AR69;P13542;P13541;E9Q264;E9QPE7;Q8VDD5;Q5SV64;Q3UH59;Q61879;K3W4R2;Q6URW6	Myh7b;Myh4;Myh7;Myh1;Myh6;Myh2;Myh13;Myh8;Myh3;Myh15;Myh11;Myh9;Myh10;Myh14	Myosin-7B;Myosin-4;Myosin-7;Myosin-1;Myosin-6;Myosin-8;Myosin-3;Myosin-9;Myosin-10;Myosin-14	1607;2210;655;1608;945;1453;944;141;594;2131;97;1549;730;527
16687000	4178700	91350000	23248000	86648000	277590000	173600000	24596000	97808000	157860000	7096800	7769500	375640000	117610000	37730000	40417000	0	0	5314300	42371000	69756000	16859000	29566000	252510000	0	2	28	3116.55	0	398.31	67696000000	586	ALSDHHVYLEGTLLKPNMVTPGHACTQK	P05064;A6ZI44;Q9CPQ9;A6ZI46	Aldoa;Aldoart1	Fructose-bisphosphate aldolase A;Fructose-bisphosphate aldolase	870
0	0	0	0	0	0	0	0	0	0	0	0	77075000	0	247500000	187600000	439350000	77276000	221100000	166960000	290480000	66461000	171940000	1127600000	1	1	10	1223.61	1.2695e-32	240.85	67535000000	215	TKYETDAIQR	Q5SX39;Q91Z83;Q5SX40;Q02566;G3UW82;B1AR69;P13542;P13541	Myh4;Myh7;Myh1;Myh6;Myh2;Myh13;Myh8;Myh3	Myosin-4;Myosin-7;Myosin-1;Myosin-6;Myosin-8;Myosin-3	1607;2210;655;1608;945;1453;944;141
95297000	127490000	0	135830000	0	0	0	0	0	0	439960000	103320000	0	0	432810000	80745000	123250000	148440000	158520000	125810000	682280000	24375000	139100000	698490000	0	1	7	852.416	0.010113	119.22	67083000000	92	AIYNNMK	Q8R429;O55143;J3KMM5;B1ATS4;B1ATS5;E9Q559;Q64518	Atp2a1;Atp2a2;Atp2a3	Sarcoplasmic/endoplasmic reticulum calcium ATPase 1;Sarcoplasmic/endoplasmic reticulum calcium ATPase 2;Calcium-transporting ATPase;Sarcoplasmic/endoplasmic reticulum calcium ATPase 3	2098;803;148
19070000	0	184010000	0	204890000	215440000	13506000	0	0	221060000	23274000	0	150560000	27347000	0	13458000	17601000	137410000	9074700	18812000	115480000	0	18976000	340020000	0	2	7	905.522	0.0056887	120.49	66689000000	241	IEEIFKK	P07310	Ckm	Creatine kinase M-type	884
0	12860000	21171000	10866000	38958000	3837700	10402000	12470000	14044000	9208000	10664000	4464700	5036400	0	1253900000	227080000	166090000	94849000	415650000	214640000	895720000	54124000	321830000	2455900000	1	1	11	1312.64	1.7156e-58	257.95	66361000000	307	KEQDTSAHLER	A2AQP0;Q5SX39;Q91Z83;Q5SX40;Q02566;G3UW82;B1AR69;M0QWL0;P13542;P13541	Myh7b;Myh4;Myh7;Myh1;Myh6;Myh2;Myh13;Myh8;Myh3	Myosin-7B;Myosin-4;Myosin-7;Myosin-1;Myosin-6;Myosin-8;Myosin-3	1607;2210;655;1608;945;1453;944;141;97
153600000	27427000	939200000	74526000	201520000	549480000	491410000	87161000	425300000	1075800000	60039000	144160000	87437000	13591000	261360000	74148000	5291800	0	102440000	104880000	506880000	0	109460000	114490000	3	0	29	3369.61	2.0916e-245	280.96	66309000000	225	IGIFSENEEVTDRAYTGREFDDLPLAEQR	Q8R429	Atp2a1	Sarcoplasmic/endoplasmic reticulum calcium ATPase 1	2098
1622700	0	0	1866400	0	0	0	3240200	0	0	0	0	844860	0	5712300	1497200	0	15598000	0	0	4253300	420840	195890	61959000	2	0	9	1037.61	3.0882e-08	187.99	66279000000	91	RITISHVGR	Q5XKE0	Mybpc2	Myosin-binding protein C, fast-type	1616
514560000	102430000	2364600000	61094000	68834000	2954200000	3161100000	1804700000	868360000	2841900000	66882000	1460500000	209770000	0	758560000	85071000	41504000	69075000	77480000	1404500000	3190100000	464210000	81965000	2521900000	0	1	10	989.539	0.00021547	106.62	66135000000	63	TEAGATLTVK	G3UW82	Myh2		655
818900	76924000	7019900	551270	44836000	85234000	489660000	835930	0	258770000	10455000	0	98957000	0	52040000	60252000	60854000	229100000	27218000	80492000	222360000	17286000	94632000	154300000	1	0	23	2424.15	0	361.03	65781000000	770	TASEMVLADDNFSTIVAAVEEGR	Q8R429;O55143;J3KMM5	Atp2a1;Atp2a2	Sarcoplasmic/endoplasmic reticulum calcium ATPase 1;Sarcoplasmic/endoplasmic reticulum calcium ATPase 2;Calcium-transporting ATPase	2098;803
40360000	245550000	165890000	870540	1027200000	1079000000	1097500000	118420000	0	1295800000	203680000	42282000	652920000	62924000	45973000	120280000	64088000	101120000	117870000	182500000	64935000	11952000	120910000	431060000	2	0	11	1384.78	4.2475e-133	305.74	65406000000	309	LASELLEWIRR	O88990;Q9JI91	Actn3;Actn2	Alpha-actinin-3;Alpha-actinin-2	843;2684
0	0	0	0	0	0	0	0	0	0	749270	0	0	18488000	20740000	28862000	25878000	0	14868000	62481000	16062000	63148000	20074000	5000400	0	2	13	1259.64	8.4926e-14	162.52	65264000000	215	TLLAAGDKDGDGK	P32848	Pvalb	Parvalbumin alpha	1079
19276000	931710000	23848000	228470000	1465900000	31759000	14738000	8513900	0	24187000	350500000	12958000	1263800000	0	0	847830000	589120000	105680000	2167500000	40670000	24117000	76701000	2021900000	43837000	2	1	21	2399.25	4.4241e-126	232.79	65190000000	140	LVIIEGDLERTEERAELAESK	E9Q7Q3;D3Z6I8;D3YVR0;P21107	Tpm3	Tropomyosin alpha-3 chain	1007;551
26002000	37433000	136020000	0	741930000	0	0	0	104650000	0	261320000	33878000	103220000	0	602050000	243360000	15947000	236060000	202390000	137780000	237690000	0	0	296480000	1	0	8	1027.5	4.4508e-06	185.47	65122000000	150	EFTLEFSR	Q8R429;O55143;J3KMM5;B1ATS4;B1ATS5;E9Q559;Q64518	Atp2a1;Atp2a2;Atp2a3	Sarcoplasmic/endoplasmic reticulum calcium ATPase 1;Sarcoplasmic/endoplasmic reticulum calcium ATPase 2;Calcium-transporting ATPase;Sarcoplasmic/endoplasmic reticulum calcium ATPase 3	2098;803;148
33047000	38014000	64769000	39358000	255340000	137800000	312230000	65822000	74267000	181800000	8052800	10946000	46142000	21528000	27186000	0	19510000	40633000	790970	14026000	0	9498700	8489300	30724000	1	1	16	1852.96	0	336.23	64788000000	266	LLSYVDDEAFIRDVAK	Q9WUB3;E9PUM3	Pygm	Glycogen phosphorylase, muscle form;Alpha-1,4 glucan phosphorylase	2793
269920000	285050000	1013900000	0	18579000	1052900000	884490000	779760000	523290000	909770000	425580000	253750000	782080000	46916000	378030000	276010000	104810000	308690000	313550000	19803000	696740000	112270000	347270000	739290000	1	0	19	1987.03	9.9729e-34	202.84	63947000000	279	AIAELGIYPAVDPLDSTSR	P56480	Atp5b	ATP synthase subunit beta, mitochondrial	1231
15891000	856480000	50628000	797740000	2253600000	86122000	49609000	94202000	36316000	29984000	1442600000	32709000	1939200000	15412000	0	1746200000	122260000	0	2299700000	120890000	45056000	42680000	1597600000	38095000	1	1	23	2601.3	0	441.91	63897000000	164	DFELNALNARIEDEQALGSQLQK	Q91Z83	Myh7	Myosin-7	2210
788220000	54741000	2507400000	29769000	88852000	223120000	58289000	62519000	163020000	3569500000	44396000	0	229140000	0	3128800000	71149000	62962000	3450700000	56193000	120980000	238900000	102110000	71291000	443260000	1	1	13	1557.76	1.8662e-117	287.54	63742000000	221	VRELEGEVENEQK	Q5SX40;P13542	Myh1;Myh8	Myosin-1;Myosin-8	1608;945
0	0	0	385410000	4331500000	375720000	0	0	45562000	0	1693600000	47427000	4591300000	58359000	86775000	1297600000	471490000	274050000	1396500000	54590000	74294000	33003000	1260800000	69222000	0	1	11	1244.62	1.0949e-25	218.55	63399000000	58	AAVEQLTEEQK	P19123;E9Q8P0	Tnnc1	Troponin C, slow skeletal and cardiac muscles	996
41420000	576900000	305220000	103270000	2605000000	612050000	4756700000	1524000000	55202000	416450000	1008900000	52026000	1084500000	20026000	51570000	1110500000	45410000	0	1270200000	51523000	243710000	48731000	1721300000	66270000	2	0	14	1681.81	5.9716e-60	219.84	63158000000	105	ADYVREMLTTQAER	P51667;E9Q8Y0;D3YUI7	Myl2	Myosin regulatory light chain 2, ventricular/cardiac muscle isoform	1186;350
0	1553700000	3780400	136910000	2465800000	1467400	55595000	56308000	0	19707000	1799500000	27145000	351210000	0	12635000	1595600000	545320000	18172000	2071600000	75014000	44857000	49733000	1387000000	26500000	1	2	18	2015.05	0	372.09	63133000000	217	KGSSFQTVSALHRENLNK	Q91Z83;Q02566;B8JJH5	Myh7;Myh6	Myosin-7;Myosin-6	2210;1453
0	0	3321600000	38113000	36726000	23978000	3655600000	2578300000	1156800000	16854000	0	0	0	31485000	1537500000	36657000	20286000	77346000	32200000	1581200000	1571000000	83126000	34548000	4446200000	1	0	10	1152.54	1.4548e-11	176.95	63092000000	70	LQTESGEFSR	G3UW82	Myh2		655
1145300000	89077000	1613100000	43072000	0	298950000	55694000	0	290350000	2634700000	88883000	0	173820000	67008000	1969500000	74868000	0	1585100000	52580000	122030000	317750000	66932000	99392000	298840000	0	1	14	1532.82	1.3816e-53	209.87	62959000000	114	AAYLQNLNSADLLK	Q5SX40	Myh1	Myosin-1	1608
0	0	0	0	0	0	0	0	0	0	0	0	0	0	0	0	0	0	0	0	0	0	0	0	1	2	17	2073.07	0	373.09	62852000000	217	TKEEEQQRLINELSTQK	Q5SX39	Myh4	Myosin-4	1607
71423000	193480000	187930000	0	461280000	563120000	247930	174940000	76308000	0	329250000	60283000	178480000	36513000	206280000	174700000	98904000	229040000	151710000	198200000	142960000	64190000	158660000	649600000	1	0	8	992.446	0.00010586	150.62	62680000000	196	ASFNHFDR	O88990;Q9JI91;A1BN54;Q7TPR4	Actn3;Actn2;Actn1	Alpha-actinin-3;Alpha-actinin-2;Alpha-actinin-1	843;2684;32
0	6626000	16196000	0	44429000	18343000	64337000	30593000	7933300	14298000	0	2506500	42120000	29615000	0	9261000	4707500	14785000	8876600	19494000	15643000	6346900	0	28649000	0	1	30	3042.55	0	452.61	62166000000	2902	TVPPAVTGVTFLSGGQSEEEASINLNAINK	P05064;A6ZI44	Aldoa	Fructose-bisphosphate aldolase A;Fructose-bisphosphate aldolase	870
56368000	4954800	0	0	0	544650000	374800000	0	59388000	404300000	0	108060000	13429000	4456900	71536000	0	0	319800000	13754000	65762000	541640000	43161000	0	275350000	2	1	38	4220.06	0	456.72	62070000000	689	RQEAPPHIFSISDNAYQFMLTDRENQSILITGESGAGK	Q5SX39;Q5SX40;G3UW82;P13542;P13541	Myh4;Myh1;Myh2;Myh8;Myh3	Myosin-4;Myosin-1;Myosin-8;Myosin-3	1607;655;1608;945;944
5940500	812540000	10474000	402420000	1957600000	82944000	93648000	39755000	9272900	16455000	961420000	9276600	1631600000	0	9095500	625060000	232820000	0	778080000	80629000	0	4472200	989370000	0	2	0	16	1994.98	0	386.69	61863000000	351	HRLQNEIEDLMVDVER	Q91Z83;Q02566	Myh7;Myh6	Myosin-7;Myosin-6	2210;1453
2628200	2266800	1278900000	167450000	854100000	13836000	1603100000	783720000	453880000	1157600000	348450000	355110000	864510000	0	525450000	327950000	0	217950000	353900000	263470000	689210000	128380000	389850000	729920000	0	1	11	1286.69	6.1481e-51	237.84	61834000000	182	HALIIYDDLSK	Q03265;D3Z6F5	Atp5a1	ATP synthase subunit alpha, mitochondrial;ATP synthase subunit alpha	1456
35330000	62026000	723420000	68376000	152910000	525750000	543410000	60570000	364260000	1280100000	18284000	203040000	207620000	0	218340000	161630000	21613000	38442000	145740000	214900000	597100000	54893000	85817000	213280000	2	0	10	1189.58	3.5718e-11	179.31	61687000000	217	EWGTGRDTLR	Q8R429	Atp2a1	Sarcoplasmic/endoplasmic reticulum calcium ATPase 1	2098
0	0	0	0	0	0	0	0	0	0	0	0	0	256360000	0	0	107120000	65741000	0	0	0	219530000	86410000	350380000	0	1	8	950.471	0.0016497	130.56	61625000000	62	AAQEEYIK	P05064;A6ZI44;Q9CPQ9;A6ZI46	Aldoa;Aldoart1	Fructose-bisphosphate aldolase A;Fructose-bisphosphate aldolase	870
449120000	41666000	1361500000	56189000	174060000	1224900000	302220000	0	0	1409100000	298740000	450450000	253860000	13603000	634790000	47344000	7323700	28056000	153720000	10877000	946480000	39706000	16612000	334160000	1	0	10	1161.58	1.9557e-20	193.82	61611000000	144	EVTGSIQLCR	Q8R429	Atp2a1	Sarcoplasmic/endoplasmic reticulum calcium ATPase 1	2098
74890000	240290000	897750000	40908000	851990000	955110000	1455300000	717080000	173630000	2305100000	372690000	29076000	1172100000	0	199900000	442110000	136060000	308970000	942440000	227330000	917270000	64148000	876830000	1869700000	0	2	11	1209.71	3.0891e-17	175.74	61164000000	232	KHTLIIEGATK	Q6P6L5;D3YU50;F6RQD1	Mybpc1		1749;346;611
0	0	0	0	0	0	0	0	0	0	0	0	0	11093000	20161000	8292400	3738400	0	7146200	15318000	13888000	14928000	10862000	287020000	0	1	10	1142.59	1.186e-11	174.86	61016000000	72	VLAVNQENEK	O88990	Actn3	Alpha-actinin-3	843
378850000	262680000	796140000	54056000	112800000	1213200000	364030000	619270000	335300000	539480000	115920000	43494000	320490000	139040000	225550000	304880000	184540000	164050000	208190000	307310000	410420000	234860000	360140000	457780000	0	1	16	1818.87	4.9215e-81	246.38	60897000000	507	TYFPHFDVSHGSAQVK	Q91VB8;P01942	haemaglobin alpha 2;Hba	Hemoglobin subunit alpha	2166
0	1328400	0	749210	2594200	90914000	111220000	0	0	35638000	0	0	99937000	39356000	24028000	5586900	14956000	46006000	7130000	26431000	26653000	17944000	10269000	60311000	0	2	29	3028.58	0	430.37	60802000000	464	ELASQPDVDGFLVGGASLKPEFVDIINAK	P17751;H7BXC3	Tpi1	Triosephosphate isomerase	988
134810000	140580000	774970000	139570000	305770000	1119500000	2623400000	358400000	188690000	682690000	252920000	121990000	817710000	529990000	383540000	430480000	172500000	50851000	200900000	501070000	385140000	382200000	406120000	363360000	1	1	12	1359.75	5.625e-37	225.89	60621000000	296	ALELFRNDIAAK	P04247	Mb	Myoglobin	866
112530000	54337000	811600000	42591000	114050000	381990000	523940000	0	273810000	909990000	0	0	157830000	1202900	305810000	40233000	0	146630000	44939000	116260000	369100000	0	70742000	1347600000	1	0	13	1507.72	2.9092e-66	250.16	60548000000	125	IGIFSENEEVTDR	Q8R429	Atp2a1	Sarcoplasmic/endoplasmic reticulum calcium ATPase 1	2098
656880000	49522000	2007600000	28758000	34702000	4848600000	2321700000	2086100000	1139500000	1740200000	16043000	27838000	137450000	0	1754200000	18407000	0	0	0	0	3052000000	49919000	0	4896800000	1	0	9	1072.59	1.2722e-21	193.1	60441000000	49	LINDLTTQR	G3UW82	Myh2		655
0	1123100000	13756000	690640000	1544500000	24241000	61427000	33774000	11978000	19500000	828580000	0	2411200000	0	20616000	1104600000	443450000	0	851270000	46683000	34363000	22480000	851350000	20997000	2	0	9	1098.61	5.7794e-49	234.99	60378000000	66	ENIAIVERR	Q91Z83;Q02566	Myh7;Myh6	Myosin-7;Myosin-6	2210;1453
17859000	29743000	95484000	18534000	132460000	173840000	370970000	77315000	4201700	135300000	0	20060000	156870000	28599000	51106000	28777000	17936000	26682000	17518000	41237000	60998000	27290000	26106000	107540000	1	0	14	1555.77	4.0171e-69	231.06	60350000000	745	VVIGMDVAASEFYR	P21550;J3QPZ9	Eno3	Beta-enolase;Enolase	1013
74516000	78547000	571370000	47222000	711770000	565060000	742050000	300600000	223110000	545960000	176470000	67587000	369660000	7892600	168800000	68138000	14303000	164640000	64214000	26331000	349170000	0	87941000	348410000	1	0	14	1405.67	2.908e-77	246.64	60303000000	400	AHGGYSVFAGVGER	P56480	Atp5b	ATP synthase subunit beta, mitochondrial	1231
0	0	934340000	59659000	0	804070000	1189100000	410600000	275710000	981240000	108100000	114820000	0	29672000	286880000	94306000	35629000	156360000	101570000	96223000	229610000	45798000	107920000	272730000	0	1	19	1792.08	2.9623e-196	260.31	60244000000	292	VAVLGASGGIGQPLSLLLK	P08249	Mdh2	Malate dehydrogenase, mitochondrial	900
0	680800000	19019000	699950000	1368400000	45736000	0	0	0	31874000	1473900000	0	1986800000	0	0	1214100000	636100000	0	1305400000	0	0	66215000	1622000000	0	0	1	11	1304.63	1.2871e-47	244.64	60047000000	58	QLEDELATMQK	E9Q5J9;Q8K0Z5;P21107	Tpm3	Tropomyosin alpha-3 chain	1007;541
129170000	115740000	2500500000	0	474190000	2077100000	2891900000	832410000	2369800	2225100000	185180000	177640000	455270000	23428000	284420000	105140000	51374000	259190000	128530000	135160000	220900000	39828000	166250000	519060000	0	1	23	2321.25	4.4087e-241	335.07	59968000000	380	ISVAGVTSGNVGYLAHAIHQVTK	P05202	Got2	Aspartate aminotransferase, mitochondrial	873
0	194410000	73639000	861450000	139670000	99867000	1212500000	14772000	31675000	1148700000	261810000	0	26813000	1084600000	2643100000	96136000	237360000	0	170670000	370040000	200020000	275490000	163830000	354200000	0	1	9	1064.51	6.2106e-08	180.27	59855000000	91	AQYEDIAQK	Q3UV17	Krt76	Keratin, type II cytoskeletal 2 oral	1570
187650000	168520000	1257700000	40798000	593920000	1137300000	636460000	548190000	239360000	1556800000	121960000	82498000	554150000	33998000	283170000	144770000	2112000	80217000	107540000	57891000	468400000	31239000	97436000	697670000	0	1	16	1959.9	0	361.06	59771000000	524	YPIEHGIITNWDDMEK	P68033;P62737;P63268;D3YZY0;D3Z2K3;P68134	Actc1;Acta2;Actg2;Acta1	Actin, alpha cardiac muscle 1;Actin, aortic smooth muscle;Actin, gamma-enteric smooth muscle;Actin, alpha skeletal muscle	1367;1364;1310
0	25501000	57518000	16652000	220920000	93216000	200390000	0	0	47184000	0	0	165890000	136860000	86805000	59781000	42481000	94528000	9714800	97686000	104770000	93717000	24809000	236550000	1	0	11	1149.66	3.8504e-71	217.02	59707000000	238	VLIAAHGNSLR	Q9DBJ1;O70250	Pgam1;Pgam2	Phosphoglycerate mutase 1;Phosphoglycerate mutase 2	808;2607
1908400	0	0	0	0	0	7234200	4210400	0	0	0	0	0	0	0	2903800	0	0	0	0	4294700	0	0	50205000	1	1	26	2941.41	0	442.42	59701000000	749	NDLQLQVQAEADGLADAEERCDQLIK	Q5SX39	Myh4	Myosin-4	1607
209380000	367710000	910820000	84861000	1052900000	1908700000	1277800000	496050000	417440000	1869100000	374480000	105240000	1012500000	45605000	157340000	657330000	153790000	155520000	607060000	339000000	195250000	226870000	278910000	612180000	2	1	16	1886.06	6.7549e-72	226.79	59391000000	336	ILASDKPYILAEELRR	Q9JI91	Actn2	Alpha-actinin-2	2684
37957000	5120200	2394300	46704000	153210000	256950000	455320000	82236000	3678200	129930000	47205000	1911200	241570000	124750000	74252000	47132000	31514000	75143000	24628000	91024000	77886000	51310000	68825000	10219000	0	1	15	1601.88	9.4025e-37	153.09	59122000000	322	VVLAYEPVWAIGTGK	P17751;H7BXC3	Tpi1	Triosephosphate isomerase	988
292350000	204850000	0	197600000	681740000	1996600000	1856000000	558670000	365180000	0	515950000	370100000	425290000	48892000	915570000	292360000	103810000	0	355570000	322500000	1011600000	194280000	473950000	1734200000	1	0	10	1037.59	1.6193e-12	176.33	58734000000	108	IPVGPETLGR	P56480	Atp5b	ATP synthase subunit beta, mitochondrial	1231
19590000	1855100000	51594000	658710000	0	124720000	154770000	149820000	37628000	32739000	1327100000	18103000	2400200000	0	0	1144300000	0	0	2415800000	64333000	34031000	0	1688200000	0	2	0	15	1815.88	6.2325e-70	240.59	58667000000	43	IEELEEEIEAERATR	P13541	Myh3	Myosin-3	944
188050000	132930000	404780000	28089000	1022800000	1350700000	1462200000	783080000	361830000	1745600000	276150000	215260000	812440000	25399000	415720000	303710000	57157000	710650000	215980000	242340000	1101100000	31372000	403670000	844290000	0	1	19	2118.04	3.1086e-135	275.68	58394000000	434	SLQDIIAILGMDELSEEDK	P56480	Atp5b	ATP synthase subunit beta, mitochondrial	1231
19562000	0	24186000	0	0	122710000	0	0	0	22190000	0	0	0	11585000	97162000	21351000	4031200	7558000	37511000	0	88218000	0	0	202480000	2	0	10	1289.67	5.839e-26	202.34	58322000000	171	NYITPEELRR	O88990	Actn3	Alpha-actinin-3	843
2068600	269500000	12409000	413460000	939740000	0	40934000	31577000	13852000	10585000	988580000	12788000	692770000	11494000	8045100	622280000	365200000	0	662990000	24395000	11378000	42796000	666130000	22111000	2	0	15	1815.88	3.1779e-206	329.41	58121000000	79	IEELEEELEAERTAR	Q91Z83;Q02566	Myh7;Myh6	Myosin-7;Myosin-6	2210;1453
0	0	90325000	24073000	89043000	188440000	304400000	81921000	85825000	87743000	0	0	160350000	59074000	35336000	22023000	14504000	21580000	11262000	58851000	44117000	0	47565000	93854000	0	1	16	1620.82	1.9893e-126	287.78	57856000000	217	VTNGAFTGEISPGMIK	P17751	Tpi1	Triosephosphate isomerase	988
103060000	136350000	488520000	49841000	620760000	627610000	551650000	405120000	203370000	663500000	264970000	126530000	526070000	12451000	324450000	253590000	40788000	121890000	243090000	53746000	391470000	12934000	288540000	367460000	1	1	15	1720.86	1.8822e-130	290.95	57807000000	333	GTQEITGDDRFELIK	E9Q8K5;E9Q8N1;A2ASS6	Ttn	Titin	98;554
466480000	83779000	1610600000	13566000	23629000	4661900000	2702300000	728570000	389250000	1912200000	26876000	764640000	75405000	39276000	402100000	22287000	56667000	230370000	28924000	627500000	841330000	79353000	35361000	3006500000	1	0	11	1166.62	2.6953e-38	233.45	57672000000	180	NALAHALQSSR	Q02566;G3UW82;B1AR69;P13542;P13541	Myh6;Myh2;Myh13;Myh8;Myh3	Myosin-6;Myosin-8;Myosin-3	655;945;1453;944;141
0	140910000	102730000	51598000	747810000	1171900000	625090000	81123000	70465000	596110000	154340000	7130800	431370000	142900000	84669000	131310000	7275200	109010000	194580000	135640000	144260000	129630000	105390000	287050000	0	2	13	1423.77	5.7264e-65	247.3	57613000000	315	DSALSTHKPIEVK	E9PYJ9	Ldb3		496
225010000	360870000	933870000	133350000	1220400000	2298000000	1585300000	473710000	65840000	1556200000	638890000	145580000	1226800000	143060000	130580000	245500000	166550000	159870000	479420000	248700000	216910000	157970000	352930000	499290000	1	1	16	1841.88	4.3723e-273	352.77	57459000000	369	MLDAEDIVNTPKPDER	Q9JI91	Actn2	Alpha-actinin-2	2684
0	747460000	58222000	691640000	1512500000	194310000	165390000	127200000	19607000	111740000	0	0	3867600000	11115000	39709000	1543400000	515410000	0	1805500000	85215000	26232000	34794000	779930000	22291000	2	0	7	917.475	2.8092e-14	182.09	57301000000	61	VRMDLER	Q91Z83;B2RPU2;Q02566;B8JJH5	Myh7;Plekhd1;Myh6	Myosin-7;Pleckstrin homology domain-containing family D member 1;Myosin-6	2210;1453
164950000	17283000	577710000	8295900	19520000	493480000	445900000	471700000	207910000	703930000	12697000	157190000	63884000	0	309180000	18950000	2391200	0	9874800	48017000	605410000	0	16984000	285490000	1	1	13	1584.76	8.0599e-145	303.7	57250000000	246	EAFLLFDRTGECK	P05977;E0CZ30;E9PWG4	Myl1	Myosin light chain 1/3, skeletal muscle isoform	875;477
128610000	140660000	432730000	118560000	285710000	870120000	540970000	284180000	296870000	82005000	129450000	153340000	970650000	295490000	35326000	11844000	5225400	418430000	3163700	42217000	32327000	18746000	165430000	109430000	1	0	14	1538.78	3.3553e-165	314.59	57218000000	247	DLGATWVVLGHSER	P17751;H7BXC3	Tpi1	Triosephosphate isomerase	988
0	7504400	0	125820000	651430000	30820000	0	0	18682000	0	1754900000	0	621060000	0	2220000	1151400000	995190000	0	1187600000	0	0	0	1384700000	0	1	0	7	882.46	0.0070056	124.37	57074000000	41	ILYGDFR	Q91Z83;Q02566;B8JJH5	Myh7;Myh6	Myosin-7;Myosin-6	2210;1453
0	0	1530000000	0	1225800000	0	811950000	0	1430600000	1215200000	0	0	2370700000	1256400000	1356800000	0	0	0	0	0	0	0	0	0	0	3	17	1594.9	0.06078	53.168	57056000000	4	KAPGVAAAVAEDAGLKK	Q9CXV9	Dcun1d5	DCN1-like protein 5	2437
4209500	601610000	118870000	299460000	4998200000	144980000	326070000	19006000	9751200	120200000	590850000	19126000	1653200000	10625000	5447500	657380000	225960000	20452000	674660000	52743000	23635000	16616000	758690000	6536000	1	1	15	1895.95	2.3081e-115	277	57032000000	227	AERDYHIFYQILSNK	Q91Z83	Myh7	Myosin-7	2210
161180000	344580000	306710000	110510000	1454900000	1902600000	1494900000	597080000	435290000	1550600000	526080000	113050000	1634700000	108270000	227360000	395070000	26165000	250020000	461150000	146090000	335820000	91738000	346750000	800520000	0	1	14	1668.91	4.6989e-102	271.8	56922000000	353	LLETIDQLHLEFAK	Q9JI91	Actn2	Alpha-actinin-2	2684
58516000	5928100	246770000	5254100	0	471220000	457340000	277360000	148660000	205930000	5912300	150020000	62086000	13292000	136120000	4834600	0	880050000	2984200	176430000	364100000	23821000	7897100	677870000	1	0	11	1295.65	1.1129e-127	294.29	56857000000	268	DTQLHLDDALR	Q5SX39;Q5SX40;G3UW82;P13542;P13541	Myh4;Myh1;Myh2;Myh8;Myh3	Myosin-4;Myosin-1;Myosin-8;Myosin-3	1607;655;1608;945;944
227390000	0	0	0	0	0	0	0	0	3047800000	0	0	1079300	96875000	10519000	216390000	119550000	136760000	209090000	513110000	2634700000	164710000	149260000	3161900000	0	1	7	756.402	0.01165	116.54	56848000000	79	VLDPEGK	P97457	Mylpf	Myosin regulatory light chain 2, skeletal muscle isoform	1425
10792000	21156000	41403000	7657800	144100000	2773100	208700000	48118000	48530000	72888000	15709000	7672400	119810000	31621000	9741100	14718000	0	11831000	4352000	21355000	20545000	9294100	15394000	5001300	0	1	27	3019.5	0	349.24	56728000000	363	YASICQQNGIVPIVEPEILPDGDHDLK	P05064;A6ZI44;D3YWI1;P05063	Aldoa;Aldoc	Fructose-bisphosphate aldolase A;Fructose-bisphosphate aldolase;Fructose-bisphosphate aldolase C	870
296530000	208710000	1467800000	0	257490000	1405600000	1609600000	470910000	521410000	2237500000	257440000	155320000	462710000	69373000	491010000	205620000	93028000	397090000	222280000	226280000	685720000	100800000	287920000	890340000	1	0	22	2392.24	0	420.95	56431000000	357	LTLYDIAHTPGVAADLSHIETR	P08249	Mdh2	Malate dehydrogenase, mitochondrial	900
24121000	5714900	21362000	6788000	7504200	13342000	5368400	16315000	17918000	10611000	0	4531400	15128000	7294000	8691100	4515000	0	17129000	9652300	9463500	9004700	11872000	0	235140000	1	1	22	2569.28	1.0233e-295	339.67	56366000000	336	SNIDRLEGDHQLLQESLVFDNK	O88990	Actn3	Alpha-actinin-3	843
260950000	275360000	1548600000	138650000	979490000	1307400000	1342200000	691300000	451120000	1335600000	388160000	261830000	700620000	42977000	395410000	264390000	69641000	281940000	256910000	251040000	703490000	66188000	362930000	718150000	1	1	20	2317.14	5.5622e-282	350.58	56196000000	505	TREGNDLYHEMIESGVINLK	P56480	Atp5b	ATP synthase subunit beta, mitochondrial	1231
101000000	237990000	853060000	127280000	0	1413000000	1269000000	0	201000000	1148700	489220000	0	1154000000	11512000	295320000	422530000	265170000	306390000	381810000	186530000	848690000	33020000	624080000	903030000	0	1	8	973.49	0.0018821	128	56119000000	140	CLIPNETK	Q5SX39;B1AR69	Myh4;Myh13	Myosin-4	1607;141
828600000	29353000	2798100000	59734000	52502000	1852800000	1880500000	1349300000	832040000	1213900000	47525000	220550000	112330000	40411000	498790000	13252000	21803000	411170000	28417000	601130000	1587400000	113310000	43845000	1018000000	1	1	19	2175.02	4.0528e-252	331.8	55967000000	623	EVTERAEDEEEINAELTAK	Q5SX40;G3UW82;P13542;P13541	Myh1;Myh2;Myh8;Myh3	Myosin-1;Myosin-8;Myosin-3	655;1608;945;944
15282000	6242700	21108000	10271000	12146000	24367000	0	13413000	17287000	17639000	23400000	8453100	19797000	14077000	16212000	0	7606000	33426000	4315100	16181000	16671000	13388000	10849000	329190000	1	0	12	1414.74	1.8716e-75	255.63	55304000000	175	TINEVENQVLTR	O88990	Actn3	Alpha-actinin-3	843
0	0	753330000	0	0	53373000	7310700	15343000	51409000	2363600000	0	16888000	55961000	39070000	2407700000	8041400	25121000	2869300000	6056300	98167000	108480000	18895000	9863500	272080000	1	0	11	1139.6	4.2374e-51	236.34	55099000000	184	SALAHALQSSR	Q5SX40	Myh1	Myosin-1	1608
275100000	342440000	1584600000	0	657870	877940000	1126800000	0	857460000	778300000	193760000	131220000	950670000	87100000	534600000	294040000	199390000	275670000	367360000	272700000	594340000	124320000	322190000	608880000	0	1	9	977.518	1.9271e-05	148.32	55011000000	139	GDQALSFLK	P48962	Slc25a4	ADP/ATP translocase 1	1158
0	0	19269000	0	16409000	34196000	7962400	14359000	0	0	10129000	0	0	0	6221700	0	0	37340000	0	14660000	0	9644600	2781400	246020000	0	2	16	1813.88	4.1071e-178	311.08	54858000000	281	MLDAEDIVNTPKPDEK	O88990	Actn3	Alpha-actinin-3	843
0	877980000	1318900000	346250000	1076500000	2640100000	1050800000	472630000	625830000	1439100000	290990000	3368900	2846300000	467870000	16331000	4669200	567990	0	0	15177000	33112000	0	653660	58684000	0	1	7	897.474	0.00010721	145.04	54773000000	72	VCLLHEK	P07724	Alb	Serum albumin	886
204480000	3717200	1112800000	12928000	22510000	347470000	318480000	8070200	153060000	508120000	10822000	141420000	88525000	8109100	98172000	30138000	0	19650000	28536000	3459500	4434800	28125000	18431000	65974000	1	2	26	3002.45	0	533.66	54647000000	339	KLETDISQIQGEMEDIVQEARNAEEK	Q5SX39;Q5SX40;G3UW82	Myh4;Myh1;Myh2	Myosin-4;Myosin-1	1607;655;1608
0	1555600	0	0	4301700	0	0	0	0	0	2006900	0	488500000	0	79193000	47931000	33106000	65309000	30591000	81770000	72820000	63271000	55801000	130330000	0	1	10	1148.61	1.0541e-05	125.74	54631000000	112	LVQEVTDFAK	P07724	Alb	Serum albumin	886
3471900	600870000	67383000	54396000	3770300000	179550000	74867000	11368000	0	58494000	362310000	12510000	1979500000	24282000	0	1012900000	334620000	114200000	1301500000	25635000	17471000	31490000	1468800000	56461000	1	1	14	1692.82	3.2202e-49	213.73	54240000000	153	VEVVDEERYDIEAK	D3YUN3;F6QC77;Q9WUZ5	Tnni1	Troponin I, slow skeletal muscle	352
0	0	1273800000	0	39716000	429290000	3483900000	5160600	1238900	1621900000	0	320420000	0	395680	914760000	0	0	0	0	514430000	2435000000	0	0	2357400000	1	1	10	1205.65	3.4742e-20	196.44	54181000000	72	NYRNTQGILK	Q5SX40;G3UW82;P13542	Myh1;Myh2;Myh8	Myosin-1;Myosin-8	655;1608;945
216630000	86927000	0	84868000	674230000	1354100000	953110000	0	453180000	0	390840000	268490000	595330000	0	466880000	110490000	0	287610000	120700000	190500000	768100000	0	219630000	1171900000	0	1	9	1072.57	3.4413e-05	148.52	54093000000	103	EEEELIALK	E9Q688;O88346;J3QPC8;E9QA86;E9Q0G9;E9PZB4;E9PVN9;A2A6J1;A2A6I8;A2A6H6;Z4YKF8;Z4YKG3;Z4YKG8;Z4YJU0;Z4YNB2;Q9QZ47;Z4YKH8;Z4YKE7;J3QP61;A2A6I3;A2A6J0	Tnnt1;Tnnt3	Troponin T, slow skeletal muscle;Troponin T, fast skeletal muscle	543;43;42;41
4332800	7951600	5453200	0	0	2328700	11382000	1212500	18931000	10536000	5722300	0	1541100	0	5312900	8280400	0	3283900	0	15749000	8184400	0	10293000	58159000	0	2	8	998.591	1.2365e-05	158.87	54016000000	192	KVFHILDK	P32848	Pvalb	Parvalbumin alpha	1079
234960000	0	552030000	0	872320	592390000	2169100000	63900000	190760000	631660000	0	240680000	73982000	14080000	272240000	17072000	2403800	647190000	7644600	309570000	1465000000	24580000	45710000	973000000	3	0	21	2482.31	0	392.4	53950000000	277	RANLLQAEIEELRATLEQTER	Q5SX40;G3UW82;P13542	Myh1;Myh2;Myh8	Myosin-1;Myosin-8	655;1608;945
50074000	85463000	893800000	37719000	853400000	992170000	1122400000	529430000	156360000	1072000000	134780000	1960700	509870000	6202600	174760000	121470000	69009000	306770000	215530000	103870000	723320000	10295000	204400000	732490000	2	0	14	1437.84	3.269e-88	259.68	53907000000	249	GIRPAINVGLSVSR	Q03265;D3Z6F5	Atp5a1	ATP synthase subunit alpha, mitochondrial;ATP synthase subunit alpha	1456
0	0	0	0	0	0	1000900000	0	0	364350	0	0	0	51073000	966570000	45736000	39380000	0	21870000	475280000	1370500000	75586000	34474000	1644400000	0	1	8	1005.44	0.0029252	122.74	53848000000	102	ELEDMNQK	P13412;A2A6J8;A2A6K0	Tnni2	Troponin I, fast skeletal muscle	943
0	0	949990000	33933000	654630000	814190000	961570000	489540000	235400000	1083300000	152940000	108580000	486880000	0	280470000	111680000	48625000	159360000	24695000	86475000	465280000	10076000	187990000	639640000	0	2	20	2102.17	5.8622e-253	340.18	53494000000	296	VNNSSLIGLGYTQTLKPGIK	Q60932	Vdac1	Voltage-dependent anion-selective channel protein 1	1635
146230000	8150000	441140000	0	3860600	82476000	85150000	102180000	56092000	367020000	3287000	71231000	3942800	0	39064000	6867700	2131700	7443800	6277200	7543400	236500000	7356200	2626400	13908000	1	1	21	2181.12	0	442.05	53405000000	292	EGNGTVMGAELRHVLATLGEK	P05977;A0A087WRZ7;E9PWG4	Myl1	Myosin light chain 1/3, skeletal muscle isoform	875;477
0	1242400	0	0	0	3870000	290470000	0	0	467590000	1180400	0	4086900	0	267680000	18161000	74185000	644260000	19006000	157500000	272340000	71823000	25900000	1092500000	0	1	7	879.434	0.004581	129.65	53161000000	88	FSQEEIK	P97457	Mylpf	Myosin regulatory light chain 2, skeletal muscle isoform	1425
10341000	6421700	16617000	0	13092000	19181000	7832900	0	0	21277000	0	0	38874000	7839000	8047800	11069000	0	0	7894500	0	0	0	0	30772000	2	1	28	3205.71	0	397.55	52983000000	223	RVAEQELLDASERVQLLHTQNTSLINTK	Q5SX39	Myh4	Myosin-4	1607
0	0	0	0	0	0	0	0	0	5852100	0	0	0	24379000	0	7715900	16086000	13484000	6099100	20850000	19437000	16865000	9205500	79560000	1	0	8	946.465	1.7183e-06	168.08	52766000000	60	NNVVNTMR	Q9WUB3;E9PUM3	Pygm	Glycogen phosphorylase, muscle form;Alpha-1,4 glucan phosphorylase	2793
0	0	0	0	0	0	0	0	0	0	0	0	0	0	32425000	0	0	0	0	0	0	0	0	0	0	1	7	790.401	0.016575	106.43	52567000000	57	NTQGMLK	Q5SX39	Myh4	Myosin-4	1607
176750000	10777000	837260000	7840900	14451000	680930000	900180000	560890000	283540000	743710000	15272000	233000000	34586000	3997700	367900000	3185800	4067700	187930000	2345900	144650000	550980000	6214800	17097000	1092600000	0	2	12	1372.74	8.4997e-90	264.09	52553000000	293	KDIDDLELTLAK	A2AQP0;Q5SX39;Q5SX40;Q02566;B8JJH5;G3UW82;P13542;P13541	Myh7b;Myh4;Myh1;Myh6;Myh2;Myh8;Myh3	Myosin-7B;Myosin-4;Myosin-1;Myosin-6;Myosin-8;Myosin-3	1607;655;1608;945;1453;944;97
0	0	1945600000	58106000	65834000	225230000	0	0	222810000	5036600000	0	0	202350000	93459000	4041700000	47639000	60782000	1248800000	36765000	152510000	379940000	105470000	57341000	401370000	0	1	13	1478.66	2.8354e-14	164.22	52506000000	151	LAQESTMDVENDK	Q5SX40	Myh1	Myosin-1	1608
167190000	300880000	371590000	187430000	670160000	801790000	534670000	448010000	178690000	565740000	440190000	295910000	30740000	15952000	435850000	115960000	33775000	0	262310000	40340000	589060000	32892000	289630000	475480000	0	1	12	1357.66	9.008e-108	284.67	52413000000	300	GSDQWTHISTVK	E9Q8K5;E9Q8N1;A2ASS6	Ttn	Titin	98;554
13394000	39995000	1626500000	25201000	6465000	154520000	0	60718000	192310000	2866300000	3547000	0	114430000	24879000	2182600000	22948000	25460000	2379000000	15781000	44162000	185700000	31509000	25775000	178610000	0	1	15	1693.79	1.3844e-91	273.94	52307000000	246	MEIDDLASNMEVISK	Q5SX40	Myh1	Myosin-1	1608
30912000	29145000	586770000	9867100	153760000	635070000	915700000	92753000	127170000	946070000	40728000	18217000	161740000	8088400	47872000	38287000	7660900	226140000	26008000	35620000	191710000	5352000	34867000	86727000	1	0	17	1845.95	6.9526e-176	305.35	52295000000	390	DMANPTALLLSAVMMLR	Q9D6R2	Idh3a	Isocitrate dehydrogenase [NAD] subunit alpha, mitochondrial	2540
17431000	25267000	46307000	22541000	85975000	111950000	159320000	53136000	56774000	48842000	20216000	25326000	166380000	92848000	44979000	25105000	17920000	33901000	17199000	43268000	45254000	39680000	30717000	92119000	0	1	12	1413.73	9.1905e-05	120.55	52275000000	147	ALPFWNEEIAPK	O70250	Pgam2	Phosphoglycerate mutase 2	808
0	1773500000	0	718750000	13280000	0	0	0	0	0	2574000000	0	3564600000	158190000	132910000	916640000	538320000	678980000	819540000	301220000	215990000	175670000	16835000	254330000	0	1	9	1119.51	0.00061912	117.01	52116000000	41	NEEIDEMIK	P51667;E9Q8Y0;F6RBQ5;D3YUI7;D3YW14;D3Z0I3	Myl2	Myosin regulatory light chain 2, ventricular/cardiac muscle isoform	1186;350
0	13531000	0	30156000	962520000	10721000	91038000	0	9244300	18420000	1895600000	0	750210000	0	0	1280600000	1090700000	4677200	1517900000	31766000	0	0	1480600000	12340000	0	1	9	1089.58	0.00031426	134.77	52006000000	63	AQLEFNQIK	Q91Z83;Q02566	Myh7;Myh6	Myosin-7;Myosin-6	2210;1453
136400000	0	391430000	5772600	0	511940000	0	0	116670000	492770000	0	85113000	0	7058900	161180000	0	0	196910000	0	62765000	227650000	5338500	0	681750000	0	1	13	1652.79	1.6881e-103	278.27	51688000000	139	ELWDTLYQLETDK	A2A6J1;A2A6I8;A2A6H6;Z4YKF8;Z4YKG3;Z4YKG8;Z4YJU0;Z4YNB2;Q9QZ47;Z4YKH8;Z4YKE7;J3QP61;A2A6I3;A2A6J0	Tnnt3	Troponin T, fast skeletal muscle	43;42;41
18147000	15020000	30590000	12307000	50343000	65567000	36760000	16297000	15433000	41303000	17443000	16758000	100040000	39407000	41340000	10841000	23377000	30797000	7534400	42766000	28666000	49711000	10941000	201130000	2	0	14	1645.8	8.8152e-130	290.17	51273000000	181	LQSIGTENTEENRR	P05064;A6ZI44;D3YWI1;Q9CPQ9;A6ZI46;D3YV98;D3Z510	Aldoa;Aldoart1	Fructose-bisphosphate aldolase A;Fructose-bisphosphate aldolase	870
41068000	20913000	91386000	6802400	12988000	396020000	211160000	101640000	0	238400000	0	33449000	48030000	0	78853000	0	10565000	204080000	0	38346000	87924000	3893800	8160800	355780000	1	0	13	1651.79	6.8999e-104	281.48	51260000000	210	QFLEELLTTQCDR	P97457	Mylpf	Myosin regulatory light chain 2, skeletal muscle isoform	1425
8007800	47674000	2264700	453580000	1519500000	28915000	20737000	4781100	1139200	16150000	1208900000	11742000	1512300000	0	9444400	513740000	495510000	74308000	680090000	47520000	15587000	20604000	763120000	20463000	1	0	16	1739.92	6.9532e-15	172.26	51185000000	114	ILNPAAIPEGQFIDSR	Q91Z83;Q02566;B8JJH5	Myh7;Myh6	Myosin-7;Myosin-6	2210;1453
60872000	28113000	52251000	0	131070000	195760000	1197000	0	0	6259300	45532000	114380000	116200000	3457400	248120000	30077000	54807000	260370000	50423000	119810000	342240000	14475000	61281000	806010000	2	0	14	1663.82	3.2613e-88	257.48	51169000000	224	RIGIFSENEEVTDR	Q8R429	Atp2a1	Sarcoplasmic/endoplasmic reticulum calcium ATPase 1	2098
88558000	194220000	591220000	40539000	1859200000	1506100000	1343400000	7340000	6920900	2252600000	328530000	8078800	1444900000	147820000	205020000	249700000	184690000	353410000	210320000	324480000	235980000	4034300	113140000	790920000	1	0	10	1300.6	1.4163e-130	286.86	50563000000	259	HTNYTMEHIR	P57780;Q9JI91	Actn4;Actn2	Alpha-actinin-4;Alpha-actinin-2	2684;1236
10984000	391090000	12687000	128140000	718090000	35594000	22127000	28230000	5827900	9148000	904700000	4451800	1702100000	26081000	19649000	676120000	258520000	26599000	834510000	26719000	25935000	0	970020000	22110000	0	1	15	1825.88	0	390.07	50244000000	170	AQELSEWIHQLESEK	E9Q688;O88346;J3QPC8	Tnnt1	Troponin T, slow skeletal muscle	543
31486000	48348000	0	0	127590000	3268800	304230000	106850000	0	141860000	0	41453000	165150000	0	90725000	45397000	28409000	37957000	32965000	39502000	95184000	15728000	23432000	142940000	0	1	11	1295.61	1.3683e-17	176.95	50189000000	214	FMIELDGTENK	P21550;Q5SX59	Eno3	Beta-enolase;Enolase	1013
49116000	106220000	155670000	24309000	963450000	322680000	827500000	90929000	58513000	307140000	83215000	36533000	469390000	63326000	60480000	118240000	47519000	73597000	131260000	72470000	59375000	50378000	93826000	156720000	0	1	16	1674.88	2.1867e-46	188.59	50156000000	198	DLAVDSASPVYQAVIK	E9PYJ9;Q9JKS4	Ldb3	LIM domain-binding protein 3	496;2710
0	0	0	0	688870000	0	10090000	130570000	0	0	968430000	0	56604000	462660	189810000	784200000	291220000	337730000	579720000	116940000	365030000	12926000	371810000	330520000	1	2	11	1405.69	1.5731e-17	185.57	50155000000	161	RKLEDECSELK	Q5SX39;Q91Z83;Q5SX40;Q02566;B8JJH5;G3UW82;P13542;P13541	Myh4;Myh7;Myh1;Myh6;Myh2;Myh8;Myh3	Myosin-4;Myosin-7;Myosin-1;Myosin-6;Myosin-8;Myosin-3	1607;2210;655;1608;945;1453;944
0	39756000	0	9772200	13509000	21849000	0	0	4897200	0	31022000	4131600	12595000	8764900	0	0	5188800	23534000	0	9322400	0	9161400	5751500	151370000	1	1	10	1226.64	1.2255e-15	182.93	50154000000	182	HRPDLIDYAK	O88990	Actn3	Alpha-actinin-3	843
46213000	62817000	287690000	132490000	297530000	342130000	94050000	164400000	84864000	267570000	327390000	233590000	152150000	29278000	148810000	68666000	64672000	76844000	87061000	221820000	343690000	66999000	511220000	623670000	1	0	11	1376.68	1.0579e-133	310.25	50126000000	271	HLTEGNQYLFR	E9Q8K5;E9Q8N1;A2ASS6	Ttn	Titin	98;554
0	14953000	0	11362000	67049000	87807000	157390000	14771000	0	36119000	11227000	0	64345000	1486400	16230000	10002000	20562000	39883000	6146000	27299000	25721000	16633000	11422000	2616100	0	1	10	1058.55	1.4393e-31	231.16	49983000000	158	HYGGLTGLNK	Q9DBJ1;O70250	Pgam1;Pgam2	Phosphoglycerate mutase 1;Phosphoglycerate mutase 2	808;2607
5553600	801760000	0	8642800	1736700000	0	0	16983000	0	0	1258900000	0	1150800000	0	9736400	1640400000	376920000	0	1996700000	0	0	1023000	1027900000	17811000	2	1	15	1599.83	1.0417e-75	259.08	49767000000	79	KAADAEAEVASLNRR	E9Q5J9;Q8K0Z5;P21107	Tpm3	Tropomyosin alpha-3 chain	1007;541
303300000	64955000	831400000	58702000	14595000	560100000	824160000	331860000	246670000	840590000	44041000	262430000	69640000	27091000	481170000	11778000	20889000	129480000	0	256710000	493480000	39184000	0	980580000	0	1	16	1787.82	1.3122e-217	332.35	49690000000	325	ASGEHVTEEEIESLMK	P20801	Tnnc2	Troponin C, skeletal muscle	1005
77839000	0	705600000	0	785980000	1114800000	1244700000	289550000	168080000	1137300000	89942000	62220000	435590000	0	105890000	87264000	39142000	368250000	39665000	109360000	181240000	19183000	142700000	579680000	1	0	21	2409.26	0	463.47	49611000000	352	FENAFLSHVISQHQSLLGNIR	Q03265;D3Z6F5	Atp5a1	ATP synthase subunit alpha, mitochondrial;ATP synthase subunit alpha	1456
0	0	0	0	1299000000	1489300000	0	0	790140000	1189100000	0	0	536060000	69041000	488470000	240480000	260110000	506220000	191480000	558660000	1060500000	145510000	245170000	1334100000	0	1	12	1170.62	3.5811e-07	147.39	49578000000	135	VVDALGNAIDGK	Q03265;D3Z6F5	Atp5a1	ATP synthase subunit alpha, mitochondrial;ATP synthase subunit alpha	1456
0	0	821480000	248670000	848790000	800610000	881210000	574000000	378230000	876770000	510800000	0	0	0	613340000	378790000	108610000	352470000	364070000	307420000	770720000	125090000	231240000	744100000	0	1	14	1429.65	2.117e-61	230.23	49551000000	122	TGQAAGFSYTDANK	G3UWG1;P62897	Gm10108;Cycs	Cytochrome c, somatic	657
0	222790000	190410000	75740000	122520000	1057900000	199340000	605100000	379060000	1450700000	0	221360000	585100000	0	341540000	228630000	0	244310000	232530000	196450000	596530000	3428400	382040000	611880000	0	1	10	1087.63	1.4915e-05	125.97	49497000000	116	VVDLLAPYAK	P56480	Atp5b	ATP synthase subunit beta, mitochondrial	1231
82201000	0	167320000	3384100	1506700	36266000	7803200	39538000	5150900	58847000	0	0	4599800	2879700	4038700	0	0	6055300	5319300	14322000	1458400	3506100	0	24812000	1	2	24	2523.4	1.6214e-191	307.21	49486000000	135	ITLSQVGDVLRALGTNPTNAEVKK	P05977;E0CZ30;E9PWG4	Myl1	Myosin light chain 1/3, skeletal muscle isoform	875;477
218260000	293040000	648840000	169760000	1273400000	1924700000	1247900000	409270000	345270000	1207700000	590600000	152040000	1262800000	138090000	202300000	260570000	132400000	107480000	480950000	167750000	338370000	33716000	376030000	936610000	2	0	16	1880.01	2.3844e-73	220.25	49330000000	261	QLVPVRDQSLQEELAR	Q9JI91	Actn2	Alpha-actinin-2	2684
226290000	0	3465200000	0	0	3624900000	7680000	1267200000	1126600000	4079600	0	0	0	37121000	441540000	18003000	0	0	22573000	1074900000	3069200000	35925000	37502000	2840500000	1	0	9	1001.55	1.9663e-21	193.38	49329000000	61	EALVSQLSR	G3UW82	Myh2		655
52222000	51190000	256920000	48056000	319940000	729810000	971260000	104960000	105480000	563320000	68906000	58035000	196800000	110200000	144930000	97037000	31568000	84070000	65143000	93368000	120090000	49098000	98038000	168930000	0	1	16	1786.92	9.3123e-68	218.28	49327000000	214	TITLEVEPSDTIENVK	P62984;E9Q9J0;E9Q5F6;E9QNP0;Q5SX22;P62983;P0CG49;P0CG50;E9Q4P0;J3QK04	Uba52;Ubc;Kxd1;Ubb;Rps27a;Gm7808	Ubiquitin-60S ribosomal protein L40;Ubiquitin;60S ribosomal protein L40;Ubiquitin-40S ribosomal protein S27a;Ubiquitin;40S ribosomal protein S27a;Polyubiquitin-B;Ubiquitin;Polyubiquitin-C;Ubiquitin;Ubiquitin-related 1;Ubiquitin-related 2	1337
7959700	442120000	49800000	282500000	1753300000	23846000	102770000	57261000	16096000	37274000	975580000	5807600	1124900000	0	11028000	895500000	91931000	0	1155600000	29996000	5480000	35753000	1190100000	0	2	1	19	2187.18	2.9855e-44	173.09	49224000000	155	YRILNPAAIPEGQFIDSRK	Q91Z83;Q02566;B8JJH5	Myh7;Myh6	Myosin-7;Myosin-6	2210;1453
12754000	524430000	21698000	343970000	1563100000	54634000	70946000	0	0	0	896300000	0	919690000	14555000	24437000	467310000	331750000	100560000	585660000	48051000	28601000	31731000	2663200000	16774000	2	0	14	1600.82	1.6957e-47	234.83	48688000000	146	AGLLGLLEEMRDER	Q91Z83;Q02566;B8JJH5	Myh7;Myh6	Myosin-7;Myosin-6	2210;1453
205650000	0	980570000	0	570660000	1421700000	766540000	12918000	185350000	873390000	0	208090000	645900000	58491000	485260000	196170000	63285000	357650000	0	324400000	707360000	152780000	290500000	932280000	2	1	11	1325.78	1.4444e-17	173.72	48645000000	167	RLNRPLTLSEK	Q99KI0	Aco2	Aconitate hydratase, mitochondrial	2265
0	0	0	0	0	395930000	0	0	0	0	0	0	439070000	0	185470000	115240000	196780000	183960000	75179000	85019000	195640000	43196000	186350000	791650000	1	0	9	944.544	0.00055221	138.33	48469000000	205	AVFPSIVGR	G3UZ07;E9Q606;F6WX90;P68033;P63260;B1ATY1;G3UYG0;P60710;E9Q5F4;E9Q2D1;P62737;P63268;D3YZY0;D3Z2K3;P68134;E9Q1F2	Actg1;Actb;Actc1;Acta2;Actg2;Acta1	Actin, alpha cardiac muscle 1;Actin, cytoplasmic 2;Actin, cytoplasmic 2, N-terminally processed;Actin, cytoplasmic 1;Actin, cytoplasmic 1, N-terminally processed;Actin, aortic smooth muscle;Actin, gamma-enteric smooth muscle;Actin, alpha skeletal muscle	1367;1364;1310;1354;1255;518;673
141980000	23568000	601340000	78045000	131850000	151180000	131410000	263560000	45928000	432420000	124850000	79959000	303650000	0	13299000	332910000	0	0	576680000	21546000	255500000	38423000	269640000	27082000	2	0	18	2093.05	5.2295e-150	304.2	48288000000	189	SYELPDGQVITIGNERFR	Q8BFZ3;P68033;P63260;P60710;E9Q5F4;P62737;P63268;D3YZY0;P68134;E9Q1F2	Actbl2;Actc1;Actg1;Actb;Acta2;Actg2;Acta1	Beta-actin-like protein 2;Actin, alpha cardiac muscle 1;Actin, cytoplasmic 2;Actin, cytoplasmic 2, N-terminally processed;Actin, cytoplasmic 1;Actin, cytoplasmic 1, N-terminally processed;Actin, aortic smooth muscle;Actin, gamma-enteric smooth muscle;Actin, alpha skeletal muscle	1367;1364;1310;1354;1255;518;1857
155360000	496190000	563710000	128880000	2867000000	946560000	2028600000	567890000	547240000	974930000	981900000	232090000	700420000	287900000	353410000	611240000	78938000	0	753120000	263060000	190140000	250980000	481030000	497070000	2	0	17	2121.02	0	403.19	48286000000	234	VLAVNQENERLMEEYER	Q9JI91	Actn2	Alpha-actinin-2	2684
0	0	956160000	0	4100900000	989390000	2453800000	310400000	735280	1587400000	593760000	0	2254900000	89563000	170990000	182860000	108430000	60488000	472500000	235040000	212480000	129990000	301110000	494930000	1	0	11	1268.59	4.1565e-18	186.87	48170000000	131	DYESASLTEVR	Q9JI91	Actn2	Alpha-actinin-2	2684
13579000	820610000	9930400	336530000	1522700000	25855000	48141000	67958000	14459000	15254000	1275700000	8254800	1389200000	9086800	0	1050800000	281050000	12810000	1026100000	14528000	0	0	452540000	7644200	1	0	17	1985.89	0	362.73	48118000000	128	MEGDLNEMEIQLSHANR	Q91Z83;B1AR69	Myh7;Myh13	Myosin-7	2210;141
0	0	0	0	0	0	1459500000	1005600000	0	0	0	0	1653600000	0	0	563220000	426350000	157660000	0	0	1140600000	0	0	0	1	0	11	1280.62	5.8898e-18	174.4	47773000000	25	ITYGQCGDVLR	P09542;A2A6Q8;Q9CZ19;P09541	Myl3;Myl4	Myosin light chain 3;Myosin light chain 4	909;44
4440400	0	294950000	0	0	553060000	1089400000	46013000	0	233750000	0	0	148770000	20315000	11393000	0	0	0	0	25435000	57802000	6536000	18557000	709910000	0	1	7	850.437	6.0681e-05	148.37	47697000000	115	FCVGLQK	P07310	Ckm	Creatine kinase M-type	884
23908000	11253000	153960000	7944900	61853000	116670000	427890000	46474000	51719000	139140000	81556000	0	141430000	43153000	19610000	21957000	9404900	47848000	23694000	51944000	14710000	36649000	47266000	154890000	1	0	13	1494.75	9.4688e-145	296.28	47585000000	238	YGYTHLSTGDLLR	Q9R0Y5;Z4YN97	Ak1	Adenylate kinase isoenzyme 1	2770
74612000	4019500	117180000	0	119770000	97230000	109950000	80961000	46211000	201450000	149850000	40738000	124250000	11423000	36365000	59816000	36834000	14527000	118540000	36123000	152390000	27153000	165360000	218670000	0	2	14	1705.9	2.1406e-129	288.77	47418000000	379	IYHTSIKPLEQSYK	Q7TQ48	Srl	Sarcalumenin	1816
53088000	17430000	110410000	20782000	26074000	169170000	262790000	79090000	53755000	152640000	8696100	85671000	82838000	36544000	156690000	13430000	22358000	785970000	11387000	94950000	137710000	30927000	14337000	672200000	0	1	16	1647.78	1.1826e-198	320.05	47389000000	323	LEEAGGATSAQIEMNK	Q5SX39;Q5SX40;G3UW82	Myh4;Myh1;Myh2	Myosin-4;Myosin-1	1607;655;1608
229520000	17113000	1816200000	18294000	62264000	2754200000	2388000000	1491300000	773950000	1892900000	0	541170000	306050000	22198000	540470000	33855000	13480000	56812000	18801000	712920000	2038300000	34661000	3040300	1322600000	0	1	20	2242.01	4.6918e-201	324.03	47309000000	168	CELQAALEEAEASLEHEEGK	G3UW82	Myh2		655
55734000	1182000	613890000	29895000	441400000	620500000	712940000	401300000	254610000	700610000	154320000	65144000	343300000	22754000	235390000	55583000	2986500	733540000	28786000	104250000	243170000	19115000	100260000	564270000	1	0	14	1434.75	4.8617e-54	222.75	47283000000	191	FTQAGSEVSALLGR	P56480	Atp5b	ATP synthase subunit beta, mitochondrial	1231
105110000	8449100	544770000	11690000	11727000	335000000	589460000	249320000	194550000	334650000	4869400	231220000	13313000	5782200	99171000	5267600	19508000	13318000	7261900	167110000	292150000	41335000	12131000	524050000	1	1	15	1807.9	0	385.8	47124000000	295	NAYEESLDQLETLKR	Q5SX39;G3UW82	Myh4;Myh2	Myosin-4	1607;655
0	0	647160000	0	0	507890000	625560000	227790000	97998000	620820000	0	85371000	21594000	5994600	213680000	0	1761300	275080000	0	29950000	246160000	0	0	448650000	0	1	11	1265.63	1.2426e-77	260.77	47055000000	145	PLNIDHLSDDK	A2A6J1;A2A6I8;A2A6H6;Z4YKF8;Z4YKG3;Z4YKG8;Z4YJU0;Z4YNB2;Q9QZ47;Z4YKH8;Z4YKE7;J3QP61;A2A6I3;A2A6J0	Tnnt3	Troponin T, fast skeletal muscle	43;42;41
0	395490000	0	241720000	328130000	2633100000	0	0	607450000	0	683480000	565780000	679470000	0	1041400000	355210000	0	166080000	226330000	549850000	1077600000	0	495220000	1647700000	2	0	8	974.533	2.2804e-14	189.72	46779000000	85	RALDLTMR	Q9CQB4;Q9D855	Uqcrb	Cytochrome b-c1 complex subunit 7	2352
75401000	112740000	420520000	50829000	160140000	405530000	97166000	194990000	127920000	297310000	47093000	36441000	250930000	98015000	95056000	76245000	40792000	147210000	33271000	71460000	125050000	52098000	109870000	156820000	0	1	29	2862.46	9.0246e-264	335.34	46612000000	421	VADALANAAGHLDDLPGALSALSDLHAHK	Q91VB8	haemaglobin alpha 2		2166
27446000	0	0	35837000	90763000	144340000	431300000	0	0	0	0	51196000	143790000	73959000	70045000	51816000	42038000	41065000	46911000	63182000	73276000	47343000	60806000	365850000	0	1	12	1129.65	7.8037e-13	160.82	46428000000	127	IIFVVGGPGSGK	Q9R0Y5;Z4YN97	Ak1	Adenylate kinase isoenzyme 1	2770
368900000	54669000	790170000	87931000	17022000	366200000	554920000	379300000	246040000	596110000	43643000	280780000	44365000	26797000	473630000	49153000	4893900	81489000	40845000	308210000	531920000	66348000	51828000	646410000	1	1	13	1581.74	1.4432e-27	209.79	46357000000	289	NNDGRIDFDEFLK	P20801	Tnnc2	Troponin C, skeletal muscle	1005
248120000	18889000	1830300000	9917000	6816100	2295500000	1660600000	1599900000	551540000	2318000000	6593800	648920000	13227000	15085000	576200000	0	0	10390000	5920400	489580000	1767300000	0	8716100	3116700000	2	0	12	1365.66	2.2049e-108	293.76	46305000000	92	GRLQTESGEFSR	G3UW82	Myh2		655
0	0	16861000	5958800	12581000	33943000	8535900	0	0	25077000	10468000	4438700	0	0	0	2138700	4238600	0	0	0	4835600	0	0	137620000	1	0	12	1371.75	2.4251e-70	244.42	46268000000	168	VGWEQLLTSIAR	O88990	Actn3	Alpha-actinin-3	843
1098200	988230	648290000	0	1597900000	1675700000	1554100000	386180000	2140000	1694800000	1913700	2070500	1024000000	157740000	225100000	479670000	101600000	28305000	602770000	250150000	280400000	188410000	508820000	543330000	1	1	22	2410.23	2.1282e-233	337.62	46234000000	223	ATLPEADGERQSILAIQNEVEK	Q9JI91	Actn2	Alpha-actinin-2	2684
5585500	131220000	416360000	54558000	712930000	620500000	996670000	13442000	277200000	943890000	205040000	122420000	361470000	21482000	3677600	149570000	50174000	326080000	162670000	108790000	384360000	31485000	225420000	349820000	0	1	13	1456.83	5.3909e-75	256.31	46164000000	365	TVLIMELINNVAK	P56480	Atp5b	ATP synthase subunit beta, mitochondrial	1231
10743000	11414000	0	8959400	42998000	64593000	101200000	18713000	0	38535000	0	0	58829000	33203000	16064000	0	6585700	20328000	4899300	17635000	18630000	13030000	0	40402000	0	1	15	1674.8	1.1674e-60	225.85	45989000000	289	DLADELALVDVMEDK	P06151;G5E8N5;D3Z736;D3YZQ9	Ldha	L-lactate dehydrogenase A chain;L-lactate dehydrogenase	876
10921000	23337000	179340000	8499900	127170000	224510000	392340000	77613000	41538000	111390000	22550000	3985100	146240000	0	32131000	31608000	12821000	23510000	8531200	34148000	59213000	12798000	26359000	70303000	0	1	15	1632.81	2.1127e-125	287.34	45942000000	248	VNQIGSVTESLQACK	P17182;Q6PHC1	Eno1	Alpha-enolase	978
107500000	142490000	548270000	0	0	1188100000	95428000	299290000	151590000	655230000	802160000	0	457350000	0	454410000	318500000	15671000	33808000	654870000	0	708270000	20847000	302750000	1102200000	1	1	11	1270.67	5.6473e-17	175.57	45926000000	174	GRPTPEITWSK	E9Q8K5;E9Q8N1;A2ASS6	Ttn	Titin	98;554
478270000	6316200	2722500000	11651000	0	1685000000	1626100000	1354500000	871880000	1277500000	12725000	1070800000	0	12508000	409410000	26062000	6800400	0	21243000	318470000	2252500000	16981000	15988000	511950000	2	1	17	2087.06	8.1036e-159	289.68	45856000000	148	SKEEEQQRLINDLTTQR	G3UW82	Myh2		655
0	0	31439000	0	0	0	159180000	37649000	0	467890000	0	14154000	0	0	141550000	4615300	12604000	11791000	1523300	48992000	246210000	33460000	575570	593680000	1	1	11	1339.72	1.008e-91	274.62	45801000000	206	INQQLDTKQPR	Q5SX39;Q5SX40;G3UW82;B1AR69;P13542	Myh4;Myh1;Myh2;Myh13;Myh8	Myosin-4;Myosin-1;Myosin-8	1607;655;1608;945;141
1191300	0	5877500	0	29362000	0	123580000	4617100	1169700	23036000	0	0	0	1767400	1986600	0	686850	11525000	0	1414200	3483800	0	2678500	0	1	0	18	2171.14	0	427.1	45801000000	340	TLWTILDVTDQMWVPVVR	O70250	Pgam2	Phosphoglycerate mutase 2	808
0	0	10126000	1331800	0	10772000	9844700	1214500	664830	5096400	7269100	0	0	1419900	1892700	3777000	0	2803800	4324900	0	3668300	6960600	2707400	276940000	0	2	11	1370.58	1.1303e-70	265.53	45756000000	164	EMANMKEDFEK	Q5SX39	Myh4	Myosin-4	1607
821250000	26099000	1337300000	30903000	22655000	169990000	0	91070000	205900000	2517700000	48839000	26351000	0	30566000	1224000000	0	36732000	1219000000	4456400	59414000	343110000	26266000	50010000	129280000	0	2	24	2183.09	1.3943e-185	287.14	45734000000	323	TLAYLFSGAAAAAEAESGGGGGKK	Q5SX40	Myh1	Myosin-1	1608
1917500	939410	209710000	0	4245600	397340000	581550000	0	0	503910000	0	0	259020000	2935700	310360000	159890000	1470300	223920000	117180000	138640000	569780000	25123000	165390000	510380000	1	1	30	3427.81	0	371.16	45694000000	270	EIYPYVIQELRPTLNELGISTPEELGLDKV	P12787	Cox5a	Cytochrome c oxidase subunit 5A, mitochondrial	939
0	0	0	0	0	413930000	0	0	185900000	0	203850000	252630000	340690000	0	314080000	236260000	233320000	238170000	356800000	373810000	491830000	138060000	195380000	16040000	0	1	8	981.411	0.0042804	102.51	45673000000	96	EYEPEMGK	Q8R429;O55143;J3KMM5;B1ATS4;B1ATS5;E9Q559;Q64518	Atp2a1;Atp2a2;Atp2a3	Sarcoplasmic/endoplasmic reticulum calcium ATPase 1;Sarcoplasmic/endoplasmic reticulum calcium ATPase 2;Calcium-transporting ATPase;Sarcoplasmic/endoplasmic reticulum calcium ATPase 3	2098;803;148
2020700	5822200	38241000	4265000	53864000	68636000	152530000	7772000	5700500	36229000	8661100	13207000	53904000	30558000	23110000	6787400	11948000	13286000	7333200	21708000	9315900	3947200	7345800	92666000	1	0	10	1186.56	2.645e-11	158.79	45592000000	952	GYTLPPHCSR	P07310	Ckm	Creatine kinase M-type	884
118870000	153840000	507430000	82481000	498760000	420480000	631740000	252600000	152370000	680430000	150890000	71559000	476750000	16461000	242960000	189120000	49861000	158320000	195830000	80475000	255770000	7402100	243860000	366490000	1	1	23	2522.35	2.1255e-137	267.96	45583000000	316	TPILAINPIDRPGEPENLHIADK	E9Q8K5;E9Q8N1;A2ASS6	Ttn	Titin	98;554
0	0	0	0	0	0	0	0	0	85935000	0	0	0	0	114700000	60626000	52455000	56782000	32397000	87676000	82752000	0	37745000	172050000	0	1	13	1465.72	9.9875e-21	179.67	45290000000	234	TATPQQAQEVHEK	P17751;H7BXC3	Tpi1	Triosephosphate isomerase	988
77010000	49526000	120340000	137050000	205040000	630160000	815730000	142670000	94304000	50917000	192130000	155940000	546740000	421310000	327370000	72554000	192560000	396660000	49005000	260160000	235540000	192990000	77812000	652220000	0	1	15	1477.63	1.6973e-255	353.45	45284000000	308	HSGDFGADAQGAMSK	P04247	Mb	Myoglobin	866
18156000	12051000	48723000	0	165380000	0	207380000	0	37591000	58597000	0	17350000	164720000	56264000	30051000	20759000	13764000	32225000	12338000	37005000	32226000	24419000	26236000	60438000	0	1	18	1778.87	5.4822e-90	230.29	45231000000	251	GADFLVTEVENGGSLGSK	P52480	Pkm	Pyruvate kinase PKM	1196
0	4604300	4806300	5198500	0	13500000	0	4378700	5235300	15049000	3559800	0	10955000	0	157220000	0	35375000	124950000	52885000	78156000	246620000	77797000	54610000	342710000	1	0	8	804.424	4.1361e-06	167.82	45173000000	83	VGVNGFGR	P16858;A0A0A0MQF6;S4R1W1;D3YYI5;S4R1N5	Gapdh;Gm3839;Gm7293	Glyceraldehyde-3-phosphate dehydrogenase	975
51730000	101410000	126650000	23767000	894930000	476270000	1112100000	81723000	53621000	459720000	126380000	0	397740000	27409000	59562000	52003000	71037000	62998000	30101000	46598000	17905000	10188000	72316000	61272000	2	1	15	1816.83	1.904e-165	311.33	45043000000	345	TQSKPEDEADEWARR	E9PYJ9;Q9JKS4	Ldb3	LIM domain-binding protein 3	496;2710
0	0	1313200	0	0	0	0	0	0	0	0	0	0	0	0	27465000	55627000	262270000	28890000	94741000	245690000	0	48152000	990350000	0	1	8	809.501	0.0016717	147.69	44941000000	79	VPLTGPVK	Q8R429	Atp2a1	Sarcoplasmic/endoplasmic reticulum calcium ATPase 1	2098
43184000	147320000	677330000	115160000	1052500000	988400000	2030500000	356920000	105000000	1160800000	553920000	0	1787700000	67122000	142730000	412120000	211800000	77635000	524660000	316580000	494790000	187420000	387810000	671510000	1	0	13	1354.68	1.2227e-103	279.77	44792000000	241	TIEAEAAHGTVTR	P54071	Idh2	Isocitrate dehydrogenase [NADP], mitochondrial	1207
8692400	2065200	60808000	2219600	140660000	106150000	232670000	28518000	11974000	134220000	3010300	8476100	85022000	45011000	30800000	19875000	5919700	38078000	4673300	36260000	30154000	31124000	25729000	36490000	0	1	25	2447.18	6.198e-207	280.4	44778000000	362	VIPAADLSEQISTAGTEASGTGNMK	Q9WUB3;E9PUM3	Pygm	Glycogen phosphorylase, muscle form;Alpha-1,4 glucan phosphorylase	2793
175110000	0	1613200000	0	925860000	1572500000	1628500000	703610000	459370000	1020900000	360600000	244450000	0	0	0	268850000	91421000	223870000	290670000	283490000	780610000	104690000	388100000	1014200000	1	0	12	1261.63	4.5704e-07	157.03	44757000000	133	TIAMDGTEGLVR	P56480	Atp5b	ATP synthase subunit beta, mitochondrial	1231
3056000	3780100	0	92518000	2111200000	1273100000	1732900000	366280000	4096900	1488600000	384950000	145320000	1342000000	131110000	115230000	266940000	109820000	125040000	281150000	167120000	188090000	122400000	333640000	683610000	1	0	11	1232.6	5.3248e-30	211.78	44696000000	158	MVSDIAGAWQR	Q9JI91	Actn2	Alpha-actinin-2	2684
441740000	17472000	1166100000	19607000	44414000	783930000	1014500000	981180000	646190000	1694400000	25999000	476230000	221010000	36012000	747170000	31987000	14350000	476410000	16760000	435510000	1495400000	48577000	52196000	2053800000	1	0	17	2028.9	0	446.74	44660000000	259	MEGDLNEMEIQLNHSNR	Q5SX40;G3UW82	Myh1;Myh2	Myosin-1	655;1608
57172000	309280000	397090000	146130000	620870000	544800000	816780000	425390000	150610000	595540000	360570000	165000000	409700000	51810000	101100000	296470000	49404000	249460000	286970000	165540000	553330000	67955000	289030000	357160000	0	1	18	1760.75	2.4502e-144	278.19	44525000000	224	ADSAEYSAMTTGGQSSAK	Q6P6L5;D3YU50;F6RQD1	Mybpc1		1749;346;611
224300000	80747000	626440000	54445000	252850000	28328000	21528000	88398000	18848000	173550000	92294000	141120000	370180000	0	25477000	531380000	12517000	18890000	960830000	52261000	240640000	0	288680000	10786000	1	1	19	2121.08	0	482.62	44504000000	201	HADSVAELGEQIDNLQRVK	Q5SX39;Q91Z83;Q5SX40;Q02566;G3UW82;P13542	Myh4;Myh7;Myh1;Myh6;Myh2;Myh8	Myosin-4;Myosin-7;Myosin-1;Myosin-6;Myosin-8	1607;2210;655;1608;945;1453
103280000	115280000	463980000	79985000	205970000	384260000	194600000	212970000	142470000	375660000	272980000	88548000	279850000	13067000	194920000	231840000	54324000	81311000	338680000	86366000	333340000	34206000	231920000	311580000	1	1	21	2162.12	1.091e-96	215.08	44425000000	343	VLDRPGPPEGPLAVSDVTSEK	E9Q8K5;E9Q8N1;A2ASS6	Ttn	Titin	98;554
0	0	0	0	0	141400000	179000000	0	0	0	0	0	138700000	0	0	0	0	0	5488400	33322000	28494000	11579000	0	91486000	1	0	10	1196.6	6.5299e-44	227.99	44052000000	117	PWALTFSYGR	P05064;A6ZI44;Q9CPQ9;A6ZI46;P05063	Aldoa;Aldoart1;Aldoc	Fructose-bisphosphate aldolase A;Fructose-bisphosphate aldolase;Fructose-bisphosphate aldolase C	870
0	0	16633000	0	54979000	81628000	166620000	15429000	14660000	66929000	8036100	0	56473000	30682000	19508000	5577000	8699700	0	0	15677000	0	747970	0	34297000	0	1	11	1226.6	2.0288e-06	134.13	44004000000	152	VVDLMAYMASK	P16858;A0A0A0MQF6;S4R1W1;D3YYI5;V9GX06;D3Z0Z9	Gapdh;Gm3839;Gm7293;Gm11214	Glyceraldehyde-3-phosphate dehydrogenase	975;389
152440000	278530000	618100000	92869000	1205900000	1132300000	1238300000	358830000	338570000	932150000	371100000	117190000	585810000	1119700	106250000	234500000	82768000	154350000	324320000	225930000	208020000	108880000	343720000	599650000	0	1	17	1874.94	3.1593e-117	260.18	43997000000	350	SSIQITGALEDQMNQLK	Q9JI91	Actn2	Alpha-actinin-2	2684
138900000	175250000	529840000	83988000	479000000	1028100000	931710000	236460000	257130000	988990000	209910000	142900000	372540000	36550000	293470000	134170000	0	42939000	124630000	171970000	343080000	72880000	205390000	665860000	2	0	17	1779.98	8.1758e-105	242.1	43836000000	279	RTGAIVDVPVGEELLGR	Q03265;D3Z6F5	Atp5a1	ATP synthase subunit alpha, mitochondrial;ATP synthase subunit alpha	1456
0	47499000	0	289560000	1390800000	0	28798000	5776500	3096100	0	131450000	913940	1187900000	0	0	1873900000	0	0	1742000000	0	5710700	16866000	1989900000	0	1	1	15	1758.87	0	387.91	43809000000	76	LQTENGELSRQLDEK	Q91Z83	Myh7	Myosin-7	2210
0	0	0	0	0	0	0	0	0	0	0	0	0	0	337200000	22676000	71358000	118530000	56620000	88907000	294120000	12433000	63874000	682220000	1	0	9	912.466	0.00037081	128.28	43723000000	129	GAPEGVIDR	Q8R429;O55143;J3KMM5	Atp2a1;Atp2a2	Sarcoplasmic/endoplasmic reticulum calcium ATPase 1;Sarcoplasmic/endoplasmic reticulum calcium ATPase 2;Calcium-transporting ATPase	2098;803
2268800	0	46584000	0	177330000	113930000	316540000	37080000	0	0	0	0	266950000	0	72864000	0	34859000	0	0	82756000	0	69253000	0	98245000	0	1	10	974.486	1.0403e-06	144.77	43548000000	136	AMEAVAAQGK	Q9DBJ1;O70250	Pgam1;Pgam2	Phosphoglycerate mutase 1;Phosphoglycerate mutase 2	808;2607
15033000	74991000	909130000	26630000	530720000	1148200000	1101400000	264140000	151500000	887830000	75786000	11726000	270670000	18833000	172400000	55470000	53426000	82732000	90482000	109290000	270490000	43426000	113800000	363580000	1	0	16	1453.7	5.2325e-67	241.27	43457000000	236	AGAGSATLSMAYAGAR	P08249	Mdh2	Malate dehydrogenase, mitochondrial	900
2093000	8275300	59244000	0	151630000	113570000	351260000	65397000	11445000	80662000	27181000	12310000	25654000	42925000	29498000	10147000	14879000	47615000	18536000	9685500	42929000	22373000	19229000	108230000	0	1	21	2290.05	0	374.57	43256000000	1313	WGEAGAEYVVESTGVFTTMEK	P16858;A0A0A0MQF6;S4R1W1;S4R257	Gapdh;Gm3839	Glyceraldehyde-3-phosphate dehydrogenase	975;2893
1841300	147750000	740960000	77358000	508720000	854670000	815050000	435450000	297670000	641220000	193500000	147910000	22042000	33341000	311430000	152330000	42401000	172370000	178770000	169280000	459970000	80474000	228850000	461030000	0	1	20	2103.03	8.4465e-113	269.85	43253000000	300	GMSLNLEPDNVGVVVFGNDK	Q03265;D3Z6F5	Atp5a1	ATP synthase subunit alpha, mitochondrial;ATP synthase subunit alpha	1456
121360000	64287000	174550000	128530000	591250000	680440000	1051000000	372670000	286890000	799960000	229880000	53793000	284300000	51379000	244260000	146750000	21974000	202590000	184680000	162610000	437690000	27561000	208750000	429660000	0	1	17	1994.93	3.9666e-195	319.74	42987000000	341	GITWGEDTLMEYLENPK	G3UWG1;P62897	Gm10108;Cycs	Cytochrome c, somatic	657
170060000	141510000	765970000	69498000	637650000	1447500000	1254100000	388630000	325810000	1014100000	197150000	186450000	527280000	71303000	352970000	62745000	77049000	373350000	74062000	236050000	386560000	91997000	109180000	732130000	0	1	14	1484.81	1.392e-53	209.79	42971000000	208	EVENVAITALEGLK	Q6P8J7	Ckmt2	Creatine kinase S-type, mitochondrial	1751
[truncated: 35,036 more rows]

## Sheet: S2_Identifications-3
Peptides 45 min
[truncated: 8,175 more rows]

## Sheet: S2_Identifications-4
Peptides, 10 min
[truncated: 832 more rows]

## Sheet: S2_Identifications-5
proteingroups, 240 min
[truncated: 2,686 more rows]

## Sheet: S2_Identifications-6
Proteingroups, 45 min
[truncated: 1,028 more rows]

## Sheet: S2_Identifications-7
proteingroups, 10 min
[truncated: 120 more rows]

## Sheet: S2_proteingroups_CAPvsnLC
protein groups output table of same muscle fibers analyzed by ProFiT on an Easy nLCII-LTQ Orbitrap or a CAP-LC-Qexactive system
[truncated: 294 more rows]
[truncated: 2,004 more columns]

[truncated: 3 more sheets: S2_peptides_CAPvsnLC, S2_CarryOver, S2_Top5MyHCPeptides]
